# Supplementary material for: 3D genome alterations in T cells associated with disease activity of systemic lupus erythematosus
Source: PubMed Central journal article supplement — Ann Rheum Dis. 2022 Sep 1;82(2):226–34. doi: 10.1136/ard-2022-222653 (PMC9887402; doi:10.1136/ard-2022-222653), 2022-09-01
Supplement: ard-2022-222653supp001.pdf [file ard-2022-222653supp001.pdf]

## **Supplemental materials and methods**

Supplemental Methods

Supplemental Tables

Supplemental Figure Legends

Supplemental Figures

Supplemental References

## Supplemental Methods

### Information of SLE patients and healthy controls (HCs)

This study was approved by the ethics committees and institutional review board of the Second Xiangya Hospital of Central South University (No.20193044), and all study participants signed a written informed consent. Blood samples were obtained from patients fulfilling the diagnosis of SLE according to the criteria established by the American College of Rheumatology.<sup>1</sup> Lupus disease activity was assessed using the SLE Disease Activity Index (SLEDAI).<sup>2</sup> Age and sex-matched healthy controls were recruited for reasons not related to cancer, cardiovascular diseases, autoimmune diseases or known infectious diseases. The information of SLE patients and HCs are presented in the Supplemental Table S1.

### Patient and public involvement

Patients were not involved in the design, or conduct, or reporting or dissemination plans of this research.

### Isolation of peripheral CD4<sup>+</sup> T cells

A sum of 60 mL of peripheral venous blood from each patient and healthy subject was preserved with heparin. Peripheral blood mononuclear cells (PBMCs) and CD4<sup>+</sup> T cells were isolated by density gradient centrifugation (GE Healthcare, Switzerland) and by positive selection using Miltenyi beads (Miltenyi, Germany) respectively. The purity of CD4<sup>+</sup> T cells was generally >95%.

### Hi-C library preparation

We performed in situ Hi-C with 5-10 million cells. Briefly, Cells were crosslinked at a final concentration of 2% formaldehyde for 10min in room temperature, and quenched by 200mM glycine. After the completion crosslinking and lysis, chromatin was digested with 400 U MboI restriction enzyme (NEB) at 37 °C. DNA ends were labeled with biotin-14-dATP using Klenow large fragment for 45 min at 37 °C overnight and the enzyme was inactivated with 20% SDS solution. DNA ligation was performed by the addition of T4 DNA ligase (NEB) and incubation at 16°C for 4-6 h. After ligation, proteinase K was added to reverse cross-linking during incubation at 65 °C overnight. DNA fragments were purified and dissolved in water. DNA was

treated with T4 DNA polymerase to remove unligated biotinylated ends and sheared to 300-500bp by bioruptor (time on: 15s, time off: 45s, cycle: 7), and DNA ends were then repaired. DNA fragments labeled by biotin were separated on Dynabeads® M-280 Streptavidin (Life Technologies) and ligated with adapters. PCR amplification were performed with NEB Next Ultra II DNA Library Prep Kit for Illumina. Hi-C libraries were controlled for quality and sequenced on an Illumina NovaSeq 6000 platform to obtain 150 bp paired-end reads.

### **Construction of interaction map**

The sequencing adaptor and low-quality base were trimmed using Trimmomatic (version 0.38)<sup>3</sup>. Clean Hi-C data were iteratively mapped to the human genome hg19 using the hiclib software package (version 1f8815d0cc9e)<sup>4</sup> and dangling ends and other unusable data were filtered. A Hi-C map is a list of DNA-DNA contacts produced by a Hi-C experiment. The valid pairs after pooling were binned into 100kb, 40kb, 20kb, and 10kb nonoverlapping genomic intervals to generate contact maps. Raw Hi-C contact maps were normalized using an iterative normalization method to eliminate systematic biases.

### **Compartment A/B analysis**

The CscoreTool (v 1.1)<sup>5</sup> software was applied to identify A and B compartments on 100kb resolution. For each individual chromosome, genomic bins with a positive or negative c-score signa were divided into the A or B compartment. The active “A” compartments are gene-dense euchromatic regions, whereas the inactive “B”-compartments are gene-poor heterochromatic regions.

### **Topologically associated domains (TADs) analysis**

The TADs were identified using insulation score algorithm<sup>6</sup> on 40kb normalized contact maps. The border of all the samples were merged as all borders collection. The appearance (as value 1) or not (as value 0) of each border in each sample was used to take PCA analysis with pcomp R package.

### **Calculation of intra-and inter-chromosome interactions**

The contacts between 10kb bins of intra-chromosome and inter-chromosome interactions of each sample were transferred to Ay's Fit-Hi-C software (v1.0.1) (with parameter settings -L 20,000 -U 2,000,000 -p 2 -b 200)<sup>7</sup> to calculate the corresponding cumulative probability P value and false discovery rate (FDR) q value. After calculation, the interactions in which both the P value and q value were less than 0.01, and contact count > 2 were identified as significant interactions.

### **Loops analysis**

Loops were identified using mustache software (v 1.0.2)<sup>8</sup> on 10 kb contact maps with parameter: -pt 0.1 -st 0.88. Loops of all samples were merged as all loops collection. To calculate loops strength, as the figure, the loops were mapping on 20kb z-transferred contact map and merge with same contact. The loop strength is the mean contact value of a 140kb (7 bins) on each side square area with the loop contact at center. The strength of each loop in each sample was used to take PCA analysis with pcomp R package.

### **RNA-seq library preparation and data analysis**

The sorted CD4<sup>+</sup> T cells were isolated using a TRIzol (Life Technologies). The total RNA was quantified and qualified by Agilent 2100 Bioanalyzer (Agilent Technologies, CA, USA). A total amount of 1 µg RNA per sample was used and mRNA was purified using poly-T oligo-attached magnetic beads. First strand cDNA was synthesized using random hexamer primer. Second strand cDNA synthesis was subsequently performed using DNA Polymerase I. The library fragments were purified with AMPure XP system (Beckman Coulter, Beverly, USA). The sequencing was performed by Illumina Noveseq.

Raw data of fastq format were firstly processed by removing reads containing adapter, reads containing ploy-N and low-quality reads. And paired-end clean reads were aligned to the reference genome using Hisat2 v2.0.5.<sup>9</sup> The reads numbers were mapped to each gene. And then FPKM of each gene was calculated based on the length of the gene and reads count mapped to this gene. Differential expression analysis of two conditions was performed using the DESeq2 R package<sup>10</sup> (1.16.1). Genes with an adjusted P-value <0.05 found by DESeq2 were assigned as differentially expressed. Gene Ontology (GO) and Reactome pathway enrichment analysis of differentially expressed genes were implemented by R package.<sup>11</sup>

### **ATAC footprint analysis**

The raw ATAC data were filtered to remove reads containing adapter, reads containing ploy-N and low quality. Filtered reads were aligned to reference genomes hg19. The peaks were called using MACS2<sup>12</sup> (v 2.1.1, -f BED --nomodel --shift -75 --extsize 150 -B --SPMR --keep-dup=all). The Transcription factors footprint were analyzed using HINT<sup>13</sup> (v0.13.0).

### **Quantitative RT-PCR**

1µg RNA was extracted from cells infiltrated in TRIzol reagent (Thermo Fisher Scientific). Additionally, cDNA was generated by reverse transcription with a PrimeScript RT reagent kit, following the manufacturer's instructions. The transcript was analyzed for the expression of genes with a CFX96 Touch (Bio-Rad). Primer sequences were listed in Supplemental Table S6.

### **CRISPR/Cas9 mediated genomic DNA fragment knock out in Jurkat cell line**

The Cas9 stably expressed Jurkat cell line was purchased from Yuanjing biology corporation. Each gRNA with chemical modifications comprising 2'-O-methyl and phosphonothioate modifications at 5' and 3' ends was synthesized by GenScript corporation. sgRNA sequences were listed in Supplemental Table S5. Two gRNA (50 pmol) were transfected into 3×10<sup>6</sup> Cas9 stably expressed Jurkat cells in 100 µl opti-MEM solution by Lipofectamine 3000 (Thermo Fisher). After 3 days of culture, the cells were harvested to detect gene expression.

### **Luciferase reporter assay**

Candidate gene promoter and/or promoter looping interaction regions were cloned into the pGL3-basic vector (Promega). Basal gene promoter construct or empty basic pGL3-basic vector were controls. Renilla luciferase plasmid was used as a normalization control. Luciferase reporter activity was measured in 293T cells by the Dual-Luciferase Reporter Assay System (Promega) using a Luminoeter (Promega). The DNA sequences for luciferase reporter assay were shown in Supplemental Table S7

### **Transfection of SPI1 siRNA**

Purified CD4<sup>+</sup> T cells were transfected with a Human T cell Nucleofactor Kit and an Amaxa nucleofactor (Lonza). CD4<sup>+</sup> T cells were then resuspended in human T cell nucleofactor solution, and SPI1-siRNA was added. SPI1 siRNA and Entransfer-R (Engreen) reagents were prepared by

mixing them with Opti-MEM. Following incubation at room temperature for 5 minutes, the siRNAs and transfection reagents were mixed and incubated at room temperature for 30 minutes. The transfection cocktail was added to each well and cells were incubated at 37°C. The complete medium was replaced after 6 hours.

### **3C assay**

3C experiments were constructed according to previous studies<sup>14</sup>. Briefly, samples were crosslinked with 1% formaldehyde for 10 min and then quenched with 0.125 M glycine at room temperature. The cross-linked samples were subsequently lysed. Endogenous nuclease was inactivated with 0.3% SDS, then chromatin DNA were digested by 100 U Hind III (NEB), and ligated by 50 U T4 DNA ligase (NEB). After reversing cross-links, the ligated DNA was extracted through QIAamp DNA Mini Kit (Qiagen) according to manufacturers' instructions. 3C-qPCR was then carried on the 3C DNA at the regions of interest and normalized to loading controls. Primers used in the 3C assay are listed in Supplemental Table S6.

### **Chromatin immunoprecipitation PCR**

CD4<sup>+</sup> T cells transfected with 200nM SPI1 siRNA or negative controls (RiboBio) were isolated for chromatin immunoprecipitation (ChIP) with anti-H3K4me1, anti-H3K4me3 and anti-H3K27ac antibody (Active Motif) and anti-SPI1 antibody (CST) using the ChIP kit (Millipore). The detailed protocol has been described in our previous study.<sup>15</sup> Immunoprecipitated DNA and input DNA were assessed by real-time PCR. The resulting DNA fragments were purified and subjected to PCR with the use of primers encompassing *DDX60L* promoter regions. Primer sequences are listed in Supplemental Table S6.

### **In vitro Th9 cell differentiation**

Naive CD4<sup>+</sup> T cells were purified from PBMC cells of health adults and were cultured in the presence of plate-bound anti-CD3 (5µg/mL) plus soluble anti-CD28 (5 µg/mL) and Th9-polarizing cytokines TGF-β (5 ng/mL) and IL-4 (10 ng/mL). Cell cultures were transfected with control siRNA (si-NC) and SPI1 siRNA (si-SPI1) respectively. After 3 days of culture, the cells were harvested for subsequent analysis.

**Statistical analysis.**

Statistical analyses were performed in the SPSS 25.0 software. All data are presented as the mean  $\pm$  S.E.M. All statistical analyses were calculated using paired or unpaired two-tailed Student's *t* test, unless otherwise mentioned. Asterisks define the significance level (\**P* < 0.05; \*\**P* < 0.01; \*\*\**P* < 0.001).

## Supplemental Tables

Table S1. Demographics and characteristics of subjects

| Demographics                               | SLE1   | SLE2  | SLE3  | SLE4  | SLE5  | SLE6  | SLE7 | HC1 | HC2 | HC3 | HC4 | HC5 |
|--------------------------------------------|--------|-------|-------|-------|-------|-------|------|-----|-----|-----|-----|-----|
| Sex                                        | F      | F     | F     | F     | F     | F     | F    | F   | F   | F   | F   | F   |
| Age (years)                                | 31     | 19    | 43    | 38    | 41    | 32    | 58   | 26  | 37  | 40  | 29  | 35  |
| SLEDAI-2K score                            | 4      | 13    | 20    | 8     | 6     | 6     | 0    | -   | -   | -   | -   | -   |
| course (months)                            | 2      | 18    | 185   | 96    | 126   | 5     | 100  | -   | -   | -   | -   | -   |
| <b>Clinical manifestations</b>             |        |       |       |       |       |       |      |     |     |     |     |     |
| Proteinuria                                | +      | -     | +     | +     | +     | -     | -    | -   | -   | -   | -   | -   |
| Alopecia                                   | -      | +     | +     | +     | -     | -     | -    | -   | -   | -   | -   | -   |
| Arthritis                                  | -      | -     | -     | -     | -     | +     | -    | -   | -   | -   | -   | -   |
| Rash                                       | -      | -     | -     | -     | -     | +     | -    | -   | -   | -   | -   | -   |
| <b>Laboratory tests</b>                    |        |       |       |       |       |       |      |     |     |     |     |     |
| C3, g/L                                    | 0.31↓  | 0.43↓ | 0.47↓ | 0.78  | 0.65↓ | 0.62↓ | 1.17 | -   | -   | -   | -   | -   |
| C4, g/L                                    | 0.28   | 0.07↓ | 0.13  | 0.18  | 0.19  | 0.48  | 0.27 | -   | -   | -   | -   | -   |
| ANA                                        | +      | +     | +     | +     | +     | +     | +    | -   | -   | -   | -   | -   |
| Anti-dsDNA                                 | -      | +     | +     | -     | -     | +     | -    | -   | -   | -   | -   | -   |
| WBC, *10 <sup>9</sup> /L                   | 15.47↑ | 2.2↓  | 5.36  | 10.5↑ | 9.02  | 3.67↓ | 7.52 | -   | -   | -   | -   | -   |
| RBC, *10 <sup>12</sup> /L                  | 4.97   | 3.67  | 4.51  | 3.98  | 3.76  | 4.03  | 4.29 | -   | -   | -   | -   | -   |
| HGB, g/L                                   | 145    | 114   | 135   | 121   | 120   | 115   | 139  | -   | -   | -   | -   | -   |
| PLT, *10 <sup>9</sup> /L                   | 300    | 125   | 227   | 219   | 210   | 243   | 129  | -   | -   | -   | -   | -   |
| <b>Treatment</b>                           |        |       |       |       |       |       |      |     |     |     |     |     |
| Glucocorticoid dose, prednisolone(mg /day) | 50     | 10    | 10    | 20    | 10    | 0     | 10   | -   | -   | -   | -   | -   |
| Immunosuppress or (CTX or Tacrolimus)      | -      | -     | -     | +     | +     | -     | +    | -   | -   | -   | -   | -   |
| HCQ                                        | +      | +     | +     | +     | -     | +     | +    | -   | -   | -   | -   | -   |

SLEDAI: SLE Disease Activity Index, C3: complement 3, C4: complement 4, ANA: anti-nuclear antibody, WBC: white blood cell, RBC: red blood cell, HGB: hemoglobin, PLT: blood platelet, HCQ: hydroxychloroquine, CTX: Cyclophosphamide.



**Table S2. Samples data information**

| <b>Sample ID</b> | <b>Hi-C data (raw reads)</b> | <b>RNA-seq data (raw reads)</b> |
|------------------|------------------------------|---------------------------------|
| HC1              | 2,378,413,632                | -                               |
| HC2              | 1,985,010,151                | 92,328,206                      |
| HC3              | 1,570,793,350                | -                               |
| HC4              | 1,637,397,857                | 85,430,604                      |
| HC5              | 2,004,764,210                | 102,037,078                     |
| SLE1             | 2,326,628,278                | 91,302,090                      |
| SLE2             | 2,255,780,626                | -                               |
| SLE3             | 1,794,534,212                | -                               |
| SLE4             | 2,076,796,696                | 89,617,234                      |
| SLE5             | 1,999,428,313                | -                               |
| SLE6             | 2,149,074,761                | -                               |
| SLE7             | 2,255,088,114                | 89,468,246                      |

**Table S3. Loops that strength correlated with SLEDAI overlap DEG. (Excel file)****Table S4. Loops that strength correlation with other clinical parameters of SLE patients. (Excel file)****Table S5. GO and pathway enrichment analysis in SLE looping associated genes. (Excel file)****Table S6. Primer sequences and sgRNA sequences**

| Sequence name          | Sequence (5' to 3')       |
|------------------------|---------------------------|
| <b>RT-qPCR primers</b> |                           |
| β-actin-F              | CATGTACGTTGCTATCCAGGC     |
| β-actin-R              | CTCCTTAATGTCACGCACGAT     |
| SPI1-F                 | GTGCCCTATGACACGGATCTA     |
| SPI1-R                 | AGTCCCAGTAATGGTCGCTAT     |
| DDX60L-F               | AAAGCCTCATAACAACACTTGGAA  |
| DDX60L-R               | CCGATCCTTCTGACCATAGGTG    |
| LTBP1-F                | GCGATGAGTTGAACAACCGGATGTC |
| LTBP1-R                | TCAAGGCGGTATTCATCGGAGTGC  |
| CXCL13-F               | GAGGCAGATGGAACCTTGAGC     |
| CXCL13-R               | CTGGGGATCTTCGAATGCTA      |
| SLC8A-F1               | ACAACATGCGGCGATTAAGTC     |
| SLC8A-R1               | GCTCTAGCAATTTTGTCCCA      |
| IFIT1-F                | TTGATGACGATGAAATGCCTGA    |
| IFIT1-R                | CAGGTCACCAGACTCCTCAC      |
| ATG5-F                 | GCAGATGGACAGTTGCACACAC    |
| ATG5-R                 | GAGGTGTTTCCAACATTGGCTCA   |
| HDC-F                  | CAACTTCTCACTCCGAGGG       |
| HDC-R                  | GTTGCACAGACAAAGACGG       |
| FCER1A-F               | AGTCTTCAGTGACTIONGGCTG    |
| FCER1A-R               | TACACATCCCAGTTCCTCC       |
| IL9-F                  | CTCTGTTTGGGCATTCCCTCT     |
| IL9-R                  | GGGTATCTTGTTTGCATGGTGG    |
| IRF1-F                 | CTGTGCGAGTGTACCGGATG      |
| IRF1-R                 | ATCCCCACATGACTTCTCTT      |
| ETV5-F                 | TCAGCAAGTCCCTTTTATGGTC    |
| ETV5-R                 | GCTCTTCAGAATCGTGAGCCA     |
| BATF-F                 | TATTGCCGCCAGAGAAGAGC      |
| BATF-R                 | GCTTGATCTCCTTGCGTAGAG     |
| FOXO1-F                | TCGTCATAATCTGTCCCTACACA   |
| FOXO1-R                | CGGCTTCGGCTCTTAGCAAA      |

|                                        |                            |
|----------------------------------------|----------------------------|
| NFATC2-F                               | GAGCCGAATGCACATAAGGTC      |
| NFATC2-R                               | CCAGAGAGACTAGCAAGGGG       |
| <b>ChIP-qPCR primers</b>               |                            |
| DDX60L promoter loci 1-F               | AAGGCTTTCATATACATGCCCA     |
| DDX60L promoter loci 1-R               | ACCATTTTATTCAGTGGGTCATCC   |
| DDX60L promoter loci 2-F               | TCTTAACTCCTTTAGCCACCAACT   |
| DDX60L promoter loci 2-R               | GCCTTGCTCAACAGATAATTCAGG   |
| DDX60L promoter-SpiI ChIP-F            | AGGCCTTTTCGATTTCCGCA       |
| DDX60L promoter-SpiI ChIP-R            | TGCTTAGCGTGCTGCATTTAC      |
| <b>sgRNA sequence for CRISPER-Cas9</b> |                            |
| DDX60L-enhancer1-left                  | TCAGCGTTAGCACTAGCCGCAGG    |
| DDX60L-enhancer1-right                 | ACGACACCCTTCGCGATGAATGG    |
| DDX60L-enhancer2-left                  | TAGGAGTCTGAGTAGCCGCAGGG    |
| DDX60L-enhancer2-right                 | TATGAATCTACTGCGAGCTCAGG    |
| CXCL13 enhancer-left                   | AAGCATTACTGACCAGTACT GGG   |
| CXCL13 enhancer-right                  | GGCCACATGAATACCAACAC TGG   |
| <b>3C-qPCR primers</b>                 |                            |
| P                                      | GGGTATGAACCATCCTGAGGCA     |
| A                                      | GGACCCCAATAGCTCAGCTT       |
| B                                      | GGCACAGATATTTTCACAGCCAT    |
| C                                      | CCTATTTGCTGACTTCCCATCAAGT  |
| D                                      | GCGACTTTGATGCTTGCTTTCACTT  |
| E                                      | GACTTGCCTAAGGTTACACAGCTAGT |
| F                                      | GAACATACTCGGGCTTTGTCAA     |
| G                                      | GCCTATGCAAGCCTTTTAGCAAT    |
| GAPDH-R                                | CCACATCGCTCAGACACCAT       |
| GAPDH-F                                | CCCGCAAGGCTCGTAGAC         |

Table S7. The inserted DNA sequences in luciferase reporter vector

| Target regions         | Position                           | DNA sequences                                                                                                                                                                                                                                                                                                                                                                                                                                                                                                                                                                                                                                                                                                                                                                                                    |
|------------------------|------------------------------------|------------------------------------------------------------------------------------------------------------------------------------------------------------------------------------------------------------------------------------------------------------------------------------------------------------------------------------------------------------------------------------------------------------------------------------------------------------------------------------------------------------------------------------------------------------------------------------------------------------------------------------------------------------------------------------------------------------------------------------------------------------------------------------------------------------------|
| <b>DDX60L promoter</b> | GRCh38<br>chr4:168480520-168481202 | CTAGGGAGTTAGTTTCGGTTTCTTTTCTCCACCGGAGGCCT<br>TTTCGATTTCGCAGTTTCTGGAGGTAGAATATAGGTCTGC<br>ATTGGTTTACTCTGAGAATCTTAGGGAAGTAATAGTAGAAG<br>CGATGATATGCTATCTGGGACATGCATGTAATTGTAAAGGG<br>AAAGAAAAGCAGAGAAATCTGGGACTCTAAACAAGGAATTG<br>AGGCTGAGAGTAAATGCAGCACGCTAAGCACTATGAAAGTC<br>TGCGGTGAGGTGTGGCGTTTTTCTTTCTGGCAAGGTACTGG<br>ACAGGCAAAAATGGAGTAAAAAAGGATTAGGGGCTTGAG<br>TTCTGTCTTAAGAAGTTCATTTTATGAAAAATTTCCAATAG<br>TATAACTGTCCAGTGTGAACATTTGAAAGACCAATCATCTAT<br>CACAGAGAATTTAAATTGAGAAGAAGAATGCTCTTTAGTTT<br>TGTCATCAAGCTCATTAAATGTTTGAAATTCGAGTTTCAACCC<br>CAGCCCATCATGGTCTTTAGTGCTCCAGACGCTTAATTCCAT<br>GACGTTATGCATGTGCAGAATATATTGAGATTCAAGGTGGT<br>GGTGAGGGTGCCCCAGTAACGGCATGGGGTAATAAATGGA<br>GAGAAATCGAAACCGGAAGTTCTGTCTTCAAGAAAAGGAA<br>AGGGTGAAGTGACTTGTTACA                                             |
| <b>DDX60L enhancer</b> | GRCh38<br>chr4:169009969-169010486 | TTTGGCCCCTCCAGGTTTCTGGCAATGACCGCCAGTCGGTA<br>GCCTTTCGGGCCATTAAGTGGGCCACAGCTCTGCCAATGCC<br>TCGGGAGCCTCCAAAAACAGCACACACTTTGTCCATCTCGG<br>AGTCACAAACTCGGAGGAAAGAGGGTAGGGAGTGGGAGCC<br>CCTCTCCAGGTTCCCTCAGGCTTTTAAACAACCGCGGTTCCA<br>AAAAAAAAAAAAAAAAAGAAAAAAAAAGGCAAAACCGCAAAAA<br>AAATAACGCCGCTCGACACCTCCTGCAGCCGCACAATAGTA<br>ATGCAAGACGCCGTGAAAAGGAGGAAGAGCTCGACGTCGC<br>CGCGTCGACGTCATCACGCACGGACTCTTCCGCGCCACACC<br>TAACAAATACGCCGACGAGAGCTCCCCGCCGCGGAAGAAT<br>GGCCTGGAGAGGGCCTCGATGCTTGCTGGGACCTGTAGTCT<br>TGACGATGAGAGCAACTGGCGCAGGCGCGCTGCTCGGTGG<br>GGAATGTACTTGTGGCACTGAGGGGG                                                                                                                                                                                                                            |
| <b>CXCL13 promoter</b> | GRCh38<br>chr4: 77601816-77602542  | TTACTGATACTGGTGGCCTGGGGAAGTTAACAAGGCAAATA<br>AGTGTGGAGTCGGGATACAAACCGAGCCAGTCTGATTTCA<br>GAGCCTGAGCTCTCACCTCCAAGGTTATAACTTTTCTATT<br>GTGCTGAAAGTTATGTGGGAGCAACAGATGTCAGATGTTT<br>AGCAGGTTAAAACATGTGTTAACAGGATACAGTAAGTTTCT<br>GTTTTCTAGTTGAGTGGCATGAAAGAAAATGTTCTCAATTGT<br>ATCACAGTGACATTTGTCCTATCTCTTACTACAAACTACTTT<br>ATTTAATCACTGTGAAACTCTACCGTTAACTCTGTTTAAT<br>ACCTGTTGACTACCTAGATTGTCAGATACTTTGTCCAATTAT<br>GCCATCTCACTGTTTTAGTGACATTTCACTTTTTGATATCTTG<br>AGAGAGAGTTTCTTCTTGTCACTGCTCTGCATTTAGATGTC<br>AGTGAGTACTGACATCTACAGTGGATGTGTCTGTCCACTTT<br>TACTAAAATAAGGTATCTATGCATCATTTTCTGAGGAAATGT<br>CTTGTTCAAACATATCTCTGAAGATAATTTGAATGTGCATAA<br>TATCTTATCCAGAAATAGCATGCCACAGCAAACTATGCAG<br>CTTATGTTAGACCAGGCCATGCATTCAAACCACCTGAGAA<br>TCTCGTTGAATGCAGGACCTGAGATTCTACATTTTAAACTAG<br>CTCTCGGGTGAAGTTAA |
| <b>CXCL13 enhancer</b> | GRCh38<br>chr4:77384967-77385764   | GGGCTATGCCTGCATGTTCTGGGGGAGTGCTAGTGAGCCAT<br>ATTTGGTGTATGGGTTATGGAATAGGATATCACTGTTCTGT<br>GGCACAGCTATACATTCTATATTTTGCTTCTAAATTGATCAT<br>CTTTTATATTGTGGGCAGGCAAGTGTGTAAGTTAGAGCCTT                                                                                                                                                                                                                                                                                                                                                                                                                                                                                                                                                                                                                                |

|  |  |                                                                                                                                                                                                                                                                                                                                                                                                                                                                                                                                                                                                                                                                                                              |
|--|--|--------------------------------------------------------------------------------------------------------------------------------------------------------------------------------------------------------------------------------------------------------------------------------------------------------------------------------------------------------------------------------------------------------------------------------------------------------------------------------------------------------------------------------------------------------------------------------------------------------------------------------------------------------------------------------------------------------------|
|  |  | GACCTTGGTAAAGGTTGCTTGGCACTTGGCACTTTGTTTTT<br>GGGGAACCAAGAGTTTATTTCTGCTTTTTAATCAGGGACTCA<br>CTCAACAGAGGTCTCCATGTGAAAGCAAGTCTGTAATAAAA<br>AGCTAAACAGCACTTCTGTGGACCTCTCAGTGGTTATTTGAT<br>TGGATGGCTCAAAGTGTATCAGATCATGAGTTAACTTCCTG<br>TATGAGGGAGATGGCTTTAGAGTCCAGGATGAGGTATCTGA<br>GACCACAGGACACTGCTAGAACTGACTCGCTGACTTCTAT<br>GCTTACGAGATATGAGTGGTCTTGTGCATCCCTCCCAGGGT<br>TTCTGGAAGTGCATGTGGGGTGTGAAAGAATCAGACAAGTC<br>CCAAAGGTAACTGCCAGGGCAGAACTCTGAAACCTGATT<br>CACTGTGTTGGCCAGAAGAGGGCAGCACTCACACAGCAGAA<br>CAACTTACGCATTCAGTGACTTCAAGGAGGATCCATACTC<br>AGAGCCAACGATCCCTGAGAAAGCCTGGAGAGGGGTTGGG<br>GCCTCAAATGAGCAGCTTCTTAGTGATGTTTCTGGGAAGAA<br>AGAATGGACAAGTGAGTGGCCTCTTGGCCTGATAAGTACTT<br>TGCACTAAAAGA |
|--|--|--------------------------------------------------------------------------------------------------------------------------------------------------------------------------------------------------------------------------------------------------------------------------------------------------------------------------------------------------------------------------------------------------------------------------------------------------------------------------------------------------------------------------------------------------------------------------------------------------------------------------------------------------------------------------------------------------------------|

**Figure S1. Gene expression difference between SLE patients and health controls before excluding SLE7 and HC5.**

(A) The Correlations between the six samples.

(B) Heat map represent different expressed genes between SLE patients (SLE1, SLE4, SLE7) and health controls (HC2, HC4, HC5).

**Figure S2. SLE loops were identified by SLEDAI scores and gene expression profile.**

(A) The distribution of Pearson correlation coefficient between loop strength and SLEDAI score. red bars indicate positive correlation loops (Pearson value > 0.6), green bars indicate negative correlation loops (Pearson value < -0.6).

(B) GO functional enrichments of the genes overlapped with loops (241 in all) which strength high correlated (both positive and negative) with SLEDAI score.

(C) The percentages of loop interaction type from 391 SLE associated loops.

(D) Heat map showing relative gene expression of DEGs genes from CD4<sup>+</sup> T cell RNA-seq data of SLE in this study and public GEO dataset (GSE97263).

(E) RT-qPCR results of SLE associated gene expression in CD4<sup>+</sup> cells of SLE (n=18) and HCs (n=18). \* P < 0.05, \*\* P < 0.01, \*\*\* P < 0.001 by unpaired two-tail Student's *t* test.

**Figure S3. Long term interaction around gene *DDX60L***

(A) Relative luciferase activity was measured in 293T cells transfected luciferase reporter vector containing *DDX60L* promoter region with or without promoter looping interaction regions. The results are normalized to internal Renilla activity.

(B) RT-qPCR analysis showing the relative *DDX60L* mRNA level in Jurkat cells, which were transfected with 2 pairs of sgRNA targeting *DDX60L* looping interaction regions, respectively.

\*\*\* P < 0.001 by paired two-tail Student's *t* test.

(C) CHIP-qPCR analysis of the enrichment of SPI1 bound to the *DDX60L* promoter from CD4<sup>+</sup> T cells transfected with SPI1 siRNA or negative control. \* P < 0.05, \*\* P < 0.01 by paired two-tail Student's *t* test.

(D) Seven primer pairs used for the 3C assay are shown on the diagram. Promoter primer of *DDX60L* is used as an anchor primer (corresponding to P), the primer from *DDX60L* promoter looping regions are marked with "E", and another primers are used for control sites, where

locates at points A, B, C, D, F and G.

(E) Normalized 3C signal ratios were calculated for the *DDX60L* promoter looping interaction (indicated as E) after control siRNA (si-NC) or SPI1 siRNA (si-SPI1) transfected CD4<sup>+</sup> T cells. Six regions (A, B, C, D, F, G) were used as an internal genomic control. \* P < 0.05 by paired two-tail Student's *t* test.

(F) RT-qPCR results of Th9 associated gene expression in CD4<sup>+</sup> T cells of SLE (n=18) and HCs (n=18). \* P < 0.05, \*\* < 0.01 by unpaired two-tail Student's *t* test.

(G)mRNA expression of Th9 cell-related genes determined by RT-qPCR in Th9 cell differentiation treated with control siRNA (si-NC) and SPI1 siRNA (si-SPI1) respectively. \* P < 0.05 by unpaired two-tail Student's *t* test.

#### **Figure S4. Long term interaction around gene *CXCL13*.**

(A) Genomic features of localize region of gene *CXCL13*. From the top, genomic coordinates, ChIP-seq peaks of H3K4me1, H3K4me3 and H3K27ac in activate CD4<sup>+</sup> T cell from public data, Gene location (gene are marked with red), the loops that strength correlated with SLEDAI score and gene expression.

(B) Difference chromatin interaction map of *CXCL13* localized region. The 20kb binned heatmap depicting the Z-score difference between health controls (different rows) and SLE patients (different columns) are shown. The gene is marked at the bottom.

(C) Gene expression level of *CXCL13* in samples of HC2, HC4, HC5, SLE1, SLE4, and SLE7.

(D) Loop strengths of the two loops in all the samples. The points size reflects the SLEDAI scores.

(E) Relative luciferase activity was measured in 293T cells transfected luciferase reporter vector containing *CXCL13* promoter region with or without promoter looping interaction regions. The results are normalized to internal Renilla activity. \*\* < 0.01 by unpaired two-tail Student's *t* test.

(F) RT-qPCR analysis showing the relative *CXCL13* mRNA level in Jurkat cells, which were transfected with a pair of sgRNA targeting *CXCL13* promoter interaction regions. \* < 0.05 by unpaired two-tail Student's *t* test.

#### **Figure S5. Long term interaction around gene *SLC8A1-AS1*.**

(A) Genomic features of localize region of gene *SLC8A1-AS1*. From the top, genomic

coordinates, ChIP-seq peaks of H3K4me1, H3K4me3 and H3K27ac in activate CD4<sup>+</sup> T cell from public data. Gene location (gene are marked with red), the loops that strength correlated with SLEDAI score and gene expression.

(B)Difference chromatin interaction map of *SLC8A1-AS1* localized region. The 20kb binned heatmap depicting the Z-score difference between health controls (different rows) and SLE patients (different columns) are shown. The gene is marked at the bottom.

(C) Gene expression level of *SLC8A1-AS1* in samples of HC2, HC4, HC5, SLE1, SLE4, and SLE7.

(D)Loop strengths of the two loops in all the samples. The points size reflects the SLEDAI scores.

**Figure S6. Long term interaction around gene *DNAJB4*.**

(A)Genomic features of localize region of gene *DNAJB4*. From the top, genomic coordinates, ChIP-seq peaks of H3K4me1, H3K4me3 and H3K27ac in activate CD4<sup>+</sup> T cell from public data, Gene location (gene are marked with red), the loops that strength correlated with SLEDAI score and gene expression.

(B)Difference chromatin interaction map of *DNAJB4* localized region. The 20kb binned heatmap depicting the Z-score difference between health controls (different rows) and SLE patients (different columns) are shown. The gene is marked at the bottom.

(C) Gene expression level of *DNAJB4* in samples of HC2, HC4, HC5, SLE1, SLE4, and SLE7.

(D)Loop strengths of the two loops in all the samples. The points size reflects the SLEDAI scores.

**Figure S7. Long term interaction around gene *CASP5*.**

(A)Genomic features of localize region of gene *CASP5*. From the top, genomic coordinates, ChIP-seq peaks of H3K4me1, H3K4me3 and H3K27ac in activate CD4<sup>+</sup> T cell from public data,

(B)Gene location (gene are marked with red), the loops that strength correlated with SLEDAI score and gene expression.

(C)Difference chromatin interaction map of *CASP5* localized region. The 20kb binned heatmap depicting the Z-score difference between health controls (different rows) and SLE patients (different columns) are shown. The gene is marked at the bottom.



(D) Gene expression level of *CASP5* in samples of HC2, HC4, HC5, SLE1, SLE4, and SLE7. Loop strengths of the two loops in all the samples. The points size reflects the SLEDAI scores.

**Figure S8. Local genomic 3D features around SLE risk SNP rs2732549.**

(A) Chromatin interaction map of rs2732549 localized region of all the samples. The rs2732549 is indicated at the bottom.

(B) Difference chromatin interaction map of rs2732549 localized region. The 20kb binned heatmap depicting the Z-score difference between health controls (different rows) and SLE patients (different columns) are shown. rs2732549 is indicated at the bottom.

(C) Genomic features of localized region of rs2732549. From the top, genomic coordinates, ChIP-seq peaks of H3K4me1, H3K4me3 and H3K27ac in activate CD4<sup>+</sup> T cell from public data, gene location, gene expression difference between SLE patients and health controls. Red mean upregulation in SLE sample, blue mean downregulation in SLE sample. The color reflects the log base 10 of interaction's p-value.

**Figure S9. Local genomic 3D features around SLE risk SNP rs2245214.**

(A) Chromatin interaction map of rs2245214 localized region of all the samples. The rs2245214 is indicated at the bottom.

(B) Difference chromatin interaction map of rs2245214 localized region. The 20kb binned heatmap depicting the Z-score difference between health controls (different rows) and SLE patients (different columns) are shown. rs2245214 is indicated at the bottom.

(C) Genomic features of localized region of rs2245214. From the top, genomic coordinates, ChIP-seq peaks of H3K4me1, H3K4me3 and H3K27ac in activate CD4<sup>+</sup> T cell from public data, gene location, gene expression difference between SLE patients and health controls. Red mean upregulation in SLE sample, blue mean downregulation in SLE sample. The color reflects the log base 10 of interaction's p-value.

## Supplemental Figures

**Figure S1. Gene expression difference between SLE patients and health controls before excluding SLE7 and HC5.**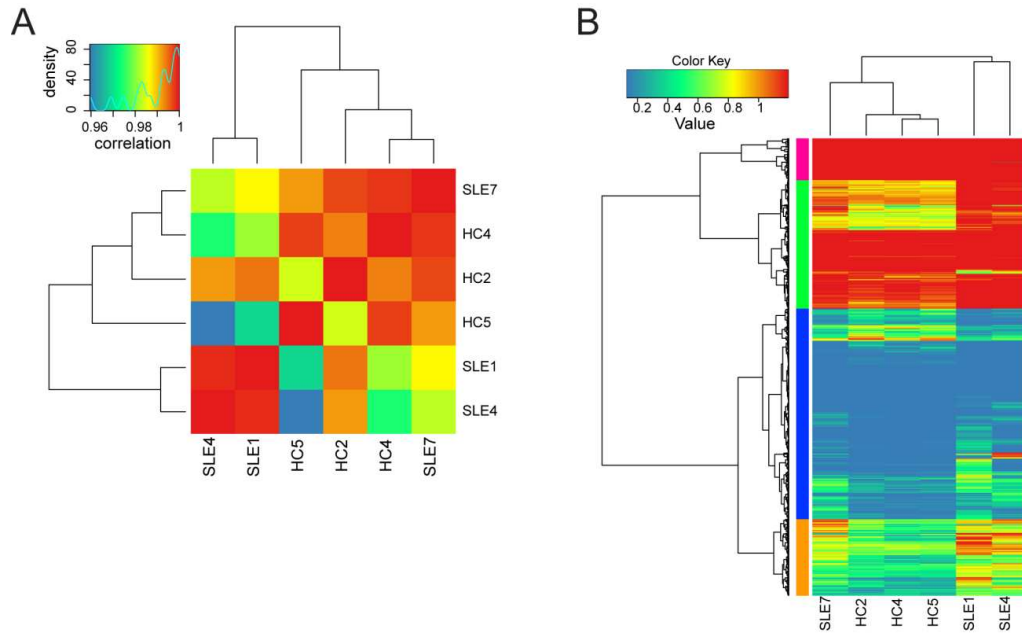

**Figure S2. SLE loops were identified by SLEDAI scores and gene expression profile.**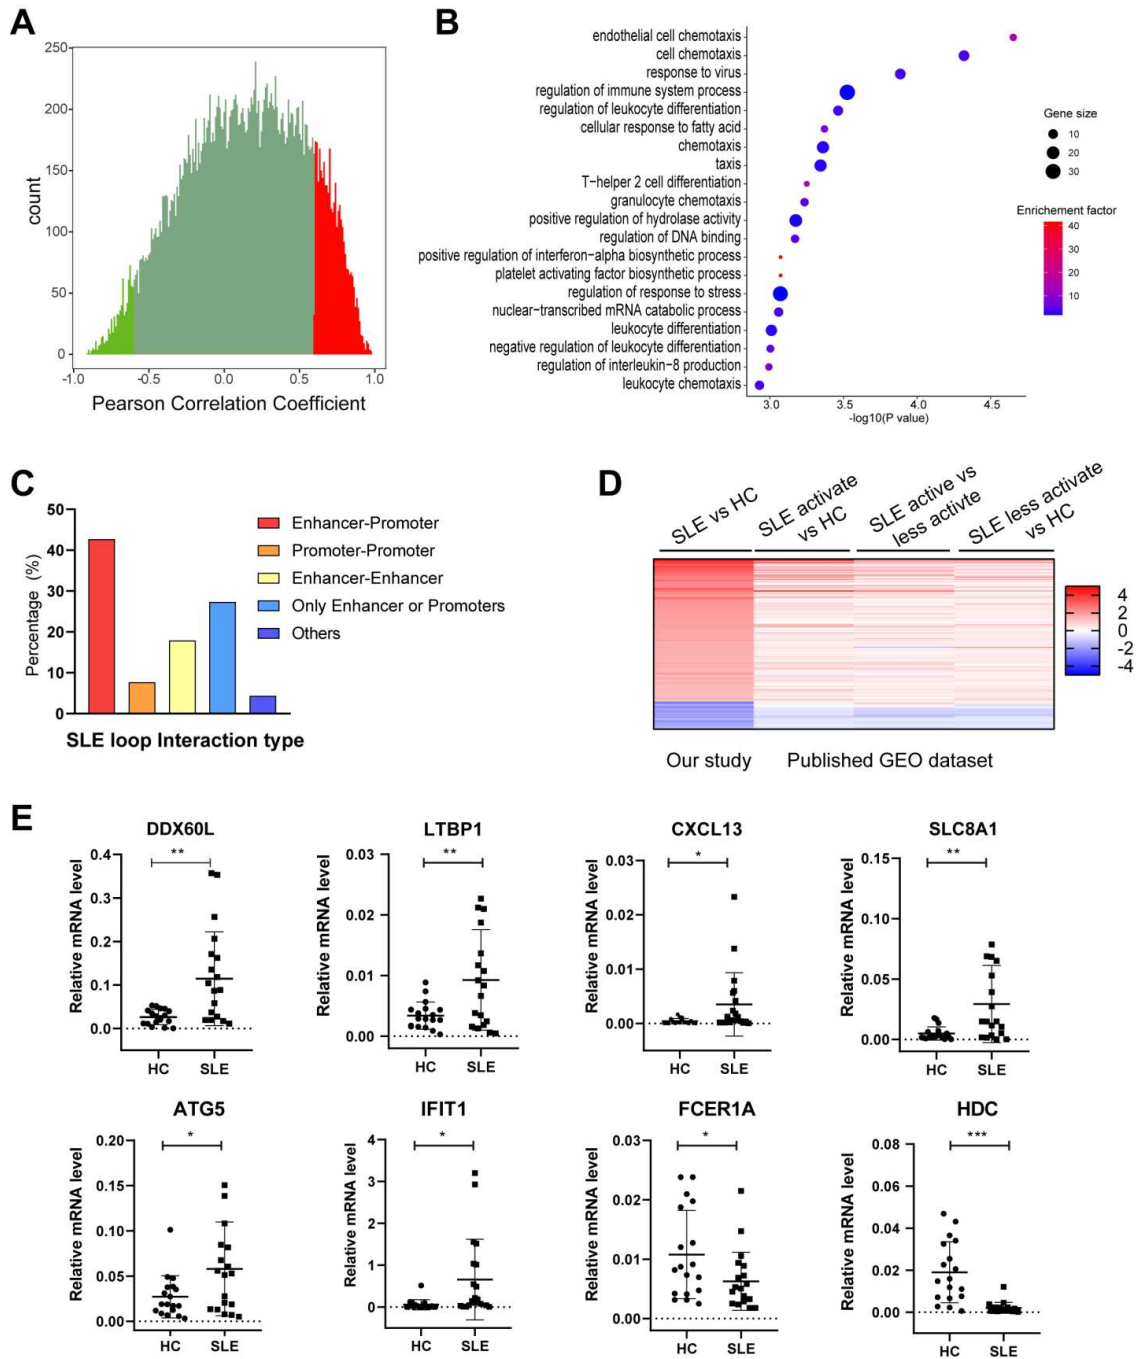

Figure S3. Long term interaction around gene *DDX60L*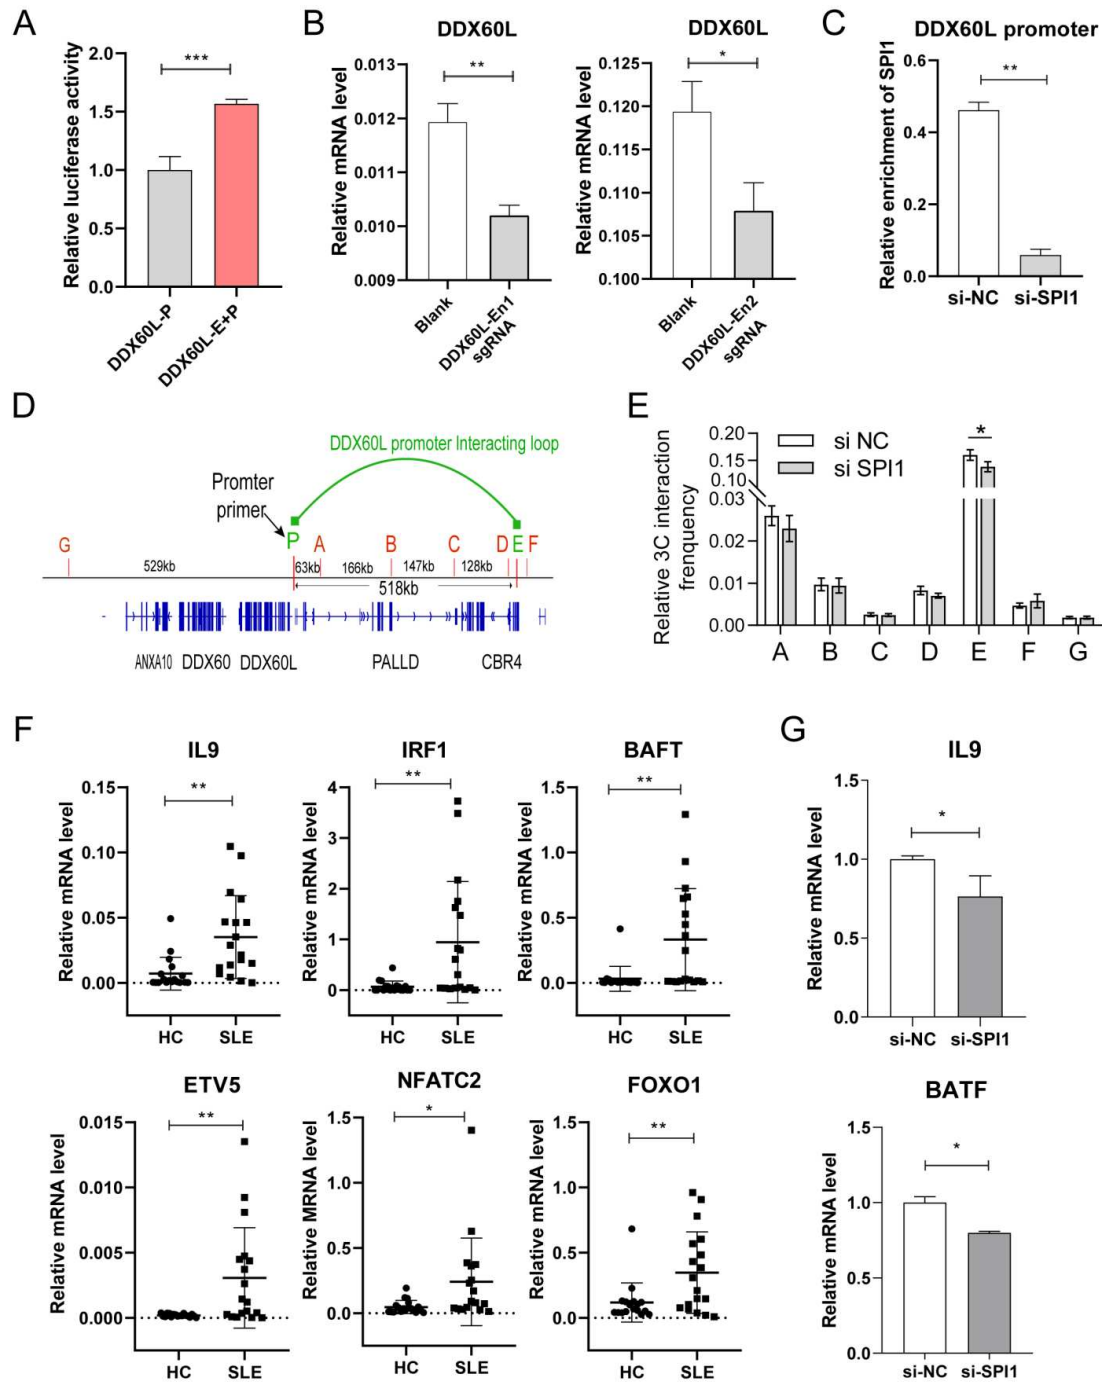

**Figure S4. Long term interaction around gene *CXCL13*.**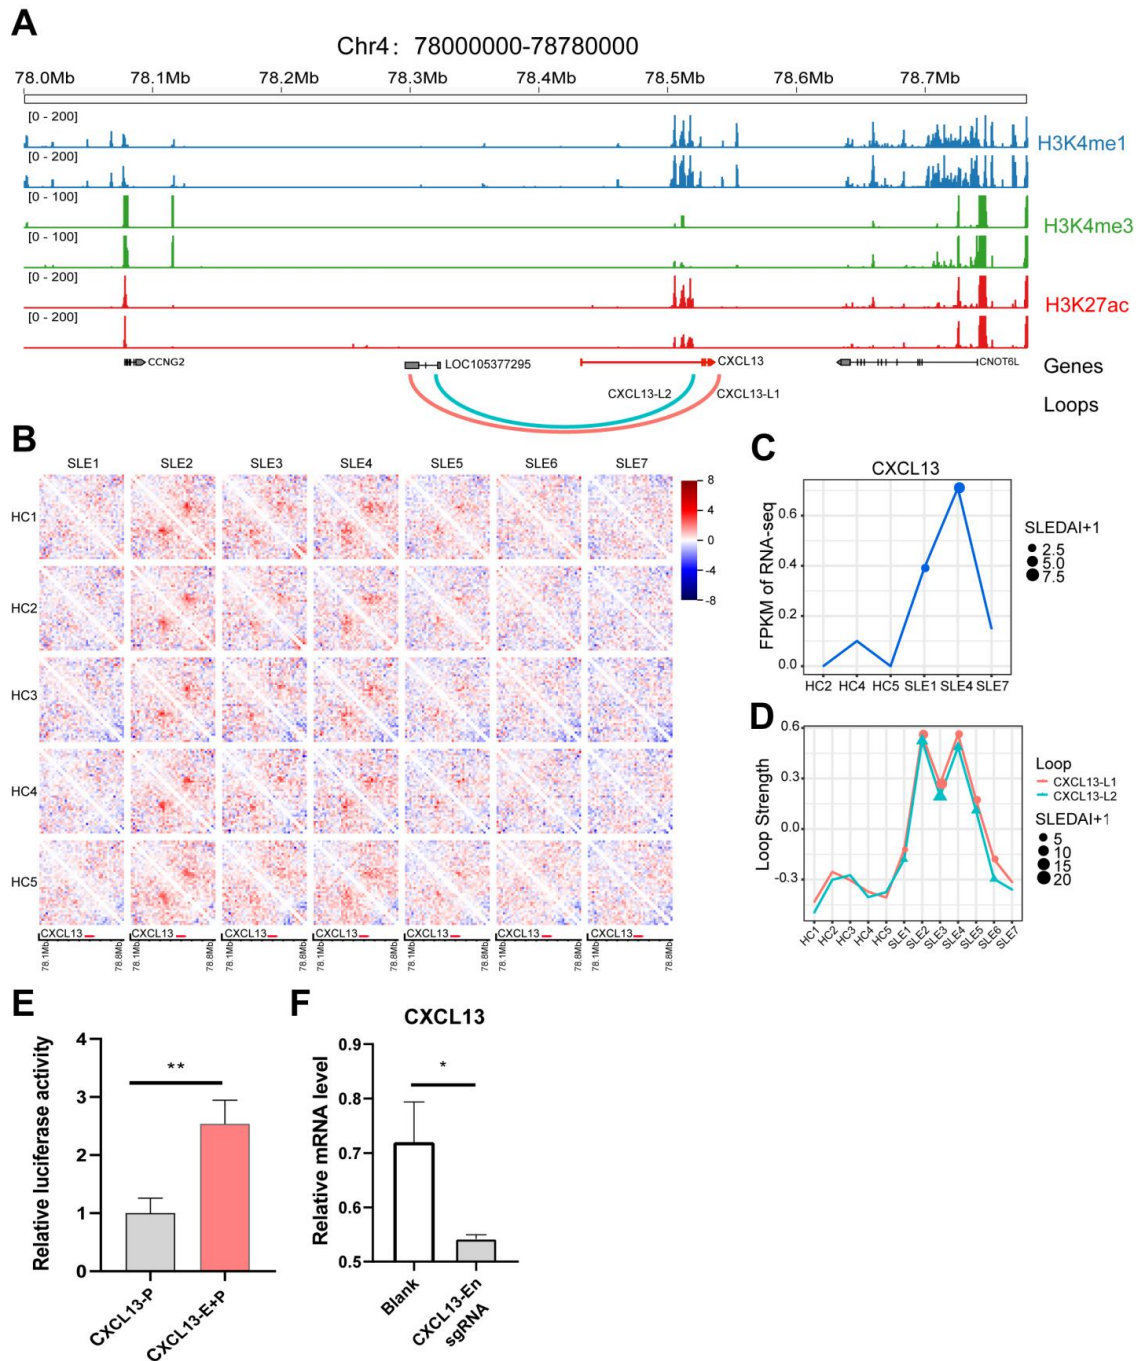

**Figure S5 Long term interaction around gene *SLC8A1-AS1*.**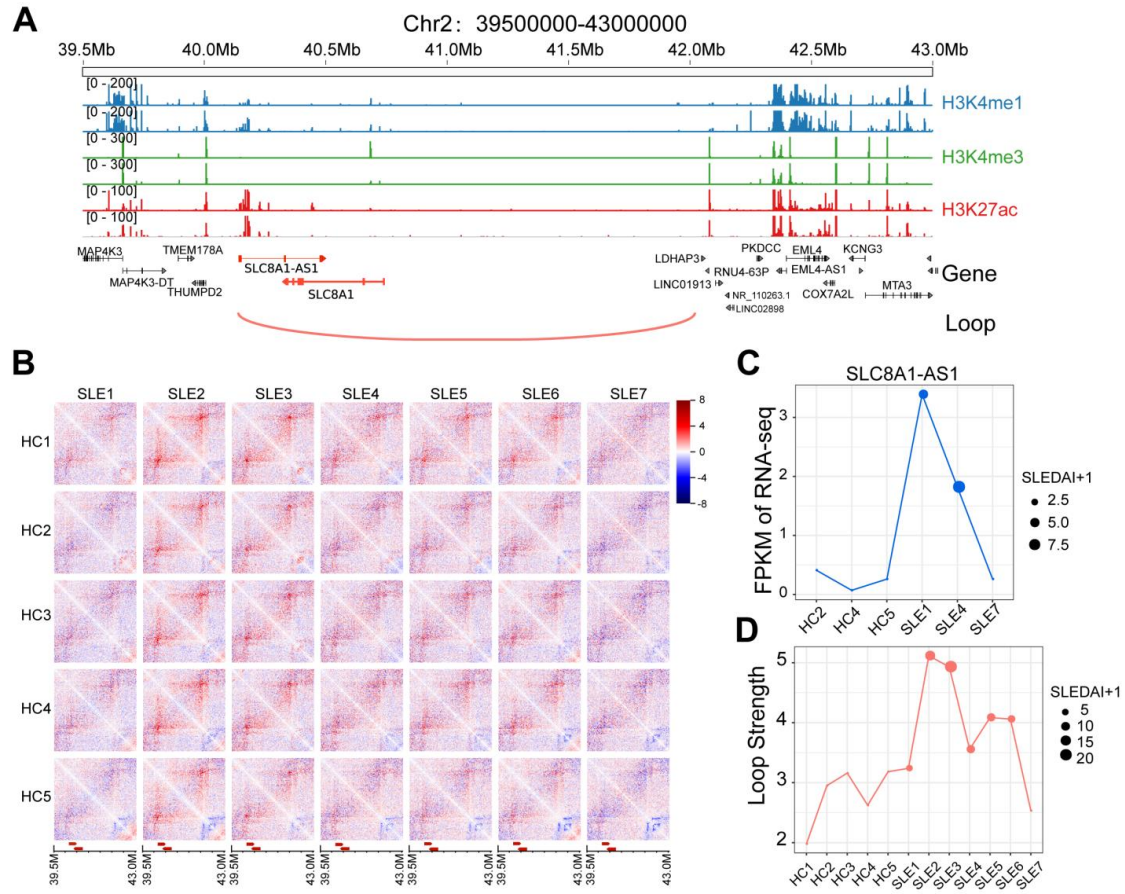

**Figure S6. Long term interaction around gene *DNAJB4*.**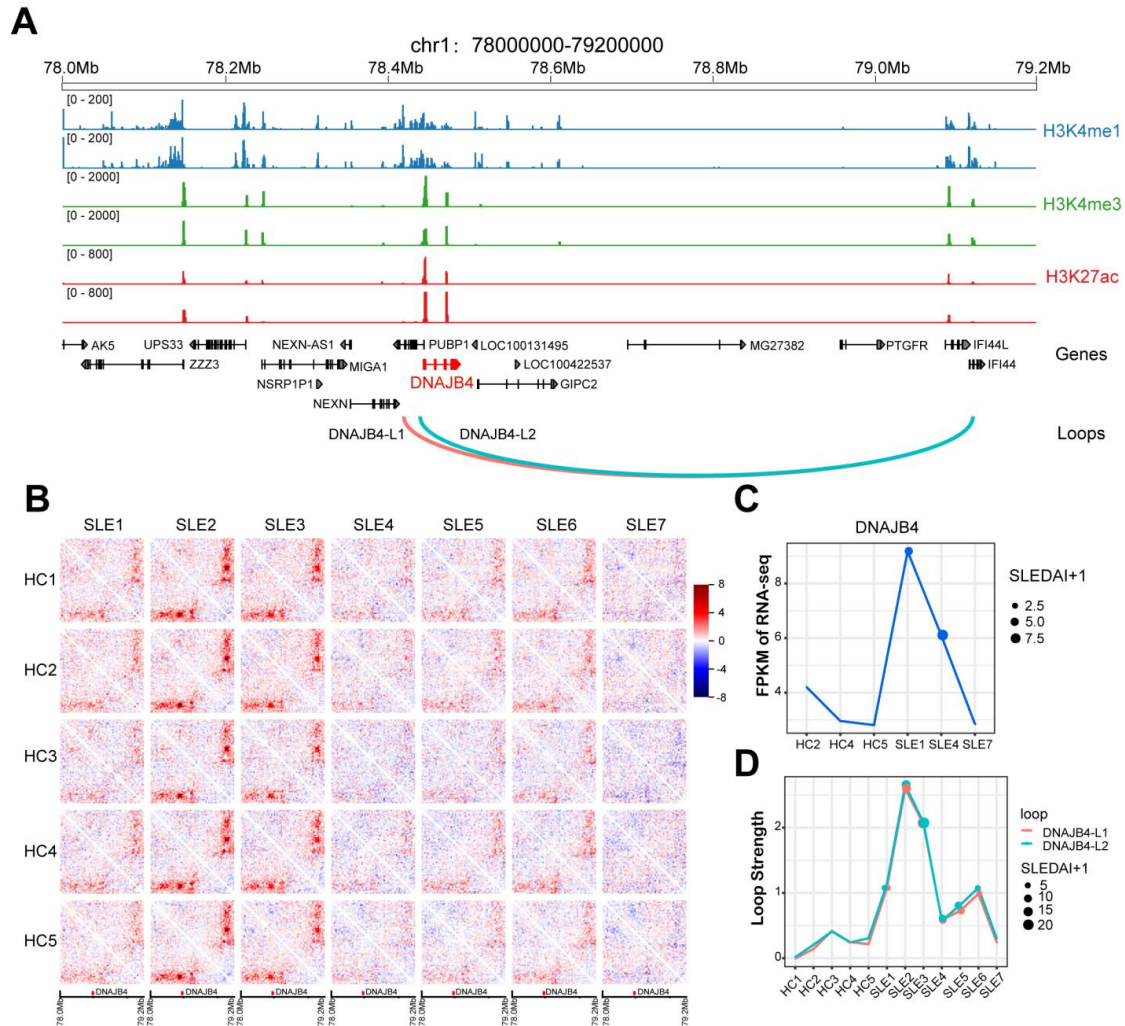

**Figure S7. Long term interaction around gene *CASP5*.**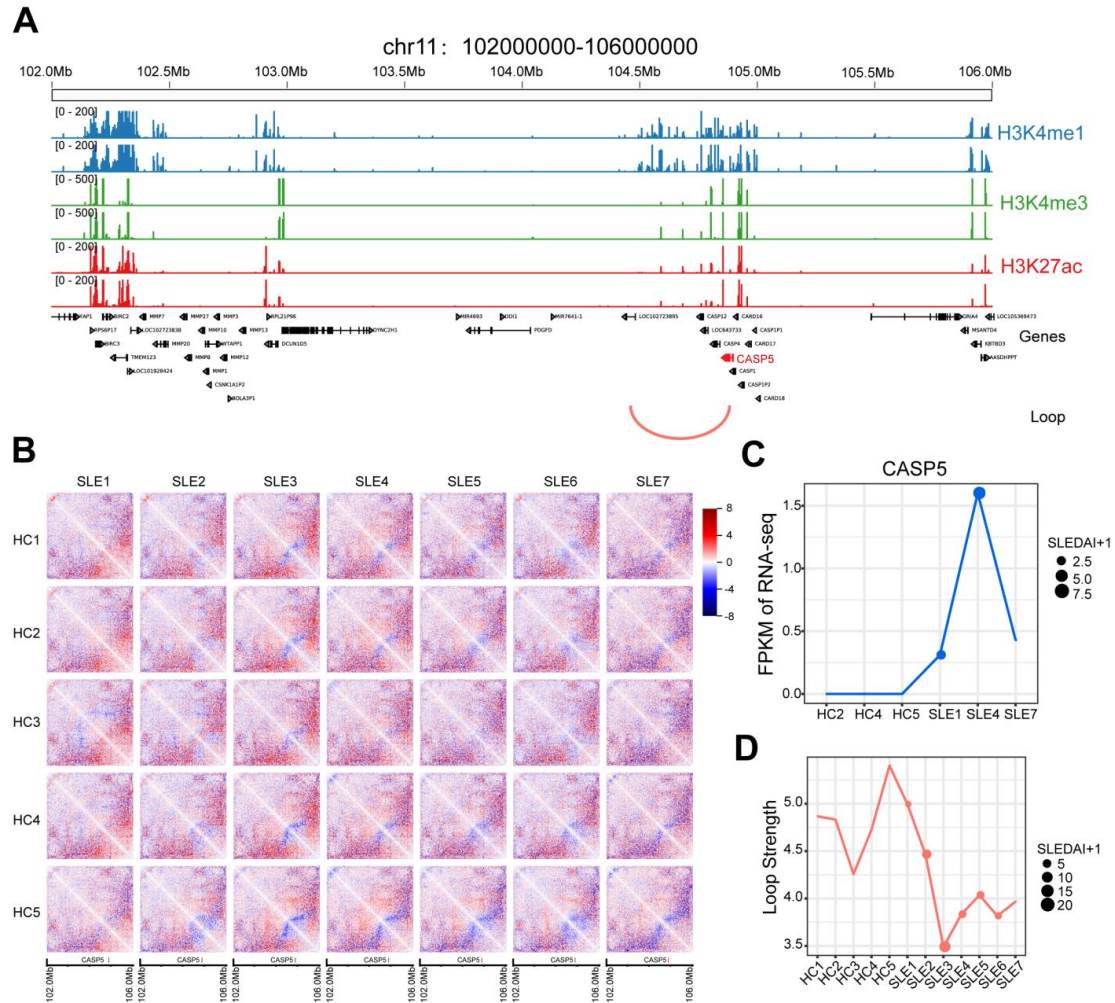





**Figure S9. Local genomic 3D features around SLE risk SNP rs2245214.**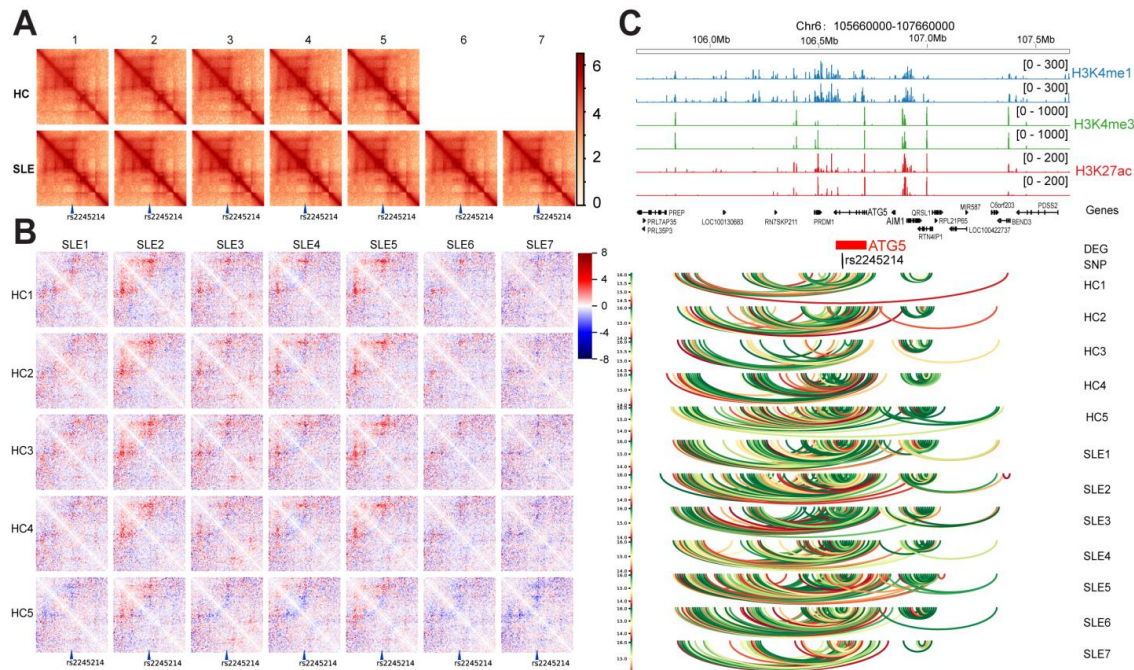

### Supplemental References

1. Hochberg MC. Updating the American College of Rheumatology revised criteria for the classification of systemic lupus erythematosus. *Arthritis and rheumatism* 1997;40(9):1725. doi: 10.1002/art.1780400928 [published Online First: 1997/10/27]
2. Bombardier C, Gladman DD, Urowitz MB, et al. Derivation of the SLEDAI. A disease activity index for lupus patients. The Committee on Prognosis Studies in SLE. *Arthritis and rheumatism* 1992;35(6):630-40. doi: 10.1002/art.1780350606 [published Online First: 1992/06/01]
3. Bolger AM, Lohse M, Usadel B. Trimmomatic: a flexible trimmer for Illumina sequence data. *Bioinformatics (Oxford, England)* 2014;30(15):2114-20. doi: 10.1093/bioinformatics/btu170 [published Online First: 2014/04/04]
4. Imakaev M, Fudenberg G, McCord RP, et al. Iterative correction of Hi-C data reveals hallmarks of chromosome organization. *Nature methods* 2012;9(10):999-1003. doi: 10.1038/nmeth.2148 [published Online First: 2012/09/04]
5. Zheng X, Zheng Y. CscoreTool: fast Hi-C compartment analysis at high resolution. *Bioinformatics (Oxford, England)* 2018;34(9):1568-70. doi: 10.1093/bioinformatics/btx802 [published Online First: 2017/12/16]
6. Crane E, Bian Q, McCord RP, et al. Condensin-driven remodelling of X chromosome topology during dosage compensation. *Nature* 2015;523(7559):240-4. doi: 10.1038/nature14450 [published Online First: 2015/06/02]
7. Ay F, Bailey TL, Noble WS. Statistical confidence estimation for Hi-C data reveals regulatory chromatin contacts. *Genome research* 2014;24(6):999-1011. doi: 10.1101/gr.160374.113 [published Online First: 2014/02/07]
8. Roayaei Ardakany A, Gezer HT, Lonardi S, et al. Mustache: multi-scale detection of chromatin loops from Hi-C and Micro-C maps using scale-space representation. *Genome biology* 2020;21(1):256. doi: 10.1186/s13059-020-02167-0 [published Online First: 2020/10/02]
9. Kim D, Paggi JM, Park C, et al. Graph-based genome alignment and genotyping with HISAT2 and HISAT-genotype. *Nature biotechnology* 2019;37(8):907-15. doi: 10.1038/s41587-019-0201-4 [published Online First: 2019/08/04]
10. Love MI, Huber W, Anders S. Moderated estimation of fold change and dispersion for RNA-seq data with DESeq2. *Genome biology* 2014;15(12):550. doi: 10.1186/s13059-014-0550-8 [published Online First: 2014/12/18]
11. Yu G, Wang LG, Han Y, et al. clusterProfiler: an R package for comparing biological themes among gene clusters. *OmicS : a journal of integrative biology* 2012;16(5):284-7. doi: 10.1089/omi.2011.0118 [published Online First: 2012/03/30]
12. Zhang Y, Liu T, Meyer CA, et al. Model-based analysis of ChIP-Seq (MACS). *Genome biology* 2008;9(9):R137. doi: 10.1186/gb-2008-9-9-r137 [published Online First: 2008/09/19]
13. Li Z, Schulz MH, Look T, et al. Identification of transcription factor binding sites using ATAC-seq. *Genome biology* 2019;20(1):45. doi: 10.1186/s13059-019-1642-2 [published Online First: 2019/02/28]
14. Hagège H, Klous P, Braem C, et al. Quantitative analysis of chromosome conformation capture assays (3C-qPCR). *Nature protocols* 2007;2(7):1722-33. doi: 10.1038/nprot.2007.243 [published Online First: 2007/07/21]

15. Zhao M, Tan Y, Peng Q, et al. IL-6/STAT3 pathway induced deficiency of RFX1 contributes to Th17-dependent autoimmune diseases via epigenetic regulation. *Nature communications* 2018;9(1):583. doi: 10.1038/s41467-018-02890-0 [published Online First: 2018/02/10]
