# Supplementary material for: 3D genome alterations in T cells associated with disease activity of systemic lupus erythematosus
Source: HighWire-hosted journal article supplement (doi:10.1136/ard-2022-222653), 2022-09-01
Supplement: ard-2022-222653supp003_data_supplement.xlsx [file ard-2022-222653supp003_data_supplement.xlsx]

## Sheet: Table S4-1
Table S4. loops that strength corrlelation with clinical parameters of SLE patients
Table S4-1. loops that strength corrlelation with C3 level of SLE patients
chrA	start	end	chrB	start	end	The correlation coefficient
10	17640001	17660000	10	18380001	18400000	-0.651247
10	17060001	17080000	10	17260001	17280000	-0.673691
10	17060001	17080000	10	17240001	17260000	-0.61008
10	17040001	17060000	10	17260001	17280000	-0.693079
10	16880001	16900000	10	17460001	17480000	-0.831177
10	16880001	16900000	10	17280001	17300000	-0.904864
10	16860001	16880000	10	17460001	17480000	-0.903366
10	16860001	16880000	10	17280001	17300000	-0.917554
10	15900001	15920000	10	17640001	17660000	-0.811132
10	15000001	15020000	10	15140001	15160000	-0.866855
10	15000001	15020000	10	15120001	15140000	-0.844379
10	14560001	14580000	10	15000001	15020000	-0.829697
10	14560001	14580000	10	14980001	15000000	-0.833668
10	14560001	14580000	10	14860001	14880000	-0.683185
10	14540001	14560000	10	15140001	15160000	-0.763124
10	14540001	14560000	10	15000001	15020000	-0.899627
10	14540001	14560000	10	14980001	15000000	-0.91761
10	14540001	14560000	10	14860001	14880000	-0.728617
10	14520001	14540000	10	15020001	15040000	-0.889682
10	13400001	13420000	10	13820001	13840000	-0.79953
10	134140001	134160000	10	135100001	135120000	-0.821905
10	13200001	13220000	10	13340001	13360000	-0.663254
10	13200001	13220000	10	13320001	13340000	-0.635915
10	13180001	13200000	10	13340001	13360000	-0.680988
10	129680001	129700000	10	129860001	129880000	0.690633
10	129680001	129700000	10	129840001	129860000	0.857253
10	126280001	126300000	10	126420001	126440000	-0.666102
10	126220001	126240000	10	126600001	126620000	-0.631218
10	126220001	126240000	10	126500001	126520000	-0.604254
10	126200001	126220000	10	126500001	126520000	-0.621159
10	126160001	126180000	10	126600001	126620000	-0.659338
10	126100001	126120000	10	126600001	126620000	-0.636323
10	125740001	125760000	10	126080001	126100000	-0.830698
10	125740001	125760000	10	126060001	126080000	-0.832728
10	125340001	125360000	10	126060001	126080000	-0.730719
10	125320001	125340000	10	126060001	126080000	-0.699818
10	124880001	124900000	10	125320001	125340000	-0.821719
10	124880001	124900000	10	125300001	125320000	-0.804083
10	124840001	124860000	10	125300001	125320000	-0.872856
10	124800001	124820000	10	125320001	125340000	-0.845294
10	124800001	124820000	10	125300001	125320000	-0.895091
10	124780001	124800000	10	125320001	125340000	-0.673736
10	124780001	124800000	10	125300001	125320000	-0.691576
10	124700001	124720000	10	125320001	125340000	-0.603603
10	124040001	124060000	10	124300001	124320000	-0.825315
10	12300001	12320000	10	12760001	12780000	-0.900679
10	12300001	12320000	10	12700001	12720000	-0.887857
10	12300001	12320000	10	12680001	12700000	-0.88247
10	12280001	12300000	10	12740001	12760000	-0.925778
10	12280001	12300000	10	12720001	12740000	-0.927097
10	12280001	12300000	10	12700001	12720000	-0.924106
10	12280001	12300000	10	12680001	12700000	-0.918364
10	12260001	12280000	10	12900001	12920000	-0.631545
10	12260001	12280000	10	12760001	12780000	-0.94631
10	12220001	12240000	10	13380001	13400000	-0.948249
10	120960001	120980000	10	121280001	121300000	-0.614773
10	120940001	120960000	10	121280001	121300000	-0.659583
10	120940001	120960000	10	121220001	121240000	-0.693485
10	11940001	11960000	10	12740001	12760000	-0.659084
10	119300001	119320000	10	119980001	120000000	-0.886772
10	119260001	119280000	10	120200001	120220000	-0.803585
10	119260001	119280000	10	120180001	120200000	-0.766374
10	119260001	119280000	10	120160001	120180000	-0.713809
10	119260001	119280000	10	120000001	120020000	-0.868982
10	119240001	119260000	10	120200001	120220000	-0.800442
10	119240001	119260000	10	120180001	120200000	-0.761493
10	119240001	119260000	10	120000001	120020000	-0.853322
10	119120001	119140000	10	120080001	120100000	-0.830574
10	1160001	1180000	10	3080001	3100000	-0.60675
10	116320001	116340000	10	116460001	116480000	-0.617453
10	116300001	116320000	10	116560001	116580000	-0.693576
10	116300001	116320000	10	116540001	116560000	-0.771189
10	116300001	116320000	10	116460001	116480000	-0.658459
10	116280001	116300000	10	116540001	116560000	-0.798969
10	116240001	116260000	10	116580001	116600000	-0.852889
10	116240001	116260000	10	116440001	116460000	-0.600012
10	116220001	116240000	10	116560001	116580000	-0.928432
10	116200001	116220000	10	116560001	116580000	-0.897341
10	11560001	11580000	10	11780001	11800000	-0.633849
10	115600001	115620000	10	116580001	116600000	-0.96155
10	11540001	11560000	10	11780001	11800000	-0.678632
10	114220001	114240000	10	115140001	115160000	-0.657092
10	114220001	114240000	10	115120001	115140000	-0.664815
10	114200001	114220000	10	115140001	115160000	-0.640406
10	112380001	112400000	10	113340001	113360000	-0.657
10	112360001	112380000	10	113900001	113920000	-0.680379
10	112340001	112360000	10	113900001	113920000	-0.751102
10	111760001	111780000	10	111840001	111860000	-0.620363
10	111740001	111760000	10	111840001	111860000	-0.633913
10	111640001	111660000	10	111860001	111880000	-0.617456
10	107540001	107560000	10	107720001	107740000	0.682102
10	104600001	104620000	10	105100001	105120000	-0.817043
10	103980001	104000000	10	104340001	104360000	-0.799497
10	103960001	103980000	10	104340001	104360000	-0.775909
10	103920001	103940000	10	104340001	104360000	-0.828711
10	103580001	103600000	10	103860001	103880000	-0.707528
10	102960001	102980000	10	103320001	103340000	-0.636169
10	102800001	102820000	10	103540001	103560000	-0.725886
10	102300001	102320000	10	102760001	102780000	-0.613175
10	102100001	102120000	10	102260001	102280000	-0.757713
10	102080001	102100000	10	102260001	102280000	-0.749503
10	102020001	102040000	10	102280001	102300000	-0.897209
10	101180001	101200000	10	101480001	101500000	-0.685131
10	101180001	101200000	10	101360001	101380000	-0.610575
10	101160001	101180000	10	101460001	101480000	-0.615937
10	101160001	101180000	10	101360001	101380000	-0.68077
10	100300001	100320000	10	101020001	101040000	-0.743529
10	100220001	100240000	10	101000001	101020000	-0.656742
10	99420001	99440000	10	99880001	99900000	-0.63681
10	99080001	99100000	10	99180001	99200000	-0.675277
10	99040001	99060000	10	99160001	99180000	-0.621185
10	99040001	99060000	10	99120001	99140000	-0.628013
10	98340001	98360000	10	98580001	98600000	-0.830427
10	98320001	98340000	10	98600001	98620000	-0.903403
10	98320001	98340000	10	98580001	98600000	-0.921839
10	98160001	98180000	10	98580001	98600000	-0.853332
10	98140001	98160000	10	98960001	98980000	-0.803596
10	98140001	98160000	10	98800001	98820000	-0.62862
10	98140001	98160000	10	98780001	98800000	-0.638673
10	98140001	98160000	10	98760001	98780000	-0.727394
10	94340001	94360000	10	94600001	94620000	-0.648726
10	93960001	93980000	10	94040001	94060000	-0.609748
10	93860001	93880000	10	94180001	94200000	-0.67863
10	93840001	93860000	10	94180001	94200000	-0.685363
10	93140001	93160000	10	93660001	93680000	-0.621294
10	93060001	93080000	10	93660001	93680000	-0.783228
10	93040001	93060000	10	93660001	93680000	-0.738173
10	92840001	92860000	10	93000001	93020000	-0.606296
10	92780001	92800000	10	93000001	93020000	-0.683235
10	92760001	92780000	10	93000001	93020000	-0.717051
10	92700001	92720000	10	93000001	93020000	-0.790531
10	92660001	92680000	10	93000001	93020000	-0.711704
10	92640001	92660000	10	93680001	93700000	-0.825556
10	92640001	92660000	10	93660001	93680000	-0.73446
10	92640001	92660000	10	93020001	93040000	-0.798696
10	92640001	92660000	10	93000001	93020000	-0.79425
10	92620001	92640000	10	93660001	93680000	-0.671545
10	91560001	91580000	10	92580001	92600000	-0.855483
10	91560001	91580000	10	92520001	92540000	-0.879204
10	91540001	91560000	10	92620001	92640000	-0.912193
10	91540001	91560000	10	92600001	92620000	-0.886121
10	91540001	91560000	10	92560001	92580000	-0.931616
10	91540001	91560000	10	92520001	92540000	-0.91226
10	91200001	91220000	10	91320001	91340000	-0.635403
10	91160001	91180000	10	91320001	91340000	-0.854401
10	91120001	91140000	10	91320001	91340000	-0.765644
10	91080001	91100000	10	91160001	91180000	-0.724149
10	91040001	91060000	10	91140001	91160000	-0.720226
10	91020001	91040000	10	91460001	91480000	-0.652323
10	91020001	91040000	10	91440001	91460000	-0.677203
10	91020001	91040000	10	91320001	91340000	-0.785726
10	91020001	91040000	10	91140001	91160000	-0.700089
10	91000001	91020000	10	91460001	91480000	-0.6095
10	91000001	91020000	10	91320001	91340000	-0.807616
10	90780001	90800000	10	91320001	91340000	-0.709358
10	90780001	90800000	10	90960001	90980000	-0.799887
10	90760001	90780000	10	91320001	91340000	-0.722816
10	90760001	90780000	10	90960001	90980000	-0.897329
10	90700001	90720000	10	90960001	90980000	-0.937335
10	90680001	90700000	10	90960001	90980000	-0.954883
10	88160001	88180000	10	88280001	88300000	-0.716589
10	88160001	88180000	10	88260001	88280000	-0.70132
10	86400001	86420000	10	88040001	88060000	-0.630872
10	86300001	86320000	10	88120001	88140000	-0.772157
10	86280001	86300000	10	88120001	88140000	-0.75644
10	86120001	86140000	10	86280001	86300000	-0.815526
10	86100001	86120000	10	86280001	86300000	-0.86666
10	86020001	86040000	10	86300001	86320000	-0.910768
10	86020001	86040000	10	86280001	86300000	-0.936075
10	86020001	86040000	10	86120001	86140000	-0.796575
10	86020001	86040000	10	86100001	86120000	-0.831899
10	85900001	85920000	10	86280001	86300000	-0.804813
10	85900001	85920000	10	86100001	86120000	-0.670631
10	85900001	85920000	10	86080001	86100000	-0.634532
10	85880001	85900000	10	86300001	86320000	-0.686799
10	85880001	85900000	10	86280001	86300000	-0.707712
10	84840001	84860000	10	84960001	84980000	0.764441
10	84520001	84540000	10	85100001	85120000	0.656724
10	8380001	8400000	10	8460001	8480000	0.7123
10	83960001	83980000	10	84100001	84120000	0.704121
10	8360001	8380000	10	8460001	8480000	0.630302
10	80060001	80080000	10	80800001	80820000	-0.787363
10	79940001	79960000	10	80940001	80960000	-0.913433
10	79840001	79860000	10	80520001	80540000	-0.81288
10	79820001	79840000	10	80400001	80420000	-0.620146
10	79800001	79820000	10	81060001	81080000	-0.936153
10	79800001	79820000	10	81040001	81060000	-0.949545
10	79800001	79820000	10	80960001	80980000	-0.927533
10	79800001	79820000	10	80940001	80960000	-0.926121
10	79800001	79820000	10	80820001	80840000	-0.904067
10	79800001	79820000	10	80060001	80080000	-0.843695
10	79800001	79820000	10	80040001	80060000	-0.846629
10	79780001	79800000	10	81100001	81120000	-0.950023
10	79780001	79800000	10	81080001	81100000	-0.942171
10	79780001	79800000	10	81060001	81080000	-0.958679
10	79780001	79800000	10	80960001	80980000	-0.928938
10	79780001	79800000	10	80840001	80860000	-0.927234
10	79780001	79800000	10	80820001	80840000	-0.937068
10	79780001	79800000	10	80800001	80820000	-0.924658
10	79780001	79800000	10	80060001	80080000	-0.835893
10	79780001	79800000	10	80040001	80060000	-0.781304
10	78440001	78460000	10	78600001	78620000	0.855132
10	78380001	78400000	10	78580001	78600000	0.871271
10	78360001	78380000	10	78480001	78500000	0.745972
10	76160001	76180000	10	76840001	76860000	-0.612851
10	76020001	76040000	10	76840001	76860000	-0.81274
10	76020001	76040000	10	76760001	76780000	-0.74003
10	76000001	76020000	10	76980001	77000000	-0.740278
10	76000001	76020000	10	76860001	76880000	-0.806838
10	76000001	76020000	10	76840001	76860000	-0.820076
10	76000001	76020000	10	76780001	76800000	-0.775863
10	75920001	75940000	10	76860001	76880000	-0.672111
10	75900001	75920000	10	76980001	77000000	-0.721071
10	75880001	75900000	10	76960001	76980000	-0.829344
10	75860001	75880000	10	76980001	77000000	-0.790268
10	75020001	75040000	10	75380001	75400000	-0.754535
10	74160001	74180000	10	74760001	74780000	-0.623967
10	74140001	74160000	10	74780001	74800000	-0.60473
10	74120001	74140000	10	74920001	74940000	-0.756994
10	74120001	74140000	10	74900001	74920000	-0.732535
10	74120001	74140000	10	74860001	74880000	-0.710275
10	74120001	74140000	10	74820001	74840000	-0.628634
10	74120001	74140000	10	74800001	74820000	-0.612068
10	74100001	74120000	10	74920001	74940000	-0.754975
10	73140001	73160000	10	73560001	73580000	-0.687309
10	73140001	73160000	10	73460001	73480000	-0.773089
10	73100001	73120000	10	73560001	73580000	-0.747311
10	73080001	73100000	10	73560001	73580000	-0.724044
10	73060001	73080000	10	73560001	73580000	-0.640168
10	73060001	73080000	10	73460001	73480000	-0.624101
10	71980001	72000000	10	72120001	72140000	-0.605418
10	71960001	71980000	10	72120001	72140000	-0.623954
10	70980001	71000000	10	71140001	71160000	-0.717352
10	70280001	70300000	10	70480001	70500000	-0.700528
10	69640001	69660000	10	69820001	69840000	-0.616846
10	69620001	69640000	10	70100001	70120000	-0.821729
10	69620001	69640000	10	70080001	70100000	-0.797583
10	69620001	69640000	10	69920001	69940000	-0.713315
10	69620001	69640000	10	69900001	69920000	-0.780477
10	69620001	69640000	10	69820001	69840000	-0.722865
10	69600001	69620000	10	70080001	70100000	-0.800136
10	69600001	69620000	10	69900001	69920000	-0.825476
10	69320001	69340000	10	69540001	69560000	0.853972
10	66860001	66880000	10	66940001	66960000	0.738163
10	6520001	6540000	10	6620001	6640000	0.624079
10	6500001	6520000	10	6640001	6660000	0.604256
10	64980001	65000000	10	65260001	65280000	-0.771573
10	64960001	64980000	10	65380001	65400000	-0.757856
10	64940001	64960000	10	65460001	65480000	-0.947701
10	64940001	64960000	10	65380001	65400000	-0.7965
10	64920001	64940000	10	65480001	65500000	-0.905252
10	64920001	64940000	10	65460001	65480000	-0.955604
10	64360001	64380000	10	65480001	65500000	-0.604225
10	64360001	64380000	10	64900001	64920000	-0.709414
10	64360001	64380000	10	64880001	64900000	-0.733796
10	64340001	64360000	10	65480001	65500000	-0.703171
10	64340001	64360000	10	65460001	65480000	-0.718912
10	64340001	64360000	10	64900001	64920000	-0.698186
10	64340001	64360000	10	64880001	64900000	-0.709153
10	64220001	64240000	10	64860001	64880000	-0.602048
10	63660001	63680000	10	64000001	64020000	-0.620292
10	63660001	63680000	10	63980001	64000000	-0.701887
10	63640001	63660000	10	64000001	64020000	-0.637733
10	63640001	63660000	10	63980001	64000000	-0.722857
10	6140001	6160000	10	6440001	6460000	-0.970251
10	61380001	61400000	10	62420001	62440000	-0.646988
10	61380001	61400000	10	62400001	62420000	-0.670393
10	61380001	61400000	10	62380001	62400000	-0.664998
10	61380001	61400000	10	61800001	61820000	-0.706207
10	61380001	61400000	10	61780001	61800000	-0.642305
10	61360001	61380000	10	62400001	62420000	-0.615203
10	59940001	59960000	10	60140001	60160000	-0.701059
10	59940001	59960000	10	60040001	60060000	-0.833449
10	59920001	59940000	10	60160001	60180000	-0.70055
10	59920001	59940000	10	60040001	60060000	-0.785589
10	58180001	58200000	10	58280001	58300000	0.776755
10	55660001	55680000	10	55900001	55920000	0.756772
10	55640001	55660000	10	55920001	55940000	0.925316
10	55540001	55560000	10	55680001	55700000	0.698335
10	55500001	55520000	10	55620001	55640000	0.623169
10	55240001	55260000	10	55660001	55680000	0.710138
10	55120001	55140000	10	55480001	55500000	0.718579
10	55120001	55140000	10	55240001	55260000	0.68212
10	54860001	54880000	10	55260001	55280000	0.797445
10	54820001	54840000	10	55120001	55140000	0.744883
10	54600001	54620000	10	55480001	55500000	0.737793
10	54600001	54620000	10	54980001	55000000	0.644582
10	54360001	54380000	10	55180001	55200000	0.852315
10	53340001	53360000	10	53840001	53860000	-0.799579
10	52760001	52780000	10	53980001	54000000	-0.6884
10	52760001	52780000	10	53960001	53980000	-0.780121
10	52760001	52780000	10	53940001	53960000	-0.75208
10	52740001	52760000	10	53980001	54000000	-0.716764
10	52740001	52760000	10	53960001	53980000	-0.827188
10	50180001	50200000	10	50360001	50380000	0.747947
10	49500001	49520000	10	50720001	50740000	-0.694588
10	4880001	4900000	10	5420001	5440000	-0.623675
10	4860001	4880000	10	5460001	5480000	-0.623709
10	45960001	45980000	10	46140001	46160000	-0.727295
10	45960001	45980000	10	46120001	46140000	-0.688902
10	44180001	44200000	10	44840001	44860000	-0.630097
10	44160001	44180000	10	45360001	45380000	-0.667429
10	44160001	44180000	10	45340001	45360000	-0.683934
10	44140001	44160000	10	45460001	45480000	-0.645236
10	43860001	43880000	10	43940001	43960000	-0.731217
10	43660001	43680000	10	43960001	43980000	-0.698807
10	43640001	43660000	10	43940001	43960000	-0.65251
10	43620001	43640000	10	43940001	43960000	-0.691009
10	38140001	38160000	10	38380001	38400000	-0.817702
10	35520001	35540000	10	35820001	35840000	-0.81375
10	35480001	35500000	10	35620001	35640000	-0.711489
10	35400001	35420000	10	35620001	35640000	-0.679357
10	35400001	35420000	10	35500001	35520000	-0.780101
10	35400001	35420000	10	35480001	35500000	-0.790578
10	35380001	35400000	10	35840001	35860000	-0.722377
10	35380001	35400000	10	35820001	35840000	-0.702478
10	35380001	35400000	10	35800001	35820000	-0.690544
10	35380001	35400000	10	35620001	35640000	-0.639634
10	35380001	35400000	10	35500001	35520000	-0.790107
10	35280001	35300000	10	35500001	35520000	-0.844074
10	33620001	33640000	10	34920001	34940000	-0.629159
10	33600001	33620000	10	34920001	34940000	-0.628322
10	33600001	33620000	10	34900001	34920000	-0.610593
10	33480001	33500000	10	34920001	34940000	-0.727382
10	33480001	33500000	10	34900001	34920000	-0.72466
10	33460001	33480000	10	34920001	34940000	-0.776306
10	33360001	33380000	10	34920001	34940000	-0.61987
10	32320001	32340000	10	32620001	32640000	-0.663405
10	31600001	31620000	10	32040001	32060000	-0.96862
10	31320001	31340000	10	32080001	32100000	-0.855396
10	31320001	31340000	10	32060001	32080000	-0.865268
10	31320001	31340000	10	31600001	31620000	-0.876739
10	31300001	31320000	10	32060001	32080000	-0.82086
10	31300001	31320000	10	32040001	32060000	-0.861584
10	31300001	31320000	10	31600001	31620000	-0.842867
10	31060001	31080000	10	32060001	32080000	-0.791834
10	31040001	31060000	10	32060001	32080000	-0.752101
10	31020001	31040000	10	32080001	32100000	-0.731684
10	31020001	31040000	10	32060001	32080000	-0.759735
10	30980001	31000000	10	32340001	32360000	-0.78133
10	30980001	31000000	10	32320001	32340000	-0.688658
10	30980001	31000000	10	32080001	32100000	-0.649122
10	30960001	30980000	10	32080001	32100000	-0.682435
10	30700001	30720000	10	30820001	30840000	-0.675815
10	30680001	30700000	10	30880001	30900000	-0.798147
10	30680001	30700000	10	30860001	30880000	-0.779298
10	30680001	30700000	10	30820001	30840000	-0.72649
10	30660001	30680000	10	30940001	30960000	-0.645777
10	30660001	30680000	10	30880001	30900000	-0.771401
10	30300001	30320000	10	30840001	30860000	-0.696896
10	30280001	30300000	10	30860001	30880000	-0.766337
10	30280001	30300000	10	30840001	30860000	-0.731515
10	30280001	30300000	10	30660001	30680000	-0.758212
10	30280001	30300000	10	30640001	30660000	-0.791384
10	30280001	30300000	10	30520001	30540000	-0.832314
10	28940001	28960000	10	29700001	29720000	-0.761466
10	28560001	28580000	10	28660001	28680000	-0.698769
10	28540001	28560000	10	28660001	28680000	-0.774124
10	28040001	28060000	10	28520001	28540000	-0.714704
10	28040001	28060000	10	28500001	28520000	-0.757676
10	28040001	28060000	10	28460001	28480000	-0.794755
10	28020001	28040000	10	28520001	28540000	-0.7105
10	28020001	28040000	10	28480001	28500000	-0.703281
10	27800001	27820000	10	28820001	28840000	-0.813438
10	27740001	27760000	10	28660001	28680000	-0.700698
10	27720001	27740000	10	28680001	28700000	-0.70517
10	27720001	27740000	10	28660001	28680000	-0.702762
10	27520001	27540000	10	28820001	28840000	-0.861314
10	27520001	27540000	10	27780001	27800000	-0.704075
10	27500001	27520000	10	27640001	27660000	-0.738818
10	27480001	27500000	10	27640001	27660000	-0.78078
10	27440001	27460000	10	27640001	27660000	-0.815045
10	27400001	27420000	10	28880001	28900000	-0.772761
10	27000001	27020000	10	27160001	27180000	-0.630693
10	26900001	26920000	10	27160001	27180000	-0.607893
10	26880001	26900000	10	26960001	26980000	-0.679892
10	26740001	26760000	10	28620001	28640000	-0.790637
10	26720001	26740000	10	27160001	27180000	-0.684974
10	26620001	26640000	10	27180001	27200000	-0.774206
10	26620001	26640000	10	27160001	27180000	-0.738517
10	26620001	26640000	10	27000001	27020000	-0.77977
10	26620001	26640000	10	26980001	27000000	-0.850632
10	26620001	26640000	10	26960001	26980000	-0.848003
10	26620001	26640000	10	26920001	26940000	-0.895864
10	26600001	26620000	10	27160001	27180000	-0.775705
10	23600001	23620000	10	24480001	24500000	-0.780333
10	23580001	23600000	10	24480001	24500000	-0.784412
10	23540001	23560000	10	24480001	24500000	-0.831464
10	23440001	23460000	10	24500001	24520000	-0.844489
10	23440001	23460000	10	24480001	24500000	-0.897125
10	23440001	23460000	10	24460001	24480000	-0.924619
10	22860001	22880000	10	23260001	23280000	-0.652911
10	22840001	22860000	10	23260001	23280000	-0.675937
10	22520001	22540000	10	23260001	23280000	-0.659189
10	22300001	22320000	10	22700001	22720000	-0.697482
10	22300001	22320000	10	22520001	22540000	-0.720739
10	22280001	22300000	10	23280001	23300000	-0.742486
10	22280001	22300000	10	23260001	23280000	-0.705183
10	22280001	22300000	10	22860001	22880000	-0.803753
10	22280001	22300000	10	22840001	22860000	-0.735889
10	22280001	22300000	10	22720001	22740000	-0.689038
10	22280001	22300000	10	22700001	22720000	-0.674211
10	22280001	22300000	10	22520001	22540000	-0.703632
10	22280001	22300000	10	22500001	22520000	-0.691059
10	22260001	22280000	10	23340001	23360000	-0.636077
10	21820001	21840000	10	22000001	22020000	-0.762021
10	21800001	21820000	10	22960001	22980000	-0.741795
10	21800001	21820000	10	22720001	22740000	-0.747889
10	21800001	21820000	10	22620001	22640000	-0.718139
10	21800001	21820000	10	22600001	22620000	-0.698478
10	21800001	21820000	10	22000001	22020000	-0.772507
10	21780001	21800000	10	22260001	22280000	-0.773074
10	21780001	21800000	10	22240001	22260000	-0.789162
10	21760001	21780000	10	23320001	23340000	-0.603567
10	21760001	21780000	10	23280001	23300000	-0.631807
10	21760001	21780000	10	22240001	22260000	-0.833449
9	19920001	19940000	9	21100001	21120000	-0.757933
9	19920001	19940000	9	21040001	21060000	-0.873222
9	19920001	19940000	9	20940001	20960000	-0.801866
9	19920001	19940000	9	20920001	20940000	-0.724334
9	19920001	19940000	9	20620001	20640000	-0.741133
9	19920001	19940000	9	20340001	20360000	-0.915545
9	19480001	19500000	9	21120001	21140000	-0.699333
9	19480001	19500000	9	20940001	20960000	-0.823525
9	19480001	19500000	9	20920001	20940000	-0.785163
9	19080001	19100000	9	19360001	19380000	-0.903593
9	19080001	19100000	9	19340001	19360000	-0.842686
9	19060001	19080000	9	19440001	19460000	-0.963702
9	19060001	19080000	9	19420001	19440000	-0.954413
9	19060001	19080000	9	19380001	19400000	-0.943074
9	19060001	19080000	9	19360001	19380000	-0.932072
9	19060001	19080000	9	19180001	19200000	-0.828679
9	19040001	19060000	9	19440001	19460000	-0.909156
9	1720001	1740000	9	2080001	2100000	-0.715417
9	1700001	1720000	9	2080001	2100000	-0.68069
9	1700001	1720000	9	2060001	2080000	-0.660596
9	15860001	15880000	9	17460001	17480000	-0.713734
9	15300001	15320000	9	15500001	15520000	-0.814225
9	15280001	15300000	9	15420001	15440000	-0.753047
9	15280001	15300000	9	15400001	15420000	-0.626754
9	15260001	15280000	9	15600001	15620000	-0.805048
9	15260001	15280000	9	15420001	15440000	-0.789291
9	15240001	15260000	9	15400001	15420000	-0.707334
9	15220001	15240000	9	15600001	15620000	-0.725307
9	15220001	15240000	9	15580001	15600000	-0.738068
9	15200001	15220000	9	15600001	15620000	-0.708229
9	15200001	15220000	9	15560001	15580000	-0.780239
9	15180001	15200000	9	15580001	15600000	-0.677088
9	14860001	14880000	9	15620001	15640000	-0.615901
9	14620001	14640000	9	15120001	15140000	-0.809005
9	14600001	14620000	9	15120001	15140000	-0.843212
9	140180001	140200000	9	140420001	140440000	-0.668037
9	139740001	139760000	9	139820001	139840000	0.66371
9	139680001	139700000	9	140120001	140140000	-0.811862
9	139680001	139700000	9	139940001	139960000	-0.775636
9	139680001	139700000	9	139920001	139940000	-0.814745
9	139660001	139680000	9	139920001	139940000	-0.805787
9	137120001	137140000	9	137540001	137560000	-0.805114
9	137100001	137120000	9	137300001	137320000	-0.899703
9	137020001	137040000	9	137320001	137340000	-0.93683
9	136060001	136080000	9	136340001	136360000	-0.858993
9	136040001	136060000	9	136340001	136360000	-0.794707
9	135900001	135920000	9	136340001	136360000	-0.80408
9	135860001	135880000	9	136340001	136360000	-0.849739
9	135380001	135400000	9	135680001	135700000	-0.827734
9	135380001	135400000	9	135660001	135680000	-0.818405
9	135360001	135380000	9	135680001	135700000	-0.783568
9	135320001	135340000	9	135680001	135700000	-0.826059
9	135280001	135300000	9	135840001	135860000	-0.764306
9	135280001	135300000	9	135660001	135680000	-0.789385
9	134380001	134400000	9	134600001	134620000	-0.896876
9	134360001	134380000	9	134600001	134620000	-0.859763
9	134240001	134260000	9	134600001	134620000	-0.659058
9	134220001	134240000	9	134600001	134620000	-0.62536
9	134040001	134060000	9	134340001	134360000	-0.681404
9	134040001	134060000	9	134320001	134340000	-0.701114
9	134020001	134040000	9	134340001	134360000	-0.751601
9	134020001	134040000	9	134320001	134340000	-0.782949
9	134000001	134020000	9	135260001	135280000	-0.653817
9	133040001	133060000	9	133760001	133780000	-0.629263
9	132600001	132620000	9	132820001	132840000	-0.753441
9	132460001	132480000	9	133240001	133260000	-0.743271
9	132060001	132080000	9	132340001	132360000	-0.605826
9	131900001	131920000	9	132380001	132400000	-0.827398
9	131900001	131920000	9	132360001	132380000	-0.795474
9	131880001	131900000	9	132540001	132560000	-0.740061
9	131880001	131900000	9	132380001	132400000	-0.834149
9	130540001	130560000	9	130660001	130680000	0.605696
9	130320001	130340000	9	130640001	130660000	-0.729
9	130300001	130320000	9	130640001	130660000	-0.751728
9	130280001	130300000	9	130640001	130660000	-0.79928
9	130260001	130280000	9	130480001	130500000	-0.729602
9	129700001	129720000	9	130640001	130660000	-0.637706
9	129700001	129720000	9	130180001	130200000	-0.605775
9	129700001	129720000	9	130160001	130180000	-0.683963
9	129700001	129720000	9	129960001	129980000	-0.785989
9	129700001	129720000	9	129940001	129960000	-0.7
9	129680001	129700000	9	130180001	130200000	-0.620402
9	128320001	128340000	9	128980001	129000000	-0.894324
9	128320001	128340000	9	128960001	128980000	-0.901402
9	127700001	127720000	9	127900001	127920000	-0.748642
9	127680001	127700000	9	127900001	127920000	-0.81809
9	127660001	127680000	9	128100001	128120000	-0.80456
9	127620001	127640000	9	127900001	127920000	-0.871996
9	127600001	127620000	9	127900001	127920000	-0.931589
9	127540001	127560000	9	128120001	128140000	-0.871968
9	127540001	127560000	9	127880001	127900000	-0.891161
9	127520001	127540000	9	128120001	128140000	-0.851371
9	125220001	125240000	9	126120001	126140000	-0.642364
9	125220001	125240000	9	125560001	125580000	-0.625637
9	125220001	125240000	9	125540001	125560000	-0.702087
9	125200001	125220000	9	125560001	125580000	-0.613182
9	125100001	125120000	9	125560001	125580000	-0.728912
9	125080001	125100000	9	125560001	125580000	-0.762361
9	125060001	125080000	9	125560001	125580000	-0.724457
9	125020001	125040000	9	125580001	125600000	-0.726804
9	124900001	124920000	9	125560001	125580000	-0.803293
9	124880001	124900000	9	125560001	125580000	-0.777263
9	124880001	124900000	9	125100001	125120000	-0.83092
9	124860001	124880000	9	125560001	125580000	-0.672564
9	124860001	124880000	9	125100001	125120000	-0.853541
9	124860001	124880000	9	125080001	125100000	-0.84595
9	124300001	124320000	9	124760001	124780000	-0.764559
9	123620001	123640000	9	123820001	123840000	-0.67497
9	123540001	123560000	9	123700001	123720000	-0.682768
9	123520001	123540000	9	123900001	123920000	-0.820918
9	123520001	123540000	9	123820001	123840000	-0.771447
9	123500001	123520000	9	124160001	124180000	-0.622788
9	123500001	123520000	9	124140001	124160000	-0.624118
9	123500001	123520000	9	123920001	123940000	-0.810139
9	123500001	123520000	9	123820001	123840000	-0.751077
9	123480001	123500000	9	124140001	124160000	-0.656635
9	118340001	118360000	9	119400001	119420000	-0.629607
9	117500001	117520000	9	117760001	117780000	-0.872721
9	117480001	117500000	9	117760001	117780000	-0.866515
9	117460001	117480000	9	117780001	117800000	-0.907436
9	117440001	117460000	9	117780001	117800000	-0.867142
9	117440001	117460000	9	117760001	117780000	-0.859498
9	117420001	117440000	9	117780001	117800000	-0.837048
9	117420001	117440000	9	117760001	117780000	-0.838818
9	117340001	117360000	9	117760001	117780000	-0.754337
9	117240001	117260000	9	117400001	117420000	-0.619368
9	117240001	117260000	9	117380001	117400000	-0.625903
9	117180001	117200000	9	117780001	117800000	-0.702243
9	117160001	117180000	9	117780001	117800000	-0.72507
9	117160001	117180000	9	117760001	117780000	-0.840604
9	117160001	117180000	9	117400001	117420000	-0.778107
9	117140001	117160000	9	117380001	117400000	-0.832039
9	117120001	117140000	9	117400001	117420000	-0.82969
9	117120001	117140000	9	117380001	117400000	-0.853081
9	117100001	117120000	9	117760001	117780000	-0.733253
9	117100001	117120000	9	117400001	117420000	-0.800792
9	117100001	117120000	9	117380001	117400000	-0.820309
9	117080001	117100000	9	117760001	117780000	-0.673119
9	117080001	117100000	9	117400001	117420000	-0.714416
9	116220001	116240000	9	116360001	116380000	-0.934716
9	116220001	116240000	9	116320001	116340000	-0.806621
9	116200001	116220000	9	116420001	116440000	-0.932804
9	116200001	116220000	9	116400001	116420000	-0.971684
9	116200001	116220000	9	116380001	116400000	-0.954413
9	116200001	116220000	9	116360001	116380000	-0.936209
9	116200001	116220000	9	116340001	116360000	-0.907458
9	116180001	116200000	9	116320001	116340000	-0.898635
9	116040001	116060000	9	116420001	116440000	-0.894175
9	116040001	116060000	9	116400001	116420000	-0.936424
9	116040001	116060000	9	116160001	116180000	-0.683194
9	116040001	116060000	9	116140001	116160000	-0.673362
9	116020001	116040000	9	116420001	116440000	-0.906462
9	116020001	116040000	9	116400001	116420000	-0.93862
9	116020001	116040000	9	116160001	116180000	-0.67906
9	116000001	116020000	9	116420001	116440000	-0.988666
9	115200001	115220000	9	115560001	115580000	-0.657827
9	115200001	115220000	9	115540001	115560000	-0.776297
9	115180001	115200000	9	115560001	115580000	-0.72597
9	114860001	114880000	9	115560001	115580000	-0.760618
9	114860001	114880000	9	115120001	115140000	-0.743507
9	114860001	114880000	9	115100001	115120000	-0.702438
9	114840001	114860000	9	115560001	115580000	-0.718883
9	114840001	114860000	9	115120001	115140000	-0.727715
9	114840001	114860000	9	115100001	115120000	-0.707266
9	114660001	114680000	9	115120001	115140000	-0.788951
9	114660001	114680000	9	115100001	115120000	-0.75796
9	114660001	114680000	9	114800001	114820000	-0.658341
9	114640001	114660000	9	115100001	115120000	-0.721226
9	114640001	114660000	9	114800001	114820000	-0.696612
9	114520001	114540000	9	115120001	115140000	-0.613358
9	114520001	114540000	9	114840001	114860000	-0.764766
9	114520001	114540000	9	114820001	114840000	-0.8045
9	114500001	114520000	9	115560001	115580000	-0.746338
9	114500001	114520000	9	115120001	115140000	-0.60272
9	114500001	114520000	9	114820001	114840000	-0.753327
9	114380001	114400000	9	115120001	115140000	-0.620537
9	114360001	114380000	9	114820001	114840000	-0.604034
9	112800001	112820000	9	112900001	112920000	-0.753837
9	112680001	112700000	9	112800001	112820000	-0.628117
9	112660001	112680000	9	112980001	113000000	-0.853673
9	112660001	112680000	9	112920001	112940000	-0.798344
9	112660001	112680000	9	112900001	112920000	-0.811002
9	112660001	112680000	9	112820001	112840000	-0.630261
9	112660001	112680000	9	112800001	112820000	-0.637885
9	112640001	112660000	9	112960001	112980000	-0.753106
9	112640001	112660000	9	112940001	112960000	-0.770291
9	112640001	112660000	9	112900001	112920000	-0.766695
9	111680001	111700000	9	111880001	111900000	-0.605897
9	111660001	111680000	9	111880001	111900000	-0.666938
9	109400001	109420000	9	109880001	109900000	-0.698073
9	108600001	108620000	9	109940001	109960000	-0.747313
9	108600001	108620000	9	109920001	109940000	-0.728515
9	108340001	108360000	9	108460001	108480000	-0.838826
9	108000001	108020000	9	108160001	108180000	-0.612493
9	107980001	108000000	9	108160001	108180000	-0.622987
9	107740001	107760000	9	108160001	108180000	-0.65385
9	107740001	107760000	9	108140001	108160000	-0.703186
9	107740001	107760000	9	107900001	107920000	-0.851832
9	107740001	107760000	9	107880001	107900000	-0.804929
9	107720001	107740000	9	108160001	108180000	-0.641455
9	107720001	107740000	9	107900001	107920000	-0.918617
9	107720001	107740000	9	107880001	107900000	-0.902287
9	107700001	107720000	9	108160001	108180000	-0.723227
9	107700001	107720000	9	107880001	107900000	-0.879538
9	107680001	107700000	9	107900001	107920000	-0.901119
9	107680001	107700000	9	107880001	107900000	-0.89071
9	107640001	107660000	9	107900001	107920000	-0.811836
9	107620001	107640000	9	108180001	108200000	-0.798358
9	107620001	107640000	9	108160001	108180000	-0.789001
9	107620001	107640000	9	107920001	107940000	-0.805088
9	107620001	107640000	9	107900001	107920000	-0.752708
9	107600001	107620000	9	108180001	108200000	-0.781013
9	107600001	107620000	9	107920001	107940000	-0.72744
9	107500001	107520000	9	108460001	108480000	-0.619466
9	105880001	105900000	9	106200001	106220000	-0.606393
9	105160001	105180000	9	105660001	105680000	-0.738977
9	104140001	104160000	9	104300001	104320000	-0.648565
9	103380001	103400000	9	104060001	104080000	-0.852732
9	102860001	102880000	9	103180001	103200000	-0.94374
9	102780001	102800000	9	103080001	103100000	-0.678575
9	102580001	102600000	9	102860001	102880000	-0.787591
9	102580001	102600000	9	102840001	102860000	-0.724773
9	102560001	102580000	9	103180001	103200000	-0.911373
9	102560001	102580000	9	103100001	103120000	-0.680318
9	102560001	102580000	9	103080001	103100000	-0.660444
9	102560001	102580000	9	102960001	102980000	-0.760165
9	102560001	102580000	9	102860001	102880000	-0.7874
9	102560001	102580000	9	102840001	102860000	-0.747589
9	102560001	102580000	9	102760001	102780000	-0.633405
9	102020001	102040000	9	102900001	102920000	-0.664763
9	102000001	102020000	9	103340001	103360000	-0.665149
9	101980001	102000000	9	103080001	103100000	-0.686332
9	101980001	102000000	9	102860001	102880000	-0.746521
9	101980001	102000000	9	102740001	102760000	-0.838298
9	101980001	102000000	9	102580001	102600000	-0.828749
9	101960001	101980000	9	103080001	103100000	-0.74566
9	101960001	101980000	9	102560001	102580000	-0.91265
9	101940001	101960000	9	103360001	103380000	-0.601317
9	101940001	101960000	9	103340001	103360000	-0.616119
9	101940001	101960000	9	103180001	103200000	-0.831333
9	101940001	101960000	9	102760001	102780000	-0.908587
9	101940001	101960000	9	102560001	102580000	-0.935589
9	101700001	101720000	9	103280001	103300000	-0.729206
9	100840001	100860000	9	101000001	101020000	-0.75761
9	100820001	100840000	9	101020001	101040000	-0.874741
9	100820001	100840000	9	101000001	101020000	-0.77585
9	100740001	100760000	9	101020001	101040000	-0.776203
9	100700001	100720000	9	101020001	101040000	-0.670356
9	100700001	100720000	9	101000001	101020000	-0.667904
9	100680001	100700000	9	101020001	101040000	-0.695621
9	100660001	100680000	9	101020001	101040000	-0.660568
9	100160001	100180000	9	100360001	100380000	-0.862284
9	99620001	99640000	9	100160001	100180000	-0.775517
9	99620001	99640000	9	100140001	100160000	-0.715
9	99600001	99620000	9	100360001	100380000	-0.745166
9	99600001	99620000	9	100160001	100180000	-0.873108
9	99080001	99100000	9	99420001	99440000	-0.63912
9	98640001	98660000	9	98760001	98780000	0.746141
9	98620001	98640000	9	98780001	98800000	0.620812
9	98480001	98500000	9	98640001	98660000	0.866518
9	98140001	98160000	9	98800001	98820000	-0.671947
9	98120001	98140000	9	98820001	98840000	-0.678804
9	97440001	97460000	9	97880001	97900000	-0.684834
9	97420001	97440000	9	97880001	97900000	-0.717636
9	96820001	96840000	9	96980001	97000000	-0.622844
9	96800001	96820000	9	96980001	97000000	-0.739779
9	96800001	96820000	9	96960001	96980000	-0.620632
9	95900001	95920000	9	96300001	96320000	-0.927547
9	95880001	95900000	9	96320001	96340000	-0.908007
9	95860001	95880000	9	96320001	96340000	-0.896997
9	95740001	95760000	9	96320001	96340000	-0.889073
9	95700001	95720000	9	96320001	96340000	-0.861012
9	95640001	95660000	9	96320001	96340000	-0.687955
9	95080001	95100000	9	95400001	95420000	-0.655154
9	95060001	95080000	9	95400001	95420000	-0.635036
9	94880001	94900000	9	95400001	95420000	-0.616005
9	92900001	92920000	9	93620001	93640000	-0.784599
9	92880001	92900000	9	93620001	93640000	-0.735189
9	92220001	92240000	9	93500001	93520000	-0.638896
9	92200001	92220000	9	93620001	93640000	-0.861963
9	92200001	92220000	9	93500001	93520000	-0.726939
9	92200001	92220000	9	92860001	92880000	-0.738876
9	92180001	92200000	9	93620001	93640000	-0.739809
9	92020001	92040000	9	92140001	92160000	-0.768446
9	92000001	92020000	9	92160001	92180000	-0.842823
9	92000001	92020000	9	92140001	92160000	-0.903441
9	92000001	92020000	9	92120001	92140000	-0.873844
9	91940001	91960000	9	92160001	92180000	-0.962712
9	91940001	91960000	9	92140001	92160000	-0.966469
9	91200001	91220000	9	91600001	91620000	-0.828939
9	91180001	91200000	9	91600001	91620000	-0.858826
9	90580001	90600000	9	91000001	91020000	-0.631739
9	88540001	88560000	9	88900001	88920000	-0.661441
9	88420001	88440000	9	88940001	88960000	-0.751098
9	88340001	88360000	9	88540001	88560000	-0.609072
9	88300001	88320000	9	88540001	88560000	-0.669056
9	87020001	87040000	9	88200001	88220000	-0.732921
9	87000001	87020000	9	88240001	88260000	-0.859723
9	87000001	87020000	9	88220001	88240000	-0.84762
9	87000001	87020000	9	88200001	88220000	-0.777521
9	86640001	86660000	9	86780001	86800000	-0.609198
9	86320001	86340000	9	86420001	86440000	-0.659872
9	86300001	86320000	9	86540001	86560000	-0.828828
9	86300001	86320000	9	86520001	86540000	-0.799634
9	86300001	86320000	9	86420001	86440000	-0.731219
9	86240001	86260000	9	86520001	86540000	-0.861143
9	86220001	86240000	9	86520001	86540000	-0.889132
9	86200001	86220000	9	86480001	86500000	-0.798976
9	83260001	83280000	9	83380001	83400000	0.78655
9	80060001	80080000	9	80860001	80880000	-0.893044
9	80060001	80080000	9	80820001	80840000	-0.929975
9	80060001	80080000	9	80720001	80740000	-0.863242
9	80060001	80080000	9	80640001	80660000	-0.792074
9	79780001	79800000	9	80840001	80860000	-0.603921
9	77560001	77580000	9	77680001	77700000	-0.628221
9	77380001	77400000	9	77820001	77840000	-0.619745
9	77380001	77400000	9	77800001	77820000	-0.654026
9	77380001	77400000	9	77780001	77800000	-0.643748
9	77380001	77400000	9	77680001	77700000	-0.645431
9	77380001	77400000	9	77660001	77680000	-0.673661
9	77380001	77400000	9	77600001	77620000	-0.650453
9	75720001	75740000	9	75780001	75800000	0.841113
9	75700001	75720000	9	75800001	75820000	0.828392
9	75700001	75720000	9	75780001	75800000	0.855552
9	74900001	74920000	9	75200001	75220000	-0.795874
9	73080001	73100000	9	73200001	73220000	-0.804649
9	73040001	73060000	9	73180001	73200000	-0.81054
9	73020001	73040000	9	74380001	74400000	-0.750108
9	73020001	73040000	9	73200001	73220000	-0.87425
9	73020001	73040000	9	73180001	73200000	-0.823466
9	72960001	72980000	9	73200001	73220000	-0.879137
9	72960001	72980000	9	73100001	73120000	-0.648585
9	72940001	72960000	9	73200001	73220000	-0.842389
9	72880001	72900000	9	73200001	73220000	-0.73345
9	72860001	72880000	9	73220001	73240000	-0.700411
9	72860001	72880000	9	73200001	73220000	-0.693068
9	72580001	72600000	9	73220001	73240000	-0.64726
9	6400001	6420000	9	6680001	6700000	-0.765318
9	6340001	6360000	9	6560001	6580000	-0.628732
9	5180001	5200000	9	5580001	5600000	-0.782532
9	5180001	5200000	9	5420001	5440000	-0.689872
9	4760001	4780000	9	5600001	5620000	-0.643792
9	4760001	4780000	9	5580001	5600000	-0.628611
9	4760001	4780000	9	5440001	5460000	-0.614467
9	4760001	4780000	9	5420001	5440000	-0.611499
9	4740001	4760000	9	5600001	5620000	-0.66907
9	4740001	4760000	9	5440001	5460000	-0.607237
9	38080001	38100000	9	38360001	38380000	-0.854247
9	37900001	37920000	9	38400001	38420000	-0.658289
9	37060001	37080000	9	37280001	37300000	-0.637072
9	37020001	37040000	9	37320001	37340000	-0.706494
9	37000001	37020000	9	37340001	37360000	-0.792494
9	37000001	37020000	9	37320001	37340000	-0.831703
9	36980001	37000000	9	37360001	37380000	-0.880575
9	36980001	37000000	9	37340001	37360000	-0.86878
9	36980001	37000000	9	37320001	37340000	-0.892853
9	36920001	36940000	9	37360001	37380000	-0.868992
9	36860001	36880000	9	37380001	37400000	-0.800776
9	36860001	36880000	9	37360001	37380000	-0.847852
9	36840001	36860000	9	37360001	37380000	-0.658557
9	36420001	36440000	9	36720001	36740000	-0.728623
9	36400001	36420000	9	36740001	36760000	-0.736666
9	36400001	36420000	9	36720001	36740000	-0.734996
9	36400001	36420000	9	36540001	36560000	-0.787628
9	36080001	36100000	9	36160001	36180000	0.661201
9	35780001	35800000	9	35880001	35900000	0.680982
9	35620001	35640000	9	35720001	35740000	0.755177
9	35620001	35640000	9	35700001	35720000	0.811196
9	35100001	35120000	9	35240001	35260000	0.729609
9	35080001	35100000	9	35620001	35640000	-0.776996
9	34900001	34920000	9	35580001	35600000	-0.663049
9	34900001	34920000	9	35460001	35480000	-0.722371
9	34880001	34900000	9	35460001	35480000	-0.714269
9	33080001	33100000	9	33220001	33240000	-0.710463
9	33060001	33080000	9	33240001	33260000	-0.889069
9	33060001	33080000	9	33220001	33240000	-0.780819
9	33040001	33060000	9	33280001	33300000	-0.869626
9	32580001	32600000	9	32960001	32980000	-0.729746
9	32560001	32580000	9	32980001	33000000	-0.757972
9	32540001	32560000	9	33000001	33020000	-0.750571
9	32540001	32560000	9	32980001	33000000	-0.747738
9	32380001	32400000	9	32980001	33000000	-0.653492
9	32380001	32400000	9	32960001	32980000	-0.672336
9	32380001	32400000	9	32560001	32580000	-0.881619
9	32360001	32380000	9	32960001	32980000	-0.661908
9	32360001	32380000	9	32580001	32600000	-0.875059
9	32360001	32380000	9	32560001	32580000	-0.824923
9	2860001	2880000	9	4360001	4380000	-0.782282
9	2860001	2880000	9	4340001	4360000	-0.777403
9	2860001	2880000	9	4300001	4320000	-0.778067
9	2840001	2860000	9	4340001	4360000	-0.733746
9	26940001	26960000	9	27560001	27580000	-0.633227
9	26920001	26940000	9	27560001	27580000	-0.652992
9	21820001	21840000	9	22240001	22260000	-0.626984
9	21820001	21840000	9	22220001	22240000	-0.62196
9	21800001	21820000	9	22220001	22240000	-0.603938
9	2140001	2160000	9	2820001	2840000	-0.769587
9	2120001	2140000	9	2820001	2840000	-0.752508
9	21320001	21340000	9	21780001	21800000	-0.790583
9	21320001	21340000	9	21400001	21420000	0.61999
9	21180001	21200000	9	21780001	21800000	-0.623118
9	20340001	20360000	9	20940001	20960000	-0.871969
8	19260001	19280000	8	19600001	19620000	-0.612117
8	19240001	19260000	8	19620001	19640000	-0.623208
8	19220001	19240000	8	19680001	19700000	-0.619754
8	19220001	19240000	8	19660001	19680000	-0.639321
8	17180001	17200000	8	17760001	17780000	-0.684428
8	17160001	17180000	8	17760001	17780000	-0.835889
8	1700001	1720000	8	2060001	2080000	-0.762619
8	17100001	17120000	8	17820001	17840000	-0.71657
8	17100001	17120000	8	17780001	17800000	-0.766247
8	17100001	17120000	8	17760001	17780000	-0.727315
8	17080001	17100000	8	17780001	17800000	-0.775725
8	1680001	1700000	8	1960001	1980000	-0.632214
8	145060001	145080000	8	145140001	145160000	0.714852
8	145040001	145060000	8	145140001	145160000	0.758704
8	144220001	144240000	8	144300001	144320000	0.655103
8	144200001	144220000	8	144340001	144360000	0.657255
8	144200001	144220000	8	144320001	144340000	0.68347
8	143940001	143960000	8	144120001	144140000	-0.678694
8	143920001	143940000	8	144120001	144140000	-0.754534
8	143860001	143880000	8	144120001	144140000	-0.794113
8	143860001	143880000	8	144100001	144120000	-0.72606
8	143840001	143860000	8	144120001	144140000	-0.652089
8	142640001	142660000	8	143280001	143300000	-0.823725
8	142520001	142540000	8	143520001	143540000	-0.879392
8	142080001	142100000	8	142340001	142360000	-0.686584
8	141840001	141860000	8	142360001	142380000	-0.97583
8	141840001	141860000	8	142340001	142360000	-0.96096
8	141840001	141860000	8	142180001	142200000	-0.709653
8	141840001	141860000	8	142100001	142120000	-0.715963
8	141840001	141860000	8	142080001	142100000	-0.620253
8	141820001	141840000	8	142360001	142380000	-0.988932
8	141820001	141840000	8	142340001	142360000	-0.980374
8	141820001	141840000	8	142180001	142200000	-0.680365
8	141820001	141840000	8	142080001	142100000	-0.614482
8	141540001	141560000	8	141620001	141640000	-0.848261
8	141520001	141540000	8	141640001	141660000	-0.908368
8	141520001	141540000	8	141620001	141640000	-0.829535
8	141480001	141500000	8	141640001	141660000	-0.952865
8	141460001	141480000	8	141640001	141660000	-0.938858
8	140720001	140740000	8	141640001	141660000	-0.704861
8	140720001	140740000	8	141420001	141440000	-0.728619
8	140720001	140740000	8	141400001	141420000	-0.796568
8	140720001	140740000	8	141380001	141400000	-0.825984
8	140720001	140740000	8	141120001	141140000	-0.997507
8	140700001	140720000	8	141400001	141420000	-0.833223
8	140640001	140660000	8	141400001	141420000	-0.823961
8	140420001	140440000	8	141400001	141420000	-0.755657
8	140420001	140440000	8	141380001	141400000	-0.780947
8	140400001	140420000	8	141400001	141420000	-0.665863
8	140400001	140420000	8	141380001	141400000	-0.709346
8	135720001	135740000	8	135840001	135860000	-0.781522
8	135720001	135740000	8	135820001	135840000	-0.833029
8	135700001	135720000	8	135880001	135900000	-0.787491
8	135700001	135720000	8	135860001	135880000	-0.807292
8	134900001	134920000	8	135680001	135700000	-0.609043
8	134640001	134660000	8	135680001	135700000	-0.885095
8	134580001	134600000	8	135680001	135700000	-0.915582
8	134560001	134580000	8	135840001	135860000	-0.698678
8	134560001	134580000	8	135700001	135720000	-0.85564
8	134560001	134580000	8	135680001	135700000	-0.870239
8	134540001	134560000	8	135820001	135840000	-0.659761
8	134540001	134560000	8	135700001	135720000	-0.813202
8	134520001	134540000	8	135860001	135880000	-0.646463
8	134520001	134540000	8	135840001	135860000	-0.626658
8	134520001	134540000	8	135700001	135720000	-0.782967
8	134500001	134520000	8	135860001	135880000	-0.643543
8	134500001	134520000	8	135840001	135860000	-0.618572
8	134500001	134520000	8	135700001	135720000	-0.768054
8	134500001	134520000	8	135680001	135700000	-0.793641
8	134480001	134500000	8	135700001	135720000	-0.697135
8	134480001	134500000	8	135680001	135700000	-0.733421
8	134300001	134320000	8	135700001	135720000	-0.734916
8	134300001	134320000	8	134460001	134480000	-0.64985
8	134280001	134300000	8	134440001	134460000	-0.686837
8	134220001	134240000	8	135700001	135720000	-0.71728
8	134220001	134240000	8	135680001	135700000	-0.726729
8	134220001	134240000	8	134460001	134480000	-0.823375
8	134220001	134240000	8	134440001	134460000	-0.756597
8	134200001	134220000	8	135680001	135700000	-0.733852
8	134200001	134220000	8	134460001	134480000	-0.834038
8	134080001	134100000	8	135840001	135860000	-0.683104
8	134060001	134080000	8	134460001	134480000	-0.80456
8	134020001	134040000	8	135700001	135720000	-0.715969
8	133880001	133900000	8	135680001	135700000	-0.635062
8	133880001	133900000	8	134460001	134480000	-0.751031
8	133880001	133900000	8	134440001	134460000	-0.732617
8	133880001	133900000	8	134200001	134220000	-0.688525
8	133800001	133820000	8	134440001	134460000	-0.706647
8	133760001	133780000	8	135700001	135720000	-0.620933
8	131200001	131220000	8	131680001	131700000	-0.694753
8	131200001	131220000	8	131360001	131380000	-0.638567
8	131160001	131180000	8	131520001	131540000	-0.668044
8	131160001	131180000	8	131480001	131500000	-0.671662
8	131140001	131160000	8	131680001	131700000	-0.722616
8	131140001	131160000	8	131520001	131540000	-0.65013
8	131120001	131140000	8	131680001	131700000	-0.719078
8	130860001	130880000	8	131060001	131080000	-0.602002
8	130840001	130860000	8	131040001	131060000	-0.733711
8	130840001	130860000	8	131020001	131040000	-0.66667
8	12900001	12920000	8	13500001	13520000	-0.697008
8	129000001	129020000	8	129660001	129680000	-0.673677
8	128980001	129000000	8	129660001	129680000	-0.716652
8	12880001	12900000	8	13520001	13540000	-0.703433
8	12880001	12900000	8	13500001	13520000	-0.69142
8	128920001	128940000	8	129660001	129680000	-0.758034
8	128760001	128780000	8	129280001	129300000	-0.674633
8	128740001	128760000	8	129660001	129680000	-0.960916
8	128180001	128200000	8	129660001	129680000	-0.759301
8	127880001	127900000	8	128720001	128740000	-0.737717
8	126720001	126740000	8	127400001	127420000	-0.740595
8	126720001	126740000	8	127380001	127400000	-0.744338
8	126720001	126740000	8	127280001	127300000	-0.733829
8	126700001	126720000	8	127380001	127400000	-0.679838
8	125600001	125620000	8	125920001	125940000	-0.604498
8	125580001	125600000	8	125960001	125980000	-0.677557
8	125580001	125600000	8	125940001	125960000	-0.662072
8	125560001	125580000	8	126940001	126960000	-0.775479
8	125560001	125580000	8	125980001	126000000	-0.690337
8	125560001	125580000	8	125960001	125980000	-0.662737
8	125540001	125560000	8	126000001	126020000	-0.750299
8	125540001	125560000	8	125980001	126000000	-0.701461
8	124420001	124440000	8	125460001	125480000	-0.702728
8	124400001	124420000	8	125460001	125480000	-0.728557
8	124260001	124280000	8	124420001	124440000	-0.772731
8	124260001	124280000	8	124400001	124420000	-0.789028
8	123800001	123820000	8	125460001	125480000	-0.784289
8	123800001	123820000	8	124020001	124040000	-0.95702
8	123780001	123800000	8	124400001	124420000	-0.92454
8	123780001	123800000	8	124160001	124180000	-0.988706
8	123780001	123800000	8	124040001	124060000	-0.97379
8	123780001	123800000	8	124020001	124040000	-0.963128
8	123760001	123780000	8	124020001	124040000	-0.970539
8	123740001	123760000	8	124180001	124200000	-0.952363
8	123740001	123760000	8	124040001	124060000	-0.975137
8	123720001	123740000	8	124200001	124220000	-0.909813
8	123720001	123740000	8	124180001	124200000	-0.92914
8	123700001	123720000	8	124720001	124740000	-0.620086
8	123700001	123720000	8	124700001	124720000	-0.640341
8	123700001	123720000	8	124200001	124220000	-0.895793
8	123700001	123720000	8	124180001	124200000	-0.91335
8	123680001	123700000	8	124220001	124240000	-0.868931
8	121460001	121480000	8	121940001	121960000	-0.734713
8	121460001	121480000	8	121920001	121940000	-0.782026
8	121460001	121480000	8	121880001	121900000	-0.769569
8	121460001	121480000	8	121860001	121880000	-0.754657
8	121460001	121480000	8	121840001	121860000	-0.701205
8	121460001	121480000	8	121820001	121840000	-0.74247
8	121440001	121460000	8	121940001	121960000	-0.768701
8	121120001	121140000	8	121940001	121960000	-0.784652
8	120880001	120900000	8	121080001	121100000	-0.776412
8	120860001	120880000	8	121420001	121440000	-0.610336
8	120860001	120880000	8	121100001	121120000	-0.700934
8	120860001	120880000	8	121080001	121100000	-0.701767
8	120840001	120860000	8	121440001	121460000	-0.635363
8	118860001	118880000	8	119140001	119160000	-0.646411
8	118520001	118540000	8	119120001	119140000	-0.666266
8	118520001	118540000	8	119100001	119120000	-0.64395
8	118500001	118520000	8	119120001	119140000	-0.638702
8	118340001	118360000	8	119420001	119440000	-0.846489
8	118320001	118340000	8	119420001	119440000	-0.795572
8	114940001	114960000	8	115180001	115200000	0.613995
8	11420001	11440000	8	11820001	11840000	-0.791603
8	11420001	11440000	8	11800001	11820000	-0.819373
8	11420001	11440000	8	11780001	11800000	-0.724101
8	11420001	11440000	8	11760001	11780000	-0.704379
8	11400001	11420000	8	11800001	11820000	-0.715141
8	110360001	110380000	8	110660001	110680000	-0.611656
8	110360001	110380000	8	110640001	110660000	-0.764275
8	110340001	110360000	8	110560001	110580000	-0.902061
8	110340001	110360000	8	110540001	110560000	-0.90065
8	109280001	109300000	8	109400001	109420000	-0.751271
8	109260001	109280000	8	109460001	109480000	-0.648316
8	109260001	109280000	8	109440001	109460000	-0.629321
8	109240001	109260000	8	110340001	110360000	-0.66524
8	109240001	109260000	8	109480001	109500000	-0.715468
8	109240001	109260000	8	109460001	109480000	-0.66456
8	108920001	108940000	8	109720001	109740000	-0.626169
8	108920001	108940000	8	109700001	109720000	-0.637238
8	108920001	108940000	8	109500001	109520000	-0.601588
8	108900001	108920000	8	109700001	109720000	-0.603692
8	108060001	108080000	8	108780001	108800000	-0.655118
8	107920001	107940000	8	108360001	108380000	-0.703574
8	107780001	107800000	8	108780001	108800000	-0.852211
8	107760001	107780000	8	107860001	107880000	-0.671973
8	107760001	107780000	8	107840001	107860000	-0.709046
8	107740001	107760000	8	109460001	109480000	-0.77983
8	107720001	107740000	8	107860001	107880000	-0.666975
8	107700001	107720000	8	107840001	107860000	-0.609259
8	106920001	106940000	8	107600001	107620000	-0.641423
8	106800001	106820000	8	107580001	107600000	-0.735568
8	105800001	105820000	8	106780001	106800000	-0.701071
8	105800001	105820000	8	106760001	106780000	-0.693207
8	105780001	105800000	8	106780001	106800000	-0.687913
8	105780001	105800000	8	106760001	106780000	-0.685522
8	105520001	105540000	8	106780001	106800000	-0.661291
8	105520001	105540000	8	106740001	106760000	-0.646265
8	104280001	104300000	8	104520001	104540000	-0.613479
8	104140001	104160000	8	104380001	104400000	-0.935832
8	104120001	104140000	8	104520001	104540000	-0.939797
8	104100001	104120000	8	104520001	104540000	-0.939034
8	104100001	104120000	8	104500001	104520000	-0.948432
8	104080001	104100000	8	104520001	104540000	-0.93165
8	103420001	103440000	8	103820001	103840000	-0.856405
8	103400001	103420000	8	103840001	103860000	-0.83652
8	103280001	103300000	8	103840001	103860000	-0.94644
8	103260001	103280000	8	103840001	103860000	-0.956186
8	103240001	103260000	8	103840001	103860000	-0.954037
8	102340001	102360000	8	103820001	103840000	-0.882654
8	102340001	102360000	8	103640001	103660000	-0.865273
8	102340001	102360000	8	103200001	103220000	-0.632927
8	102320001	102340000	8	103820001	103840000	-0.856744
8	102320001	102340000	8	103640001	103660000	-0.928826
8	102320001	102340000	8	103280001	103300000	-0.652805
8	102320001	102340000	8	103260001	103280000	-0.655134
8	102320001	102340000	8	103200001	103220000	-0.671341
8	101960001	101980000	8	103860001	103880000	-0.884138
8	101960001	101980000	8	102140001	102160000	-0.908297
8	101960001	101980000	8	102120001	102140000	-0.917764
8	101940001	101960000	8	103820001	103840000	-0.770419
8	101940001	101960000	8	102220001	102240000	-0.878165
8	101940001	101960000	8	102140001	102160000	-0.900447
8	101860001	101880000	8	102300001	102320000	-0.910005
8	101840001	101860000	8	102300001	102320000	-0.926044
8	101720001	101740000	8	102220001	102240000	-0.903128
8	101720001	101740000	8	101940001	101960000	-0.723255
8	101580001	101600000	8	102300001	102320000	-0.811991
8	101580001	101600000	8	101840001	101860000	-0.847511
8	101580001	101600000	8	101820001	101840000	-0.84441
8	101560001	101580000	8	101840001	101860000	-0.848679
8	101560001	101580000	8	101820001	101840000	-0.830629
8	101280001	101300000	8	101520001	101540000	-0.608375
8	101260001	101280000	8	101540001	101560000	-0.695012
8	101240001	101260000	8	101540001	101560000	-0.762308
8	101160001	101180000	8	102200001	102220000	-0.638612
8	101160001	101180000	8	101940001	101960000	-0.703697
8	101160001	101180000	8	101920001	101940000	-0.672914
8	101160001	101180000	8	101840001	101860000	-0.738896
8	101160001	101180000	8	101820001	101840000	-0.705805
8	101160001	101180000	8	101720001	101740000	-0.868027
8	101160001	101180000	8	101700001	101720000	-0.787682
8	101160001	101180000	8	101540001	101560000	-0.933514
8	100300001	100320000	8	101120001	101140000	-0.754563
8	99700001	99720000	8	101120001	101140000	-0.703344
8	99180001	99200000	8	101120001	101140000	-0.742788
8	99160001	99180000	8	101120001	101140000	-0.840815
8	98760001	98780000	8	99060001	99080000	-0.758049
8	98760001	98780000	8	99040001	99060000	-0.746638
8	98740001	98760000	8	99100001	99120000	-0.807145
8	98740001	98760000	8	99080001	99100000	-0.808156
8	98740001	98760000	8	99060001	99080000	-0.790017
8	98740001	98760000	8	99040001	99060000	-0.762472
8	98660001	98680000	8	99040001	99060000	-0.941824
8	98640001	98660000	8	99040001	99060000	-0.949744
8	98620001	98640000	8	99060001	99080000	-0.936533
8	98620001	98640000	8	99040001	99060000	-0.942304
8	98600001	98620000	8	99060001	99080000	-0.929674
8	98600001	98620000	8	99040001	99060000	-0.929216
8	98600001	98620000	8	98700001	98720000	-0.707987
8	98600001	98620000	8	98680001	98700000	-0.641306
8	96140001	96160000	8	96260001	96280000	-0.84326
8	96140001	96160000	8	96240001	96260000	-0.779726
8	96060001	96080000	8	96260001	96280000	-0.890219
8	96060001	96080000	8	96240001	96260000	-0.856617
8	96040001	96060000	8	96260001	96280000	-0.906046
8	95940001	95960000	8	96260001	96280000	-0.889418
8	95920001	95940000	8	96260001	96280000	-0.919016
8	95820001	95840000	8	96260001	96280000	-0.886861
8	95820001	95840000	8	96140001	96160000	-0.671239
8	95820001	95840000	8	96040001	96060000	-0.736301
8	95820001	95840000	8	96020001	96040000	-0.699315
8	95080001	95100000	8	95580001	95600000	-0.841993
8	95080001	95100000	8	95360001	95380000	-0.855854
8	95000001	95020000	8	95580001	95600000	-0.864385
8	95000001	95020000	8	95560001	95580000	-0.838723
8	95000001	95020000	8	95480001	95500000	-0.794733
8	95000001	95020000	8	95380001	95400000	-0.940087
8	95000001	95020000	8	95360001	95380000	-0.943691
8	94820001	94840000	8	94960001	94980000	-0.6639
8	94760001	94780000	8	95900001	95920000	-0.605488
8	94760001	94780000	8	95560001	95580000	-0.843242
8	94760001	94780000	8	94920001	94940000	-0.765871
8	94740001	94760000	8	95560001	95580000	-0.836076
8	94740001	94760000	8	94960001	94980000	-0.830458
8	94740001	94760000	8	94920001	94940000	-0.795071
8	94720001	94740000	8	95580001	95600000	-0.785194
8	94720001	94740000	8	95560001	95580000	-0.732102
8	94720001	94740000	8	94960001	94980000	-0.870349
8	94700001	94720000	8	94980001	95000000	-0.756159
8	94700001	94720000	8	94960001	94980000	-0.732693
8	93120001	93140000	8	93380001	93400000	0.743395
8	92800001	92820000	8	92920001	92940000	0.754925
8	92660001	92680000	8	92800001	92820000	0.638243
8	9220001	9240000	8	9680001	9700000	-0.720915
8	9220001	9240000	8	9660001	9680000	-0.720736
8	9200001	9220000	8	9680001	9700000	-0.747238
8	91000001	91020000	8	92080001	92100000	-0.912093
8	91000001	91020000	8	92060001	92080000	-0.857527
8	91000001	91020000	8	91960001	91980000	-0.686971
8	91000001	91020000	8	91640001	91660000	-0.839056
8	91000001	91020000	8	91580001	91600000	-0.823889
8	91000001	91020000	8	91560001	91580000	-0.788883
8	90980001	91000000	8	92080001	92100000	-0.929087
8	90900001	90920000	8	92080001	92100000	-0.899594
8	90880001	90900000	8	92060001	92080000	-0.902211
8	90860001	90880000	8	91600001	91620000	-0.725215
8	90860001	90880000	8	91580001	91600000	-0.737178
8	90860001	90880000	8	91560001	91580000	-0.636436
8	90840001	90860000	8	91580001	91600000	-0.771777
8	90840001	90860000	8	91560001	91580000	-0.650101
8	90760001	90780000	8	92080001	92100000	-0.752772
8	90740001	90760000	8	92080001	92100000	-0.792611
8	90740001	90760000	8	92060001	92080000	-0.896688
8	90720001	90740000	8	92080001	92100000	-0.804585
8	90720001	90740000	8	91960001	91980000	-0.807722
8	90720001	90740000	8	91640001	91660000	-0.81667
8	90720001	90740000	8	91620001	91640000	-0.847116
8	90720001	90740000	8	91600001	91620000	-0.81006
8	90720001	90740000	8	91580001	91600000	-0.804514
8	90720001	90740000	8	91560001	91580000	-0.756003
8	8980001	9000000	8	9680001	9700000	-0.678758
8	8900001	8920000	8	9680001	9700000	-0.732049
8	8880001	8900000	8	9680001	9700000	-0.708024
8	87120001	87140000	8	87360001	87380000	-0.630266
8	86360001	86380000	8	87060001	87080000	-0.657172
8	86360001	86380000	8	87040001	87060000	-0.640453
8	86360001	86380000	8	87020001	87040000	-0.642582
8	86360001	86380000	8	86980001	87000000	-0.642306
8	86340001	86360000	8	87040001	87060000	-0.613429
8	86340001	86360000	8	87020001	87040000	-0.632615
8	86340001	86360000	8	87000001	87020000	-0.620598
8	86340001	86360000	8	86980001	87000000	-0.632872
8	8620001	8640000	8	8840001	8860000	-0.714634
8	8620001	8640000	8	8820001	8840000	-0.653069
8	8600001	8620000	8	8840001	8860000	-0.719995
8	86120001	86140000	8	87340001	87360000	-0.819208
8	86100001	86120000	8	87340001	87360000	-0.832288
8	8520001	8540000	8	9680001	9700000	-0.680325
8	84520001	84540000	8	84780001	84800000	0.676626
8	84400001	84420000	8	84520001	84540000	0.910129
8	83540001	83560000	8	83700001	83720000	0.926266
8	82180001	82200000	8	82540001	82560000	-0.654011
8	82180001	82200000	8	82520001	82540000	-0.673087
8	81920001	81940000	8	82140001	82160000	-0.893904
8	81900001	81920000	8	82140001	82160000	-0.943052
8	8160001	8180000	8	8240001	8260000	0.618922
8	8140001	8160000	8	8240001	8260000	0.659809
8	81520001	81540000	8	82560001	82580000	-0.672635
8	81520001	81540000	8	82140001	82160000	-0.63364
8	81520001	81540000	8	81900001	81920000	-0.634278
8	81500001	81520000	8	82140001	82160000	-0.625168
8	8120001	8140000	8	8600001	8620000	-0.939976
8	8120001	8140000	8	8520001	8540000	-0.879364
8	8120001	8140000	8	8500001	8520000	-0.781963
8	8100001	8120000	8	8580001	8600000	-0.829692
8	8100001	8120000	8	8520001	8540000	-0.818498
8	80680001	80700000	8	80940001	80960000	-0.961067
8	80680001	80700000	8	80920001	80940000	-0.955653
8	80660001	80680000	8	80920001	80940000	-0.9386
8	80620001	80640000	8	80940001	80960000	-0.930924
8	80620001	80640000	8	80920001	80940000	-0.921217
8	80600001	80620000	8	81140001	81160000	-0.874139
8	80580001	80600000	8	81140001	81160000	-0.78734
8	80580001	80600000	8	81120001	81140000	-0.778281
8	80580001	80600000	8	80940001	80960000	-0.909563
8	80580001	80600000	8	80920001	80940000	-0.883742
8	74660001	74680000	8	74880001	74900000	-0.72353
8	74640001	74660000	8	74880001	74900000	-0.6603
8	74620001	74640000	8	74920001	74940000	-0.755988
8	74600001	74620000	8	74920001	74940000	-0.776561
8	74580001	74600000	8	75260001	75280000	-0.774543
8	74580001	74600000	8	75240001	75260000	-0.825626
8	74580001	74600000	8	74960001	74980000	-0.744589
8	74580001	74600000	8	74920001	74940000	-0.696249
8	74560001	74580000	8	75260001	75280000	-0.72131
8	74560001	74580000	8	74960001	74980000	-0.62544
8	74560001	74580000	8	74940001	74960000	-0.621205
8	74200001	74220000	8	75260001	75280000	-0.739025
8	74200001	74220000	8	75240001	75260000	-0.734367
8	74200001	74220000	8	74960001	74980000	-0.786246
8	74200001	74220000	8	74940001	74960000	-0.774095
8	74200001	74220000	8	74920001	74940000	-0.78095
8	74200001	74220000	8	74900001	74920000	-0.761085
8	74200001	74220000	8	74880001	74900000	-0.797745
8	74200001	74220000	8	74800001	74820000	-0.696517
8	74200001	74220000	8	74780001	74800000	-0.680704
8	74200001	74220000	8	74760001	74780000	-0.616656
8	74200001	74220000	8	74660001	74680000	-0.781423
8	74200001	74220000	8	74640001	74660000	-0.722327
8	74200001	74220000	8	74580001	74600000	-0.646608
8	74180001	74200000	8	75260001	75280000	-0.728445
8	74180001	74200000	8	74660001	74680000	-0.697573
8	73920001	73940000	8	74880001	74900000	-0.754804
8	73920001	73940000	8	74860001	74880000	-0.733913
8	71140001	71160000	8	71300001	71320000	-0.724883
8	71120001	71140000	8	71440001	71460000	-0.891679
8	71080001	71100000	8	71300001	71320000	-0.80715
8	71060001	71080000	8	71580001	71600000	-0.929027
8	71060001	71080000	8	71440001	71460000	-0.905486
8	71060001	71080000	8	71320001	71340000	-0.85846
8	71060001	71080000	8	71300001	71320000	-0.840309
8	71040001	71060000	8	71580001	71600000	-0.932105
8	71040001	71060000	8	71560001	71580000	-0.964242
8	71040001	71060000	8	71440001	71460000	-0.893069
8	71040001	71060000	8	71300001	71320000	-0.842158
8	70860001	70880000	8	72720001	72740000	-0.613905
8	70860001	70880000	8	72700001	72720000	-0.603594
8	70840001	70860000	8	72720001	72740000	-0.653632
8	70840001	70860000	8	72700001	72720000	-0.606317
8	70840001	70860000	8	71440001	71460000	-0.710979
8	69580001	69600000	8	69800001	69820000	0.677707
8	67600001	67620000	8	68140001	68160000	-0.760774
8	67580001	67600000	8	67980001	68000000	-0.700484
8	67580001	67600000	8	67960001	67980000	-0.721506
8	67360001	67380000	8	67820001	67840000	-0.647076
8	67340001	67360000	8	67980001	68000000	-0.752916
8	67340001	67360000	8	67960001	67980000	-0.728527
8	67340001	67360000	8	67820001	67840000	-0.693216
8	67340001	67360000	8	67680001	67700000	-0.887889
8	67340001	67360000	8	67580001	67600000	-0.862665
8	66980001	67000000	8	67320001	67340000	-0.785441
8	66960001	66980000	8	67340001	67360000	-0.913227
8	66960001	66980000	8	67320001	67340000	-0.850334
8	66740001	66760000	8	66940001	66960000	-0.609608
8	66680001	66700000	8	66940001	66960000	-0.675529
8	66660001	66680000	8	66940001	66960000	-0.664476
8	65020001	65040000	8	65140001	65160000	0.602506
8	64880001	64900000	8	65000001	65020000	0.775556
8	6280001	6300000	8	6640001	6660000	-0.826447
8	6280001	6300000	8	6620001	6640000	-0.829083
8	6260001	6280000	8	6640001	6660000	-0.794401
8	6260001	6280000	8	6620001	6640000	-0.811455
8	6260001	6280000	8	6560001	6580000	-0.78224
8	61580001	61600000	8	61920001	61940000	-0.74624
8	61560001	61580000	8	61960001	61980000	-0.80438
8	61560001	61580000	8	61920001	61940000	-0.76092
8	61540001	61560000	8	62000001	62020000	-0.817228
8	61540001	61560000	8	61960001	61980000	-0.826887
8	61540001	61560000	8	61940001	61960000	-0.839648
8	61520001	61540000	8	62000001	62020000	-0.835499
8	61500001	61520000	8	62000001	62020000	-0.815205
8	61340001	61360000	8	62000001	62020000	-0.846533
8	61340001	61360000	8	61980001	62000000	-0.916411
8	61320001	61340000	8	62020001	62040000	-0.906659
8	61320001	61340000	8	62000001	62020000	-0.872572
8	60060001	60080000	8	60380001	60400000	-0.773464
8	59700001	59720000	8	60820001	60840000	-0.778774
8	59660001	59680000	8	60820001	60840000	-0.782086
8	59640001	59660000	8	61300001	61320000	-0.670478
8	59640001	59660000	8	60840001	60860000	-0.804879
8	59620001	59640000	8	61300001	61320000	-0.674401
8	59620001	59640000	8	61280001	61300000	-0.672643
8	59620001	59640000	8	60840001	60860000	-0.778995
8	59620001	59640000	8	60820001	60840000	-0.755789
8	58320001	58340000	8	59520001	59540000	0.623194
8	57120001	57140000	8	57900001	57920000	-0.683555
8	56980001	57000000	8	57140001	57160000	-0.67815
8	56980001	57000000	8	57120001	57140000	-0.702858
8	56960001	56980000	8	57120001	57140000	-0.79715
8	55080001	55100000	8	56940001	56960000	-0.910245
8	55060001	55080000	8	56960001	56980000	-0.936714
8	55060001	55080000	8	56940001	56960000	-0.911611
8	54940001	54960000	8	55040001	55060000	-0.639578
8	54760001	54780000	8	55040001	55060000	-0.830569
8	54740001	54760000	8	55040001	55060000	-0.871654
8	53880001	53900000	8	55080001	55100000	-0.86998
8	53880001	53900000	8	55060001	55080000	-0.870977
8	53860001	53880000	8	55080001	55100000	-0.899882
8	53860001	53880000	8	55060001	55080000	-0.904642
8	53640001	53660000	8	54940001	54960000	-0.817567
8	53640001	53660000	8	54740001	54760000	-0.753123
8	53620001	53640000	8	55060001	55080000	-0.847993
8	53620001	53640000	8	55040001	55060000	-0.86249
8	53620001	53640000	8	54920001	54940000	-0.822001
8	53620001	53640000	8	54760001	54780000	-0.772111
8	53620001	53640000	8	54740001	54760000	-0.800078
8	53600001	53620000	8	54920001	54940000	-0.809865
8	53600001	53620000	8	54900001	54920000	-0.832203
8	53600001	53620000	8	54740001	54760000	-0.811417
8	53580001	53600000	8	55040001	55060000	-0.811022
8	53020001	53040000	8	53300001	53320000	-0.6867
8	52760001	52780000	8	52920001	52940000	-0.857274
8	52760001	52780000	8	52900001	52920000	-0.897093
8	52740001	52760000	8	52920001	52940000	-0.818089
8	49220001	49240000	8	49820001	49840000	-0.666705
8	48760001	48780000	8	48840001	48860000	-0.798063
8	48740001	48760000	8	48840001	48860000	-0.756928
8	48720001	48740000	8	48840001	48860000	-0.77049
8	42260001	42280000	8	42660001	42680000	-0.653037
8	42260001	42280000	8	42520001	42540000	-0.722505
8	41840001	41860000	8	42200001	42220000	-0.915129
8	41820001	41840000	8	42200001	42220000	-0.944243
8	41820001	41840000	8	42140001	42160000	-0.913365
8	41800001	41820000	8	42240001	42260000	-0.946388
8	41800001	41820000	8	42220001	42240000	-0.943748
8	41780001	41800000	8	42240001	42260000	-0.900824
8	41560001	41580000	8	42220001	42240000	-0.779648
8	41540001	41560000	8	42220001	42240000	-0.699808
8	38680001	38700000	8	38820001	38840000	-0.660918
8	38100001	38120000	8	38220001	38240000	-0.725663
8	38060001	38080000	8	38240001	38260000	-0.831219
8	38040001	38060000	8	38260001	38280000	-0.798371
8	38040001	38060000	8	38240001	38260000	-0.825071
8	37960001	37980000	8	38260001	38280000	-0.754379
8	37960001	37980000	8	38240001	38260000	-0.744568
8	37940001	37960000	8	38260001	38280000	-0.680696
8	37940001	37960000	8	38240001	38260000	-0.640331
8	37720001	37740000	8	38260001	38280000	-0.76693
8	37620001	37640000	8	38280001	38300000	-0.676339
8	37620001	37640000	8	38220001	38240000	-0.687745
8	37620001	37640000	8	38020001	38040000	-0.843179
8	37620001	37640000	8	38000001	38020000	-0.83209
8	37620001	37640000	8	37940001	37960000	-0.809499
8	37620001	37640000	8	37920001	37940000	-0.776932
8	37600001	37620000	8	38240001	38260000	-0.761875
8	37600001	37620000	8	38020001	38040000	-0.820943
8	37600001	37620000	8	37960001	37980000	-0.853831
8	37600001	37620000	8	37940001	37960000	-0.792279
8	36040001	36060000	8	36280001	36300000	0.84977
8	33340001	33360000	8	33420001	33440000	-0.72597
8	33320001	33340000	8	33440001	33460000	-0.724796
8	33260001	33280000	8	33440001	33460000	-0.661136
8	32400001	32420000	8	32960001	32980000	-0.636362
8	32380001	32400000	8	32940001	32960000	-0.609634
8	30780001	30800000	8	31040001	31060000	-0.808719
8	30760001	30780000	8	31040001	31060000	-0.890682
8	30760001	30780000	8	31020001	31040000	-0.902904
8	30540001	30560000	8	30880001	30900000	-0.660732
8	29920001	29940000	8	30000001	30020000	-0.629015
8	29580001	29600000	8	29880001	29900000	-0.865207
8	29200001	29220000	8	30000001	30020000	-0.962622
8	29200001	29220000	8	29580001	29600000	-0.720277
8	29200001	29220000	8	29560001	29580000	-0.763507
8	29180001	29200000	8	30020001	30040000	-0.937996
8	29180001	29200000	8	30000001	30020000	-0.951176
8	29180001	29200000	8	29900001	29920000	-0.889183
8	29180001	29200000	8	29880001	29900000	-0.863669
8	29180001	29200000	8	29580001	29600000	-0.763659
8	29180001	29200000	8	29560001	29580000	-0.80589
8	29160001	29180000	8	30140001	30160000	-0.956334
8	28260001	28280000	8	29920001	29940000	-0.775681
8	28240001	28260000	8	29940001	29960000	-0.806539
8	28240001	28260000	8	29920001	29940000	-0.773052
8	28220001	28240000	8	30020001	30040000	-0.823718
8	28200001	28220000	8	28440001	28460000	-0.676066
8	27900001	27920000	8	28440001	28460000	-0.686846
8	27320001	27340000	8	27440001	27460000	-0.607795
8	27300001	27320000	8	27600001	27620000	-0.852832
8	27300001	27320000	8	27440001	27460000	-0.685101
8	27180001	27200000	8	27620001	27640000	-0.831227
8	27180001	27200000	8	27280001	27300000	-0.862896
8	27180001	27200000	8	27260001	27280000	-0.827944
8	27160001	27180000	8	27600001	27620000	-0.90175
8	27160001	27180000	8	27440001	27460000	-0.826764
8	27140001	27160000	8	27600001	27620000	-0.94617
8	27140001	27160000	8	27440001	27460000	-0.828437
8	26540001	26560000	8	27460001	27480000	-0.626292
8	26540001	26560000	8	27440001	27460000	-0.619854
8	26140001	26160000	8	26220001	26240000	-0.693652
8	25360001	25380000	8	25960001	25980000	-0.659091
8	25360001	25380000	8	25940001	25960000	-0.610832
8	25340001	25360000	8	26180001	26200000	-0.765288
8	25320001	25340000	8	26180001	26200000	-0.794717
8	25320001	25340000	8	26160001	26180000	-0.80637
8	25300001	25320000	8	26420001	26440000	-0.897495
8	25300001	25320000	8	26160001	26180000	-0.77356
8	25300001	25320000	8	26120001	26140000	-0.69955
8	24740001	24760000	8	24840001	24860000	0.7008
8	24740001	24760000	8	24820001	24840000	0.681889
8	23320001	23340000	8	24080001	24100000	-0.705258
8	23000001	23020000	8	23260001	23280000	-0.671064
8	22980001	23000000	8	23260001	23280000	-0.697368
8	22480001	22500000	8	22760001	22780000	-0.646182
8	22460001	22480000	8	22760001	22780000	-0.727475
8	22280001	22300000	8	22420001	22440000	-0.766418
8	22280001	22300000	8	22400001	22420000	-0.615999
8	21780001	21800000	8	22000001	22020000	-0.607904
8	21780001	21800000	8	21980001	22000000	-0.681502
8	21760001	21780000	8	22000001	22020000	-0.707259
8	21760001	21780000	8	21980001	22000000	-0.772393
8	21760001	21780000	8	21960001	21980000	-0.723286
8	21760001	21780000	8	21920001	21940000	-0.637274
8	2060001	2080000	8	2140001	2160000	-0.605887
8	2040001	2060000	8	2180001	2200000	-0.620599
8	2040001	2060000	8	2140001	2160000	-0.612446
8	20280001	20300000	8	22000001	22020000	-0.763028
8	20280001	20300000	8	21900001	21920000	-0.787797
8	20280001	20300000	8	21760001	21780000	-0.740746
8	20280001	20300000	8	21740001	21760000	-0.765072
8	20260001	20280000	8	21740001	21760000	-0.777832
8	2000001	2020000	8	2180001	2200000	-0.608011
8	20080001	20100000	8	20220001	20240000	-0.757093
8	20060001	20080000	8	21760001	21780000	-0.936972
7	19620001	19640000	7	19920001	19940000	0.785723
7	19220001	19240000	7	19420001	19440000	0.746946
7	1860001	1880000	7	2040001	2060000	-0.898225
7	17820001	17840000	7	18360001	18380000	-0.669111
7	17800001	17820000	7	18380001	18400000	-0.67532
7	17800001	17820000	7	18360001	18380000	-0.692471
7	17780001	17800000	7	18360001	18380000	-0.701426
7	17720001	17740000	7	18700001	18720000	-0.652006
7	17720001	17740000	7	18380001	18400000	-0.649008
7	17720001	17740000	7	18360001	18380000	-0.647101
7	1700001	1720000	7	2360001	2380000	-0.915918
7	17040001	17060000	7	17340001	17360000	-0.69494
7	17020001	17040000	7	17700001	17720000	-0.683462
7	17020001	17040000	7	17340001	17360000	-0.680206
7	1680001	1700000	7	2380001	2400000	-0.94522
7	1620001	1640000	7	2380001	2400000	-0.942696
7	1620001	1640000	7	2240001	2260000	-0.901847
7	1600001	1620000	7	2380001	2400000	-0.929359
7	1580001	1600000	7	2560001	2580000	-0.918665
7	158560001	158580000	7	158760001	158780000	-0.868561
7	158540001	158560000	7	158760001	158780000	-0.928766
7	158520001	158540000	7	158680001	158700000	-0.747748
7	158480001	158500000	7	158760001	158780000	-0.895615
7	158460001	158480000	7	158760001	158780000	-0.818706
7	158320001	158340000	7	158920001	158940000	-0.875771
7	156740001	156760000	7	157160001	157180000	-0.667625
7	156740001	156760000	7	157140001	157160000	-0.626488
7	156740001	156760000	7	157020001	157040000	-0.605091
7	156740001	156760000	7	156920001	156940000	-0.634533
7	156720001	156740000	7	157100001	157120000	-0.644045
7	156720001	156740000	7	157060001	157080000	-0.638504
7	156720001	156740000	7	157040001	157060000	-0.678756
7	156700001	156720000	7	157040001	157060000	-0.666092
7	156680001	156700000	7	157140001	157160000	-0.603603
7	155640001	155660000	7	156220001	156240000	-0.617191
7	155620001	155640000	7	156280001	156300000	-0.652802
7	155600001	155620000	7	156260001	156280000	-0.621245
7	155600001	155620000	7	156240001	156260000	-0.630067
7	155580001	155600000	7	157060001	157080000	-0.697962
7	155580001	155600000	7	156260001	156280000	-0.717303
7	155400001	155420000	7	155540001	155560000	-0.761667
7	155380001	155400000	7	155540001	155560000	-0.790871
7	154780001	154800000	7	155120001	155140000	-0.916712
7	154780001	154800000	7	155080001	155100000	-0.914163
7	154720001	154740000	7	155540001	155560000	-0.69263
7	154720001	154740000	7	155120001	155140000	-0.900232
7	154720001	154740000	7	155100001	155120000	-0.87838
7	154720001	154740000	7	154980001	155000000	-0.662585
7	154700001	154720000	7	155520001	155540000	-0.633416
7	154700001	154720000	7	155140001	155160000	-0.787049
7	154700001	154720000	7	155120001	155140000	-0.816542
7	154700001	154720000	7	155080001	155100000	-0.764996
7	154700001	154720000	7	154980001	155000000	-0.709196
7	154700001	154720000	7	154960001	154980000	-0.704374
7	154680001	154700000	7	155180001	155200000	-0.862157
7	154660001	154680000	7	155260001	155280000	-0.742889
7	152140001	152160000	7	152360001	152380000	-0.703054
7	152140001	152160000	7	152340001	152360000	-0.668524
7	152120001	152140000	7	152360001	152380000	-0.699649
7	152120001	152140000	7	152340001	152360000	-0.675771
7	152040001	152060000	7	152360001	152380000	-0.715407
7	152020001	152040000	7	152380001	152400000	-0.724759
7	152020001	152040000	7	152360001	152380000	-0.704574
7	152000001	152020000	7	152360001	152380000	-0.631713
7	150200001	150220000	7	150440001	150460000	-0.604809
7	150160001	150180000	7	150420001	150440000	-0.624536
7	150140001	150160000	7	150440001	150460000	-0.676978
7	150120001	150140000	7	150460001	150480000	-0.662772
7	148260001	148280000	7	148660001	148680000	-0.731682
7	148260001	148280000	7	148640001	148660000	-0.714984
7	148240001	148260000	7	148640001	148660000	-0.699121
7	148200001	148220000	7	148740001	148760000	-0.70128
7	148200001	148220000	7	148660001	148680000	-0.76023
7	145740001	145760000	7	145940001	145960000	0.779327
7	145600001	145620000	7	145800001	145820000	0.797994
7	144920001	144940000	7	145520001	145540000	-0.891453
7	144460001	144480000	7	144560001	144580000	-0.640547
7	142700001	142720000	7	142900001	142920000	-0.638751
7	140500001	140520000	7	140720001	140740000	-0.768208
7	140500001	140520000	7	140700001	140720000	-0.747661
7	140400001	140420000	7	140700001	140720000	-0.717333
7	140380001	140400000	7	140720001	140740000	-0.685059
7	140380001	140400000	7	140700001	140720000	-0.720648
7	140360001	140380000	7	140720001	140740000	-0.685674
7	140360001	140380000	7	140700001	140720000	-0.716539
7	140200001	140220000	7	140700001	140720000	-0.627117
7	140180001	140200000	7	140700001	140720000	-0.613487
7	140180001	140200000	7	140340001	140360000	-0.608646
7	140160001	140180000	7	140340001	140360000	-0.613754
7	139880001	139900000	7	139980001	140000000	-0.703645
7	139860001	139880000	7	140000001	140020000	-0.720216
7	139800001	139820000	7	140000001	140020000	-0.728035
7	139760001	139780000	7	140020001	140040000	-0.734338
7	139740001	139760000	7	140020001	140040000	-0.757331
7	139740001	139760000	7	140000001	140020000	-0.739982
7	139720001	139740000	7	140000001	140020000	-0.777438
7	139460001	139480000	7	139700001	139720000	-0.835493
7	139460001	139480000	7	139680001	139700000	-0.8294
7	139440001	139460000	7	139700001	139720000	-0.853243
7	139440001	139460000	7	139680001	139700000	-0.830962
7	139320001	139340000	7	139700001	139720000	-0.885481
7	139320001	139340000	7	139680001	139700000	-0.879293
7	139300001	139320000	7	140020001	140040000	-0.706648
7	139300001	139320000	7	140000001	140020000	-0.707531
7	139300001	139320000	7	139800001	139820000	-0.763254
7	139300001	139320000	7	139700001	139720000	-0.798963
7	139280001	139300000	7	140040001	140060000	-0.755277
7	139280001	139300000	7	140020001	140040000	-0.745532
7	139180001	139200000	7	139700001	139720000	-0.662357
7	139160001	139180000	7	139700001	139720000	-0.706983
7	139120001	139140000	7	139700001	139720000	-0.696857
7	138140001	138160000	7	138540001	138560000	-0.762939
7	138140001	138160000	7	138420001	138440000	-0.78472
7	138120001	138140000	7	138560001	138580000	-0.80736
7	138120001	138140000	7	138540001	138560000	-0.803853
7	138120001	138140000	7	138420001	138440000	-0.79262
7	138120001	138140000	7	138400001	138420000	-0.818352
7	137840001	137860000	7	138540001	138560000	-0.859441
7	137840001	137860000	7	138520001	138540000	-0.845655
7	137840001	137860000	7	138500001	138520000	-0.840959
7	137840001	137860000	7	138420001	138440000	-0.791215
7	137840001	137860000	7	138400001	138420000	-0.744872
7	137680001	137700000	7	138420001	138440000	-0.823808
7	137680001	137700000	7	138400001	138420000	-0.830255
7	137660001	137680000	7	138420001	138440000	-0.826378
7	137600001	137620000	7	138540001	138560000	-0.748745
7	137580001	137600000	7	138540001	138560000	-0.72611
7	137580001	137600000	7	138420001	138440000	-0.702835
7	137580001	137600000	7	137680001	137700000	-0.645643
7	136300001	136320000	7	137040001	137060000	-0.673534
7	136220001	136240000	7	136780001	136800000	-0.815634
7	135340001	135360000	7	135680001	135700000	-0.791926
7	135340001	135360000	7	135660001	135680000	-0.827991
7	135320001	135340000	7	135680001	135700000	-0.810812
7	135240001	135260000	7	135320001	135340000	-0.618799
7	134960001	134980000	7	135700001	135720000	-0.894532
7	134960001	134980000	7	135320001	135340000	-0.797561
7	134960001	134980000	7	135240001	135260000	-0.816416
7	134940001	134960000	7	135320001	135340000	-0.850413
7	134660001	134680000	7	134840001	134860000	-0.673384
7	134660001	134680000	7	134820001	134840000	-0.734218
7	134440001	134460000	7	134620001	134640000	-0.615845
7	134420001	134440000	7	134840001	134860000	-0.67714
7	134420001	134440000	7	134640001	134660000	-0.629696
7	134420001	134440000	7	134620001	134640000	-0.616807
7	134400001	134420000	7	134620001	134640000	-0.656802
7	134320001	134340000	7	134860001	134880000	-0.778074
7	134320001	134340000	7	134840001	134860000	-0.810898
7	134320001	134340000	7	134820001	134840000	-0.719344
7	134320001	134340000	7	134640001	134660000	-0.766783
7	134300001	134320000	7	134640001	134660000	-0.79529
7	134300001	134320000	7	134620001	134640000	-0.778127
7	134120001	134140000	7	134880001	134900000	-0.716177
7	134100001	134120000	7	134860001	134880000	-0.649325
7	132760001	132780000	7	132940001	132960000	-0.849745
7	132760001	132780000	7	132920001	132940000	-0.867441
7	132360001	132380000	7	132920001	132940000	-0.780727
7	132260001	132280000	7	133120001	133140000	-0.635973
7	132000001	132020000	7	133120001	133140000	-0.933551
7	131960001	131980000	7	132860001	132880000	-0.698615
7	131940001	131960000	7	132880001	132900000	-0.698948
7	130760001	130780000	7	131100001	131120000	-0.695224
7	130760001	130780000	7	131080001	131100000	-0.691596
7	130740001	130760000	7	131100001	131120000	-0.704198
7	130740001	130760000	7	131060001	131080000	-0.683528
7	130560001	130580000	7	131100001	131120000	-0.826835
7	129880001	129900000	7	130440001	130460000	-0.648607
7	129880001	129900000	7	130120001	130140000	-0.73278
7	129860001	129880000	7	130440001	130460000	-0.726298
7	129860001	129880000	7	130420001	130440000	-0.653095
7	129860001	129880000	7	130120001	130140000	-0.835719
7	129700001	129720000	7	130520001	130540000	-0.771609
7	129700001	129720000	7	130500001	130520000	-0.766823
7	129700001	129720000	7	130480001	130500000	-0.782729
7	129700001	129720000	7	130440001	130460000	-0.770922
7	129700001	129720000	7	130420001	130440000	-0.738177
7	129480001	129500000	7	129620001	129640000	-0.653606
7	129480001	129500000	7	129580001	129600000	-0.600279
7	129460001	129480000	7	129640001	129660000	-0.796382
7	129460001	129480000	7	129620001	129640000	-0.750397
7	129380001	129400000	7	129640001	129660000	-0.785512
7	129360001	129380000	7	129640001	129660000	-0.738087
7	129320001	129340000	7	129640001	129660000	-0.793987
7	129300001	129320000	7	129640001	129660000	-0.749903
7	129280001	129300000	7	129640001	129660000	-0.710026
7	128120001	128140000	7	128520001	128540000	-0.786156
7	128100001	128120000	7	128500001	128520000	-0.822013
7	127020001	127040000	7	127220001	127240000	-0.876902
7	123300001	123320000	7	123500001	123520000	-0.608167
7	123180001	123200000	7	123380001	123400000	-0.7715
7	120980001	121000000	7	121180001	121200000	-0.658214
7	116620001	116640000	7	116760001	116780000	-0.772064
7	116600001	116620000	7	116760001	116780000	-0.829033
7	116600001	116620000	7	116740001	116760000	-0.785408
7	116580001	116600000	7	116760001	116780000	-0.804645
7	116560001	116580000	7	116760001	116780000	-0.686146
7	115900001	115920000	7	116440001	116460000	-0.761704
7	115880001	115900000	7	116460001	116480000	-0.658669
7	115880001	115900000	7	116440001	116460000	-0.786554
7	115820001	115840000	7	116460001	116480000	-0.666265
7	112080001	112100000	7	112420001	112440000	-0.661893
7	111840001	111860000	7	112080001	112100000	-0.852315
7	111840001	111860000	7	112060001	112080000	-0.870811
7	111820001	111840000	7	112060001	112080000	-0.854615
7	111380001	111400000	7	112140001	112160000	-0.624365
7	111380001	111400000	7	112120001	112140000	-0.607763
7	111360001	111380000	7	112540001	112560000	-0.801951
7	109020001	109040000	7	109340001	109360000	-0.919311
7	10860001	10880000	7	11180001	11200000	-0.89138
7	107820001	107840000	7	108120001	108140000	-0.673531
7	107800001	107820000	7	108140001	108160000	-0.644649
7	107800001	107820000	7	108120001	108140000	-0.650855
7	106840001	106860000	7	107360001	107380000	-0.691259
7	106820001	106840000	7	107380001	107400000	-0.66998
7	106820001	106840000	7	107360001	107380000	-0.657163
7	106800001	106820000	7	107520001	107540000	-0.626917
7	106800001	106820000	7	107380001	107400000	-0.636817
7	106800001	106820000	7	107360001	107380000	-0.644638
7	106580001	106600000	7	106780001	106800000	-0.713898
7	106520001	106540000	7	106780001	106800000	-0.846186
7	106500001	106520000	7	106780001	106800000	-0.902488
7	106500001	106520000	7	106760001	106780000	-0.8885
7	106420001	106440000	7	106780001	106800000	-0.882687
7	106300001	106320000	7	106780001	106800000	-0.661866
7	106280001	106300000	7	107500001	107520000	-0.810064
7	105400001	105420000	7	105660001	105680000	-0.845956
7	105380001	105400000	7	105660001	105680000	-0.935301
7	105300001	105320000	7	105660001	105680000	-0.955258
7	105300001	105320000	7	105520001	105540000	-0.849025
7	105300001	105320000	7	105500001	105520000	-0.738123
7	105280001	105300000	7	105800001	105820000	-0.743244
7	105280001	105300000	7	105780001	105800000	-0.813625
7	105280001	105300000	7	105660001	105680000	-0.961105
7	104600001	104620000	7	105740001	105760000	-0.677235
7	104580001	104600000	7	105160001	105180000	-0.673405
7	103860001	103880000	7	104520001	104540000	-0.636434
7	100180001	100200000	7	100440001	100460000	-0.686736
7	100140001	100160000	7	100440001	100460000	-0.624636
7	99720001	99740000	7	100000001	100020000	-0.648103
7	99720001	99740000	7	99920001	99940000	-0.632846
7	9880001	9900000	7	10100001	10120000	0.692192
7	98640001	98660000	7	98900001	98920000	-0.737818
7	98620001	98640000	7	98900001	98920000	-0.737839
7	97740001	97760000	7	97880001	97900000	-0.606555
7	96040001	96060000	7	96660001	96680000	-0.798825
7	96040001	96060000	7	96640001	96660000	-0.802755
7	96020001	96040000	7	96660001	96680000	-0.799666
7	95860001	95880000	7	95960001	95980000	-0.721379
7	95700001	95720000	7	96660001	96680000	-0.676402
7	95700001	95720000	7	96640001	96660000	-0.6836
7	95680001	95700000	7	96680001	96700000	-0.65853
7	95680001	95700000	7	96660001	96680000	-0.646646
7	95560001	95580000	7	96800001	96820000	-0.787855
7	95540001	95560000	7	96800001	96820000	-0.815249
7	94140001	94160000	7	95080001	95100000	-0.750593
7	92740001	92760000	7	92840001	92860000	-0.790481
7	92720001	92740000	7	92840001	92860000	-0.795936
7	92480001	92500000	7	92660001	92680000	-0.697976
7	92320001	92340000	7	92680001	92700000	-0.945206
7	92320001	92340000	7	92660001	92680000	-0.846688
7	92300001	92320000	7	92680001	92700000	-0.939757
7	92300001	92320000	7	92660001	92680000	-0.908631
7	92280001	92300000	7	92460001	92480000	-0.629097
7	92260001	92280000	7	92460001	92480000	-0.641424
7	92240001	92260000	7	92860001	92880000	-0.901121
7	92240001	92260000	7	92840001	92860000	-0.910572
7	92240001	92260000	7	92680001	92700000	-0.937752
7	92240001	92260000	7	92660001	92680000	-0.887296
7	92240001	92260000	7	92460001	92480000	-0.710194
7	92240001	92260000	7	92440001	92460000	-0.688356
7	92220001	92240000	7	92860001	92880000	-0.906427
7	92220001	92240000	7	92840001	92860000	-0.922498
7	92160001	92180000	7	92860001	92880000	-0.945463
7	92160001	92180000	7	92740001	92760000	-0.962173
7	92160001	92180000	7	92680001	92700000	-0.89068
7	92140001	92160000	7	92860001	92880000	-0.856268
7	92080001	92100000	7	92680001	92700000	-0.664382
7	92040001	92060000	7	92680001	92700000	-0.703275
7	90700001	90720000	7	91500001	91520000	-0.616453
7	88180001	88200000	7	88340001	88360000	0.8566
7	87420001	87440000	7	87520001	87540000	-0.689316
7	87420001	87440000	7	87500001	87520000	-0.792165
7	87400001	87420000	7	87520001	87540000	-0.640676
7	86840001	86860000	7	87500001	87520000	-0.753084
7	86820001	86840000	7	87500001	87520000	-0.792298
7	86800001	86820000	7	87500001	87520000	-0.687136
7	86780001	86800000	7	87500001	87520000	-0.674111
7	86560001	86580000	7	86840001	86860000	-0.614748
7	85480001	85500000	7	85580001	85600000	0.681645
7	83060001	83080000	7	83240001	83260000	0.82213
7	82520001	82540000	7	82640001	82660000	0.775364
7	81100001	81120000	7	82200001	82220000	-0.604398
7	8020001	8040000	7	8220001	8240000	-0.685825
7	8020001	8040000	7	8200001	8220000	-0.653447
7	8000001	8020000	7	8220001	8240000	-0.661689
7	79700001	79720000	7	80040001	80060000	-0.614665
7	7720001	7740000	7	8220001	8240000	-0.762599
7	7700001	7720000	7	8240001	8260000	-0.676789
7	7640001	7660000	7	8240001	8260000	-0.710382
7	7620001	7640000	7	8240001	8260000	-0.698933
7	73480001	73500000	7	73800001	73820000	-0.676805
7	73460001	73480000	7	73820001	73840000	-0.64334
7	73460001	73480000	7	73800001	73820000	-0.601875
7	7140001	7160000	7	8240001	8260000	-0.795493
7	7140001	7160000	7	7580001	7600000	-0.784656
7	7140001	7160000	7	7560001	7580000	-0.803594
7	7120001	7140000	7	7580001	7600000	-0.722137
7	70100001	70120000	7	70240001	70260000	0.637172
7	69660001	69680000	7	70060001	70080000	-0.603713
7	69520001	69540000	7	70020001	70040000	-0.627869
7	69320001	69340000	7	70080001	70100000	-0.749341
7	69100001	69120000	7	69660001	69680000	-0.838974
7	69060001	69080000	7	70160001	70180000	-0.825505
7	69040001	69060000	7	70160001	70180000	-0.820235
7	69040001	69060000	7	70140001	70160000	-0.832846
7	68800001	68820000	7	68940001	68960000	-0.666861
7	68640001	68660000	7	70140001	70160000	-0.700602
7	68040001	68060000	7	68480001	68500000	-0.858273
7	67960001	67980000	7	68120001	68140000	-0.752095
7	67900001	67920000	7	68140001	68160000	-0.829432
7	67660001	67680000	7	68220001	68240000	-0.884084
7	67400001	67420000	7	67920001	67940000	-0.767831
7	66300001	66320000	7	66440001	66460000	-0.607366
7	66200001	66220000	7	66460001	66480000	-0.712343
7	66200001	66220000	7	66440001	66460000	-0.745068
7	66020001	66040000	7	66460001	66480000	-0.714169
7	66020001	66040000	7	66380001	66400000	-0.770389
7	66020001	66040000	7	66300001	66320000	-0.806946
7	66020001	66040000	7	66200001	66220000	-0.771041
7	66000001	66020000	7	66260001	66280000	-0.836182
7	6040001	6060000	7	6360001	6380000	-0.712742
7	55660001	55680000	7	56060001	56080000	-0.91351
7	55340001	55360000	7	56000001	56020000	-0.646321
7	53580001	53600000	7	54100001	54120000	0.799598
7	53200001	53220000	7	53400001	53420000	0.660415
7	50240001	50260000	7	50420001	50440000	-0.785657
7	50220001	50240000	7	51200001	51220000	-0.717029
7	50220001	50240000	7	50440001	50460000	-0.902612
7	50180001	50200000	7	50480001	50500000	-0.895819
7	50180001	50200000	7	50460001	50480000	-0.894736
7	50180001	50200000	7	50440001	50460000	-0.870204
7	50160001	50180000	7	50480001	50500000	-0.840689
7	50160001	50180000	7	50460001	50480000	-0.838325
7	50140001	50160000	7	51220001	51240000	-0.686964
7	50140001	50160000	7	51200001	51220000	-0.676592
7	50140001	50160000	7	50500001	50520000	-0.842097
7	50140001	50160000	7	50480001	50500000	-0.823753
7	50120001	50140000	7	51220001	51240000	-0.68891
7	50120001	50140000	7	51200001	51220000	-0.685392
7	50120001	50140000	7	50520001	50540000	-0.850437
7	4840001	4860000	7	5120001	5140000	-0.821984
7	4840001	4860000	7	5100001	5120000	-0.766045
7	4820001	4840000	7	5120001	5140000	-0.872567
7	48020001	48040000	7	48140001	48160000	-0.760521
7	48020001	48040000	7	48120001	48140000	-0.753305
7	48000001	48020000	7	48140001	48160000	-0.715166
7	44980001	45000000	7	45160001	45180000	-0.62155
7	44880001	44900000	7	45160001	45180000	-0.718671
7	44620001	44640000	7	45160001	45180000	-0.622008
7	44620001	44640000	7	45140001	45160000	-0.652916
7	44620001	44640000	7	44940001	44960000	-0.605606
7	44620001	44640000	7	44900001	44920000	-0.624293
7	44600001	44620000	7	45160001	45180000	-0.644586
7	44280001	44300000	7	44580001	44600000	-0.662112
7	44260001	44280000	7	44520001	44540000	-0.653953
7	44260001	44280000	7	44500001	44520000	-0.602198
7	44240001	44260000	7	44580001	44600000	-0.850211
7	43620001	43640000	7	43880001	43900000	-0.645456
7	43620001	43640000	7	43740001	43760000	-0.813469
7	43620001	43640000	7	43720001	43740000	-0.773049
7	43600001	43620000	7	43880001	43900000	-0.714861
7	43600001	43620000	7	43860001	43880000	-0.712747
7	42980001	43000000	7	43880001	43900000	-0.646315
7	42980001	43000000	7	43580001	43600000	-0.640694
7	42960001	42980000	7	43880001	43900000	-0.601425
7	42960001	42980000	7	43800001	43820000	-0.602431
7	41980001	42000000	7	43860001	43880000	-0.608437
7	41220001	41240000	7	41380001	41400000	0.926016
7	39900001	39920000	7	40180001	40200000	-0.756061
7	39640001	39660000	7	40180001	40200000	-0.71551
7	39620001	39640000	7	40160001	40180000	-0.764558
7	39620001	39640000	7	40120001	40140000	-0.754402
7	39620001	39640000	7	40100001	40120000	-0.778719
7	39620001	39640000	7	40080001	40100000	-0.790197
7	39620001	39640000	7	40000001	40020000	-0.878649
7	39620001	39640000	7	39960001	39980000	-0.889259
7	39620001	39640000	7	39780001	39800000	-0.601189
7	39600001	39620000	7	40160001	40180000	-0.846714
7	39600001	39620000	7	40100001	40120000	-0.811195
7	39600001	39620000	7	40080001	40100000	-0.836191
7	39600001	39620000	7	39980001	40000000	-0.936054
7	39600001	39620000	7	39900001	39920000	-0.761823
7	38840001	38860000	7	39560001	39580000	-0.711339
7	38840001	38860000	7	39480001	39500000	-0.76734
7	38820001	38840000	7	39560001	39580000	-0.743487
7	38820001	38840000	7	39540001	39560000	-0.719695
7	38820001	38840000	7	39480001	39500000	-0.758296
7	38220001	38240000	7	38380001	38400000	-0.624776
7	360001	380000	7	800001	820000	-0.649423
7	36020001	36040000	7	36320001	36340000	-0.922172
7	36000001	36020000	7	36320001	36340000	-0.950502
7	35940001	35960000	7	36340001	36360000	-0.939897
7	35940001	35960000	7	36320001	36340000	-0.919712
7	35740001	35760000	7	35920001	35940000	-0.74707
7	35740001	35760000	7	35840001	35860000	-0.60198
7	35720001	35740000	7	35920001	35940000	-0.831732
7	35700001	35720000	7	35920001	35940000	-0.816777
7	35680001	35700000	7	35940001	35960000	-0.836833
7	35680001	35700000	7	35920001	35940000	-0.877432
7	3340001	3360000	7	3940001	3960000	-0.916131
7	3340001	3360000	7	3920001	3940000	-0.927676
7	3340001	3360000	7	3700001	3720000	-0.728312
7	3320001	3340000	7	3940001	3960000	-0.914841
7	3320001	3340000	7	3920001	3940000	-0.915012
7	3320001	3340000	7	3700001	3720000	-0.744127
7	32920001	32940000	7	33080001	33100000	-0.857156
7	32900001	32920000	7	33080001	33100000	-0.872749
7	32880001	32900000	7	33140001	33160000	-0.860822
7	32880001	32900000	7	33120001	33140000	-0.86855
7	32880001	32900000	7	33100001	33120000	-0.853835
7	32880001	32900000	7	33060001	33080000	-0.89743
7	32880001	32900000	7	32980001	33000000	-0.792556
7	32880001	32900000	7	32960001	32980000	-0.741642
7	32540001	32560000	7	33140001	33160000	-0.684634
7	32520001	32540000	7	33160001	33180000	-0.673677
7	32520001	32540000	7	33140001	33160000	-0.6509
7	32520001	32540000	7	33100001	33120000	-0.613405
7	30620001	30640000	7	30780001	30800000	-0.60917
7	30320001	30340000	7	30620001	30640000	-0.848652
7	30320001	30340000	7	30600001	30620000	-0.85276
7	30320001	30340000	7	30520001	30540000	-0.641066
7	30300001	30320000	7	30600001	30620000	-0.825363
7	30300001	30320000	7	30520001	30540000	-0.639329
7	30200001	30220000	7	30300001	30320000	-0.807063
7	30180001	30200000	7	30760001	30780000	-0.911417
7	30180001	30200000	7	30620001	30640000	-0.813095
7	30180001	30200000	7	30600001	30620000	-0.813296
7	30180001	30200000	7	30380001	30400000	-0.704555
7	30180001	30200000	7	30320001	30340000	-0.863233
7	30180001	30200000	7	30300001	30320000	-0.910647
7	30160001	30180000	7	30760001	30780000	-0.917471
7	30160001	30180000	7	30600001	30620000	-0.830439
7	30080001	30100000	7	30780001	30800000	-0.949046
7	30060001	30080000	7	30600001	30620000	-0.883671
7	30060001	30080000	7	30540001	30560000	-0.892598
7	30060001	30080000	7	30320001	30340000	-0.903095
7	2920001	2940000	7	3940001	3960000	-0.905078
7	2920001	2940000	7	3920001	3940000	-0.881797
7	2920001	2940000	7	3180001	3200000	-0.904702
7	2900001	2920000	7	3920001	3940000	-0.862932
7	2900001	2920000	7	3180001	3200000	-0.912998
7	28960001	28980000	7	29440001	29460000	-0.634783
7	28960001	28980000	7	29420001	29440000	-0.613183
7	28940001	28960000	7	29440001	29460000	-0.614797
7	2880001	2900000	7	3920001	3940000	-0.885762
7	27620001	27640000	7	28040001	28060000	-0.614602
7	27240001	27260000	7	28120001	28140000	-0.646464
7	27240001	27260000	7	28100001	28120000	-0.632788
7	27240001	27260000	7	28060001	28080000	-0.66533
7	27240001	27260000	7	28040001	28060000	-0.666489
7	27240001	27260000	7	28000001	28020000	-0.651386
7	27240001	27260000	7	27960001	27980000	-0.629501
7	27240001	27260000	7	27940001	27960000	-0.640274
7	27220001	27240000	7	28120001	28140000	-0.649517
7	27220001	27240000	7	28100001	28120000	-0.618565
7	27220001	27240000	7	28060001	28080000	-0.655491
7	26880001	26900000	7	27180001	27200000	-0.651385
7	26700001	26720000	7	27200001	27220000	-0.667788
7	26420001	26440000	7	27180001	27200000	-0.635098
7	26240001	26260000	7	26400001	26420000	-0.746649
7	26240001	26260000	7	26380001	26400000	-0.785809
7	26240001	26260000	7	26320001	26340000	-0.794981
7	26220001	26240000	7	26400001	26420000	-0.753129
7	26120001	26140000	7	26700001	26720000	-0.812768
7	26120001	26140000	7	26400001	26420000	-0.912155
7	26120001	26140000	7	26380001	26400000	-0.933691
7	26120001	26140000	7	26320001	26340000	-0.90247
7	26100001	26120000	7	26700001	26720000	-0.764981
7	26100001	26120000	7	26680001	26700000	-0.816077
7	26100001	26120000	7	26400001	26420000	-0.877124
7	26100001	26120000	7	26320001	26340000	-0.852645
7	26000001	26020000	7	26400001	26420000	-0.818736
7	25980001	26000000	7	27200001	27220000	-0.633182
7	25980001	26000000	7	27180001	27200000	-0.662943
7	25940001	25960000	7	26540001	26560000	-0.802184
7	25920001	25940000	7	26880001	26900000	-0.696093
7	25920001	25940000	7	26700001	26720000	-0.684058
7	25920001	25940000	7	26400001	26420000	-0.784607
7	25920001	25940000	7	26100001	26120000	-0.65191
7	25900001	25920000	7	27200001	27220000	-0.737933
7	25900001	25920000	7	27120001	27140000	-0.662038
7	25900001	25920000	7	26900001	26920000	-0.661999
7	25900001	25920000	7	26720001	26740000	-0.700256
7	25900001	25920000	7	26700001	26720000	-0.675528
7	25880001	25900000	7	27260001	27280000	-0.773519
7	25880001	25900000	7	27220001	27240000	-0.758061
7	25880001	25900000	7	27120001	27140000	-0.688901
7	25880001	25900000	7	27040001	27060000	-0.66253
7	25880001	25900000	7	26880001	26900000	-0.606765
7	2500001	2520000	7	2720001	2740000	-0.711939
7	2480001	2500000	7	2720001	2740000	-0.705056
7	24840001	24860000	7	25120001	25140000	-0.803604
7	24840001	24860000	7	25100001	25120000	-0.746842
7	23900001	23920000	7	24700001	24720000	-0.707888
7	23900001	23920000	7	24680001	24700000	-0.671699
7	23880001	23900000	7	24700001	24720000	-0.795264
7	23860001	23880000	7	24500001	24520000	-0.605732
7	23820001	23840000	7	24600001	24620000	-0.731528
7	23760001	23780000	7	24700001	24720000	-0.88475
7	23740001	23760000	7	24700001	24720000	-0.89363
7	23720001	23740000	7	25140001	25160000	-0.61618
7	23720001	23740000	7	24700001	24720000	-0.893446
7	23720001	23740000	7	24620001	24640000	-0.891545
7	23720001	23740000	7	24600001	24620000	-0.842173
7	23620001	23640000	7	25140001	25160000	-0.82398
7	23620001	23640000	7	24620001	24640000	-0.993652
7	23600001	23620000	7	25160001	25180000	-0.710145
7	23600001	23620000	7	25140001	25160000	-0.796845
7	23600001	23620000	7	24700001	24720000	-0.930398
7	23600001	23620000	7	24660001	24680000	-0.965069
7	23600001	23620000	7	24620001	24640000	-0.98699
7	23600001	23620000	7	24600001	24620000	-0.968739
7	23580001	23600000	7	25160001	25180000	-0.679465
7	23580001	23600000	7	25140001	25160000	-0.756008
7	23580001	23600000	7	25120001	25140000	-0.786414
7	23580001	23600000	7	24700001	24720000	-0.919334
7	23580001	23600000	7	24600001	24620000	-0.936591
7	23560001	23580000	7	25160001	25180000	-0.697043
7	23560001	23580000	7	25020001	25040000	-0.734063
7	23560001	23580000	7	24600001	24620000	-0.91703
7	23340001	23360000	7	25160001	25180000	-0.698381
7	23320001	23340000	7	25180001	25200000	-0.888541
7	23320001	23340000	7	23560001	23580000	-0.8658
7	23320001	23340000	7	23540001	23560000	-0.859931
7	23320001	23340000	7	23520001	23540000	-0.883119
7	23300001	23320000	7	23560001	23580000	-0.887629
7	23300001	23320000	7	23540001	23560000	-0.882038
7	23300001	23320000	7	23500001	23520000	-0.890106
7	23300001	23320000	7	23380001	23400000	-0.729565
7	23140001	23160000	7	23220001	23240000	-0.821624
7	23120001	23140000	7	23220001	23240000	-0.681901
7	22880001	22900000	7	23080001	23100000	-0.708418
7	22880001	22900000	7	23060001	23080000	-0.674602
7	22880001	22900000	7	23040001	23060000	-0.670442
7	22860001	22880000	7	23140001	23160000	-0.800672
7	22860001	22880000	7	23080001	23100000	-0.731527
7	22840001	22860000	7	23080001	23100000	-0.712307
7	22780001	22800000	7	23080001	23100000	-0.689747
7	22760001	22780000	7	23080001	23100000	-0.632814
7	22600001	22620000	7	23100001	23120000	-0.726391
7	22600001	22620000	7	23080001	23100000	-0.869378
7	22140001	22160000	7	23100001	23120000	-0.755869
7	22140001	22160000	7	23080001	23100000	-0.655029
7	21300001	21320000	7	22020001	22040000	-0.670304
7	21300001	21320000	7	21560001	21580000	-0.664377
7	21280001	21300000	7	22040001	22060000	-0.683774
7	21280001	21300000	7	22020001	22040000	-0.687868
7	21280001	21300000	7	21540001	21560000	-0.601607
7	21240001	21260000	7	22060001	22080000	-0.695744
7	21140001	21160000	7	22060001	22080000	-0.665544
6	19940001	19960000	6	21660001	21680000	0.634091
6	19300001	19320000	6	19400001	19420000	-0.812872
6	18160001	18180000	6	18260001	18280000	-0.617399
6	18160001	18180000	6	18240001	18260000	-0.619628
6	18140001	18160000	6	18260001	18280000	-0.785868
6	18140001	18160000	6	18240001	18260000	-0.754975
6	17700001	17720000	6	18140001	18160000	-0.960113
6	17600001	17620000	6	18140001	18160000	-0.825723
6	17600001	17620000	6	17700001	17720000	-0.879135
6	17600001	17620000	6	17680001	17700000	-0.86364
6	17580001	17600000	6	18140001	18160000	-0.756057
6	17580001	17600000	6	17800001	17820000	-0.925688
6	17580001	17600000	6	17700001	17720000	-0.875908
6	17580001	17600000	6	17680001	17700000	-0.889322
6	17560001	17580000	6	17800001	17820000	-0.895416
6	17160001	17180000	6	18500001	18520000	-0.677061
6	170600001	170620000	6	170860001	170880000	-0.693984
6	170600001	170620000	6	170840001	170860000	-0.878217
6	170240001	170260000	6	170780001	170800000	-0.822623
6	170220001	170240000	6	170820001	170840000	-0.880841
6	170200001	170220000	6	170820001	170840000	-0.89873
6	170180001	170200000	6	170840001	170860000	-0.890943
6	170160001	170180000	6	170820001	170840000	-0.945664
6	170140001	170160000	6	170840001	170860000	-0.909112
6	170120001	170140000	6	170600001	170620000	-0.985596
6	168780001	168800000	6	169280001	169300000	0.656455
6	168760001	168780000	6	169280001	169300000	0.610191
[truncated: 9,130 more rows]

## Sheet: Table S4-2
Table S4. loops that strength corrlelation with clinical parameters of SLE patients
Table S4-2. loops that strength corrlelation with C4 level of SLE patients
chrA	start	end	chrB	start	end	The correlation coefficient
10	17640001	17660000	10	18380001	18400000	-0.672315
10	15900001	15920000	10	17640001	17660000	-0.67094
10	14600001	14620000	10	15120001	15140000	-0.715147
10	14600001	14620000	10	14680001	14700000	0.669482
10	14240001	14260000	10	14860001	14880000	0.760362
10	14220001	14240000	10	15020001	15040000	0.6797
10	14220001	14240000	10	14860001	14880000	0.700054
10	14220001	14240000	10	14840001	14860000	0.715232
10	14220001	14240000	10	14660001	14680000	0.829447
10	13820001	13840000	10	14860001	14880000	0.788184
10	13820001	13840000	10	14840001	14860000	0.789754
10	13820001	13840000	10	14580001	14600000	0.914985
10	13700001	13720000	10	13800001	13820000	0.656869
10	134200001	134220000	10	134440001	134460000	0.610396
10	134180001	134200000	10	134440001	134460000	0.626313
10	134040001	134060000	10	134440001	134460000	0.719069
10	134020001	134040000	10	134440001	134460000	0.670535
10	13360001	13380000	10	15140001	15160000	0.716469
10	126220001	126240000	10	126320001	126340000	0.870531
10	126220001	126240000	10	126300001	126320000	0.726493
10	124900001	124920000	10	125000001	125020000	0.787072
10	124100001	124120000	10	124180001	124200000	-0.664177
10	124080001	124100000	10	124200001	124220000	-0.658055
10	124080001	124100000	10	124180001	124200000	-0.692238
10	124060001	124080000	10	124200001	124220000	-0.695788
10	120820001	120840000	10	120920001	120940000	-0.652794
10	120820001	120840000	10	120900001	120920000	-0.680735
10	120800001	120820000	10	120900001	120920000	-0.705341
10	118960001	118980000	10	120000001	120020000	-0.76986
10	118960001	118980000	10	119980001	120000000	-0.767514
10	118900001	118920000	10	119300001	119320000	-0.84269
10	11820001	11840000	10	12020001	12040000	-0.78041
10	116220001	116240000	10	116300001	116320000	0.653593
10	11340001	11360000	10	11500001	11520000	0.782824
10	11340001	11360000	10	11480001	11500000	0.76714
10	112560001	112580000	10	112640001	112660000	0.717873
10	112520001	112540000	10	112640001	112660000	0.690153
10	112520001	112540000	10	112620001	112640000	0.779933
10	112500001	112520000	10	112640001	112660000	0.713439
10	112340001	112360000	10	114180001	114200000	0.618166
10	112080001	112100000	10	112300001	112320000	-0.687425
10	112060001	112080000	10	112300001	112320000	-0.686239
10	111640001	111660000	10	111860001	111880000	-0.683214
10	11140001	11160000	10	11500001	11520000	0.659568
10	103920001	103940000	10	104940001	104960000	0.818616
10	101180001	101200000	10	101480001	101500000	-0.671601
10	101160001	101180000	10	101460001	101480000	-0.784651
10	99440001	99460000	10	99620001	99640000	0.662507
10	98380001	98400000	10	98580001	98600000	-0.737641
10	97980001	98000000	10	98080001	98100000	0.687494
10	960001	980000	10	1100001	1120000	-0.672621
10	960001	980000	10	1080001	1100000	-0.635332
10	97800001	97820000	10	97900001	97920000	0.616294
10	91120001	91140000	10	91320001	91340000	-0.660509
10	91020001	91040000	10	91460001	91480000	-0.746191
10	91020001	91040000	10	91440001	91460000	-0.731336
10	91000001	91020000	10	91460001	91480000	-0.720972
10	90580001	90600000	10	90680001	90700000	0.700954
10	9020001	9040000	10	9220001	9240000	0.768922
10	89620001	89640000	10	89840001	89860000	0.633705
10	89600001	89620000	10	90320001	90340000	0.61716
10	89600001	89620000	10	90300001	90320000	0.600987
10	89580001	89600000	10	90320001	90340000	0.615795
10	87260001	87280000	10	87520001	87540000	0.759432
10	87180001	87200000	10	87520001	87540000	0.668607
10	86720001	86740000	10	87260001	87280000	-0.747764
10	78940001	78960000	10	79380001	79400000	-0.715957
10	78920001	78940000	10	79400001	79420000	-0.699348
10	78920001	78940000	10	79380001	79400000	-0.699084
10	7560001	7580000	10	7720001	7740000	0.61887
10	75640001	75660000	10	75840001	75860000	-0.614157
10	75640001	75660000	10	75820001	75840000	-0.644759
10	75620001	75640000	10	75820001	75840000	-0.741054
10	74120001	74140000	10	74800001	74820000	-0.63011
10	74120001	74140000	10	74580001	74600000	-0.626861
10	74120001	74140000	10	74440001	74460000	-0.686436
10	74120001	74140000	10	74420001	74440000	-0.683705
10	74120001	74140000	10	74380001	74400000	-0.727223
10	73880001	73900000	10	74080001	74100000	0.822834
10	73860001	73880000	10	74080001	74100000	0.781029
10	73840001	73860000	10	74080001	74100000	0.791392
10	73820001	73840000	10	74080001	74100000	0.686654
10	70740001	70760000	10	71140001	71160000	-0.666452
10	70720001	70740000	10	70940001	70960000	-0.694489
10	70520001	70540000	10	70700001	70720000	0.650152
10	70500001	70520000	10	70700001	70720000	0.640459
10	70500001	70520000	10	70680001	70700000	0.63993
10	69680001	69700000	10	70680001	70700000	0.609605
10	69660001	69680000	10	70680001	70700000	0.695525
10	69640001	69660000	10	70680001	70700000	0.70482
10	69640001	69660000	10	70660001	70680000	0.643422
10	6840001	6860000	10	7460001	7480000	-0.666926
10	6480001	6500000	10	6700001	6720000	-0.636888
10	6460001	6480000	10	6700001	6720000	-0.792766
10	55480001	55500000	10	55720001	55740000	0.601637
10	5480001	5500000	10	5660001	5680000	0.73037
10	5480001	5500000	10	5640001	5660000	0.812983
10	53700001	53720000	10	53980001	54000000	0.613243
10	53380001	53400000	10	53660001	53680000	0.611573
10	50600001	50620000	10	50700001	50720000	-0.629116
10	50180001	50200000	10	50360001	50380000	0.616969
10	48440001	48460000	10	48640001	48660000	0.618927
10	48420001	48440000	10	48620001	48640000	0.847522
10	45740001	45760000	10	45920001	45940000	0.699708
10	44200001	44220000	10	44500001	44520000	0.623343
10	44180001	44200000	10	44660001	44680000	0.601685
10	44180001	44200000	10	44520001	44540000	0.697298
10	43020001	43040000	10	44080001	44100000	-0.811406
10	380001	400000	10	500001	520000	0.871173
10	3840001	3860000	10	4000001	4020000	-0.753099
10	3820001	3840000	10	4000001	4020000	-0.767671
10	35480001	35500000	10	35620001	35640000	-0.638726
10	33300001	33320000	10	33420001	33440000	-0.825159
10	33280001	33300000	10	33420001	33440000	-0.823209
10	33260001	33280000	10	33420001	33440000	-0.808597
10	33240001	33260000	10	33420001	33440000	-0.827591
10	33220001	33240000	10	33420001	33440000	-0.845729
10	33220001	33240000	10	33400001	33420000	-0.836408
10	33200001	33220000	10	33420001	33440000	-0.836302
10	33080001	33100000	10	33440001	33460000	-0.940407
10	32980001	33000000	10	34620001	34640000	-0.624769
10	3260001	3280000	10	4800001	4820000	-0.714999
10	32740001	32760000	10	33420001	33440000	-0.699437
10	32720001	32740000	10	33420001	33440000	-0.679625
10	32660001	32680000	10	33420001	33440000	-0.690679
10	32640001	32660000	10	33420001	33440000	-0.709706
10	3240001	3260000	10	4820001	4840000	-0.774131
10	3240001	3260000	10	4800001	4820000	-0.738849
10	32540001	32560000	10	32640001	32660000	-0.641558
10	32540001	32560000	10	32620001	32640000	-0.65109
10	30660001	30680000	10	30940001	30960000	-0.608869
10	27720001	27740000	10	27940001	27960000	0.919579
10	27440001	27460000	10	27520001	27540000	-0.606259
10	27160001	27180000	10	27640001	27660000	-0.674178
10	27160001	27180000	10	27620001	27640000	-0.67148
10	24900001	24920000	10	25000001	25020000	0.794308
10	23800001	23820000	10	23960001	23980000	0.774383
10	23800001	23820000	10	23940001	23960000	0.744422
10	23600001	23620000	10	23980001	24000000	0.608423
10	23580001	23600000	10	23980001	24000000	0.665279
10	23580001	23600000	10	23960001	23980000	0.632299
10	23440001	23460000	10	23980001	24000000	0.862459
10	22880001	22900000	10	22980001	23000000	-0.727616
10	22280001	22300000	10	22980001	23000000	-0.713646
10	22280001	22300000	10	22620001	22640000	-0.636222
10	200001	220000	10	540001	560000	0.660626
10	21800001	21820000	10	22720001	22740000	-0.720648
10	21800001	21820000	10	22620001	22640000	-0.742188
10	21800001	21820000	10	22600001	22620000	-0.801273
10	21800001	21820000	10	22520001	22540000	-0.80779
10	21780001	21800000	10	22520001	22540000	-0.868421
9	1940001	1960000	9	2060001	2080000	-0.612047
9	140180001	140200000	9	140420001	140440000	-0.650832
9	139740001	139760000	9	139920001	139940000	-0.690973
9	139680001	139700000	9	140120001	140140000	-0.606421
9	137340001	137360000	9	138300001	138320000	-0.758013
9	136880001	136900000	9	137340001	137360000	-0.652692
9	136460001	136480000	9	136580001	136600000	0.708029
9	136440001	136460000	9	136600001	136620000	0.714165
9	136440001	136460000	9	136580001	136600000	0.744087
9	136400001	136420000	9	136600001	136620000	0.732992
9	136380001	136400000	9	136600001	136620000	0.810335
9	136380001	136400000	9	136580001	136600000	0.828321
9	134460001	134480000	9	135120001	135140000	-0.73831
9	134440001	134460000	9	135120001	135140000	-0.76873
9	13420001	13440000	9	14420001	14440000	-0.723898
9	13420001	13440000	9	14360001	14380000	-0.781774
9	13420001	13440000	9	14340001	14360000	-0.792954
9	134220001	134240000	9	134600001	134620000	-0.604993
9	133980001	134000000	9	135280001	135300000	-0.771748
9	133920001	133940000	9	134200001	134220000	-0.669847
9	133040001	133060000	9	133760001	133780000	-0.707869
9	132400001	132420000	9	132540001	132560000	0.72417
9	130700001	130720000	9	130860001	130880000	0.688621
9	130700001	130720000	9	130840001	130860000	0.697508
9	130700001	130720000	9	130800001	130820000	0.696446
9	130700001	130720000	9	130780001	130800000	0.699787
9	127940001	127960000	9	128020001	128040000	0.896587
9	126880001	126900000	9	127080001	127100000	-0.649345
9	126880001	126900000	9	127060001	127080000	-0.654943
9	119260001	119280000	9	119580001	119600000	0.845705
9	117660001	117680000	9	117760001	117780000	0.613889
9	117500001	117520000	9	117660001	117680000	-0.713316
9	117480001	117500000	9	117660001	117680000	-0.746543
9	114860001	114880000	9	115100001	115120000	-0.631485
9	110220001	110240000	9	111320001	111340000	-0.658466
9	106860001	106880000	9	108460001	108480000	0.601354
9	100700001	100720000	9	100780001	100800000	0.73571
9	100680001	100700000	9	100800001	100820000	0.626046
9	100680001	100700000	9	100780001	100800000	0.753942
9	100460001	100480000	9	100760001	100780000	0.680956
9	100460001	100480000	9	100660001	100680000	0.700997
9	99540001	99560000	9	100340001	100360000	-0.645204
9	98260001	98280000	9	98480001	98500000	0.659554
9	95920001	95940000	9	96700001	96720000	-0.648362
9	95900001	95920000	9	96060001	96080000	0.695789
9	95880001	95900000	9	96060001	96080000	0.710482
9	95860001	95880000	9	96060001	96080000	0.705164
9	95760001	95780000	9	96060001	96080000	0.833314
9	95740001	95760000	9	95840001	95860000	0.840206
9	95740001	95760000	9	95820001	95840000	0.834913
9	95720001	95740000	9	95900001	95920000	0.683881
9	95720001	95740000	9	95800001	95820000	0.91496
9	95580001	95600000	9	96060001	96080000	0.605318
9	95080001	95100000	9	95400001	95420000	-0.676417
9	95060001	95080000	9	95400001	95420000	-0.66304
9	94900001	94920000	9	95540001	95560000	-0.798148
9	94900001	94920000	9	95400001	95420000	-0.61892
9	94880001	94900000	9	95540001	95560000	-0.801929
9	94880001	94900000	9	95400001	95420000	-0.609802
9	94540001	94560000	9	94700001	94720000	-0.739209
9	94520001	94540000	9	94720001	94740000	-0.712247
9	94220001	94240000	9	94420001	94440000	-0.629309
9	93780001	93800000	9	94200001	94220000	-0.607765
9	93680001	93700000	9	94480001	94500000	-0.656801
9	93680001	93700000	9	94180001	94200000	-0.625529
9	93660001	93680000	9	94480001	94500000	-0.684364
9	93660001	93680000	9	94180001	94200000	-0.687585
9	92040001	92060000	9	92140001	92160000	0.653428
9	89080001	89100000	9	89920001	89940000	-0.644476
9	88420001	88440000	9	88560001	88580000	-0.645709
9	88340001	88360000	9	88540001	88560000	-0.620999
9	88300001	88320000	9	88400001	88420000	-0.603215
9	88180001	88200000	9	88400001	88420000	-0.75139
9	88160001	88180000	9	88380001	88400000	-0.787586
9	79060001	79080000	9	79300001	79320000	-0.776677
9	79060001	79080000	9	79280001	79300000	-0.80233
9	79040001	79060000	9	79300001	79320000	-0.797985
9	79040001	79060000	9	79280001	79300000	-0.821942
9	79000001	79020000	9	79320001	79340000	-0.782766
9	78480001	78500000	9	78900001	78920000	0.657922
9	78460001	78480000	9	78920001	78940000	0.653038
9	78460001	78480000	9	78900001	78920000	0.66612
9	77860001	77880000	9	78900001	78920000	0.618016
9	77820001	77840000	9	78460001	78480000	0.736859
9	77560001	77580000	9	77680001	77700000	-0.625023
9	77380001	77400000	9	77820001	77840000	-0.621058
9	77380001	77400000	9	77800001	77820000	-0.683281
9	77380001	77400000	9	77780001	77800000	-0.685433
9	77380001	77400000	9	77680001	77700000	-0.766191
9	77380001	77400000	9	77660001	77680000	-0.728884
9	77380001	77400000	9	77600001	77620000	-0.663508
9	74900001	74920000	9	75200001	75220000	-0.695469
9	74400001	74420000	9	74500001	74520000	0.603125
9	74240001	74260000	9	74360001	74380000	-0.821704
9	74220001	74240000	9	74420001	74440000	-0.899037
9	74220001	74240000	9	74380001	74400000	-0.897423
9	74220001	74240000	9	74360001	74380000	-0.849594
9	74220001	74240000	9	74320001	74340000	-0.665509
9	74200001	74220000	9	74420001	74440000	-0.917708
9	72940001	72960000	9	73100001	73120000	-0.650064
9	72880001	72900000	9	73200001	73220000	-0.695889
9	72860001	72880000	9	73220001	73240000	-0.649412
9	72860001	72880000	9	73200001	73220000	-0.74438
9	72800001	72820000	9	73200001	73220000	-0.615131
9	72040001	72060000	9	72160001	72180000	0.804817
9	72020001	72040000	9	72160001	72180000	0.821043
9	71420001	71440000	9	71600001	71620000	0.658893
9	71380001	71400000	9	71600001	71620000	0.604623
9	71200001	71220000	9	71360001	71380000	0.686688
9	6040001	6060000	9	6300001	6320000	-0.677142
9	5460001	5480000	9	5560001	5580000	0.616987
9	4760001	4780000	9	5600001	5620000	-0.703988
9	4760001	4780000	9	5580001	5600000	-0.69614
9	4760001	4780000	9	5440001	5460000	-0.73296
9	4760001	4780000	9	5420001	5440000	-0.786641
9	4760001	4780000	9	4980001	5000000	-0.830662
9	4760001	4780000	9	4960001	4980000	-0.842489
9	4740001	4760000	9	5600001	5620000	-0.668783
9	4740001	4760000	9	5440001	5460000	-0.714023
9	35780001	35800000	9	36020001	36040000	0.88827
9	35760001	35780000	9	35880001	35900000	0.691771
9	31140001	31160000	9	31700001	31720000	0.696309
9	31120001	31140000	9	31800001	31820000	0.73269
9	26740001	26760000	9	27280001	27300000	0.757071
9	26720001	26740000	9	27260001	27280000	0.873636
9	21700001	21720000	9	21780001	21800000	0.710653
8	18760001	18780000	8	19760001	19780000	0.61317
8	18620001	18640000	8	19960001	19980000	0.643198
8	1840001	1860000	8	1960001	1980000	0.846163
8	1820001	1840000	8	1960001	1980000	0.761373
8	17580001	17600000	8	17760001	17780000	0.661052
8	17560001	17580000	8	17760001	17780000	0.678927
8	17460001	17480000	8	17940001	17960000	0.843498
8	17460001	17480000	8	17920001	17940000	0.859193
8	17440001	17460000	8	17760001	17780000	0.71089
8	17440001	17460000	8	17740001	17760000	0.710366
8	17440001	17460000	8	17560001	17580000	0.779222
8	17440001	17460000	8	17540001	17560000	0.800987
8	17180001	17200000	8	17560001	17580000	0.68604
8	17180001	17200000	8	17540001	17560000	0.709842
8	17080001	17100000	8	17560001	17580000	0.828843
8	16300001	16320000	8	16500001	16520000	-0.751401
8	143860001	143880000	8	144100001	144120000	-0.60989
8	143840001	143860000	8	144120001	144140000	-0.635611
8	143740001	143760000	8	144340001	144360000	-0.614688
8	142080001	142100000	8	142180001	142200000	-0.77731
8	142080001	142100000	8	142160001	142180000	-0.719436
8	141460001	141480000	8	142400001	142420000	0.690621
8	140720001	140740000	8	141640001	141660000	-0.685363
8	134580001	134600000	8	134880001	134900000	-0.773812
8	134500001	134520000	8	134900001	134920000	-0.784246
8	134500001	134520000	8	134880001	134900000	-0.807249
8	134480001	134500000	8	134880001	134900000	-0.730354
8	134220001	134240000	8	134440001	134460000	-0.629858
8	130840001	130860000	8	131000001	131020000	-0.731671
8	130820001	130840000	8	130900001	130920000	-0.62775
8	128180001	128200000	8	129580001	129600000	0.611739
8	125560001	125580000	8	126440001	126460000	-0.869476
8	124260001	124280000	8	124420001	124440000	-0.645666
8	124260001	124280000	8	124400001	124420000	-0.631968
8	118480001	118500000	8	119120001	119140000	0.646852
8	118460001	118480000	8	119120001	119140000	0.69112
8	118340001	118360000	8	119120001	119140000	0.699472
8	11640001	11660000	8	11720001	11740000	-0.699504
8	11600001	11620000	8	11800001	11820000	-0.833713
8	11600001	11620000	8	11780001	11800000	-0.804588
8	11600001	11620000	8	11760001	11780000	-0.637122
8	109240001	109260000	8	109480001	109500000	-0.60442
8	109060001	109080000	8	109500001	109520000	-0.6521
8	108920001	108940000	8	109500001	109520000	-0.64493
8	107180001	107200000	8	107580001	107600000	0.687308
8	104780001	104800000	8	105440001	105460000	-0.684402
8	10440001	10460000	8	10680001	10700000	-0.630235
8	10440001	10460000	8	10660001	10680000	-0.658928
8	103660001	103680000	8	103820001	103840000	-0.683557
8	103660001	103680000	8	103800001	103820000	-0.689133
8	103400001	103420000	8	103840001	103860000	-0.649998
8	102680001	102700000	8	103180001	103200000	-0.791938
8	102660001	102680000	8	103200001	103220000	-0.811528
8	102660001	102680000	8	103180001	103200000	-0.791603
8	102640001	102660000	8	103180001	103200000	-0.768689
8	102520001	102540000	8	103180001	103200000	-0.732075
8	102320001	102340000	8	103280001	103300000	-0.653354
8	102320001	102340000	8	103260001	103280000	-0.623607
8	101580001	101600000	8	101700001	101720000	0.62347
8	101560001	101580000	8	101720001	101740000	0.602719
8	101300001	101320000	8	101520001	101540000	-0.646795
8	101160001	101180000	8	102220001	102240000	0.600125
8	99960001	99980000	8	100360001	100380000	-0.60966
8	94840001	94860000	8	94960001	94980000	-0.665203
8	94820001	94840000	8	94960001	94980000	-0.623194
8	94760001	94780000	8	96140001	96160000	0.807034
8	94700001	94720000	8	94960001	94980000	-0.644135
8	92800001	92820000	8	92920001	92940000	0.696379
8	90240001	90260000	8	90620001	90640000	0.610394
8	8980001	9000000	8	9680001	9700000	-0.629455
8	8920001	8940000	8	9000001	9020000	-0.762109
8	8900001	8920000	8	9000001	9020000	-0.768689
8	87140001	87160000	8	87500001	87520000	0.675937
8	8600001	8620000	8	9680001	9700000	-0.709695
8	8580001	8600000	8	9680001	9700000	-0.701431
8	80980001	81000000	8	81860001	81880000	0.676577
8	80980001	81000000	8	81420001	81440000	0.619977
8	80980001	81000000	8	81400001	81420000	0.690071
8	80980001	81000000	8	81380001	81400000	0.723168
8	80960001	80980000	8	81400001	81420000	0.66544
8	79420001	79440000	8	79560001	79580000	0.890561
8	79420001	79440000	8	79540001	79560000	0.857541
8	79420001	79440000	8	79520001	79540000	0.76787
8	79400001	79420000	8	79560001	79580000	0.860459
8	79400001	79420000	8	79540001	79560000	0.837975
8	79400001	79420000	8	79520001	79540000	0.738201
8	77840001	77860000	8	77960001	77980000	-0.673505
8	77300001	77320000	8	78280001	78300000	-0.640104
8	75280001	75300000	8	75760001	75780000	-0.692277
8	75280001	75300000	8	75740001	75760000	-0.729934
8	75260001	75280000	8	75760001	75780000	-0.709544
8	74780001	74800000	8	74880001	74900000	-0.738326
8	74780001	74800000	8	74860001	74880000	-0.800913
8	74200001	74220000	8	74560001	74580000	-0.600691
8	72740001	72760000	8	73060001	73080000	-0.614278
8	71500001	71520000	8	71580001	71600000	0.678404
8	71500001	71520000	8	71560001	71580000	0.679403
8	71480001	71500000	8	71580001	71600000	0.608367
8	71480001	71500000	8	71560001	71580000	0.657467
8	70860001	70880000	8	71580001	71600000	-0.824197
8	70840001	70860000	8	71620001	71640000	-0.776805
8	70840001	70860000	8	71600001	71620000	-0.809593
8	70840001	70860000	8	71460001	71480000	-0.649499
8	67580001	67600000	8	67980001	68000000	-0.655833
8	67580001	67600000	8	67960001	67980000	-0.669508
8	67340001	67360000	8	68400001	68420000	-0.745251
8	67340001	67360000	8	68120001	68140000	-0.823376
8	66540001	66560000	8	67540001	67560000	0.671367
8	61580001	61600000	8	61720001	61740000	0.605952
8	56720001	56740000	8	56920001	56940000	-0.693031
8	56700001	56720000	8	56960001	56980000	-0.727433
8	56700001	56720000	8	56940001	56960000	-0.722504
8	56680001	56700000	8	56980001	57000000	-0.72698
8	56680001	56700000	8	56960001	56980000	-0.707381
8	56680001	56700000	8	56940001	56960000	-0.716007
8	53660001	53680000	8	53840001	53860000	0.66906
8	53640001	53660000	8	53840001	53860000	0.65686
8	53500001	53520000	8	53860001	53880000	0.685827
8	53500001	53520000	8	53840001	53860000	0.677441
8	53480001	53500000	8	53840001	53860000	0.627893
8	52560001	52580000	8	52920001	52940000	0.619311
8	48220001	48240000	8	48640001	48660000	-0.810311
8	48200001	48220000	8	48660001	48680000	-0.843471
8	48200001	48220000	8	48640001	48660000	-0.834542
8	48180001	48200000	8	48660001	48680000	-0.839742
8	42020001	42040000	8	42240001	42260000	-0.690973
8	42020001	42040000	8	42220001	42240000	-0.668186
8	41280001	41300000	8	41380001	41400000	-0.874334
8	41280001	41300000	8	41360001	41380000	-0.839591
8	38680001	38700000	8	38820001	38840000	-0.65524
8	38280001	38300000	8	38580001	38600000	-0.674761
8	38260001	38280000	8	38580001	38600000	-0.754433
8	38260001	38280000	8	38560001	38580000	-0.704497
8	38140001	38160000	8	38220001	38240000	-0.626911
8	38100001	38120000	8	38220001	38240000	-0.623249
8	38040001	38060000	8	38260001	38280000	-0.619243
8	37960001	37980000	8	38840001	38860000	-0.72081
8	37620001	37640000	8	37760001	37780000	-0.746505
8	37600001	37620000	8	38840001	38860000	-0.767177
8	37060001	37080000	8	37540001	37560000	0.846529
8	37020001	37040000	8	37560001	37580000	0.878485
8	37020001	37040000	8	37540001	37560000	0.897287
8	36700001	36720000	8	37920001	37940000	0.709661
8	31660001	31680000	8	32240001	32260000	-0.808688
8	30520001	30540000	8	30660001	30680000	-0.817893
8	29220001	29240000	8	29360001	29380000	-0.782514
8	29200001	29220000	8	29380001	29400000	-0.649279
8	29200001	29220000	8	29360001	29380000	-0.811907
8	29200001	29220000	8	29340001	29360000	-0.886942
8	27980001	28000000	8	28180001	28200000	-0.793886
8	27920001	27940000	8	28280001	28300000	-0.86704
8	27920001	27940000	8	28260001	28280000	-0.869399
8	27920001	27940000	8	28180001	28200000	-0.823183
8	27900001	27920000	8	28440001	28460000	-0.700353
8	27300001	27320000	8	27600001	27620000	-0.62756
8	26220001	26240000	8	26420001	26440000	0.601663
8	25020001	25040000	8	26220001	26240000	-0.743714
8	25020001	25040000	8	26180001	26200000	-0.724619
8	25020001	25040000	8	26160001	26180000	-0.729607
8	25020001	25040000	8	25340001	25360000	-0.71489
8	25020001	25040000	8	25320001	25340000	-0.701604
8	22520001	22540000	8	22600001	22620000	0.6397
8	22480001	22500000	8	22600001	22620000	0.61779
8	22460001	22480000	8	22600001	22620000	0.659522
8	22280001	22300000	8	22400001	22420000	-0.677845
8	20580001	20600000	8	20820001	20840000	0.815328
7	19620001	19640000	7	19920001	19940000	0.609584
7	17820001	17840000	7	18360001	18380000	-0.671626
7	17800001	17820000	7	18380001	18400000	-0.627133
7	17800001	17820000	7	18360001	18380000	-0.629491
7	17720001	17740000	7	18700001	18720000	-0.622992
7	17180001	17200000	7	17320001	17340000	-0.69176
7	17160001	17180000	7	17320001	17340000	-0.794431
7	16120001	16140000	7	16600001	16620000	-0.645166
7	158540001	158560000	7	158640001	158660000	-0.617196
7	158520001	158540000	7	158640001	158660000	-0.686393
7	158500001	158520000	7	158620001	158640000	-0.72152
7	157480001	157500000	7	157660001	157680000	0.630196
7	157440001	157460000	7	157660001	157680000	0.714234
7	157400001	157420000	7	157660001	157680000	0.740423
7	157400001	157420000	7	157640001	157660000	0.82026
7	157240001	157260000	7	157380001	157400000	0.685702
7	157220001	157240000	7	157660001	157680000	0.687834
7	157220001	157240000	7	157640001	157660000	0.704041
7	157220001	157240000	7	157560001	157580000	0.771409
7	157220001	157240000	7	157500001	157520000	0.670997
7	157220001	157240000	7	157480001	157500000	0.641257
7	157220001	157240000	7	157380001	157400000	0.602269
7	157200001	157220000	7	157660001	157680000	0.700056
7	157200001	157220000	7	157640001	157660000	0.712513
7	157140001	157160000	7	157660001	157680000	0.778092
7	157060001	157080000	7	157640001	157660000	0.830651
7	156980001	157000000	7	157700001	157720000	0.840265
7	156780001	156800000	7	157480001	157500000	-0.65314
7	155600001	155620000	7	156780001	156800000	-0.603944
7	154720001	154740000	7	154980001	155000000	-0.621055
7	154720001	154740000	7	154960001	154980000	-0.606791
7	154700001	154720000	7	155120001	155140000	-0.603874
7	154700001	154720000	7	154980001	155000000	-0.669475
7	152120001	152140000	7	152280001	152300000	-0.610467
7	151980001	152000000	7	152140001	152160000	-0.760915
7	151900001	151920000	7	152420001	152440000	-0.705369
7	151880001	151900000	7	152420001	152440000	-0.754734
7	148560001	148580000	7	148640001	148660000	-0.673465
7	148540001	148560000	7	148640001	148660000	-0.689786
7	148480001	148500000	7	148640001	148660000	-0.657441
7	144300001	144320000	7	144920001	144940000	0.704266
7	142220001	142240000	7	142900001	142920000	0.606986
7	142200001	142220000	7	142920001	142940000	0.603616
7	142200001	142220000	7	142900001	142920000	0.621515
7	142180001	142200000	7	142500001	142520000	0.632751
7	142180001	142200000	7	142480001	142500000	0.616205
7	142000001	142020000	7	142520001	142540000	0.908577
7	142000001	142020000	7	142500001	142520000	0.887634
7	139320001	139340000	7	139460001	139480000	0.603414
7	138780001	138800000	7	139020001	139040000	-0.655885
7	138760001	138780000	7	139040001	139060000	-0.639406
7	138560001	138580000	7	138740001	138760000	0.603232
7	138140001	138160000	7	138800001	138820000	0.699684
7	137580001	137600000	7	137680001	137700000	-0.605873
7	136500001	136520000	7	136800001	136820000	-0.826349
7	135560001	135580000	7	135700001	135720000	-0.699621
7	135480001	135500000	7	135700001	135720000	-0.762384
7	135480001	135500000	7	135680001	135700000	-0.784239
7	135240001	135260000	7	135320001	135340000	-0.688725
7	134840001	134860000	7	135660001	135680000	-0.706619
7	13320001	13340000	7	14720001	14740000	-0.673918
7	13320001	13340000	7	14700001	14720000	-0.726392
7	13320001	13340000	7	14500001	14520000	-0.721474
7	13320001	13340000	7	14480001	14500000	-0.689961
7	13300001	13320000	7	14720001	14740000	-0.678852
7	132920001	132940000	7	134000001	134020000	0.602505
7	132760001	132780000	7	134000001	134020000	0.736415
7	132380001	132400000	7	134020001	134040000	0.618129
7	132000001	132020000	7	132260001	132280000	-0.602843
7	131980001	132000000	7	132260001	132280000	-0.643667
7	130760001	130780000	7	131100001	131120000	-0.640409
7	130760001	130780000	7	131080001	131100000	-0.649656
7	130760001	130780000	7	131000001	131020000	-0.765446
7	130740001	130760000	7	131100001	131120000	-0.609912
7	130740001	130760000	7	131060001	131080000	-0.632325
7	130740001	130760000	7	131000001	131020000	-0.769136
7	129480001	129500000	7	129620001	129640000	-0.666235
7	129000001	129020000	7	129640001	129660000	-0.765441
7	129000001	129020000	7	129460001	129480000	-0.747565
7	129000001	129020000	7	129260001	129280000	-0.71357
7	129000001	129020000	7	129100001	129120000	-0.65518
7	128980001	129000000	7	129640001	129660000	-0.783097
7	128540001	128560000	7	128720001	128740000	-0.670178
7	123320001	123340000	7	123500001	123520000	-0.640047
7	123300001	123320000	7	123500001	123520000	-0.605805
7	116480001	116500000	7	117820001	117840000	0.649568
7	116220001	116240000	7	116440001	116460000	-0.90972
7	115900001	115920000	7	116220001	116240000	-0.811198
7	115900001	115920000	7	116200001	116220000	-0.820246
7	115900001	115920000	7	116180001	116200000	-0.775607
7	115900001	115920000	7	116160001	116180000	-0.764932
7	115880001	115900000	7	116460001	116480000	-0.618245
7	115880001	115900000	7	116220001	116240000	-0.790723
7	115820001	115840000	7	116200001	116220000	-0.793852
7	115800001	115820000	7	116460001	116480000	-0.622205
7	115800001	115820000	7	116440001	116460000	-0.683828
7	115800001	115820000	7	116220001	116240000	-0.778934
7	115800001	115820000	7	116200001	116220000	-0.802756
7	115800001	115820000	7	116160001	116180000	-0.847696
7	115800001	115820000	7	116140001	116160000	-0.81096
7	115800001	115820000	7	115880001	115900000	-0.733895
7	115780001	115800000	7	116460001	116480000	-0.663436
7	115780001	115800000	7	116440001	116460000	-0.733849
7	115780001	115800000	7	116220001	116240000	-0.800823
7	115780001	115800000	7	116200001	116220000	-0.827463
7	11460001	11480000	7	12520001	12540000	-0.638164
7	11460001	11480000	7	12360001	12380000	-0.693027
7	114480001	114500000	7	115360001	115380000	-0.916706
7	112420001	112440000	7	112760001	112780000	0.642139
7	112180001	112200000	7	112540001	112560000	-0.666752
7	112180001	112200000	7	112520001	112540000	-0.70376
7	106280001	106300000	7	106380001	106400000	-0.61777
7	105820001	105840000	7	106100001	106120000	-0.683884
7	105820001	105840000	7	106080001	106100000	-0.685123
7	105800001	105820000	7	106100001	106120000	-0.692324
7	105800001	105820000	7	106080001	106100000	-0.705664
7	105400001	105420000	7	105660001	105680000	-0.627797
7	105280001	105300000	7	106080001	106100000	-0.803588
7	105260001	105280000	7	106100001	106120000	-0.790121
7	104620001	104640000	7	104720001	104740000	-0.67193
7	104600001	104620000	7	104720001	104740000	-0.663521
7	97640001	97660000	7	97780001	97800000	-0.699656
7	95520001	95540000	7	97460001	97480000	-0.709061
7	920001	940000	7	1100001	1120000	-0.616398
7	92860001	92880000	7	94060001	94080000	-0.605695
7	86540001	86560000	7	87020001	87040000	0.836977
7	83620001	83640000	7	83800001	83820000	0.624798
7	83600001	83620000	7	84640001	84660000	0.655939
7	83600001	83620000	7	83800001	83820000	0.601234
7	83580001	83600000	7	84640001	84660000	0.649197
7	79420001	79440000	7	79640001	79660000	0.845078
7	78900001	78920000	7	79680001	79700000	0.85326
7	78900001	78920000	7	79660001	79680000	0.826108
7	78900001	78920000	7	79640001	79660000	0.800306
7	70300001	70320000	7	71200001	71220000	-0.670758
7	69660001	69680000	7	70280001	70300000	-0.695988
7	55340001	55360000	7	55660001	55680000	-0.718442
7	55340001	55360000	7	55480001	55500000	-0.612348
7	55340001	55360000	7	55460001	55480000	-0.744656
7	55320001	55340000	7	55660001	55680000	-0.868871
7	5280001	5300000	7	5500001	5520000	-0.666245
7	48020001	48040000	7	48140001	48160000	-0.671253
7	48020001	48040000	7	48120001	48140000	-0.693981
7	48000001	48020000	7	48140001	48160000	-0.688753
7	47960001	47980000	7	48180001	48200000	-0.687518
7	47860001	47880000	7	48720001	48740000	0.669892
7	45180001	45200000	7	45300001	45320000	-0.773817
7	45000001	45020000	7	45160001	45180000	-0.871801
7	45000001	45020000	7	45140001	45160000	-0.839578
7	44980001	45000000	7	45160001	45180000	-0.843746
7	44880001	44900000	7	45160001	45180000	-0.738603
7	44640001	44660000	7	44840001	44860000	-0.809949
7	44640001	44660000	7	44800001	44820000	-0.812791
7	44640001	44660000	7	44780001	44800000	-0.81588
7	44620001	44640000	7	45160001	45180000	-0.77442
7	44620001	44640000	7	45140001	45160000	-0.794767
7	44620001	44640000	7	44960001	44980000	-0.740723
7	44620001	44640000	7	44940001	44960000	-0.732672
7	44620001	44640000	7	44900001	44920000	-0.761027
7	44620001	44640000	7	44880001	44900000	-0.767255
7	44620001	44640000	7	44860001	44880000	-0.770695
7	44620001	44640000	7	44800001	44820000	-0.81775
7	44620001	44640000	7	44780001	44800000	-0.819391
7	44620001	44640000	7	44700001	44720000	-0.73042
7	44600001	44620000	7	45160001	45180000	-0.716509
7	43740001	43760000	7	43860001	43880000	-0.64942
7	42400001	42420000	7	42620001	42640000	-0.662266
7	39900001	39920000	7	40180001	40200000	-0.754954
7	38440001	38460000	7	38700001	38720000	-0.72384
7	38440001	38460000	7	38680001	38700000	-0.735997
7	38420001	38440000	7	38700001	38720000	-0.80652
7	38420001	38440000	7	38680001	38700000	-0.809289
7	38280001	38300000	7	38380001	38400000	-0.604886
7	38260001	38280000	7	38400001	38420000	-0.639133
7	38260001	38280000	7	38380001	38400000	-0.629562
7	38220001	38240000	7	38380001	38400000	-0.637644
7	38180001	38200000	7	38400001	38420000	-0.794481
7	38140001	38160000	7	38680001	38700000	-0.676517
7	38140001	38160000	7	38400001	38420000	-0.789432
7	38140001	38160000	7	38380001	38400000	-0.774264
7	38140001	38160000	7	38260001	38280000	-0.910191
7	38120001	38140000	7	38400001	38420000	-0.855923
7	37400001	37420000	7	37480001	37500000	-0.926193
7	360001	380000	7	900001	920000	0.685347
7	360001	380000	7	880001	900000	0.668707
7	37260001	37280000	7	37540001	37560000	-0.737956
7	37260001	37280000	7	37520001	37540000	-0.80687
7	35740001	35760000	7	35840001	35860000	-0.668744
7	35720001	35740000	7	35840001	35860000	-0.651304
7	340001	360000	7	900001	920000	0.670257
7	3080001	3100000	7	3180001	3200000	-0.702436
7	3080001	3100000	7	3160001	3180000	-0.706355
7	30320001	30340000	7	30380001	30400000	-0.703864
7	30300001	30320000	7	30460001	30480000	-0.710355
7	28340001	28360000	7	28660001	28680000	0.605463
7	27700001	27720000	7	27780001	27800000	-0.66924
7	27680001	27700000	7	27780001	27800000	-0.653059
7	27220001	27240000	7	28200001	28220000	0.610633
7	26720001	26740000	7	28120001	28140000	0.662868
7	26240001	26260000	7	26400001	26420000	-0.616966
7	26240001	26260000	7	26380001	26400000	-0.616511
7	25420001	25440000	7	25600001	25620000	0.680489
7	25300001	25320000	7	25420001	25440000	0.770955
7	25280001	25300000	7	25600001	25620000	0.692607
7	25280001	25300000	7	25420001	25440000	0.738108
7	25000001	25020000	7	25100001	25120000	-0.607197
7	24940001	24960000	7	25020001	25040000	-0.693229
7	24920001	24940000	7	25000001	25020000	-0.793408
7	24860001	24880000	7	25020001	25040000	-0.786456
7	24860001	24880000	7	25000001	25020000	-0.782092
7	24860001	24880000	7	24940001	24960000	-0.73516
7	24840001	24860000	7	25020001	25040000	-0.751083
7	24600001	24620000	7	25220001	25240000	-0.645116
7	23120001	23140000	7	23220001	23240000	-0.644811
7	22880001	22900000	7	23080001	23100000	-0.803663
7	22880001	22900000	7	23060001	23080000	-0.809283
7	22880001	22900000	7	23040001	23060000	-0.811017
7	22860001	22880000	7	23140001	23160000	-0.6555
7	22860001	22880000	7	23080001	23100000	-0.784881
7	22840001	22860000	7	23080001	23100000	-0.778252
7	22780001	22800000	7	23080001	23100000	-0.715068
7	22760001	22780000	7	23080001	23100000	-0.695277
7	22620001	22640000	7	22760001	22780000	-0.665646
7	22600001	22620000	7	22760001	22780000	-0.642724
7	22600001	22620000	7	22740001	22760000	-0.619054
7	21380001	21400000	7	21460001	21480000	-0.910521
7	21320001	21340000	7	21520001	21540000	-0.835111
7	21320001	21340000	7	21500001	21520000	-0.870392
7	21300001	21320000	7	21560001	21580000	-0.721605
7	21300001	21320000	7	21540001	21560000	-0.776781
7	21300001	21320000	7	21460001	21480000	-0.945249
7	21300001	21320000	7	21440001	21460000	-0.954798
7	21280001	21300000	7	21540001	21560000	-0.773836
7	21280001	21300000	7	21520001	21540000	-0.791683
7	20200001	20220000	7	20640001	20660000	-0.602973
7	20160001	20180000	7	20580001	20600000	-0.616711
6	180001	200000	6	400001	420000	-0.603613
6	180001	200000	6	380001	400000	-0.712653
6	18160001	18180000	6	18260001	18280000	-0.826059
6	18160001	18180000	6	18240001	18260000	-0.769393
6	167580001	167600000	6	167700001	167720000	0.69122
6	167440001	167460000	6	167520001	167540000	-0.720566
6	16640001	16660000	6	16740001	16760000	-0.795154
6	16640001	16660000	6	16720001	16740000	-0.804354
6	16620001	16640000	6	16740001	16760000	-0.796456
6	16500001	16520000	6	16760001	16780000	-0.789036
6	16500001	16520000	6	16740001	16760000	-0.807699
6	16420001	16440000	6	16480001	16500000	-0.632927
6	16400001	16420000	6	16480001	16500000	-0.660728
6	16320001	16340000	6	16760001	16780000	-0.857959
6	16320001	16340000	6	16740001	16760000	-0.861211
6	16320001	16340000	6	16480001	16500000	-0.79376
6	161520001	161540000	6	161780001	161800000	-0.66899
6	161500001	161520000	6	161780001	161800000	-0.66949
6	161140001	161160000	6	161780001	161800000	-0.625982
6	1600001	1620000	6	2740001	2760000	-0.656273
6	160560001	160580000	6	160940001	160960000	-0.69123
6	160540001	160560000	6	160960001	160980000	-0.779206
6	160540001	160560000	6	160940001	160960000	-0.741597
6	160540001	160560000	6	160900001	160920000	-0.698857
6	160280001	160300000	6	160860001	160880000	-0.650404
6	160260001	160280000	6	160880001	160900000	-0.628505
6	160260001	160280000	6	160860001	160880000	-0.766542
6	160160001	160180000	6	160880001	160900000	-0.606076
6	160100001	160120000	6	160940001	160960000	-0.640642
6	160080001	160100000	6	160940001	160960000	-0.805726
6	159440001	159460000	6	159520001	159540000	-0.668422
6	159420001	159440000	6	159520001	159540000	-0.671542
6	159200001	159220000	6	159380001	159400000	-0.746178
6	159120001	159140000	6	159540001	159560000	-0.622886
6	159120001	159140000	6	159380001	159400000	-0.602021
6	158620001	158640000	6	159560001	159580000	-0.698752
6	158620001	158640000	6	159540001	159560000	-0.701561
6	158600001	158620000	6	159540001	159560000	-0.758882
6	158600001	158620000	6	159520001	159540000	-0.679965
6	158180001	158200000	6	158300001	158320000	0.627016
6	158160001	158180000	6	158300001	158320000	0.639299
6	158160001	158180000	6	158280001	158300000	0.675789
6	15680001	15700000	6	16780001	16800000	-0.841215
6	156700001	156720000	6	157080001	157100000	0.681543
6	155240001	155260000	6	155580001	155600000	-0.727624
6	155240001	155260000	6	155500001	155520000	-0.678962
6	155240001	155260000	6	155480001	155500000	-0.669403
6	155000001	155020000	6	155600001	155620000	-0.723086
6	155000001	155020000	6	155460001	155480000	-0.603899
6	153320001	153340000	6	154500001	154520000	-0.752277
6	153300001	153320000	6	154560001	154580000	-0.618424
6	153180001	153200000	6	153340001	153360000	-0.719824
6	152860001	152880000	6	152960001	152980000	-0.685104
6	151900001	151920000	6	152920001	152940000	0.80518
6	151700001	151720000	6	151780001	151800000	-0.884125
6	151680001	151700000	6	151780001	151800000	-0.93583
6	151340001	151360000	6	151640001	151660000	-0.726673
6	151320001	151340000	6	151640001	151660000	-0.75153
6	151300001	151320000	6	151640001	151660000	-0.766372
6	151220001	151240000	6	151640001	151660000	-0.744853
6	151200001	151220000	6	151780001	151800000	-0.810827
6	151200001	151220000	6	151640001	151660000	-0.770663
6	150400001	150420000	6	151140001	151160000	-0.688501
6	150400001	150420000	6	151120001	151140000	-0.667038
6	150380001	150400000	6	151140001	151160000	-0.731274
6	150380001	150400000	6	151120001	151140000	-0.691021
6	149060001	149080000	6	149840001	149860000	-0.867586
6	149060001	149080000	6	149260001	149280000	-0.783216
6	148880001	148900000	6	149760001	149780000	-0.886458
6	148880001	148900000	6	149740001	149760000	-0.926609
6	148880001	148900000	6	149280001	149300000	-0.844533
6	148880001	148900000	6	149260001	149280000	-0.820966
6	147240001	147260000	6	147580001	147600000	0.645233
6	147200001	147220000	6	147600001	147620000	0.625379
6	147200001	147220000	6	147580001	147600000	0.603978
6	147180001	147200000	6	147620001	147640000	0.626844
6	147180001	147200000	6	147600001	147620000	0.612584
6	147180001	147200000	6	147580001	147600000	0.614
6	147160001	147180000	6	147600001	147620000	0.639672
6	144440001	144460000	6	144520001	144540000	-0.802961
6	144420001	144440000	6	144540001	144560000	-0.764717
6	144420001	144440000	6	144520001	144540000	-0.795549
6	142880001	142900000	6	143740001	143760000	0.611707
6	142800001	142820000	6	143740001	143760000	0.672537
6	142780001	142800000	6	144320001	144340000	0.72223
6	142780001	142800000	6	143740001	143760000	0.675715
6	142780001	142800000	6	143720001	143740000	0.67726
6	142460001	142480000	6	143760001	143780000	0.621978
6	142460001	142480000	6	143740001	143760000	0.636159
6	13900001	13920000	6	14140001	14160000	-0.654241
6	138180001	138200000	6	138280001	138300000	-0.733047
6	138100001	138120000	6	138280001	138300000	-0.676512
6	137400001	137420000	6	137640001	137660000	-0.62621
6	137300001	137320000	6	137960001	137980000	-0.609598
6	136000001	136020000	6	136220001	136240000	0.60349
6	135980001	136000000	6	136640001	136660000	0.678062
6	13340001	13360000	6	13720001	13740000	-0.667291
6	13320001	13340000	6	13760001	13780000	-0.623878
6	13320001	13340000	6	13680001	13700000	-0.754149
6	13320001	13340000	6	13600001	13620000	-0.614488
6	132980001	133000000	6	133100001	133120000	-0.680115
6	132980001	133000000	6	133080001	133100000	-0.616401
6	132840001	132860000	6	133120001	133140000	-0.791252
6	132840001	132860000	6	133100001	133120000	-0.814277
6	132840001	132860000	6	133080001	133100000	-0.817468
6	132820001	132840000	6	133120001	133140000	-0.763922
6	132820001	132840000	6	133100001	133120000	-0.796053
6	132600001	132620000	6	132800001	132820000	-0.619741
6	131520001	131540000	6	131600001	131620000	0.80701
6	131200001	131220000	6	131440001	131460000	0.894472
6	131200001	131220000	6	131420001	131440000	0.913733
6	127980001	128000000	6	129060001	129080000	0.678089
6	124120001	124140000	6	125440001	125460000	-0.677309
6	122680001	122700000	6	122820001	122840000	0.641498
6	121640001	121660000	6	122700001	122720000	0.799625
6	120580001	120600000	6	121040001	121060000	-0.682682
6	118600001	118620000	6	118900001	118920000	-0.702815
6	118300001	118320000	6	118920001	118940000	-0.700009
6	118280001	118300000	6	118860001	118880000	-0.629759
6	117660001	117680000	6	117880001	117900000	-0.724507
6	11700001	11720000	6	12000001	12020000	0.625071
6	11680001	11700000	6	12020001	12040000	0.601465
6	116440001	116460000	6	116960001	116980000	-0.769178
6	116420001	116440000	6	117020001	117040000	-0.709733
6	116420001	116440000	6	116980001	117000000	-0.777676
6	113620001	113640000	6	114180001	114200000	-0.779698
6	112500001	112520000	6	112620001	112640000	-0.729269
6	11200001	11220000	6	11380001	11400000	-0.719911
6	11180001	11200000	6	11400001	11420000	-0.708734
6	11180001	11200000	6	11360001	11380000	-0.73794
6	110840001	110860000	6	111520001	111540000	-0.772936
6	110840001	110860000	6	111320001	111340000	-0.698425
6	110840001	110860000	6	111300001	111320000	-0.637779
6	110840001	110860000	6	111000001	111020000	-0.629273
6	108880001	108900000	6	109780001	109800000	-0.650212
6	108860001	108880000	6	109700001	109720000	-0.746725
6	108860001	108880000	6	109680001	109700000	-0.64455
6	108860001	108880000	6	109280001	109300000	-0.666725
6	108860001	108880000	6	109240001	109260000	-0.733276
6	108860001	108880000	6	109220001	109240000	-0.631959
6	108860001	108880000	6	109200001	109220000	-0.63055
6	106900001	106920000	6	107320001	107340000	-0.615052
6	106180001	106200000	6	106520001	106540000	-0.720827
6	106160001	106180000	6	106520001	106540000	-0.794004
6	105920001	105940000	6	106660001	106680000	-0.686769
6	105920001	105940000	6	106540001	106560000	-0.788961
6	105900001	105920000	6	106700001	106720000	-0.641202
6	105900001	105920000	6	106680001	106700000	-0.651637
6	105900001	105920000	6	106540001	106560000	-0.798161
6	105880001	105900000	6	106740001	106760000	-0.617762
6	105880001	105900000	6	106720001	106740000	-0.640386
6	105880001	105900000	6	106700001	106720000	-0.670623
6	105860001	105880000	6	106740001	106760000	-0.65832
6	105520001	105540000	6	105860001	105880000	-0.681033
6	100440001	100460000	6	101100001	101120000	-0.674066
6	99260001	99280000	6	100040001	100060000	-0.613896
6	90420001	90440000	6	91220001	91240000	0.641825
6	90400001	90420000	6	91240001	91260000	0.624575
6	87840001	87860000	6	88100001	88120000	-0.623371
6	87840001	87860000	6	87940001	87960000	-0.618148
6	84580001	84600000	6	84920001	84940000	-0.707947
6	84560001	84580000	6	84920001	84940000	-0.664988
6	83940001	83960000	6	84220001	84240000	-0.792451
6	83920001	83940000	6	84220001	84240000	-0.739528
6	81720001	81740000	6	82040001	82060000	0.663982
6	80480001	80500000	6	80800001	80820000	0.826592
6	78940001	78960000	6	79040001	79060000	0.936725
6	78500001	78520000	6	78680001	78700000	0.709059
6	74140001	74160000	6	74340001	74360000	-0.667347
6	73140001	73160000	6	73280001	73300000	0.687556
6	7300001	7320000	6	7380001	7400000	-0.675994
6	7280001	7300000	6	7400001	7420000	-0.691724
6	7280001	7300000	6	7380001	7400000	-0.6963
6	70500001	70520000	6	71360001	71380000	0.788443
6	65880001	65900000	6	66020001	66040000	0.601337
6	65860001	65880000	6	66000001	66020000	0.633216
6	56420001	56440000	6	56640001	56660000	0.791101
6	52720001	52740000	6	52920001	52940000	-0.680296
6	52720001	52740000	6	52900001	52920000	-0.748385
6	48060001	48080000	6	48740001	48760000	-0.629567
6	47280001	47300000	6	48060001	48080000	-0.677934
6	45400001	45420000	6	45660001	45680000	-0.638953
6	44600001	44620000	6	45860001	45880000	-0.667501
6	44440001	44460000	6	45880001	45900000	-0.615961
6	44420001	44440000	6	45900001	45920000	-0.612672
6	43220001	43240000	6	43360001	43380000	-0.690193
6	41740001	41760000	6	42000001	42020000	-0.615115
6	37000001	37020000	6	37140001	37160000	-0.611149
6	36980001	37000000	6	37160001	37180000	-0.606618
6	36580001	36600000	6	37160001	37180000	-0.725398
6	36580001	36600000	6	36720001	36740000	-0.663416
6	36000001	36020000	6	36320001	36340000	-0.612929
6	35260001	35280000	6	35680001	35700000	0.640909
6	35240001	35260000	6	35700001	35720000	0.665282
6	34480001	34500000	6	35100001	35120000	-0.825684
6	34440001	34460000	6	35140001	35160000	-0.805617
6	34440001	34460000	6	35120001	35140000	-0.849457
6	34420001	34440000	6	35180001	35200000	-0.757654
6	34420001	34440000	6	35160001	35180000	-0.771074
6	34420001	34440000	6	35120001	35140000	-0.835248
6	34420001	34440000	6	35100001	35120000	-0.831999
6	34420001	34440000	6	35080001	35100000	-0.780537
6	34400001	34420000	6	35120001	35140000	-0.783074
6	34220001	34240000	6	35100001	35120000	-0.621598
6	34140001	34160000	6	35100001	35120000	-0.687755
6	34120001	34140000	6	35100001	35120000	-0.65248
6	34100001	34120000	6	35100001	35120000	-0.669742
6	33780001	33800000	6	35160001	35180000	-0.732274
6	33440001	33460000	6	33960001	33980000	0.620225
6	32860001	32880000	6	33040001	33060000	-0.619478
6	32800001	32820000	6	32940001	32960000	-0.605805
6	32540001	32560000	6	32640001	32660000	-0.656928
6	32520001	32540000	6	32640001	32660000	-0.726729
6	32460001	32480000	6	32540001	32560000	-0.707135
6	32440001	32460000	6	32520001	32540000	-0.689668
6	30180001	30200000	6	30360001	30380000	-0.767411
6	2760001	2780000	6	4140001	4160000	0.715237
6	2740001	2760000	6	4140001	4160000	0.664155
6	2740001	2760000	6	4120001	4140000	0.651525
6	26180001	26200000	6	27780001	27800000	-0.696791
6	26180001	26200000	6	27100001	27120000	-0.80687
6	26160001	26180000	6	27100001	27120000	-0.79948
6	26040001	26060000	6	27100001	27120000	-0.938721
6	26020001	26040000	6	27820001	27840000	-0.783814
6	26020001	26040000	6	27780001	27800000	-0.714719
6	26020001	26040000	6	27100001	27120000	-0.953512
5	17200001	17220000	5	18300001	18320000	-0.660081
5	171320001	171340000	5	171460001	171480000	-0.61374
5	168120001	168140000	5	168980001	169000000	0.625223
5	168100001	168120000	5	168980001	169000000	0.680618
5	168080001	168100000	5	168980001	169000000	0.60833
5	168040001	168060000	5	169000001	169020000	0.622207
5	167900001	167920000	5	169000001	169020000	0.679974
5	167700001	167720000	5	168020001	168040000	0.889562
5	167700001	167720000	5	167860001	167880000	0.865225
5	167700001	167720000	5	167840001	167860000	0.848049
5	167700001	167720000	5	167820001	167840000	0.863153
5	167680001	167700000	5	168020001	168040000	0.875894
5	167680001	167700000	5	167840001	167860000	0.868305
5	16560001	16580000	5	16660001	16680000	0.688605
5	16480001	16500000	5	16660001	16680000	0.698098
5	16460001	16480000	5	16660001	16680000	0.694331
5	16460001	16480000	5	16640001	16660000	0.692587
5	16460001	16480000	5	16620001	16640000	0.691112
5	158760001	158780000	5	158840001	158860000	-0.717445
5	158740001	158760000	5	158840001	158860000	-0.619243
5	157600001	157620000	5	158520001	158540000	0.60272
5	157500001	157520000	5	158540001	158560000	0.607332
5	156920001	156940000	5	157140001	157160000	-0.722286
5	156880001	156900000	5	157140001	157160000	-0.734034
5	156860001	156880000	5	157160001	157180000	-0.735909
5	156860001	156880000	5	157140001	157160000	-0.705981
5	156840001	156860000	5	157160001	157180000	-0.683416
5	156820001	156840000	5	157140001	157160000	-0.61081
5	156740001	156760000	5	157160001	157180000	-0.600759
5	155380001	155400000	5	155480001	155500000	0.607796
5	155360001	155380000	5	155480001	155500000	0.670999
5	153560001	153580000	5	153820001	153840000	-0.674029
5	153420001	153440000	5	154320001	154340000	-0.714602
5	153400001	153420000	5	154320001	154340000	-0.613218
5	153400001	153420000	5	154240001	154260000	-0.646795
5	153340001	153360000	5	153980001	154000000	-0.661866
5	151900001	151920000	5	153340001	153360000	-0.600232
5	148220001	148240000	5	148320001	148340000	-0.678783
5	148120001	148140000	5	148380001	148400000	-0.668832
5	148120001	148140000	5	148340001	148360000	-0.694307
5	148100001	148120000	5	148400001	148420000	-0.651777
5	148100001	148120000	5	148380001	148400000	-0.669899
5	148100001	148120000	5	148360001	148380000	-0.694576
5	147820001	147840000	5	148400001	148420000	-0.636259
5	146040001	146060000	5	146320001	146340000	-0.605364
5	146040001	146060000	5	146220001	146240000	-0.623408
5	145920001	145940000	5	146560001	146580000	-0.767761
5	145900001	145920000	5	146560001	146580000	-0.743418
5	143580001	143600000	5	145200001	145220000	-0.725395
5	141720001	141740000	5	143560001	143580000	-0.689927
5	141040001	141060000	5	141940001	141960000	0.679703
5	134080001	134100000	5	134220001	134240000	-0.668128
5	133620001	133640000	5	134200001	134220000	-0.608018
5	133540001	133560000	5	134200001	134220000	-0.676427
5	133520001	133540000	5	134200001	134220000	-0.757125
5	133500001	133520000	5	134220001	134240000	-0.729333
5	133500001	133520000	5	134200001	134220000	-0.734074
5	131720001	131740000	5	132060001	132080000	-0.676432
5	131720001	131740000	5	132040001	132060000	-0.717266
5	131700001	131720000	5	132040001	132060000	-0.696641
5	127080001	127100000	5	127540001	127560000	-0.690435
5	127080001	127100000	5	127520001	127540000	-0.813925
5	127060001	127080000	5	127520001	127540000	-0.898694
5	126160001	126180000	5	126540001	126560000	0.762648
5	126160001	126180000	5	126380001	126400000	0.631482
5	126160001	126180000	5	126360001	126380000	0.648483
5	126160001	126180000	5	126340001	126360000	0.642588
5	115460001	115480000	5	116280001	116300000	-0.700033
5	115460001	115480000	5	116260001	116280000	-0.69811
5	114440001	114460000	5	114560001	114580000	-0.676893
5	114420001	114440000	5	114580001	114600000	-0.752275
5	110500001	110520000	5	110600001	110620000	0.689567
5	110480001	110500000	5	110600001	110620000	0.675642
5	110420001	110440000	5	110840001	110860000	0.64651
5	109180001	109200000	5	109380001	109400000	0.864589
5	109160001	109180000	5	109380001	109400000	0.860797
5	109040001	109060000	5	109380001	109400000	0.830369
5	109020001	109040000	5	109380001	109400000	0.841729
5	109020001	109040000	5	109160001	109180000	0.678597
5	108800001	108820000	5	109940001	109960000	0.937383
5	101860001	101880000	5	102460001	102480000	-0.641193
5	95200001	95220000	5	95660001	95680000	-0.684758
5	95180001	95200000	5	96500001	96520000	0.682414
5	95180001	95200000	5	95660001	95680000	-0.681966
5	95100001	95120000	5	95660001	95680000	-0.828211
5	95060001	95080000	5	95660001	95680000	-0.799929
5	94980001	95000000	5	96500001	96520000	0.623611
5	94960001	94980000	5	96500001	96520000	0.691518
5	93860001	93880000	5	94040001	94060000	-0.734519
5	93860001	93880000	5	94020001	94040000	-0.776008
5	93840001	93860000	5	94060001	94080000	-0.765476
5	93840001	93860000	5	94040001	94060000	-0.776267
5	93840001	93860000	5	94020001	94040000	-0.813153
5	92920001	92940000	5	94060001	94080000	-0.834789
5	92920001	92940000	5	93120001	93140000	-0.835116
5	92900001	92920000	5	94060001	94080000	-0.780672
5	92900001	92920000	5	93120001	93140000	-0.776201
5	90400001	90420000	5	90700001	90720000	-0.604889
5	90380001	90400000	5	90720001	90740000	-0.644008
5	90380001	90400000	5	90700001	90720000	-0.615387
5	89700001	89720000	5	90680001	90700000	0.796792
5	89680001	89700000	5	90680001	90700000	0.802158
5	75900001	75920000	5	76060001	76080000	-0.798514
5	75880001	75900000	5	76080001	76100000	-0.821872
5	75880001	75900000	5	76060001	76080000	-0.830024
5	75700001	75720000	5	75840001	75860000	-0.627386
5	75700001	75720000	5	75820001	75840000	-0.652993
5	75680001	75700000	5	75820001	75840000	-0.652357
5	74520001	74540000	5	74980001	75000000	-0.857132
5	74340001	74360000	5	74540001	74560000	0.66791
5	74340001	74360000	5	74520001	74540000	0.674921
5	74320001	74340000	5	74540001	74560000	0.685117
5	74320001	74340000	5	74520001	74540000	0.682417
5	74220001	74240000	5	74560001	74580000	0.644922
5	74220001	74240000	5	74540001	74560000	0.678703
5	74200001	74220000	5	74560001	74580000	0.647822
5	74060001	74080000	5	74560001	74580000	0.718231
5	74060001	74080000	5	74540001	74560000	0.73018
5	74040001	74060000	5	74540001	74560000	0.709651
5	73980001	74000000	5	74540001	74560000	0.610881
5	73200001	73220000	5	74200001	74220000	-0.63016
5	73180001	73200000	5	74200001	74220000	-0.680082
5	73180001	73200000	5	74180001	74200000	-0.736773
5	72880001	72900000	5	73080001	73100000	-0.679018
5	72880001	72900000	5	73060001	73080000	-0.664589
5	72140001	72160000	5	72860001	72880000	0.625273
5	71420001	71440000	5	71600001	71620000	-0.769039
5	71420001	71440000	5	71580001	71600000	-0.770368
5	71420001	71440000	5	71560001	71580000	-0.738823
5	70860001	70880000	5	71600001	71620000	-0.673982
5	67580001	67600000	5	67740001	67760000	-0.692725
5	6620001	6640000	5	6720001	6740000	-0.625642
5	6280001	6300000	5	6740001	6760000	0.689018
5	6280001	6300000	5	6560001	6580000	0.706488
5	62620001	62640000	5	62800001	62820000	-0.658844
5	59340001	59360000	5	59500001	59520000	-0.621215
5	56840001	56860000	5	57320001	57340000	0.618413
5	54560001	54580000	5	56160001	56180000	0.666446
5	54540001	54560000	5	56180001	56200000	0.6754
5	52740001	52760000	5	53020001	53040000	0.606538
5	51140001	51160000	5	51520001	51540000	0.750096
5	43940001	43960000	5	44120001	44140000	-0.871789
5	40140001	40160000	5	40680001	40700000	-0.749065
5	40040001	40060000	5	40700001	40720000	-0.783854
5	40020001	40040000	5	40700001	40720000	-0.706677
5	39940001	39960000	5	40720001	40740000	-0.607962
5	39940001	39960000	5	40500001	40520000	-0.757232
5	38440001	38460000	5	39540001	39560000	0.604142
5	38420001	38440000	5	39540001	39560000	0.623887
5	38420001	38440000	5	38800001	38820000	-0.712637
5	36860001	36880000	5	37380001	37400000	0.683262
5	35080001	35100000	5	35940001	35960000	0.697203
5	35080001	35100000	5	35920001	35940000	0.72357
5	32480001	32500000	5	32580001	32600000	-0.653526
5	32460001	32480000	5	32580001	32600000	-0.671054
5	32420001	32440000	5	32600001	32620000	-0.635361
5	32380001	32400000	5	32600001	32620000	-0.608719
5	32380001	32400000	5	32580001	32600000	-0.613194
5	32240001	32260000	5	32320001	32340000	-0.703469
5	32220001	32240000	5	32320001	32340000	-0.643574
5	24300001	24320000	5	24660001	24680000	0.77607
4	17940001	17960000	4	18100001	18120000	-0.722413
4	178200001	178220000	4	178360001	178380000	-0.615246
4	17720001	17740000	4	18580001	18600000	-0.631673
4	177120001	177140000	4	177240001	177260000	-0.618125
4	177120001	177140000	4	177220001	177240000	-0.802352
4	177100001	177120000	4	177220001	177240000	-0.711176
4	17540001	17560000	4	17640001	17660000	-0.67165
4	17460001	17480000	4	18600001	18620000	-0.656492
4	174440001	174460000	4	175120001	175140000	-0.60108
4	174420001	174440000	4	175200001	175220000	-0.629776
4	17360001	17380000	4	18580001	18600000	-0.646993
4	169920001	169940000	4	170940001	170960000	0.662049
4	169920001	169940000	4	170540001	170560000	-0.636693
4	169420001	169440000	4	169820001	169840000	-0.731432
4	169400001	169420000	4	169920001	169940000	-0.690691
4	159780001	159800000	4	160100001	160120000	-0.67372
4	159780001	159800000	4	160080001	160100000	-0.700156
4	159760001	159780000	4	160100001	160120000	-0.664514
4	159760001	159780000	4	160080001	160100000	-0.68849
4	158080001	158100000	4	158520001	158540000	0.625868
4	151220001	151240000	4	151780001	151800000	-0.680802
4	151220001	151240000	4	151760001	151780000	-0.688691
4	151200001	151220000	4	151780001	151800000	-0.692024
4	151200001	151220000	4	151760001	151780000	-0.708609
4	150900001	150920000	4	151780001	151800000	-0.643158
4	148920001	148940000	4	149680001	149700000	0.774217
4	148620001	148640000	4	148780001	148800000	-0.614731
4	148620001	148640000	4	148760001	148780000	-0.600509
4	148520001	148540000	4	148780001	148800000	-0.612885
4	146900001	146920000	4	147040001	147060000	0.636233
4	146000001	146020000	4	146540001	146560000	-0.605062
4	146000001	146020000	4	146080001	146100000	-0.76029
4	141080001	141100000	4	141160001	141180000	0.643918
4	140000001	140020000	4	140080001	140100000	-0.726198
4	1360001	1380000	4	1640001	1660000	0.888165
4	1360001	1380000	4	1620001	1640000	0.808115
4	129780001	129800000	4	130000001	130020000	-0.625589
4	129720001	129740000	4	130000001	130020000	-0.60406
4	128800001	128820000	4	128980001	129000000	-0.653996
4	128800001	128820000	4	128880001	128900000	-0.618134
4	128780001	128800000	4	128880001	128900000	-0.661132
4	123660001	123680000	4	123840001	123860000	-0.718221
4	123520001	123540000	4	123840001	123860000	-0.698991
4	123500001	123520000	4	123840001	123860000	-0.662013
4	123240001	123260000	4	123840001	123860000	-0.810302
4	123220001	123240000	4	123840001	123860000	-0.809398
4	123180001	123200000	4	123840001	123860000	-0.898727
4	123120001	123140000	4	123840001	123860000	-0.844946
4	122840001	122860000	4	123840001	123860000	-0.647035
4	122820001	122840000	4	123840001	123860000	-0.684615
4	122800001	122820000	4	123840001	123860000	-0.806092
4	122780001	122800000	4	123840001	123860000	-0.806288
4	122740001	122760000	4	123840001	123860000	-0.785027
4	122720001	122740000	4	123840001	123860000	-0.674017
4	122380001	122400000	4	122640001	122660000	-0.658342
4	1140001	1160000	4	1320001	1340000	-0.764523
4	1140001	1160000	4	1280001	1300000	-0.88122
4	114680001	114700000	4	114820001	114840000	0.78534
4	114680001	114700000	4	114800001	114820000	0.79717
4	114460001	114480000	4	114660001	114680000	-0.664266
4	114320001	114340000	4	115300001	115320000	0.884669
4	114320001	114340000	4	115280001	115300000	0.868172
4	114320001	114340000	4	115000001	115020000	-0.705864
4	114320001	114340000	4	114980001	115000000	-0.709257
4	114300001	114320000	4	115300001	115320000	0.874727
4	114300001	114320000	4	114980001	115000000	-0.712848
4	1120001	1140000	4	1320001	1340000	-0.641146
4	111140001	111160000	4	111420001	111440000	-0.718103
4	111120001	111140000	4	111420001	111440000	-0.743014
4	110960001	110980000	4	111140001	111160000	-0.62049
4	110960001	110980000	4	111120001	111140000	-0.615832
4	110760001	110780000	4	111440001	111460000	-0.718866
4	110760001	110780000	4	111420001	111440000	-0.776914
4	110340001	110360000	4	111440001	111460000	-0.675896
4	110340001	110360000	4	111120001	111140000	-0.714506
4	110320001	110340000	4	111440001	111460000	-0.66234
4	110320001	110340000	4	111420001	111440000	-0.752211
4	100001	120000	4	440001	460000	0.67641
4	103440001	103460000	4	103520001	103540000	0.7929
4	103420001	103440000	4	103520001	103540000	0.825799
4	103380001	103400000	4	103520001	103540000	0.859748
4	103360001	103380000	4	103540001	103560000	0.685342
4	103360001	103380000	4	103520001	103540000	0.823195
4	102100001	102120000	4	102520001	102540000	-0.62958
4	100720001	100740000	4	100860001	100880000	0.661845
4	95540001	95560000	4	96020001	96040000	0.654753
4	90380001	90400000	4	90800001	90820000	0.633055
4	90360001	90380000	4	90820001	90840000	0.714387
4	90360001	90380000	4	90800001	90820000	0.625801
4	90340001	90360000	4	90820001	90840000	0.672347
4	88960001	88980000	4	89420001	89440000	-0.659412
4	88940001	88960000	4	89420001	89440000	-0.662428
4	88940001	88960000	4	89120001	89140000	-0.604504
4	84420001	84440000	4	84560001	84580000	-0.631425
4	84400001	84420000	4	84560001	84580000	-0.8026
4	81020001	81040000	4	81100001	81120000	0.605622
4	78320001	78340000	4	78500001	78520000	-0.795914
4	78300001	78320000	4	78520001	78540000	-0.756768
4	71900001	71920000	4	72560001	72580000	-0.757151
4	7180001	7200000	4	7780001	7800000	-0.836006
4	71840001	71860000	4	72560001	72580000	-0.815041
4	7160001	7180000	4	7700001	7720000	-0.702406
4	70540001	70560000	4	70740001	70760000	0.69382
4	70540001	70560000	4	70720001	70740000	0.759227
4	56280001	56300000	4	56400001	56420000	-0.815774
4	56260001	56280000	4	56400001	56420000	-0.70941
4	56240001	56260000	4	56400001	56420000	-0.685233
4	56220001	56240000	4	56400001	56420000	-0.66017
4	56200001	56220000	4	56400001	56420000	-0.618107
4	55540001	55560000	4	55820001	55840000	0.862539
4	55540001	55560000	4	55800001	55820000	0.883389
4	55180001	55200000	4	56160001	56180000	0.918741
4	55180001	55200000	4	55820001	55840000	0.901633
4	54840001	54860000	4	54940001	54960000	-0.879541
4	54220001	54240000	4	54900001	54920000	-0.657068
4	53300001	53320000	4	53820001	53840000	-0.753623
4	53240001	53260000	4	53840001	53860000	-0.749288
4	53220001	53240000	4	53840001	53860000	-0.668794
4	52700001	52720000	4	52880001	52900000	-0.60803
4	46840001	46860000	4	47400001	47420000	-0.725503
4	41280001	41300000	4	41660001	41680000	-0.636286
4	39560001	39580000	4	40560001	40580000	0.620914
4	36240001	36260000	4	36380001	36400000	-0.676633
4	36240001	36260000	4	36320001	36340000	-0.621898
4	36200001	36220000	4	36380001	36400000	-0.601228
4	26320001	26340000	4	26400001	26420000	-0.843865
4	26040001	26060000	4	26400001	26420000	-0.673726
4	23140001	23160000	4	24420001	24440000	0.696262
4	22880001	22900000	4	24420001	24440000	0.652225
3	19980001	20000000	3	20220001	20240000	-0.798128
3	19980001	20000000	3	20200001	20220000	-0.864131
3	195980001	196000000	3	196220001	196240000	-0.883281
3	195960001	195980000	3	196260001	196280000	-0.88437
3	195800001	195820000	3	195920001	195940000	-0.779317
3	195780001	195800000	3	195920001	195940000	-0.722733
3	191380001	191400000	3	191680001	191700000	-0.672324
3	191380001	191400000	3	191640001	191660000	-0.751156
3	189940001	189960000	3	190040001	190060000	0.802715
3	188760001	188780000	3	188860001	188880000	-0.772409
3	188760001	188780000	3	188840001	188860000	-0.685351
3	188740001	188760000	3	188860001	188880000	-0.642575
3	187700001	187720000	3	187860001	187880000	-0.696887
3	187680001	187700000	3	187860001	187880000	-0.715268
3	187480001	187500000	3	188020001	188040000	-0.621653
3	187480001	187500000	3	187680001	187700000	-0.72435
3	187460001	187480000	3	188460001	188480000	-0.690354
3	187460001	187480000	3	188040001	188060000	-0.606947
3	187460001	187480000	3	188020001	188040000	-0.610994
3	187460001	187480000	3	187720001	187740000	-0.633125
3	187460001	187480000	3	187700001	187720000	-0.672193
3	187460001	187480000	3	187680001	187700000	-0.658291
3	187440001	187460000	3	188760001	188780000	-0.61354
3	187440001	187460000	3	188460001	188480000	-0.693189
3	18700001	18720000	3	18780001	18800000	0.608206
3	18680001	18700000	3	18780001	18800000	0.602871
3	185280001	185300000	3	185520001	185540000	-0.80287
3	185060001	185080000	3	185280001	185300000	-0.792234
3	184080001	184100000	3	184500001	184520000	0.722026
3	184080001	184100000	3	184240001	184260000	0.716314
3	184060001	184080000	3	184500001	184520000	0.735704
3	184040001	184060000	3	184500001	184520000	0.645716
3	183600001	183620000	3	184520001	184540000	0.756257
3	182420001	182440000	3	183100001	183120000	-0.606407
3	180320001	180340000	3	180620001	180640000	0.643593
3	178740001	178760000	3	178840001	178860000	0.637438
3	178720001	178740000	3	178840001	178860000	0.619862
3	178720001	178740000	3	178820001	178840000	0.606566
3	17300001	17320000	3	19040001	19060000	0.600025
3	171740001	171760000	3	172020001	172040000	-0.738025
3	169580001	169600000	3	169660001	169680000	0.773631
3	16860001	16880000	3	17260001	17280000	-0.638314
3	166420001	166440000	3	167480001	167500000	-0.617905
3	162480001	162500000	3	162640001	162660000	-0.703829
3	161000001	161020000	3	161120001	161140000	0.683586
3	160980001	161000000	3	161120001	161140000	0.602079
3	157820001	157840000	3	158360001	158380000	0.683682
3	157820001	157840000	3	158340001	158360000	0.715646
3	15660001	15680000	3	15860001	15880000	-0.631883
3	156260001	156280000	3	156520001	156540000	-0.630713
3	156260001	156280000	3	156380001	156400000	-0.705816
3	155540001	155560000	3	155620001	155640000	-0.655403
3	15460001	15480000	3	15600001	15620000	-0.759322
3	15460001	15480000	3	15580001	15600000	-0.760064
3	15440001	15460000	3	15600001	15620000	-0.789865
3	152760001	152780000	3	153280001	153300000	-0.620799
3	15260001	15280000	3	15600001	15620000	-0.785701
3	15240001	15260000	3	16280001	16300000	-0.819887
3	15240001	15260000	3	15840001	15860000	-0.865992
3	15220001	15240000	3	16280001	16300000	-0.786459
3	150300001	150320000	3	150580001	150600000	-0.746893
3	150260001	150280000	3	150460001	150480000	-0.791361
3	150260001	150280000	3	150440001	150460000	-0.6151
3	150240001	150260000	3	150840001	150860000	-0.663574
3	150240001	150260000	3	150580001	150600000	-0.76383
3	150240001	150260000	3	150560001	150580000	-0.798979
3	150240001	150260000	3	150480001	150500000	-0.788342
3	150240001	150260000	3	150460001	150480000	-0.768083
3	150100001	150120000	3	150460001	150480000	-0.605803
3	143560001	143580000	3	143680001	143700000	0.664264
3	142300001	142320000	3	143680001	143700000	0.666496
3	141840001	141860000	3	142000001	142020000	-0.704182
3	141840001	141860000	3	141980001	142000000	-0.671859
3	141040001	141060000	3	141140001	141160000	0.624587
3	141020001	141040000	3	141160001	141180000	0.623395
3	13700001	13720000	3	13900001	13920000	0.616033
3	13680001	13700000	3	13900001	13920000	0.641014
3	136580001	136600000	3	136660001	136680000	-0.614516
3	136320001	136340000	3	136440001	136460000	-0.753025
3	133140001	133160000	3	133520001	133540000	0.601529
3	132060001	132080000	3	132360001	132380000	-0.658496
3	131100001	131120000	3	131200001	131220000	-0.607206
3	130760001	130780000	3	131740001	131760000	-0.73658
3	130760001	130780000	3	131080001	131100000	-0.700811
3	130740001	130760000	3	131200001	131220000	-0.630538
3	130740001	130760000	3	131100001	131120000	-0.650642
3	130740001	130760000	3	131080001	131100000	-0.723835
3	130460001	130480000	3	131200001	131220000	-0.600456
3	129200001	129220000	3	129540001	129560000	-0.618699
3	121260001	121280000	3	122100001	122120000	-0.633614
3	121260001	121280000	3	122080001	122100000	-0.660797
3	121260001	121280000	3	122040001	122060000	-0.61948
3	121260001	121280000	3	122020001	122040000	-0.62371
3	121260001	121280000	3	122000001	122020000	-0.639871
3	118980001	119000000	3	119060001	119080000	0.635474
3	118960001	118980000	3	119060001	119080000	0.613626
3	118600001	118620000	3	118740001	118760000	0.604653
3	118580001	118600000	3	118800001	118820000	0.602996
3	116160001	116180000	3	116400001	116420000	0.842398
3	114800001	114820000	3	114880001	114900000	0.644781
3	114780001	114800000	3	114880001	114900000	0.630329
3	114760001	114780000	3	114880001	114900000	0.690221
3	113420001	113440000	3	113760001	113780000	-0.604052
3	11280001	11300000	3	11360001	11380000	-0.724342
3	11260001	11280000	3	11380001	11400000	-0.657543
3	11260001	11280000	3	11360001	11380000	-0.688362
3	112440001	112460000	3	113000001	113020000	0.64578
3	112440001	112460000	3	112980001	113000000	0.676712
3	112420001	112440000	3	112960001	112980000	0.648037
3	112340001	112360000	3	112980001	113000000	0.603271
3	110780001	110800000	3	111240001	111260000	0.787019
3	107860001	107880000	3	108180001	108200000	-0.748653
3	107840001	107860000	3	107940001	107960000	0.77503
3	107800001	107820000	3	107940001	107960000	0.708383
3	107800001	107820000	3	107920001	107940000	0.664601
3	107780001	107800000	3	107920001	107940000	0.732914
3	103880001	103900000	3	104020001	104040000	0.857233
3	101100001	101120000	3	101280001	101300000	0.774817
3	99540001	99560000	3	100300001	100320000	-0.677367
3	98560001	98580000	3	99300001	99320000	0.854958
3	98540001	98560000	3	99500001	99520000	0.831984
3	98540001	98560000	3	99480001	99500000	0.848198
3	98520001	98540000	3	99480001	99500000	0.872508
3	98520001	98540000	3	99460001	99480000	0.853851
3	7860001	7880000	3	8080001	8100000	0.618041
3	7840001	7860000	3	8140001	8160000	0.671651
3	7840001	7860000	3	8120001	8140000	0.613459
3	7820001	7840000	3	8140001	8160000	0.688604
3	71460001	71480000	3	71540001	71560000	0.688435
3	71440001	71460000	3	71540001	71560000	0.726844
3	71420001	71440000	3	71540001	71560000	0.734819
3	71420001	71440000	3	71520001	71540000	0.712736
3	70960001	70980000	3	72740001	72760000	0.739725
3	70580001	70600000	3	71720001	71740000	0.611714
3	70580001	70600000	3	71360001	71380000	0.710087
3	69200001	69220000	3	69460001	69480000	-0.611654
3	69180001	69200000	3	69720001	69740000	-0.69486
3	69180001	69200000	3	69460001	69480000	-0.636912
3	67640001	67660000	3	67820001	67840000	0.897533
3	67420001	67440000	3	68920001	68940000	0.749667
3	67420001	67440000	3	68900001	68920000	0.647068
3	63320001	63340000	3	63800001	63820000	-0.676545
3	63320001	63340000	3	63780001	63800000	-0.681014
3	61080001	61100000	3	61180001	61200000	-0.662065
3	61060001	61080000	3	61180001	61200000	-0.601239
23	19800001	19820000	23	19880001	19900000	0.711436
23	19380001	19400000	23	19900001	19920000	-0.769452
23	17760001	17780000	23	19360001	19380000	0.713787
23	17760001	17780000	23	19340001	19360000	0.668173
23	17760001	17780000	23	18900001	18920000	0.78775
23	17740001	17760000	23	19360001	19380000	0.780295
23	17740001	17760000	23	19340001	19360000	0.758181
23	17540001	17560000	23	17700001	17720000	-0.844608
3	56600001	56620000	3	56700001	56720000	0.74338
3	56600001	56620000	3	56680001	56700000	0.821833
3	56580001	56600000	3	56680001	56700000	0.855815
23	16460001	16480000	23	16700001	16720000	0.605877
23	16460001	16480000	23	16680001	16700000	0.651598
23	16440001	16460000	23	16680001	16700000	0.604105
23	16140001	16160000	23	16680001	16700000	0.7784
23	152120001	152140000	23	152920001	152940000	-0.600785
23	150500001	150520000	23	150720001	150740000	-0.678233
23	150300001	150320000	23	150860001	150880000	-0.609301
23	149940001	149960000	23	150240001	150260000	-0.623064
23	147340001	147360000	23	147420001	147440000	0.83941
23	147240001	147260000	23	147600001	147620000	0.698367
23	147000001	147020000	23	148580001	148600000	0.622319
23	146980001	147000000	23	148580001	148600000	0.803338
23	13680001	13700000	23	13760001	13780000	-0.689859
23	13660001	13680000	23	13760001	13780000	-0.708761
23	135700001	135720000	23	136000001	136020000	0.714508
23	135100001	135120000	23	135300001	135320000	0.639256
23	135080001	135100000	23	135280001	135300000	0.625011
23	132940001	132960000	23	133520001	133540000	0.624968
23	132920001	132940000	23	133520001	133540000	0.696112
3	53280001	53300000	3	53900001	53920000	-0.612671
3	53140001	53160000	3	53220001	53240000	-0.650336
23	13000001	13020000	23	14040001	14060000	-0.689176
23	12980001	13000000	23	14040001	14060000	-0.719281
23	123360001	123380000	23	123480001	123500000	0.633001
23	123340001	123360000	23	123480001	123500000	0.614176
3	51540001	51560000	3	51720001	51740000	-0.633158
23	108720001	108740000	23	108860001	108880000	-0.732845
23	108700001	108720000	23	108880001	108900000	-0.749911
23	106900001	106920000	23	107320001	107340000	0.765091
23	106900001	106920000	23	107300001	107320000	0.81445
23	106880001	106900000	23	107320001	107340000	0.75983
23	106880001	106900000	23	107300001	107320000	0.798726
23	106880001	106900000	23	107280001	107300000	0.774096
23	106240001	106260000	23	107320001	107340000	0.850873
23	106240001	106260000	23	106660001	106680000	-0.709417
23	106220001	106240000	23	106880001	106900000	-0.630402
23	106140001	106160000	23	107320001	107340000	0.623458
23	106120001	106140000	23	107300001	107320000	0.73045
23	103700001	103720000	23	104120001	104140000	0.782024
23	102780001	102800000	23	103060001	103080000	0.60079
23	102780001	102800000	23	102940001	102960000	0.883926
23	102600001	102620000	23	102700001	102720000	0.687223
23	102580001	102600000	23	102720001	102740000	0.683065
23	102580001	102600000	23	102700001	102720000	0.701124
23	102560001	102580000	23	102720001	102740000	0.767061
23	102460001	102480000	23	102740001	102760000	0.699329
23	102460001	102480000	23	102720001	102740000	0.671996
23	102460001	102480000	23	102700001	102720000	0.63662
23	102180001	102200000	23	102720001	102740000	0.605765
23	101820001	101840000	23	101900001	101920000	0.732619
23	100680001	100700000	23	101040001	101060000	0.616503
23	9300001	9320000	23	9420001	9440000	-0.649668
23	8940001	8960000	23	9420001	9440000	0.728399
23	8920001	8940000	23	9660001	9680000	-0.802358
23	8740001	8760000	23	10060001	10080000	-0.613922
23	8700001	8720000	23	10080001	10100000	-0.713173
23	8700001	8720000	23	10060001	10080000	-0.68727
23	86020001	86040000	23	86220001	86240000	-0.626169
23	85800001	85820000	23	86100001	86120000	-0.860195
3	48360001	48380000	3	49240001	49260000	-0.622509
23	82700001	82720000	23	83000001	83020000	-0.898963
23	82700001	82720000	23	82980001	83000000	-0.644436
23	80140001	80160000	23	80620001	80640000	0.74107
23	80060001	80080000	23	80360001	80380000	-0.652451
23	80040001	80060000	23	80380001	80400000	-0.603663
3	47860001	47880000	3	48180001	48200000	-0.604395
23	78520001	78540000	23	78660001	78680000	0.63959
23	78500001	78520000	23	78660001	78680000	0.63566
23	78420001	78440000	23	78500001	78520000	0.882075
23	78400001	78420000	23	78500001	78520000	0.857048
23	78380001	78400000	23	78520001	78540000	0.780475
23	78360001	78380000	23	78500001	78520000	0.834236
23	78340001	78360000	23	78520001	78540000	0.777153
23	78340001	78360000	23	78500001	78520000	0.827748
23	78340001	78360000	23	78420001	78440000	0.89452
23	78200001	78220000	23	78660001	78680000	0.631978
23	78200001	78220000	23	78640001	78660000	0.611618
23	78200001	78220000	23	78520001	78540000	0.815739
23	78200001	78220000	23	78460001	78480000	0.890985
23	78200001	78220000	23	78420001	78440000	0.869295
23	78200001	78220000	23	78400001	78420000	0.803594
23	78200001	78220000	23	78340001	78360000	0.643213
23	78180001	78200000	23	78520001	78540000	0.754201
23	78180001	78200000	23	78400001	78420000	0.824397
23	78180001	78200000	23	78320001	78340000	0.637327
23	78120001	78140000	23	78680001	78700000	0.611724
23	77800001	77820000	23	78680001	78700000	0.625813
23	77800001	77820000	23	78660001	78680000	0.627703
23	77800001	77820000	23	78500001	78520000	0.657384
23	77800001	77820000	23	78480001	78500000	0.645308
23	77800001	77820000	23	78400001	78420000	0.645021
23	77800001	77820000	23	78340001	78360000	0.638383
23	77800001	77820000	23	78320001	78340000	0.632592
23	77780001	77800000	23	78320001	78340000	0.732064
23	77600001	77620000	23	78660001	78680000	0.778251
23	77580001	77600000	23	78660001	78680000	0.738431
23	77580001	77600000	23	77780001	77800000	0.83789
23	77580001	77600000	23	77760001	77780000	0.825756
23	77560001	77580000	23	78180001	78200000	0.869717
23	77440001	77460000	23	78660001	78680000	0.82417
23	77440001	77460000	23	77640001	77660000	0.866783
23	77420001	77440000	23	78040001	78060000	0.726275
23	77400001	77420000	23	78360001	78380000	0.654272
23	77400001	77420000	23	77740001	77760000	0.932287
23	77380001	77400000	23	78700001	78720000	0.772691
23	77380001	77400000	23	78680001	78700000	0.839163
23	77380001	77400000	23	78660001	78680000	0.783798
23	77380001	77400000	23	78560001	78580000	0.844215
23	77380001	77400000	23	78500001	78520000	0.748133
23	77360001	77380000	23	78660001	78680000	0.723029
23	77360001	77380000	23	78500001	78520000	0.790417
23	77360001	77380000	23	78460001	78480000	0.66023
23	77360001	77380000	23	77760001	77780000	0.91662
23	77340001	77360000	23	78700001	78720000	0.876983
23	77340001	77360000	23	78680001	78700000	0.845638
23	77340001	77360000	23	78640001	78660000	0.698536
23	77300001	77320000	23	78680001	78700000	0.899379
3	47580001	47600000	3	48180001	48200000	-0.738513
3	47560001	47580000	3	48020001	48040000	-0.601609
23	7060001	7080000	23	7880001	7900000	-0.616928
23	7040001	7060000	23	7880001	7900000	-0.618119
3	46140001	46160000	3	46420001	46440000	-0.668861
3	46120001	46140000	3	46420001	46440000	-0.675286
3	46120001	46140000	3	46400001	46420000	-0.670517
3	45980001	46000000	3	46420001	46440000	-0.618943
3	45980001	46000000	3	46400001	46420000	-0.601318
23	47420001	47440000	23	47500001	47520000	0.644338
23	47400001	47420000	23	47500001	47520000	0.634014
23	45680001	45700000	23	46240001	46260000	0.669549
23	42500001	42520000	23	43200001	43220000	0.794951
23	41640001	41660000	23	43400001	43420000	0.614243
23	39120001	39140000	23	40120001	40140000	0.877413
23	39120001	39140000	23	39380001	39400000	0.684745
23	38600001	38620000	23	40180001	40200000	0.667871
23	3560001	3580000	23	3640001	3660000	-0.814335
3	43200001	43220000	3	43300001	43320000	0.706961
3	42820001	42840000	3	42900001	42920000	0.618869
3	42800001	42820000	3	42920001	42940000	0.743454
3	42800001	42820000	3	42900001	42920000	0.724793
23	23720001	23740000	23	24040001	24060000	-0.686735
23	23700001	23720000	23	24060001	24080000	-0.729335
23	23700001	23720000	23	24040001	24060000	-0.775322
23	23680001	23700000	23	24060001	24080000	-0.683383
3	42280001	42300000	3	42480001	42500000	0.882563
23	20540001	20560000	23	21760001	21780000	0.606865
23	20540001	20560000	23	21740001	21760000	0.62557
23	20540001	20560000	23	21500001	21520000	0.747111
23	20540001	20560000	23	21480001	21500000	0.737993
3	41940001	41960000	3	42140001	42160000	-0.612837
3	41940001	41960000	3	42120001	42140000	-0.606282
22	19480001	19500000	22	19600001	19620000	0.617719
3	38140001	38160000	3	38700001	38720000	0.608727
3	38040001	38060000	3	38180001	38200000	-0.637553
3	37880001	37900000	3	38000001	38020000	0.635099
22	17660001	17680000	22	17960001	17980000	0.633496
22	17640001	17660000	22	17960001	17980000	0.629977
3	37060001	37080000	3	37260001	37280000	-0.691075
3	37060001	37080000	3	37240001	37260000	-0.660423
3	37040001	37060000	3	37260001	37280000	-0.74148
3	36920001	36940000	3	37260001	37280000	-0.880758
3	36880001	36900000	3	37380001	37400000	-0.834787
3	32420001	32440000	3	32700001	32720000	-0.703888
3	32400001	32420000	3	32700001	32720000	-0.627911
3	32320001	32340000	3	32520001	32540000	0.751794
3	32320001	32340000	3	32500001	32520000	0.762312
3	32220001	32240000	3	32700001	32720000	0.650313
3	32220001	32240000	3	32380001	32400000	0.668269
3	32200001	32220000	3	32700001	32720000	0.608775
3	32200001	32220000	3	32400001	32420000	0.639278
3	32200001	32220000	3	32380001	32400000	0.658146
3	32200001	32220000	3	32360001	32380000	0.690858
3	31260001	31280000	3	31480001	31500000	0.710104
3	30380001	30400000	3	30660001	30680000	0.615093
3	30380001	30400000	3	30640001	30660000	0.667599
3	30360001	30380000	3	30640001	30660000	0.639159
3	30360001	30380000	3	30460001	30480000	0.916371
3	30240001	30260000	3	30720001	30740000	0.624856
3	30160001	30180000	3	30760001	30780000	0.605232
3	30160001	30180000	3	30740001	30760000	0.610996
3	30140001	30160000	3	30760001	30780000	0.651183
3	30140001	30160000	3	30740001	30760000	0.638744
3	30140001	30160000	3	30720001	30740000	0.70238
3	30120001	30140000	3	30760001	30780000	0.673627
3	30100001	30120000	3	30760001	30780000	0.651451
3	30080001	30100000	3	30760001	30780000	0.624094
3	30080001	30100000	3	30720001	30740000	0.644756
3	30060001	30080000	3	31160001	31180000	0.627236
3	30060001	30080000	3	30780001	30800000	0.651498
3	30060001	30080000	3	30760001	30780000	0.691787
3	27520001	27540000	3	28380001	28400000	-0.703171
3	27520001	27540000	3	28360001	28380000	-0.721795
3	27520001	27540000	3	27700001	27720000	-0.692254
3	27520001	27540000	3	27680001	27700000	-0.65367
3	27500001	27520000	3	28380001	28400000	-0.747913
3	27500001	27520000	3	27700001	27720000	-0.675982
3	27500001	27520000	3	27680001	27700000	-0.660914
3	27380001	27400000	3	27700001	27720000	-0.62152
3	27360001	27380000	3	27700001	27720000	-0.636927
3	27340001	27360000	3	27700001	27720000	-0.610432
22	50680001	50700000	22	50760001	50780000	0.672123
22	49160001	49180000	22	49300001	49320000	0.65937
22	46520001	46540000	22	46700001	46720000	-0.792233
22	46440001	46460000	22	46700001	46720000	-0.767105
22	46400001	46420000	22	46700001	46720000	-0.706812
22	41320001	41340000	22	41640001	41660000	0.665303
22	41300001	41320000	22	41640001	41660000	0.684963
22	41300001	41320000	22	41620001	41640000	0.64318
22	41080001	41100000	22	41160001	41180000	0.697992
22	41060001	41080000	22	41160001	41180000	0.715353
22	41060001	41080000	22	41140001	41160000	0.689004
22	40920001	40940000	22	41020001	41040000	0.63925
22	40900001	40920000	22	41040001	41060000	0.603213
22	39940001	39960000	22	40320001	40340000	0.666407
22	39560001	39580000	22	39700001	39720000	0.62603
22	37460001	37480000	22	37840001	37860000	0.751092
22	35760001	35780000	22	35980001	36000000	-0.672925
22	35740001	35760000	22	36000001	36020000	-0.656694
22	35740001	35760000	22	35960001	35980000	-0.645551
22	34500001	34520000	22	35060001	35080000	-0.763757
22	32160001	32180000	22	32340001	32360000	-0.69039
22	32140001	32160000	22	32340001	32360000	-0.74174
22	32120001	32140000	22	32340001	32360000	-0.769812
22	32060001	32080000	22	32340001	32360000	-0.684476
22	31340001	31360000	22	31680001	31700000	0.682676
22	31340001	31360000	22	31660001	31680000	0.609473
22	31340001	31360000	22	31480001	31500000	0.642167
22	31340001	31360000	22	31460001	31480000	0.651787
22	31320001	31340000	22	31480001	31500000	0.75441
22	31320001	31340000	22	31460001	31480000	0.774146
22	31160001	31180000	22	31640001	31660000	0.780756
22	31160001	31180000	22	31620001	31640000	0.771154
22	31140001	31160000	22	31640001	31660000	0.686334
22	30680001	30700000	22	30880001	30900000	0.645636
22	30680001	30700000	22	30780001	30800000	0.631664
22	30660001	30680000	22	30880001	30900000	0.677997
22	30660001	30680000	22	30860001	30880000	0.613222
22	28920001	28940000	22	29080001	29100000	0.658251
22	28440001	28460000	22	29420001	29440000	0.767469
22	28420001	28440000	22	29420001	29440000	0.736569
22	28420001	28440000	22	29360001	29380000	0.620999
22	28400001	28420000	22	29420001	29440000	0.698417
22	28260001	28280000	22	29640001	29660000	0.928006
22	26900001	26920000	22	27040001	27060000	-0.675806
22	26880001	26900000	22	27040001	27060000	-0.650523
22	24700001	24720000	22	24920001	24940000	-0.616448
22	24540001	24560000	22	24640001	24660000	0.699186
22	24520001	24540000	22	24640001	24660000	0.73415
22	23500001	23520000	22	23600001	23620000	0.604319
22	22060001	22080000	22	22300001	22320000	-0.689803
22	22040001	22060000	22	22300001	22320000	-0.709674
22	20900001	20920000	22	21040001	21060000	0.689231
22	20140001	20160000	22	20240001	20260000	0.689308
3	20080001	20100000	3	20220001	20240000	-0.861104
3	20080001	20100000	3	20200001	20220000	-0.898065
3	20040001	20060000	3	20200001	20220000	-0.88636
3	20000001	20020000	3	20220001	20240000	-0.869608
21	19060001	19080000	21	19200001	19220000	-0.614802
21	18980001	19000000	21	19280001	19300000	-0.669629
21	18980001	19000000	21	19260001	19280000	-0.623369
21	18980001	19000000	21	19160001	19180000	-0.609446
21	18900001	18920000	21	19280001	19300000	-0.778716
21	18880001	18900000	21	19260001	19280000	-0.63377
21	17100001	17120000	21	17240001	17260000	-0.744618
21	17100001	17120000	21	17220001	17240000	-0.700058
21	17080001	17100000	21	17200001	17220000	-0.685197
21	17080001	17100000	21	17180001	17200000	-0.628508
21	17060001	17080000	21	17200001	17220000	-0.688146
21	17020001	17040000	21	17280001	17300000	-0.767318
21	16880001	16900000	21	17220001	17240000	-0.620526
21	16880001	16900000	21	17200001	17220000	-0.638705
21	16240001	16260000	21	16840001	16860000	0.783006
21	16220001	16240000	21	16840001	16860000	0.852296
21	16120001	16140000	21	16960001	16980000	0.657129
21	15860001	15880000	21	16080001	16100000	-0.601354
21	15820001	15840000	21	16100001	16120000	-0.607194
21	15800001	15820000	21	16120001	16140000	-0.692628
21	15800001	15820000	21	16100001	16120000	-0.646807
21	15780001	15800000	21	16120001	16140000	-0.710012
21	15760001	15780000	21	16100001	16120000	-0.684965
21	46560001	46580000	21	46860001	46880000	-0.900006
21	46560001	46580000	21	46840001	46860000	-0.954595
21	46540001	46560000	21	46840001	46860000	-0.942377
21	45560001	45580000	21	45720001	45740000	-0.609684
21	45540001	45560000	21	45720001	45740000	-0.713653
21	44340001	44360000	21	44920001	44940000	-0.652579
21	44320001	44340000	21	44520001	44540000	-0.635032
21	41500001	41520000	21	42420001	42440000	-0.69824
21	39600001	39620000	21	39700001	39720000	0.615636
21	37500001	37520000	21	37740001	37760000	-0.632902
21	36280001	36300000	21	36380001	36400000	-0.672226
21	35380001	35400000	21	35700001	35720000	-0.689195
21	35340001	35360000	21	35720001	35740000	-0.633252
21	35300001	35320000	21	35720001	35740000	-0.601192
21	35280001	35300000	21	35720001	35740000	-0.603205
21	30480001	30500000	21	31220001	31240000	0.749341
21	30480001	30500000	21	31200001	31220000	0.735306
21	30460001	30480000	21	31200001	31220000	0.739342
21	27120001	27140000	21	27540001	27560000	0.811059
21	27100001	27120000	21	27540001	27560000	0.82612
21	26980001	27000000	21	28080001	28100000	0.666788
21	26980001	27000000	21	27540001	27560000	0.69986
21	26980001	27000000	21	27520001	27540000	0.673287
21	26960001	26980000	21	27540001	27560000	0.681104
21	26960001	26980000	21	27520001	27540000	0.679085
21	26820001	26840000	21	26920001	26940000	-0.761194
21	26800001	26820000	21	27080001	27100000	-0.754909
21	26800001	26820000	21	26940001	26960000	-0.912829
21	26800001	26820000	21	26920001	26940000	-0.827109
21	26780001	26800000	21	27080001	27100000	-0.755822
2	199400001	199420000	2	200100001	200120000	0.649295
20	18560001	18580000	20	18760001	18780000	-0.652589
20	18560001	18580000	20	20000001	20020000	0.907615
20	18540001	18560000	20	18760001	18780000	-0.610317
20	18540001	18560000	20	20000001	20020000	0.96004
20	18480001	18500000	20	20000001	20020000	0.768306
20	18460001	18480000	20	20000001	20020000	0.776061
20	18440001	18460000	20	20020001	20040000	0.839212
20	18440001	18460000	20	20000001	20020000	0.729315
20	17660001	17680000	20	17960001	17980000	-0.639595
20	17660001	17680000	20	17940001	17960000	-0.634594
20	17660001	17680000	20	17880001	17900000	-0.718886
20	17640001	17660000	20	17960001	17980000	-0.629363
20	17640001	17660000	20	17940001	17960000	-0.622157
20	17640001	17660000	20	17880001	17900000	-0.675562
2	197620001	197640000	2	198240001	198260000	-0.655029
20	17520001	17540000	20	18100001	18120000	-0.785491
20	17500001	17520000	20	18260001	18280000	-0.733888
20	17500001	17520000	20	18240001	18260000	-0.803654
20	17500001	17520000	20	17960001	17980000	-0.76929
20	17500001	17520000	20	17940001	17960000	-0.746303
20	17500001	17520000	20	17660001	17680000	-0.788071
20	17500001	17520000	20	17620001	17640000	-0.781902
20	17500001	17520000	20	17600001	17620000	-0.68214
20	17480001	17500000	20	18260001	18280000	-0.813978
20	17480001	17500000	20	18240001	18260000	-0.854329
20	17480001	17500000	20	17960001	17980000	-0.801021
20	17480001	17500000	20	17880001	17900000	-0.756122
20	17480001	17500000	20	17860001	17880000	-0.697095
2	195920001	195940000	2	196080001	196100000	0.698438
2	195240001	195260000	2	196080001	196100000	0.630281
2	195240001	195260000	2	195500001	195520000	0.701693
20	13200001	13220000	20	13760001	13780000	0.946251
20	13200001	13220000	20	13600001	13620000	0.843097
20	13100001	13120000	20	13740001	13760000	0.943438
20	13100001	13120000	20	13520001	13540000	0.968578
20	13100001	13120000	20	13500001	13520000	0.982985
20	13100001	13120000	20	13260001	13280000	0.910983
20	13100001	13120000	20	13240001	13260000	0.908519
20	13080001	13100000	20	13740001	13760000	0.937998
20	13080001	13100000	20	13240001	13260000	0.933594
2	192040001	192060000	2	192380001	192400000	-0.682053
2	192020001	192040000	2	192380001	192400000	-0.664963
2	191920001	191940000	2	192380001	192400000	-0.652959
2	191920001	191940000	2	192360001	192380000	-0.605831
2	191900001	191920000	2	192380001	192400000	-0.760953
2	191260001	191280000	2	191380001	191400000	0.725845
2	191240001	191260000	2	191380001	191400000	0.681058
20	1100001	1120000	20	1440001	1460000	0.777397
20	1080001	1100000	20	1440001	1460000	0.815503
2	190520001	190540000	2	191540001	191560000	0.623728
2	190520001	190540000	2	191520001	191540000	0.71985
20	10000001	10020000	20	10400001	10420000	-0.820967
2	190000001	190020000	2	190200001	190220000	0.78582
2	190000001	190020000	2	190180001	190200000	0.731765
20	9980001	10000000	20	10400001	10420000	-0.874526
2	189980001	190000000	2	190240001	190260000	0.797553
2	189980001	190000000	2	190220001	190240000	0.803074
2	189960001	189980000	2	190280001	190300000	0.763111
2	189960001	189980000	2	190260001	190280000	0.769789
2	189960001	189980000	2	190240001	190260000	0.77892
2	189960001	189980000	2	190220001	190240000	0.793964
2	189960001	189980000	2	190200001	190220000	0.737409
20	9940001	9960000	20	10380001	10400000	-0.779015
2	189940001	189960000	2	190260001	190280000	0.749407
20	800001	820000	20	1180001	1200000	0.713612
20	780001	800000	20	1180001	1200000	0.600207
20	62180001	62200000	20	62580001	62600000	-0.68382
20	62160001	62180000	20	62600001	62620000	-0.89098
20	62160001	62180000	20	62580001	62600000	-0.829542
20	61520001	61540000	20	61620001	61640000	0.62002
20	56180001	56200000	20	57240001	57260000	0.794617
20	5540001	5560000	20	5920001	5940000	-0.631435
20	53480001	53500000	20	53980001	54000000	-0.768402
20	50020001	50040000	20	50140001	50160000	-0.798095
20	50020001	50040000	20	50120001	50140000	-0.806914
20	50000001	50020000	20	50200001	50220000	-0.764336
20	50000001	50020000	20	50160001	50180000	-0.821986
20	49980001	50000000	20	50220001	50240000	-0.681803
20	49980001	50000000	20	50200001	50220000	-0.758148
20	49600001	49620000	20	50760001	50780000	-0.683155
20	49600001	49620000	20	50740001	50760000	-0.752562
20	48720001	48740000	20	49180001	49200000	-0.695592
20	48580001	48600000	20	49200001	49220000	-0.608728
20	48580001	48600000	20	49060001	49080000	-0.615765
20	48240001	48260000	20	48460001	48480000	-0.781169
20	48220001	48240000	20	48460001	48480000	-0.806912
20	48220001	48240000	20	48440001	48460000	-0.780379
20	48200001	48220000	20	48500001	48520000	-0.814954
20	48140001	48160000	20	48480001	48500000	-0.80409
20	48140001	48160000	20	48460001	48480000	-0.827017
20	47940001	47960000	20	48500001	48520000	-0.653104
20	47940001	47960000	20	48480001	48500000	-0.659704
20	47940001	47960000	20	48140001	48160000	-0.718099
20	47940001	47960000	20	48120001	48140000	-0.702214
20	47920001	47940000	20	48520001	48540000	-0.653648
20	47340001	47360000	20	47440001	47460000	-0.84655
20	47260001	47280000	20	47520001	47540000	-0.9083
20	47260001	47280000	20	47500001	47520000	-0.91081
20	45820001	45840000	20	46000001	46020000	-0.711896
20	44640001	44660000	20	45300001	45320000	-0.690846
20	44620001	44640000	20	45300001	45320000	-0.639067
20	42840001	42860000	20	43500001	43520000	0.724966
20	42840001	42860000	20	43100001	43120000	0.693895
20	42820001	42840000	20	43500001	43520000	0.754988
20	42820001	42840000	20	43100001	43120000	0.677354
20	40360001	40380000	20	42020001	42040000	-0.778756
20	40360001	40380000	20	41800001	41820000	-0.631501
20	36680001	36700000	20	36840001	36860000	-0.63377
2	183620001	183640000	2	183820001	183840000	0.749727
2	183520001	183540000	2	183840001	183860000	0.749647
20	340001	360000	20	620001	640000	-0.64161
20	34300001	34320000	20	35540001	35560000	-0.717001
20	34300001	34320000	20	35520001	35540000	-0.684477
20	34280001	34300000	20	35520001	35540000	-0.730455
20	320001	340000	20	620001	640000	-0.641643
20	31360001	31380000	20	31880001	31900000	0.727117
20	31280001	31300000	20	31880001	31900000	0.675307
20	3040001	3060000	20	3160001	3180000	0.744818
20	3020001	3040000	20	3280001	3300000	0.655184
20	21080001	21100000	20	21360001	21380000	-0.659896
20	20060001	20080000	20	20560001	20580000	-0.804162
20	20060001	20080000	20	20540001	20560000	-0.826022
20	20040001	20060000	20	20560001	20580000	-0.810623
20	20040001	20060000	20	20540001	20560000	-0.818868
20	20020001	20040000	20	20680001	20700000	-0.713947
20	20000001	20020000	20	21520001	21540000	0.648715
20	20000001	20020000	20	20680001	20700000	-0.649648
2	180060001	180080000	2	180200001	180220000	0.608338
19	19860001	19880000	19	20380001	20400000	0.636592
19	19780001	19800000	19	20000001	20020000	0.973972
2	179760001	179780000	2	179980001	180000000	0.641904
2	179740001	179760000	2	180000001	180020000	0.659524
2	179740001	179760000	2	179980001	180000000	0.664652
19	19660001	19680000	19	20380001	20400000	0.661539
2	179640001	179660000	2	180000001	180020000	0.697805
2	179640001	179660000	2	179980001	180000000	0.665117
19	19640001	19660000	19	19740001	19760000	0.677209
19	19640001	19660000	19	20380001	20400000	0.669374
19	19640001	19660000	19	20060001	20080000	0.942069
19	19640001	19660000	19	20040001	20060000	0.939183
2	179320001	179340000	2	180860001	180880000	0.912093
2	176980001	177000000	2	177680001	177700000	0.882898
2	176980001	177000000	2	177660001	177680000	0.902858
19	15900001	15920000	19	16520001	16540000	0.849354
19	15380001	15400000	19	15660001	15680000	-0.798173
19	15360001	15380000	19	15660001	15680000	-0.775723
19	15320001	15340000	19	15660001	15680000	-0.700845
19	15300001	15320000	19	15660001	15680000	-0.660382
2	173020001	173040000	2	173560001	173580000	0.633604
2	172960001	172980000	2	173320001	173340000	0.629526
2	172940001	172960000	2	173320001	173340000	0.660815
19	12660001	12680000	19	12940001	12960000	0.847254
2	172540001	172560000	2	173560001	173580000	0.781383
2	172440001	172460000	2	173560001	173580000	0.797712
2	172440001	172460000	2	173540001	173560000	0.808082
2	172420001	172440000	2	173560001	173580000	0.819766
2	171820001	171840000	2	172160001	172180000	0.615889
2	171660001	171680000	2	172940001	172960000	-0.63499
2	171340001	171360000	2	171660001	171680000	0.60971
19	11140001	11160000	19	11300001	11320000	-0.615285
19	10820001	10840000	19	10960001	10980000	-0.793545
19	10820001	10840000	19	10940001	10960000	-0.705339
19	10380001	10400000	19	10780001	10800000	-0.943903
19	10220001	10240000	19	10500001	10520000	-0.623229
19	10200001	10220000	19	10500001	10520000	-0.651673
19	10040001	10060000	19	10500001	10520000	0.601908
19	10040001	10060000	19	10480001	10500000	0.674579
19	10040001	10060000	19	10360001	10380000	0.658502
2	167540001	167560000	2	168960001	168980000	0.616559
19	58240001	58260000	19	58660001	58680000	0.613342
19	57920001	57940000	19	58660001	58680000	0.809517
19	57900001	57920000	19	58660001	58680000	0.840121
19	56900001	56920000	19	58660001	58680000	-0.687255
19	56020001	56040000	19	56120001	56140000	0.651218
19	54980001	55000000	19	55180001	55200000	-0.697145
19	5040001	5060000	19	5580001	5600000	0.615399
19	5040001	5060000	19	5560001	5580000	0.62773
19	5040001	5060000	19	5460001	5480000	0.650807
19	49720001	49740000	19	49940001	49960000	0.656087
19	49360001	49380000	19	49460001	49480000	0.66218
19	49340001	49360000	19	49460001	49480000	0.63766
19	49140001	49160000	19	49460001	49480000	0.657756
19	49000001	49020000	19	49100001	49120000	0.729467
19	49000001	49020000	19	49080001	49100000	0.691227
19	48980001	49000000	19	49100001	49120000	0.731904
19	48980001	49000000	19	49080001	49100000	0.771744
19	4880001	4900000	19	5020001	5040000	-0.792267
19	4860001	4880000	19	5020001	5040000	-0.792718
19	4840001	4860000	19	5020001	5040000	-0.710913
19	4800001	4820000	19	5020001	5040000	-0.749412
19	47360001	47380000	19	47520001	47540000	-0.761969
19	47360001	47380000	19	47500001	47520000	-0.711683
19	47360001	47380000	19	47480001	47500000	-0.651717
19	47340001	47360000	19	47540001	47560000	-0.831969
19	47120001	47140000	19	47760001	47780000	-0.620339
19	46540001	46560000	19	46980001	47000000	-0.622041
19	46540001	46560000	19	46960001	46980000	-0.634555
19	46540001	46560000	19	46760001	46780000	-0.714722
19	46520001	46540000	19	47000001	47020000	-0.831481
19	46520001	46540000	19	46980001	47000000	-0.74837
19	46520001	46540000	19	46760001	46780000	-0.737799
19	45400001	45420000	19	45840001	45860000	-0.707823
19	45400001	45420000	19	45820001	45840000	-0.770572
19	42600001	42620000	19	42920001	42940000	-0.607176
19	41700001	41720000	19	41820001	41840000	-0.625367
19	41160001	41180000	19	41320001	41340000	-0.714095
19	41160001	41180000	19	41300001	41320000	-0.675652
19	40380001	40400000	19	40480001	40500000	0.694068
19	40380001	40400000	19	40460001	40480000	0.614988
19	39600001	39620000	19	39900001	39920000	-0.711444
19	39600001	39620000	19	39820001	39840000	-0.643837
19	39600001	39620000	19	39800001	39820000	-0.612515
19	39240001	39260000	19	39380001	39400000	-0.652408
19	39220001	39240000	19	39400001	39420000	-0.72967
19	39220001	39240000	19	39380001	39400000	-0.685736
19	39220001	39240000	19	39360001	39380000	-0.626948
19	39120001	39140000	19	39400001	39420000	-0.674515
19	39020001	39040000	19	39400001	39420000	-0.608489
19	39020001	39040000	19	39380001	39400000	-0.628199
19	39020001	39040000	19	39180001	39200000	-0.624444
19	39000001	39020000	19	39400001	39420000	-0.606092
19	38880001	38900000	19	39400001	39420000	-0.800329
19	38880001	38900000	19	39380001	39400000	-0.769101
19	38880001	38900000	19	39360001	39380000	-0.742654
19	38880001	38900000	19	39340001	39360000	-0.760365
19	38380001	38400000	19	38820001	38840000	0.651172
19	38380001	38400000	19	38800001	38820000	0.613127
19	38380001	38400000	19	38700001	38720000	0.649364
19	35580001	35600000	19	35960001	35980000	0.664733
19	35560001	35580000	19	35980001	36000000	0.745038
19	35560001	35580000	19	35960001	35980000	0.722626
19	35560001	35580000	19	35940001	35960000	0.662107
19	35540001	35560000	19	35960001	35980000	0.799937
19	33920001	33940000	19	34560001	34580000	-0.75499
19	33920001	33940000	19	34260001	34280000	-0.693575
19	33920001	33940000	19	34240001	34260000	-0.707646
19	33900001	33920000	19	34260001	34280000	-0.695204
19	33900001	33920000	19	34240001	34260000	-0.704887
19	33720001	33740000	19	33900001	33920000	-0.758736
19	33720001	33740000	19	33880001	33900000	-0.847414
19	33700001	33720000	19	34260001	34280000	-0.721309
19	33620001	33640000	19	33880001	33900000	-0.850228
19	30240001	30260000	19	30360001	30380000	0.611444
19	30240001	30260000	19	30340001	30360000	0.627959
2	162400001	162420000	2	162660001	162680000	0.637891
19	21840001	21860000	19	22260001	22280000	-0.680575
19	21800001	21820000	19	22220001	22240000	-0.659521
19	20100001	20120000	19	20380001	20400000	0.692966
2	158880001	158900000	2	159600001	159620000	0.659995
18	18680001	18700000	18	19300001	19320000	-0.613799
2	158640001	158660000	2	159600001	159620000	0.631183
2	158620001	158640000	2	159600001	159620000	0.622046
2	154280001	154300000	2	154480001	154500000	0.600517
18	9100001	9120000	18	9900001	9920000	-0.671769
18	7620001	7640000	18	7960001	7980000	0.817458
18	74740001	74760000	18	75120001	75140000	-0.667975
18	74720001	74740000	18	75160001	75180000	-0.740157
18	74720001	74740000	18	75140001	75160000	-0.70238
18	74700001	74720000	18	75360001	75380000	-0.780775
18	74700001	74720000	18	75340001	75360000	-0.779665
18	74680001	74700000	18	75340001	75360000	-0.75759
18	74660001	74680000	18	75360001	75380000	-0.772477
18	74660001	74680000	18	75340001	75360000	-0.743609
18	74640001	74660000	18	75360001	75380000	-0.765764
18	74600001	74620000	18	75360001	75380000	-0.778999
18	74600001	74620000	18	75340001	75360000	-0.764955
18	74500001	74520000	18	75360001	75380000	-0.736574
18	74480001	74500000	18	75360001	75380000	-0.714841
2	147360001	147380000	2	147460001	147480000	0.610103
18	72260001	72280000	18	72920001	72940000	0.626073
18	72240001	72260000	18	72920001	72940000	0.625483
18	72020001	72040000	18	72140001	72160000	0.669498
18	72000001	72020000	18	72160001	72180000	0.619627
18	68260001	68280000	18	68600001	68620000	0.903225
18	65180001	65200000	18	66380001	66400000	0.632174
18	65160001	65180000	18	66360001	66380000	0.627635
18	64860001	64880000	18	66300001	66320000	0.610438
18	6240001	6260000	18	6860001	6880000	0.852858
18	61000001	61020000	18	61100001	61120000	-0.701438
18	57660001	57680000	18	59160001	59180000	-0.618006
18	57500001	57520000	18	57620001	57640000	-0.693328
18	54280001	54300000	18	54360001	54380000	-0.836561
18	5100001	5120000	18	5300001	5320000	0.622921
18	5100001	5120000	18	5280001	5300000	0.668013
18	4460001	4480000	18	6120001	6140000	0.768121
18	42260001	42280000	18	42360001	42380000	-0.755349
18	42240001	42260000	18	42780001	42800000	-0.863037
18	41200001	41220000	18	42960001	42980000	-0.808874
18	3280001	3300000	18	3980001	4000000	-0.77932
18	3260001	3280000	18	3980001	4000000	-0.829466
18	2720001	2740000	18	2940001	2960000	-0.632517
18	23500001	23520000	18	23720001	23740000	-0.624778
18	21080001	21100000	18	21160001	21180000	-0.623865
17	1620001	1640000	17	1940001	1960000	0.733311
17	1600001	1620000	17	1940001	1960000	0.734028
17	1580001	1600000	17	1940001	1960000	0.712154
17	1560001	1580000	17	1940001	1960000	0.715632
17	1560001	1580000	17	1920001	1940000	0.646313
17	1560001	1580000	17	2300001	2320000	0.753062
17	15160001	15180000	17	15880001	15900000	-0.62419
17	13500001	13520000	17	14260001	14280000	-0.792416
17	13500001	13520000	17	14200001	14220000	-0.845282
17	13480001	13500000	17	14200001	14220000	-0.713459
2	130920001	130940000	2	131100001	131120000	0.634832
17	10380001	10400000	17	10780001	10800000	0.618537
17	10360001	10380000	17	10920001	10940000	0.7788
17	9940001	9960000	17	10100001	10120000	-0.626689
17	9840001	9860000	17	10500001	10520000	-0.601803
17	9820001	9840000	17	10520001	10540000	-0.636898
17	9820001	9840000	17	10500001	10520000	-0.601545
17	8800001	8820000	17	8880001	8900000	-0.722133
17	8780001	8800000	17	8880001	8900000	-0.660434
17	8320001	8340000	17	8880001	8900000	-0.612432
17	78260001	78280000	17	78340001	78360000	-0.664655
17	77780001	77800000	17	79360001	79380000	-0.690043
17	77780001	77800000	17	79300001	79320000	-0.729636
17	77760001	77780000	17	79360001	79380000	-0.725784
17	7720001	7740000	17	7880001	7900000	0.620488
17	77060001	77080000	17	77680001	77700000	-0.668955
17	7700001	7720000	17	7920001	7940000	0.689664
17	7700001	7720000	17	7900001	7920000	0.658618
17	7660001	7680000	17	7920001	7940000	0.792903
17	7660001	7680000	17	7900001	7920000	0.787963
17	7640001	7660000	17	8240001	8260000	0.944667
17	7640001	7660000	17	7920001	7940000	0.822623
17	76280001	76300000	17	76420001	76440000	0.654419
17	76280001	76300000	17	76400001	76420000	0.659423
17	76260001	76280000	17	76400001	76420000	0.64355
17	76260001	76280000	17	76380001	76400000	0.652646
17	76260001	76280000	17	76340001	76360000	0.663624
17	76080001	76100000	17	76400001	76420000	0.757002
17	76080001	76100000	17	76160001	76180000	0.834209
17	75760001	75780000	17	76020001	76040000	0.649016
17	75760001	75780000	17	76000001	76020000	0.654155
17	75540001	75560000	17	75760001	75780000	0.795554
17	75540001	75560000	17	75740001	75760000	0.753851
[truncated: 11,111 more rows]

## Sheet: Table S4-3
Table S4. loops that strength corrlelation with clinical parameters of SLE patients
Table S4-3. loops that strength corrlelation with RBC numbers of SLE patients
chrA	start	end	chrB	start	end	The correlation coefficient
10	17660001	17680000	10	18940001	18960000	0.647521
10	14600001	14620000	10	14680001	14700000	0.763017
10	14560001	14580000	10	14660001	14680000	0.766503
10	14540001	14560000	10	15120001	15140000	-0.61597
10	135240001	135260000	10	135320001	135340000	0.616249
10	135140001	135160000	10	135320001	135340000	0.887505
10	135120001	135140000	10	135320001	135340000	0.887508
10	135120001	135140000	10	135240001	135260000	0.760042
10	134280001	134300000	10	134440001	134460000	0.692896
10	134260001	134280000	10	134440001	134460000	0.707225
10	134200001	134220000	10	134440001	134460000	0.761529
10	134180001	134200000	10	134440001	134460000	0.761872
10	132000001	132020000	10	133600001	133620000	-0.69952
10	131980001	132000000	10	133620001	133640000	-0.672297
10	130000001	130020000	10	131920001	131940000	0.691803
10	130000001	130020000	10	131900001	131920000	0.710457
10	129860001	129880000	10	129940001	129960000	-0.879561
10	129840001	129860000	10	129940001	129960000	-0.865388
10	129820001	129840000	10	129940001	129960000	-0.850157
10	126320001	126340000	10	126400001	126420000	-0.694269
10	125760001	125780000	10	126520001	126540000	0.845632
10	125740001	125760000	10	126440001	126460000	0.858129
10	125740001	125760000	10	126420001	126440000	0.803187
10	124900001	124920000	10	125000001	125020000	0.63429
10	124760001	124780000	10	126080001	126100000	0.73763
10	124760001	124780000	10	124900001	124920000	0.605966
10	124740001	124760000	10	126100001	126120000	0.791812
10	124740001	124760000	10	124900001	124920000	0.705834
10	124720001	124740000	10	124900001	124920000	0.656079
10	124680001	124700000	10	125320001	125340000	0.65176
10	124660001	124680000	10	125300001	125320000	0.70621
10	124140001	124160000	10	124900001	124920000	0.703607
10	124100001	124120000	10	124180001	124200000	-0.62393
10	120660001	120680000	10	121720001	121740000	-0.758496
10	118960001	118980000	10	120000001	120020000	-0.693591
10	118960001	118980000	10	119980001	120000000	-0.652909
10	118420001	118440000	10	118520001	118540000	0.611291
10	116220001	116240000	10	116300001	116320000	0.615043
10	116040001	116060000	10	116880001	116900000	-0.683592
10	115720001	115740000	10	115840001	115860000	-0.928837
10	115700001	115720000	10	115820001	115840000	-0.949387
10	115560001	115580000	10	115860001	115880000	-0.747663
10	115560001	115580000	10	115840001	115860000	-0.77988
10	115540001	115560000	10	115860001	115880000	-0.699458
10	115460001	115480000	10	115860001	115880000	-0.69124
10	115440001	115460000	10	115880001	115900000	-0.637869
10	115440001	115460000	10	115860001	115880000	-0.67168
10	11340001	11360000	10	11500001	11520000	0.692305
10	11340001	11360000	10	11480001	11500000	0.696627
10	112340001	112360000	10	112640001	112660000	0.64409
10	112060001	112080000	10	112660001	112680000	0.656731
10	11160001	11180000	10	11280001	11300000	0.908697
10	11160001	11180000	10	11260001	11280000	0.88491
10	11160001	11180000	10	11240001	11260000	0.843115
10	11140001	11160000	10	11500001	11520000	0.799347
10	11060001	11080000	10	11200001	11220000	-0.764298
10	11060001	11080000	10	11180001	11200000	-0.775676
10	109900001	109920000	10	110060001	110080000	0.650264
10	105660001	105680000	10	105860001	105880000	-0.615521
10	105660001	105680000	10	105740001	105760000	-0.63598
10	105640001	105660000	10	105880001	105900000	-0.622815
10	105640001	105660000	10	105860001	105880000	-0.648832
10	105640001	105660000	10	105740001	105760000	-0.700364
10	105480001	105500000	10	105600001	105620000	-0.681491
10	105460001	105480000	10	105620001	105640000	-0.636302
10	105160001	105180000	10	105240001	105260000	-0.612661
10	104680001	104700000	10	104820001	104840000	-0.666016
10	104660001	104680000	10	104820001	104840000	-0.674062
10	104620001	104640000	10	104820001	104840000	-0.665054
10	104580001	104600000	10	105000001	105020000	-0.770203
10	104140001	104160000	10	104340001	104360000	0.617987
10	104140001	104160000	10	104240001	104260000	0.681316
10	104140001	104160000	10	104220001	104240000	0.667934
10	102100001	102120000	10	102180001	102200000	-0.601598
10	101600001	101620000	10	101800001	101820000	-0.679874
10	101600001	101620000	10	101780001	101800000	-0.718357
10	100220001	100240000	10	100420001	100440000	-0.733077
10	99660001	99680000	10	99800001	99820000	-0.725835
10	99520001	99540000	10	99780001	99800000	-0.607327
10	98820001	98840000	10	98960001	98980000	-0.782154
10	98800001	98820000	10	98960001	98980000	-0.763128
10	97440001	97460000	10	97600001	97620000	-0.615286
10	97180001	97200000	10	97360001	97380000	-0.727128
10	96980001	97000000	10	97100001	97120000	-0.832881
10	96900001	96920000	10	97100001	97120000	-0.777381
10	96880001	96900000	10	97120001	97140000	-0.741521
10	9560001	9580000	10	9720001	9740000	-0.663046
10	95140001	95160000	10	95240001	95260000	-0.781574
10	95120001	95140000	10	95240001	95260000	-0.755087
10	94860001	94880000	10	95240001	95260000	0.842383
10	94840001	94860000	10	95260001	95280000	0.803106
10	94840001	94860000	10	95240001	95260000	0.85619
10	94640001	94660000	10	95260001	95280000	0.703014
10	94640001	94660000	10	95240001	95260000	0.682201
10	94620001	94640000	10	95240001	95260000	0.680409
10	94600001	94620000	10	95460001	95480000	0.888129
10	94600001	94620000	10	95260001	95280000	0.690824
10	94600001	94620000	10	95240001	95260000	0.726068
10	9380001	9400000	10	11320001	11340000	-0.780404
10	9380001	9400000	10	11300001	11320000	-0.719805
10	9380001	9400000	10	11260001	11280000	-0.660841
10	9380001	9400000	10	10720001	10740000	-0.745775
10	92920001	92940000	10	92980001	93000000	0.854683
10	92900001	92920000	10	92980001	93000000	0.851885
10	92880001	92900000	10	92980001	93000000	0.812085
10	92860001	92880000	10	93000001	93020000	0.817711
10	92840001	92860000	10	93000001	93020000	0.789076
10	92640001	92660000	10	93680001	93700000	0.646535
10	92640001	92660000	10	93660001	93680000	0.737086
10	92620001	92640000	10	93660001	93680000	0.749299
10	91180001	91200000	10	92620001	92640000	0.719346
10	85900001	85920000	10	86100001	86120000	0.636179
10	85900001	85920000	10	86080001	86100000	0.609268
10	85060001	85080000	10	85140001	85160000	0.705502
10	7920001	7940000	10	9300001	9320000	-0.62368
10	7920001	7940000	10	9240001	9260000	-0.743618
10	7900001	7920000	10	9300001	9320000	-0.618516
10	7900001	7920000	10	9240001	9260000	-0.724649
10	75640001	75660000	10	75840001	75860000	-0.764218
10	75640001	75660000	10	75820001	75840000	-0.733227
10	75620001	75640000	10	75820001	75840000	-0.717797
10	74140001	74160000	10	74700001	74720000	-0.627103
10	74120001	74140000	10	74600001	74620000	-0.665349
10	74120001	74140000	10	74580001	74600000	-0.626554
10	74120001	74140000	10	74440001	74460000	-0.712885
10	74120001	74140000	10	74420001	74440000	-0.73461
10	74120001	74140000	10	74380001	74400000	-0.722419
10	74000001	74020000	10	74080001	74100000	0.886862
10	73700001	73720000	10	74880001	74900000	-0.851943
10	73480001	73500000	10	74060001	74080000	0.631751
10	73060001	73080000	10	73320001	73340000	-0.898433
10	72300001	72320000	10	72500001	72520000	-0.637925
10	71280001	71300000	10	71380001	71400000	0.638861
10	71260001	71280000	10	71380001	71400000	0.633847
10	71160001	71180000	10	71380001	71400000	0.794438
10	71160001	71180000	10	71260001	71280000	0.691684
10	71000001	71020000	10	71400001	71420000	0.760015
10	71000001	71020000	10	71380001	71400000	0.773069
10	71000001	71020000	10	71260001	71280000	0.663032
10	70980001	71000000	10	71400001	71420000	0.81131
10	70980001	71000000	10	71380001	71400000	0.823746
10	70980001	71000000	10	71260001	71280000	0.655266
10	6960001	6980000	10	7460001	7480000	-0.678731
10	6960001	6980000	10	7440001	7460000	-0.652883
10	6940001	6960000	10	7460001	7480000	-0.699889
10	6940001	6960000	10	7440001	7460000	-0.686836
10	69440001	69460000	10	69540001	69560000	0.678923
10	69440001	69460000	10	69520001	69540000	0.685561
10	6840001	6860000	10	7640001	7660000	-0.750109
10	6840001	6860000	10	7460001	7480000	-0.803978
10	63800001	63820000	10	64000001	64020000	0.94042
10	63800001	63820000	10	63980001	64000000	0.937066
10	63780001	63800000	10	64000001	64020000	0.870916
10	63660001	63680000	10	64000001	64020000	0.743935
10	63660001	63680000	10	63980001	64000000	0.603128
10	63640001	63660000	10	64000001	64020000	0.704034
10	60040001	60060000	10	60140001	60160000	0.666895
10	59940001	59960000	10	60140001	60160000	0.604925
10	53700001	53720000	10	53980001	54000000	0.756235
10	5120001	5140000	10	5420001	5440000	-0.712446
10	5120001	5140000	10	5400001	5420000	-0.683912
10	50600001	50620000	10	50720001	50740000	-0.672137
10	50600001	50620000	10	50700001	50720000	-0.645024
10	50360001	50380000	10	50700001	50720000	-0.855362
10	50180001	50200000	10	50720001	50740000	-0.940681
10	49860001	49880000	10	50720001	50740000	-0.952205
10	49860001	49880000	10	50700001	50720000	-0.911514
10	45960001	45980000	10	46140001	46160000	0.739415
10	45960001	45980000	10	46120001	46140000	0.737905
10	45760001	45780000	10	45920001	45940000	0.68322
10	45740001	45760000	10	46140001	46160000	0.858485
10	45740001	45760000	10	46120001	46140000	0.848369
10	35380001	35400000	10	35840001	35860000	0.620629
10	35380001	35400000	10	35820001	35840000	0.64221
10	35380001	35400000	10	35800001	35820000	0.620134
10	32340001	32360000	10	32640001	32660000	-0.640813
10	32320001	32340000	10	32600001	32620000	-0.704945
10	32320001	32340000	10	32560001	32580000	-0.745608
10	32140001	32160000	10	32300001	32320000	-0.906191
10	32140001	32160000	10	32280001	32300000	-0.884789
10	32120001	32140000	10	32480001	32500000	-0.600847
10	30300001	30320000	10	30840001	30860000	0.690496
10	30280001	30300000	10	30840001	30860000	0.654129
10	28560001	28580000	10	28660001	28680000	0.708525
10	28540001	28560000	10	28660001	28680000	0.753851
10	28460001	28480000	10	28660001	28680000	0.739639
10	27840001	27860000	10	27940001	27960000	-0.746647
10	27520001	27540000	10	27780001	27800000	0.806861
10	26980001	27000000	10	27140001	27160000	-0.627663
10	26720001	26740000	10	26800001	26820000	-0.69207
10	26720001	26740000	10	26780001	26800000	-0.744595
10	26700001	26720000	10	26780001	26800000	-0.60782
10	26640001	26660000	10	27620001	27640000	-0.700281
10	26620001	26640000	10	27580001	27600000	-0.657021
10	26620001	26640000	10	26820001	26840000	-0.62972
10	26620001	26640000	10	26780001	26800000	-0.754787
10	26600001	26620000	10	27580001	27600000	-0.676447
10	22520001	22540000	10	22620001	22640000	0.787521
10	22520001	22540000	10	22600001	22620000	0.89316
9	18900001	18920000	9	19540001	19560000	-0.861867
9	18240001	18260000	9	19460001	19480000	-0.797494
9	18240001	18260000	9	19440001	19460000	-0.742622
9	136060001	136080000	9	136340001	136360000	0.609276
9	136040001	136060000	9	136340001	136360000	0.741766
9	134660001	134680000	9	134980001	135000000	-0.742733
9	134320001	134340000	9	135140001	135160000	-0.713207
9	134020001	134040000	9	135180001	135200000	-0.730954
9	134020001	134040000	9	135160001	135180000	-0.736099
9	134000001	134020000	9	135180001	135200000	-0.672135
9	134000001	134020000	9	135160001	135180000	-0.659926
9	132860001	132880000	9	133000001	133020000	-0.604332
9	132860001	132880000	9	132980001	133000000	-0.667879
9	131880001	131900000	9	132820001	132840000	0.82898
9	131860001	131880000	9	132640001	132660000	0.751098
9	131600001	131620000	9	132380001	132400000	0.899168
9	131020001	131040000	9	131740001	131760000	0.723544
9	130500001	130520000	9	130660001	130680000	0.619722
9	129060001	129080000	9	129240001	129260000	-0.656478
9	126880001	126900000	9	127080001	127100000	-0.713002
9	126880001	126900000	9	127060001	127080000	-0.68227
9	126320001	126340000	9	126780001	126800000	-0.656121
9	126300001	126320000	9	126800001	126820000	-0.698064
9	124880001	124900000	9	125560001	125580000	0.678386
9	124860001	124880000	9	125560001	125580000	0.809083
9	114360001	114380000	9	114840001	114860000	0.605711
9	114360001	114380000	9	114820001	114840000	0.709153
9	113340001	113360000	9	113980001	114000000	-0.796722
9	110000001	110020000	9	110100001	110120000	-0.65592
9	109980001	110000000	9	110100001	110120000	-0.717849
9	105160001	105180000	9	105660001	105680000	0.638287
9	104160001	104180000	9	104300001	104320000	0.72216
9	104160001	104180000	9	104280001	104300000	0.750731
9	104140001	104160000	9	104300001	104320000	0.739945
9	104140001	104160000	9	104280001	104300000	0.766887
9	99620001	99640000	9	100360001	100380000	0.668165
9	99600001	99620000	9	100380001	100400000	0.668094
9	99600001	99620000	9	100360001	100380000	0.632703
9	98260001	98280000	9	98640001	98660000	0.841093
9	98260001	98280000	9	98620001	98640000	0.866165
9	98260001	98280000	9	98480001	98500000	0.721554
9	98240001	98260000	9	98780001	98800000	0.815374
9	98240001	98260000	9	98640001	98660000	0.832983
9	95700001	95720000	9	96320001	96340000	0.621469
9	95080001	95100000	9	95200001	95220000	-0.761862
9	94900001	94920000	9	95200001	95220000	-0.636225
9	94900001	94920000	9	95180001	95200000	-0.717361
9	94880001	94900000	9	95180001	95200000	-0.758399
9	93820001	93840000	9	94000001	94020000	-0.612779
9	93800001	93820000	9	94180001	94200000	-0.642017
9	93800001	93820000	9	94160001	94180000	-0.657052
9	93780001	93800000	9	94200001	94220000	-0.614077
9	93780001	93800000	9	94180001	94200000	-0.625593
9	92480001	92500000	9	92820001	92840000	-0.695701
9	89120001	89140000	9	89920001	89940000	-0.655181
9	89040001	89060000	9	89920001	89940000	-0.609204
9	89020001	89040000	9	89920001	89940000	-0.602674
9	88820001	88840000	9	89940001	89960000	-0.757935
9	88300001	88320000	9	88400001	88420000	-0.619254
9	88280001	88300000	9	88380001	88400000	-0.633662
9	88260001	88280000	9	88400001	88420000	-0.74425
9	88180001	88200000	9	88400001	88420000	-0.643728
9	86560001	86580000	9	86900001	86920000	-0.619405
9	86540001	86560000	9	86920001	86940000	-0.645494
9	86540001	86560000	9	86900001	86920000	-0.6575
9	86240001	86260000	9	86420001	86440000	0.900191
9	86200001	86220000	9	86480001	86500000	0.749511
9	82180001	82200000	9	82300001	82320000	-0.679318
9	79020001	79040000	9	79780001	79800000	0.659501
9	79020001	79040000	9	79760001	79780000	0.70939
9	77800001	77820000	9	79000001	79020000	0.648592
9	77760001	77780000	9	79000001	79020000	0.6427
9	77700001	77720000	9	77780001	77800000	-0.682271
9	77380001	77400000	9	77840001	77860000	-0.641997
9	75820001	75840000	9	77340001	77360000	-0.798009
9	75820001	75840000	9	77160001	77180000	-0.733871
9	75780001	75800000	9	77560001	77580000	-0.73224
9	75760001	75780000	9	77640001	77660000	-0.661039
9	74200001	74220000	9	74620001	74640000	-0.603549
9	72800001	72820000	9	73200001	73220000	-0.799988
9	72360001	72380000	9	73020001	73040000	0.642113
9	71660001	71680000	9	71800001	71820000	-0.63239
9	71200001	71220000	9	71800001	71820000	-0.867596
9	71200001	71220000	9	71780001	71800000	-0.79862
9	71180001	71200000	9	71800001	71820000	-0.759534
9	6680001	6700000	9	6760001	6780000	0.665771
9	35120001	35140000	9	35460001	35480000	-0.613901
9	33380001	33400000	9	33740001	33760000	0.607504
9	26740001	26760000	9	26980001	27000000	-0.734231
9	26740001	26760000	9	26960001	26980000	-0.718762
9	26720001	26740000	9	26980001	27000000	-0.669453
9	21820001	21840000	9	22440001	22460000	0.622782
9	21820001	21840000	9	22120001	22140000	0.621474
8	17800001	17820000	8	17900001	17920000	-0.83967
8	17780001	17800000	8	17920001	17940000	-0.642215
8	1640001	1660000	8	2180001	2200000	0.680684
8	16300001	16320000	8	16500001	16520000	-0.722023
8	146060001	146080000	8	146220001	146240000	0.625945
8	146040001	146060000	8	146220001	146240000	0.71957
8	145760001	145780000	8	145940001	145960000	0.606242
8	144460001	144480000	8	144620001	144640000	0.882049
8	144460001	144480000	8	144600001	144620000	0.862239
8	144460001	144480000	8	144580001	144600000	0.684969
8	142200001	142220000	8	142440001	142460000	0.976233
8	142200001	142220000	8	142340001	142360000	0.695914
8	142180001	142200000	8	142440001	142460000	0.957884
8	142180001	142200000	8	142340001	142360000	0.653437
8	141840001	141860000	8	142180001	142200000	0.783773
8	141840001	141860000	8	142100001	142120000	0.6719
8	141840001	141860000	8	142080001	142100000	0.73471
8	141820001	141840000	8	142180001	142200000	0.773255
8	141820001	141840000	8	142080001	142100000	0.711131
8	135060001	135080000	8	135680001	135700000	-0.82091
8	135040001	135060000	8	135680001	135700000	-0.83078
8	134060001	134080000	8	134180001	134200000	-0.605584
8	129000001	129020000	8	129660001	129680000	0.625713
8	128780001	128800000	8	129000001	129020000	0.635584
8	128760001	128780000	8	129020001	129040000	0.61154
8	128760001	128780000	8	129000001	129020000	0.695902
8	128760001	128780000	8	128980001	129000000	0.726072
8	128740001	128760000	8	129860001	129880000	-0.605051
8	128720001	128740000	8	129860001	129880000	-0.66085
8	126120001	126140000	8	127280001	127300000	-0.761031
8	125040001	125060000	8	125420001	125440000	-0.819399
8	124920001	124940000	8	125400001	125420000	0.674155
8	124840001	124860000	8	125420001	125440000	0.773277
8	124800001	124820000	8	125440001	125460000	0.784117
8	124540001	124560000	8	125440001	125460000	0.883664
8	124420001	124440000	8	125460001	125480000	0.706249
8	124400001	124420000	8	125460001	125480000	0.694237
8	124260001	124280000	8	125460001	125480000	0.842781
8	124160001	124180000	8	125460001	125480000	0.804831
8	124140001	124160000	8	125480001	125500000	0.71469
8	124060001	124080000	8	124140001	124160000	-0.692832
8	124040001	124060000	8	124160001	124180000	-0.809017
8	124040001	124060000	8	124140001	124160000	-0.760044
8	123800001	123820000	8	125460001	125480000	0.686979
8	118520001	118540000	8	119100001	119120000	0.606811
8	118500001	118520000	8	119120001	119140000	0.615951
8	118480001	118500000	8	119120001	119140000	0.648481
8	116440001	116460000	8	116680001	116700000	-0.758528
8	116440001	116460000	8	116660001	116680000	-0.804223
8	11620001	11640000	8	11720001	11740000	0.697903
8	109460001	109480000	8	110540001	110560000	0.873495
8	109440001	109460000	8	110540001	110560000	0.897832
8	109240001	109260000	8	110340001	110360000	0.632408
8	109220001	109240000	8	110320001	110340000	0.689606
8	108280001	108300000	8	108600001	108620000	0.616469
8	106800001	106820000	8	107580001	107600000	0.654883
8	102680001	102700000	8	103180001	103200000	-0.613637
8	102660001	102680000	8	103200001	103220000	-0.627207
8	102660001	102680000	8	103180001	103200000	-0.620624
8	102640001	102660000	8	103180001	103200000	-0.638825
8	101580001	101600000	8	101920001	101940000	0.770372
8	101580001	101600000	8	101840001	101860000	0.607467
8	101580001	101600000	8	101820001	101840000	0.621687
8	101580001	101600000	8	101720001	101740000	0.852746
8	101580001	101600000	8	101700001	101720000	0.857497
8	101560001	101580000	8	101840001	101860000	0.606668
8	101560001	101580000	8	101820001	101840000	0.63979
8	101560001	101580000	8	101720001	101740000	0.84722
8	101440001	101460000	8	101520001	101540000	-0.807756
8	101160001	101180000	8	102220001	102240000	0.613447
8	101160001	101180000	8	102200001	102220000	0.602833
8	101160001	101180000	8	101940001	101960000	0.67816
8	101160001	101180000	8	101920001	101940000	0.698095
8	99960001	99980000	8	100360001	100380000	-0.676877
8	94760001	94780000	8	95900001	95920000	0.825118
8	94740001	94760000	8	95820001	95840000	0.811631
8	92520001	92540000	8	92880001	92900000	0.807792
8	91000001	91020000	8	91640001	91660000	0.633779
8	91000001	91020000	8	91580001	91600000	0.604904
8	91000001	91020000	8	91560001	91580000	0.622528
8	90860001	90880000	8	91600001	91620000	0.60535
8	90860001	90880000	8	91580001	91600000	0.608383
8	90860001	90880000	8	91560001	91580000	0.614462
8	80980001	81000000	8	81500001	81520000	0.710781
8	80980001	81000000	8	81420001	81440000	0.78411
8	80980001	81000000	8	81400001	81420000	0.76697
8	80980001	81000000	8	81380001	81400000	0.728556
8	80960001	80980000	8	81400001	81420000	0.824854
8	77300001	77320000	8	78280001	78300000	-0.744592
8	74660001	74680000	8	74780001	74800000	-0.784106
8	72740001	72760000	8	73060001	73080000	-0.737889
8	72740001	72760000	8	72900001	72920000	-0.642398
8	72720001	72740000	8	73060001	73080000	-0.746831
8	71500001	71520000	8	71580001	71600000	0.791829
8	71500001	71520000	8	71560001	71580000	0.782526
8	71480001	71500000	8	71580001	71600000	0.795571
8	71480001	71500000	8	71560001	71580000	0.765378
8	67360001	67380000	8	67440001	67460000	-0.696204
8	66540001	66560000	8	67540001	67560000	0.655695
8	6440001	6460000	8	6620001	6640000	-0.605852
8	63940001	63960000	8	64060001	64080000	-0.701529
8	6280001	6300000	8	6440001	6460000	-0.642905
8	6280001	6300000	8	6420001	6440000	-0.649651
8	61560001	61580000	8	62620001	62640000	0.848595
8	58480001	58500000	8	59300001	59320000	-0.632914
8	58480001	58500000	8	59280001	59300000	-0.623942
8	58340001	58360000	8	59420001	59440000	-0.887933
8	58340001	58360000	8	59300001	59320000	-0.872497
8	58340001	58360000	8	59280001	59300000	-0.839936
8	58320001	58340000	8	59420001	59440000	-0.897764
8	58320001	58340000	8	59400001	59420000	-0.868081
8	58320001	58340000	8	59380001	59400000	-0.841522
8	58320001	58340000	8	59360001	59380000	-0.826266
8	58320001	58340000	8	59300001	59320000	-0.860677
8	58320001	58340000	8	59280001	59300000	-0.844586
8	57880001	57900000	8	58020001	58040000	-0.668088
8	57860001	57880000	8	58020001	58040000	-0.64568
8	56980001	57000000	8	57140001	57160000	0.707779
8	56980001	57000000	8	57120001	57140000	0.634176
8	56720001	56740000	8	56920001	56940000	-0.735431
8	56700001	56720000	8	56960001	56980000	-0.650881
8	56700001	56720000	8	56940001	56960000	-0.680148
8	56680001	56700000	8	56980001	57000000	-0.63537
8	56680001	56700000	8	56960001	56980000	-0.680403
8	56680001	56700000	8	56940001	56960000	-0.694853
8	54520001	54540000	8	55080001	55100000	-0.781782
8	54360001	54380000	8	54800001	54820000	-0.738633
8	53860001	53880000	8	54700001	54720000	-0.60746
8	49600001	49620000	8	49900001	49920000	0.685986
8	48220001	48240000	8	48640001	48660000	-0.609046
8	41860001	41880000	8	42000001	42020000	0.688636
8	41840001	41860000	8	42000001	42020000	0.779605
8	41840001	41860000	8	41980001	42000000	0.786072
8	41560001	41580000	8	42220001	42240000	0.72574
8	41540001	41560000	8	42220001	42240000	0.812329
8	37620001	37640000	8	38220001	38240000	0.619395
8	36720001	36740000	8	37540001	37560000	0.601438
8	36700001	36720000	8	37920001	37940000	0.632216
8	36700001	36720000	8	37560001	37580000	0.640164
8	36700001	36720000	8	37540001	37560000	0.617873
8	33160001	33180000	8	33420001	33440000	-0.76092
8	29920001	29940000	8	30000001	30020000	0.823102
8	28980001	29000000	8	29160001	29180000	-0.866516
8	28740001	28760000	8	28900001	28920000	-0.724356
8	28480001	28500000	8	28640001	28660000	-0.642828
8	28460001	28480000	8	28640001	28660000	-0.730248
8	28460001	28480000	8	28620001	28640000	-0.762704
8	28260001	28280000	8	29920001	29940000	0.601884
8	28240001	28260000	8	29940001	29960000	0.611228
8	28240001	28260000	8	29920001	29940000	0.666113
8	25020001	25040000	8	26220001	26240000	-0.73013
8	25020001	25040000	8	26180001	26200000	-0.702281
8	25020001	25040000	8	26160001	26180000	-0.671823
8	25020001	25040000	8	25940001	25960000	-0.722143
8	25020001	25040000	8	25920001	25940000	-0.739437
8	25020001	25040000	8	25340001	25360000	-0.759609
8	25020001	25040000	8	25320001	25340000	-0.768523
8	22420001	22440000	8	22760001	22780000	0.676605
8	2180001	2200000	8	2340001	2360000	0.621093
8	2180001	2200000	8	2320001	2340000	0.645628
8	21780001	21800000	8	22000001	22020000	0.711897
8	21780001	21800000	8	21980001	22000000	0.605127
8	2120001	2140000	8	2320001	2340000	0.66353
8	2060001	2080000	8	2140001	2160000	0.702025
8	2040001	2060000	8	2180001	2200000	0.665974
8	2040001	2060000	8	2160001	2180000	0.73006
8	2040001	2060000	8	2140001	2160000	0.743826
8	2040001	2060000	8	2120001	2140000	0.768055
8	2020001	2040000	8	2200001	2220000	0.633943
8	2000001	2020000	8	2180001	2200000	0.684019
7	19780001	19800000	7	20340001	20360000	-0.781361
7	19220001	19240000	7	19620001	19640000	-0.761838
7	158560001	158580000	7	158640001	158660000	0.663707
7	157480001	157500000	7	157660001	157680000	0.6423
7	157440001	157460000	7	157660001	157680000	0.621863
7	157240001	157260000	7	157380001	157400000	0.697791
7	157220001	157240000	7	157380001	157400000	0.696755
7	154980001	155000000	7	155540001	155560000	-0.638591
7	151060001	151080000	7	151140001	151160000	0.813539
7	151040001	151060000	7	151140001	151160000	0.811806
7	151000001	151020000	7	151140001	151160000	0.831722
7	144460001	144480000	7	144560001	144580000	0.610598
7	138760001	138780000	7	138900001	138920000	-0.624334
7	138420001	138440000	7	138560001	138580000	0.634524
7	138120001	138140000	7	138560001	138580000	0.647543
7	138120001	138140000	7	138540001	138560000	0.678455
7	137600001	137620000	7	138120001	138140000	0.638481
7	136660001	136680000	7	136820001	136840000	-0.787769
7	135560001	135580000	7	135700001	135720000	-0.696405
7	135480001	135500000	7	135700001	135720000	-0.689552
7	135480001	135500000	7	135680001	135700000	-0.667489
7	134000001	134020000	7	135320001	135340000	0.914344
7	129700001	129720000	7	130720001	130740000	0.83082
7	129000001	129020000	7	129100001	129120000	-0.607562
7	127340001	127360000	7	127840001	127860000	-0.626757
7	12240001	12260000	7	12320001	12340000	0.632643
7	116560001	116580000	7	117820001	117840000	0.616371
7	116480001	116500000	7	117820001	117840000	0.663076
7	112580001	112600000	7	112740001	112760000	0.706946
7	112560001	112580000	7	112760001	112780000	0.797582
7	112560001	112580000	7	112740001	112760000	0.818181
7	112440001	112460000	7	112560001	112580000	0.766067
7	112420001	112440000	7	112560001	112580000	0.623335
7	112180001	112200000	7	112540001	112560000	-0.644337
7	112180001	112200000	7	112520001	112540000	-0.667785
7	112100001	112120000	7	112560001	112580000	-0.730611
7	109260001	109280000	7	109420001	109440000	0.604369
7	109220001	109240000	7	109360001	109380000	0.646339
7	108580001	108600000	7	108800001	108820000	0.879997
7	105700001	105720000	7	105780001	105800000	0.723081
7	105680001	105700000	7	105780001	105800000	0.623822
7	104600001	104620000	7	105740001	105760000	0.644556
7	1020001	1040000	7	1200001	1220000	0.76643
7	99720001	99740000	7	99800001	99820000	0.968595
7	95540001	95560000	7	96700001	96720000	-0.629526
7	95540001	95560000	7	96680001	96700000	-0.625283
7	94340001	94360000	7	94640001	94660000	-0.730282
7	87420001	87440000	7	87520001	87540000	0.767488
7	87420001	87440000	7	87500001	87520000	0.730281
7	87400001	87420000	7	87520001	87540000	0.721523
7	86680001	86700000	7	86860001	86880000	0.974054
7	86680001	86700000	7	86840001	86860000	0.907285
7	820001	840000	7	900001	920000	0.639675
7	8060001	8080000	7	8200001	8220000	-0.683428
7	80320001	80340000	7	81080001	81100000	-0.663562
7	69320001	69340000	7	69660001	69680000	0.648115
7	68800001	68820000	7	68940001	68960000	0.687392
7	68280001	68300000	7	68420001	68440000	0.680241
7	63640001	63660000	7	64060001	64080000	0.661358
7	56020001	56040000	7	56160001	56180000	0.634
7	55520001	55540000	7	55640001	55660000	0.867813
7	55500001	55520000	7	55660001	55680000	0.836321
7	55500001	55520000	7	55640001	55660000	0.845402
7	55480001	55500000	7	55660001	55680000	0.838852
7	55440001	55460000	7	55660001	55680000	0.704928
7	5520001	5540000	7	5740001	5760000	0.67291
7	5520001	5540000	7	5720001	5740000	0.656253
7	52960001	52980000	7	53360001	53380000	0.765821
7	50520001	50540000	7	50720001	50740000	-0.865446
7	50240001	50260000	7	50420001	50440000	0.606542
7	50180001	50200000	7	50700001	50720000	-0.702609
7	48720001	48740000	7	48960001	48980000	-0.717272
7	4840001	4860000	7	5220001	5240000	0.858332
7	42960001	42980000	7	43740001	43760000	0.607508
7	42960001	42980000	7	43680001	43700000	0.615098
7	42960001	42980000	7	43640001	43660000	0.604126
7	40500001	40520000	7	41180001	41200000	-0.830753
7	40260001	40280000	7	41740001	41760000	-0.615639
7	38440001	38460000	7	39540001	39560000	0.747408
7	38440001	38460000	7	38700001	38720000	-0.62967
7	38440001	38460000	7	38680001	38700000	-0.650455
7	38420001	38440000	7	39560001	39580000	0.802644
7	38420001	38440000	7	39540001	39560000	0.858042
7	38420001	38440000	7	38700001	38720000	-0.609324
7	38420001	38440000	7	38680001	38700000	-0.645594
7	38140001	38160000	7	38680001	38700000	-0.67836
7	360001	380000	7	900001	920000	0.618167
7	37260001	37280000	7	37380001	37400000	0.636609
7	37240001	37260000	7	37380001	37400000	0.705786
7	36580001	36600000	7	37200001	37220000	-0.643227
7	36540001	36560000	7	37000001	37020000	-0.685145
7	36520001	36540000	7	37220001	37240000	-0.646502
7	36520001	36540000	7	37200001	37220000	-0.634636
7	36520001	36540000	7	36700001	36720000	-0.722584
7	36520001	36540000	7	36680001	36700000	-0.758545
7	36500001	36520000	7	37220001	37240000	-0.638529
7	36480001	36500000	7	37540001	37560000	-0.625015
7	36440001	36460000	7	37360001	37380000	-0.625431
7	340001	360000	7	900001	920000	0.613844
7	33220001	33240000	7	33960001	33980000	-0.710994
7	33220001	33240000	7	33940001	33960000	-0.670005
7	33200001	33220000	7	33940001	33960000	-0.741189
7	29820001	29840000	7	30820001	30840000	-0.64763
7	29240001	29260000	7	29440001	29460000	-0.861414
7	29220001	29240000	7	29440001	29460000	-0.808142
7	29140001	29160000	7	29440001	29460000	-0.729723
7	29120001	29140000	7	29440001	29460000	-0.642291
7	27220001	27240000	7	27820001	27840000	0.680723
7	27220001	27240000	7	27800001	27820000	0.679311
7	25920001	25940000	7	26320001	26340000	0.765648
7	25920001	25940000	7	26300001	26320000	0.813382
7	25920001	25940000	7	26200001	26220000	0.920532
7	23900001	23920000	7	24700001	24720000	0.668819
7	22880001	22900000	7	23540001	23560000	0.761916
7	22140001	22160000	7	22520001	22540000	-0.71312
7	21580001	21600000	7	22040001	22060000	-0.747118
7	21560001	21580000	7	22020001	22040000	-0.706283
7	21540001	21560000	7	22040001	22060000	-0.697572
7	20200001	20220000	7	20640001	20660000	-0.809057
7	20160001	20180000	7	20580001	20600000	-0.831739
6	19940001	19960000	6	21660001	21680000	-0.629911
6	180001	200000	6	700001	720000	-0.746526
6	180001	200000	6	540001	560000	-0.703111
6	180001	200000	6	520001	540000	-0.757895
6	180001	200000	6	500001	520000	-0.800515
6	180001	200000	6	460001	480000	-0.74159
6	180001	200000	6	400001	420000	-0.786385
6	180001	200000	6	380001	400000	-0.765358
6	180001	200000	6	280001	300000	-0.634504
6	169340001	169360000	6	170820001	170840000	-0.628481
6	169300001	169320000	6	170820001	170840000	-0.617809
6	169280001	169300000	6	170840001	170860000	-0.719835
6	169280001	169300000	6	170820001	170840000	-0.637753
6	161520001	161540000	6	161780001	161800000	-0.80997
6	161500001	161520000	6	161780001	161800000	-0.782774
6	161340001	161360000	6	161780001	161800000	-0.865136
6	159580001	159600000	6	160860001	160880000	0.604832
6	158180001	158200000	6	158300001	158320000	0.62684
6	157000001	157020000	6	157080001	157100000	0.90959
6	152860001	152880000	6	152960001	152980000	-0.736342
6	152460001	152480000	6	152580001	152600000	-0.75472
6	151760001	151780000	6	153300001	153320000	0.640736
6	151720001	151740000	6	153300001	153320000	0.739893
6	151700001	151720000	6	153300001	153320000	0.666317
6	144900001	144920000	6	145520001	145540000	0.692436
6	143160001	143180000	6	143240001	143260000	0.935281
6	143120001	143140000	6	143240001	143260000	0.94912
6	143100001	143120000	6	143220001	143240000	0.926777
6	143080001	143100000	6	143260001	143280000	0.851831
6	143080001	143100000	6	143220001	143240000	0.900001
6	143080001	143100000	6	143180001	143200000	0.925206
6	143060001	143080000	6	143260001	143280000	0.806631
6	143020001	143040000	6	143280001	143300000	0.67808
6	143000001	143020000	6	143280001	143300000	0.66691
6	143000001	143020000	6	143260001	143280000	0.676311
6	139560001	139580000	6	139660001	139680000	0.731526
6	139540001	139560000	6	139660001	139680000	0.717068
6	139500001	139520000	6	139660001	139680000	0.627946
6	139440001	139460000	6	139680001	139700000	0.641999
6	139100001	139120000	6	139520001	139540000	0.600416
6	138900001	138920000	6	139680001	139700000	0.703929
6	138740001	138760000	6	139080001	139100000	0.673748
6	138420001	138440000	6	139080001	139100000	0.752882
6	138320001	138340000	6	139080001	139100000	0.876456
6	138320001	138340000	6	138420001	138440000	0.696932
6	138300001	138320000	6	138420001	138440000	0.666624
6	138020001	138040000	6	138180001	138200000	-0.641377
6	138020001	138040000	6	138120001	138140000	-0.724828
6	138020001	138040000	6	138100001	138120000	-0.683876
6	137620001	137640000	6	137940001	137960000	-0.621842
6	137600001	137620000	6	137960001	137980000	-0.608017
6	137600001	137620000	6	137940001	137960000	-0.620414
6	137400001	137420000	6	137940001	137960000	-0.60596
6	137380001	137400000	6	138320001	138340000	-0.622648
6	135460001	135480000	6	136580001	136600000	0.621956
6	134480001	134500000	6	135460001	135480000	0.867158
6	134460001	134480000	6	135520001	135540000	0.867041
6	134260001	134280000	6	135400001	135420000	0.686481
6	132980001	133000000	6	133120001	133140000	-0.905015
6	132980001	133000000	6	133100001	133120000	-0.850639
6	132980001	133000000	6	133080001	133100000	-0.879728
6	132840001	132860000	6	134240001	134260000	0.606365
6	131520001	131540000	6	131600001	131620000	0.608545
6	131500001	131520000	6	131920001	131940000	0.616693
6	130060001	130080000	6	130340001	130360000	0.68013
6	130060001	130080000	6	130320001	130340000	0.688009
6	129920001	129940000	6	130060001	130080000	0.631934
6	129800001	129820000	6	131160001	131180000	0.76619
6	129800001	129820000	6	130060001	130080000	0.691347
6	129800001	129820000	6	130040001	130060000	0.646549
6	12900001	12920000	6	13320001	13340000	-0.789684
6	127780001	127800000	6	127860001	127880000	0.804983
6	125620001	125640000	6	126180001	126200000	0.84083
6	125620001	125640000	6	126160001	126180000	0.77445
6	125620001	125640000	6	126140001	126160000	0.623595
6	122720001	122740000	6	122780001	122800000	0.711993
6	122700001	122720000	6	122780001	122800000	0.682042
6	120580001	120600000	6	121040001	121060000	-0.617445
6	119280001	119300000	6	119420001	119440000	0.834939
6	119260001	119280000	6	119420001	119440000	0.909012
6	119260001	119280000	6	119400001	119420000	0.907794
6	119120001	119140000	6	119200001	119220000	0.803133
6	118880001	118900000	6	119220001	119240000	0.638915
6	118880001	118900000	6	119200001	119220000	0.64187
6	118880001	118900000	6	119100001	119120000	0.725454
6	118860001	118880000	6	119220001	119240000	0.70138
6	116880001	116900000	6	116980001	117000000	0.724956
6	11640001	11660000	6	12880001	12900000	-0.712547
6	11640001	11660000	6	12860001	12880000	-0.743329
6	11620001	11640000	6	12880001	12900000	-0.688954
6	112500001	112520000	6	112620001	112640000	-0.74718
6	112160001	112180000	6	112320001	112340000	0.671924
6	112140001	112160000	6	112320001	112340000	0.704214
6	112120001	112140000	6	112300001	112320000	0.69588
6	112100001	112120000	6	112320001	112340000	0.657763
6	112100001	112120000	6	112300001	112320000	0.65457
6	112100001	112120000	6	112180001	112200000	0.899023
6	112060001	112080000	6	112160001	112180000	0.879848
6	112040001	112060000	6	112160001	112180000	0.92059
6	112040001	112060000	6	112120001	112140000	0.920057
6	109680001	109700000	6	109780001	109800000	0.622855
6	109240001	109260000	6	109380001	109400000	-0.649916
6	109220001	109240000	6	109380001	109400000	-0.672549
6	106780001	106800000	6	107000001	107020000	0.64262
6	106440001	106460000	6	106640001	106660000	0.616846
6	106420001	106440000	6	106540001	106560000	0.701945
6	106420001	106440000	6	106520001	106540000	0.673257
6	105920001	105940000	6	106660001	106680000	-0.741426
6	105920001	105940000	6	106540001	106560000	-0.645954
6	105900001	105920000	6	106700001	106720000	-0.664959
6	105900001	105920000	6	106680001	106700000	-0.686643
6	105900001	105920000	6	106540001	106560000	-0.659377
6	105880001	105900000	6	106740001	106760000	-0.624648
6	105880001	105900000	6	106720001	106740000	-0.619837
6	105880001	105900000	6	106700001	106720000	-0.621259
6	99940001	99960000	6	100020001	100040000	0.750827
6	97520001	97540000	6	97820001	97840000	-0.622446
6	96960001	96980000	6	97360001	97380000	0.60966
6	96020001	96040000	6	96960001	96980000	-0.707827
6	91000001	91020000	6	91100001	91120000	0.833428
6	90980001	91000000	6	91100001	91120000	0.826973
6	90920001	90940000	6	90980001	91000000	0.82036
6	90900001	90920000	6	90980001	91000000	0.831635
6	90660001	90680000	6	91000001	91020000	0.743862
6	90660001	90680000	6	90980001	91000000	0.771087
6	90660001	90680000	6	90900001	90920000	0.854788
6	90660001	90680000	6	90880001	90900000	0.864167
6	90640001	90660000	6	91000001	91020000	0.737295
6	90640001	90660000	6	90980001	91000000	0.759012
6	88020001	88040000	6	88180001	88200000	0.803955
6	87840001	87860000	6	88300001	88320000	0.604025
6	86320001	86340000	6	86380001	86400000	0.61758
6	82980001	83000000	6	83740001	83760000	-0.682018
6	82960001	82980000	6	83760001	83780000	-0.683673
6	82960001	82980000	6	83740001	83760000	-0.701597
6	82940001	82960000	6	83880001	83900000	-0.631907
6	82920001	82940000	6	83880001	83900000	-0.645392
6	8080001	8100000	6	8420001	8440000	0.762757
6	8060001	8080000	6	8440001	8460000	0.797265
6	8060001	8080000	6	8420001	8440000	0.699359
6	79780001	79800000	6	79940001	79960000	0.627693
6	74220001	74240000	6	75960001	75980000	0.603494
6	74200001	74220000	6	75960001	75980000	0.604715
6	74200001	74220000	6	75940001	75960000	0.647299
6	55020001	55040000	6	55780001	55800000	0.822643
6	53040001	53060000	6	53140001	53160000	0.711267
6	52260001	52280000	6	52920001	52940000	0.602672
6	52140001	52160000	6	52920001	52940000	0.605856
6	46180001	46200000	6	46360001	46380000	-0.919197
6	46060001	46080000	6	46360001	46380000	-0.884335
6	46040001	46060000	6	46380001	46400000	-0.890428
6	46040001	46060000	6	46360001	46380000	-0.873465
6	45920001	45940000	6	46360001	46380000	-0.863344
6	45900001	45920000	6	46360001	46380000	-0.848005
6	44440001	44460000	6	46360001	46380000	-0.714411
6	42600001	42620000	6	43120001	43140000	0.65005
6	42600001	42620000	6	43100001	43120000	0.602994
6	42580001	42600000	6	43120001	43140000	0.652931
6	41900001	41920000	6	42000001	42020000	0.63338
6	41900001	41920000	6	41980001	42000000	0.654474
6	36720001	36740000	6	36980001	37000000	0.660625
6	36720001	36740000	6	36960001	36980000	0.61722
6	35960001	35980000	6	36320001	36340000	-0.60991
6	35540001	35560000	6	35620001	35640000	0.616448
6	35280001	35300000	6	35560001	35580000	0.860655
6	35280001	35300000	6	35420001	35440000	0.692798
6	35260001	35280000	6	35660001	35680000	0.655265
6	35260001	35280000	6	35600001	35620000	0.889967
6	35260001	35280000	6	35580001	35600000	0.884218
6	35260001	35280000	6	35560001	35580000	0.858711
6	35260001	35280000	6	35540001	35560000	0.912005
6	35260001	35280000	6	35520001	35540000	0.857891
6	35260001	35280000	6	35420001	35440000	0.69014
6	35240001	35260000	6	35520001	35540000	0.840462
6	34160001	34180000	6	34560001	34580000	0.608221
6	34140001	34160000	6	34580001	34600000	0.724287
6	34140001	34160000	6	34560001	34580000	0.675817
6	34140001	34160000	6	34360001	34380000	0.632982
6	33560001	33580000	6	33660001	33680000	0.872982
6	33540001	33560000	6	33660001	33680000	0.87605
6	33440001	33460000	6	34100001	34120000	0.945027
6	33440001	33460000	6	33960001	33980000	0.787114
6	33400001	33420000	6	33540001	33560000	0.683243
6	33400001	33420000	6	33520001	33540000	0.710715
6	33380001	33400000	6	33540001	33560000	0.627551
6	33380001	33400000	6	33520001	33540000	0.717164
6	3140001	3160000	6	3720001	3740000	0.881291
6	3120001	3140000	6	3720001	3740000	0.860975
6	30780001	30800000	6	31040001	31060000	0.818548
6	30760001	30780000	6	31040001	31060000	0.855664
6	30740001	30760000	6	31040001	31060000	0.88843
6	30700001	30720000	6	31040001	31060000	0.911605
6	30620001	30640000	6	31040001	31060000	0.891531
6	30460001	30480000	6	31220001	31240000	0.643697
6	30440001	30460000	6	30700001	30720000	0.703557
6	30440001	30460000	6	30680001	30700000	0.752341
6	30440001	30460000	6	30560001	30580000	0.895971
6	30440001	30460000	6	30540001	30560000	0.833787
6	2980001	3000000	6	3240001	3260000	0.785188
6	2880001	2900000	6	4020001	4040000	0.667197
6	28820001	28840000	6	28900001	28920000	0.620585
6	28800001	28820000	6	28980001	29000000	0.751526
6	28800001	28820000	6	28960001	28980000	0.728038
6	28800001	28820000	6	28940001	28960000	0.694615
6	28800001	28820000	6	28900001	28920000	0.647735
6	27760001	27780000	6	27840001	27860000	0.630582
6	2760001	2780000	6	4000001	4020000	0.719109
6	2740001	2760000	6	4000001	4020000	0.704983
6	26340001	26360000	6	26560001	26580000	0.819027
6	26320001	26340000	6	26560001	26580000	0.884466
6	26320001	26340000	6	26540001	26560000	0.895178
6	26180001	26200000	6	26560001	26580000	0.92651
6	26180001	26200000	6	26280001	26300000	0.910643
6	26040001	26060000	6	26140001	26160000	0.879481
6	24920001	24940000	6	25000001	25020000	0.83203
6	24920001	24940000	6	24980001	25000000	0.845722
6	24900001	24920000	6	25000001	25020000	0.844857
6	24900001	24920000	6	24980001	25000000	0.863684
6	24880001	24900000	6	25000001	25020000	0.833757
6	24860001	24880000	6	25000001	25020000	0.813284
6	24840001	24860000	6	25000001	25020000	0.802866
6	22600001	22620000	6	23060001	23080000	-0.675552
6	20080001	20100000	6	20500001	20520000	-0.676489
5	180280001	180300000	5	180560001	180580000	0.627366
5	180240001	180260000	5	180580001	180600000	0.636247
5	180200001	180220000	5	180280001	180300000	0.790645
5	179220001	179240000	5	179500001	179520000	0.878143
5	179220001	179240000	5	179320001	179340000	0.883475
5	179200001	179220000	5	179500001	179520000	0.855382
5	179200001	179220000	5	179320001	179340000	0.905572
5	179120001	179140000	5	179500001	179520000	0.652107
5	179080001	179100000	5	179500001	179520000	0.687925
5	179060001	179080000	5	179500001	179520000	0.73264
5	178940001	178960000	5	179500001	179520000	0.737248
5	178580001	178600000	5	179060001	179080000	0.837826
5	178280001	178300000	5	178460001	178480000	0.660836
5	178140001	178160000	5	178280001	178300000	0.850065
5	177020001	177040000	5	177580001	177600000	0.787105
5	176800001	176820000	5	176920001	176940000	0.781912
5	176800001	176820000	5	176900001	176920000	0.770668
5	176780001	176800000	5	176920001	176940000	0.727209
5	176780001	176800000	5	176900001	176920000	0.703864
5	176760001	176780000	5	176900001	176920000	0.647501
5	171340001	171360000	5	171460001	171480000	-0.792342
5	171320001	171340000	5	171460001	171480000	-0.740893
5	170820001	170840000	5	172120001	172140000	0.721143
5	170800001	170820000	5	172120001	172140000	0.698106
5	168000001	168020000	5	169080001	169100000	0.630542
5	168000001	168020000	5	169000001	169020000	0.705277
5	167900001	167920000	5	169000001	169020000	0.617107
5	162860001	162880000	5	162940001	162960000	0.748165
5	159440001	159460000	5	159540001	159560000	0.70627
5	159420001	159440000	5	159540001	159560000	0.796838
5	157500001	157520000	5	158560001	158580000	0.615849
5	156660001	156680000	5	156740001	156760000	0.93543
5	156660001	156680000	5	156720001	156740000	0.927247
5	156640001	156660000	5	156720001	156740000	0.914923
5	156620001	156640000	5	157160001	157180000	0.715911
5	156600001	156620000	5	157160001	157180000	0.691628
5	156600001	156620000	5	156700001	156720000	0.889569
5	156580001	156600000	5	157160001	157180000	0.767986
5	156580001	156600000	5	157140001	157160000	0.802883
5	156580001	156600000	5	156720001	156740000	0.888074
5	156580001	156600000	5	156700001	156720000	0.881955
5	156580001	156600000	5	156680001	156700000	0.878285
5	156580001	156600000	5	156660001	156680000	0.863981
5	156560001	156580000	5	157160001	157180000	0.75527
5	156560001	156580000	5	157140001	157160000	0.749059
5	156340001	156360000	5	156540001	156560000	-0.749576
5	155360001	155380000	5	156540001	156560000	-0.829989
5	155360001	155380000	5	156520001	156540000	-0.77335
5	153820001	153840000	5	154320001	154340000	0.607693
5	150060001	150080000	5	150220001	150240000	0.672308
5	150060001	150080000	5	150200001	150220000	0.724036
5	149880001	149900000	5	150340001	150360000	0.637217
5	149840001	149860000	5	150480001	150500000	0.701627
5	149840001	149860000	5	150220001	150240000	0.659064
5	149840001	149860000	5	150200001	150220000	0.606016
5	149820001	149840000	5	150480001	150500000	0.699492
5	149820001	149840000	5	150220001	150240000	0.684694
5	149800001	149820000	5	151140001	151160000	0.754672
5	149800001	149820000	5	150580001	150600000	0.743219
5	148740001	148760000	5	149360001	149380000	0.711719
5	148720001	148740000	5	149360001	149380000	0.744218
5	148700001	148720000	5	149340001	149360000	0.671972
5	14860001	14880000	5	15000001	15020000	0.716302
5	14860001	14880000	5	14980001	15000000	0.678139
5	148220001	148240000	5	148320001	148340000	-0.707944
5	148120001	148140000	5	148380001	148400000	-0.62894
5	148120001	148140000	5	148340001	148360000	-0.644749
5	148100001	148120000	5	148400001	148420000	-0.639321
5	148100001	148120000	5	148380001	148400000	-0.619334
5	148100001	148120000	5	148360001	148380000	-0.626428
5	147820001	147840000	5	148400001	148420000	-0.774882
5	146040001	146060000	5	146340001	146360000	-0.600563
5	146040001	146060000	5	146320001	146340000	-0.647318
5	146040001	146060000	5	146220001	146240000	-0.719855
5	146020001	146040000	5	146320001	146340000	-0.641675
5	145920001	145940000	5	146560001	146580000	-0.757557
5	145900001	145920000	5	146560001	146580000	-0.766331
5	145060001	145080000	5	145200001	145220000	-0.783157
5	142760001	142780000	5	143200001	143220000	-0.760123
5	142380001	142400000	5	142800001	142820000	-0.633476
5	142380001	142400000	5	142780001	142800000	-0.670824
5	142380001	142400000	5	142740001	142760000	-0.642585
5	142120001	142140000	5	142240001	142260000	-0.725507
5	142100001	142120000	5	142240001	142260000	-0.732703
5	141360001	141380000	5	142080001	142100000	0.642183
5	141360001	141380000	5	141920001	141940000	0.635368
5	141060001	141080000	5	142080001	142100000	0.609296
5	141040001	141060000	5	142080001	142100000	0.622919
5	135240001	135260000	5	135540001	135560000	-0.653802
5	135220001	135240000	5	135540001	135560000	-0.688615
5	135220001	135240000	5	135520001	135540000	-0.659274
5	135200001	135220000	5	135540001	135560000	-0.734358
5	135200001	135220000	5	135400001	135420000	-0.660736
5	133500001	133520000	5	133700001	133720000	0.670082
5	133500001	133520000	5	133620001	133640000	0.691731
5	133380001	133400000	5	133460001	133480000	0.868968
5	133360001	133380000	5	133600001	133620000	0.784519
5	133360001	133380000	5	133460001	133480000	0.860632
5	133340001	133360000	5	133920001	133940000	0.711533
5	132420001	132440000	5	133280001	133300000	0.770539
5	131880001	131900000	5	132040001	132060000	-0.618929
5	131860001	131880000	5	132040001	132060000	-0.604186
5	131740001	131760000	5	131820001	131840000	0.841241
5	131720001	131740000	5	131820001	131840000	0.844194
5	130600001	130620000	5	130700001	130720000	0.744567
5	130560001	130580000	5	130700001	130720000	0.704779
5	130540001	130560000	5	130700001	130720000	0.664446
5	130500001	130520000	5	130580001	130600000	0.703017
5	128380001	128400000	5	128480001	128500000	0.814967
5	125680001	125700000	5	126120001	126140000	0.747266
5	122080001	122100000	5	122160001	122180000	0.723834
5	120560001	120580000	5	121120001	121140000	-0.712961
5	118640001	118660000	5	118720001	118740000	0.798817
5	118620001	118640000	5	118720001	118740000	0.758093
5	118600001	118620000	5	118720001	118740000	0.661983
5	118600001	118620000	5	118700001	118720000	0.621718
5	118600001	118620000	5	118680001	118700000	0.625828
5	114440001	114460000	5	114560001	114580000	-0.688977
5	112680001	112700000	5	112820001	112840000	0.672954
5	112660001	112680000	5	112840001	112860000	0.687937
5	112320001	112340000	5	112660001	112680000	0.626772
5	112320001	112340000	5	112640001	112660000	0.620079
5	111880001	111900000	5	112100001	112120000	-0.605426
5	109020001	109040000	5	110060001	110080000	0.86483
5	108660001	108680000	5	108760001	108780000	0.790237
5	108660001	108680000	5	108740001	108760000	0.73386
5	108080001	108100000	5	108740001	108760000	0.657008
5	108060001	108080000	5	108740001	108760000	0.600569
5	102560001	102580000	5	102800001	102820000	-0.732649
5	101920001	101940000	5	102360001	102380000	-0.879506
5	101900001	101920000	5	102480001	102500000	-0.706332
5	101900001	101920000	5	102460001	102480000	-0.682723
5	101880001	101900000	5	102520001	102540000	-0.703015
5	101880001	101900000	5	102480001	102500000	-0.688954
5	101860001	101880000	5	102460001	102480000	-0.729758
5	96300001	96320000	5	96480001	96500000	0.612059
5	95160001	95180000	5	95960001	95980000	-0.733774
5	94880001	94900000	5	94960001	94980000	0.686185
5	93860001	93880000	5	94040001	94060000	-0.730095
5	93860001	93880000	5	94020001	94040000	-0.669171
5	93840001	93860000	5	94060001	94080000	-0.775531
5	93840001	93860000	5	94040001	94060000	-0.743755
5	93840001	93860000	5	94020001	94040000	-0.693417
5	89740001	89760000	5	89820001	89840000	0.656045
5	89700001	89720000	5	89820001	89840000	0.758967
5	87440001	87460000	5	87960001	87980000	-0.746753
5	87420001	87440000	5	87960001	87980000	-0.764253
5	87080001	87100000	5	87980001	88000000	-0.730801
5	87060001	87080000	5	88020001	88040000	-0.794393
5	87060001	87080000	5	87980001	88000000	-0.743569
5	87060001	87080000	5	87960001	87980000	-0.768211
5	85900001	85920000	5	86720001	86740000	0.625868
5	85900001	85920000	5	86700001	86720000	0.661547
5	85900001	85920000	5	86680001	86700000	0.771482
5	81460001	81480000	5	82860001	82880000	0.696038
5	79460001	79480000	5	79540001	79560000	0.67741
5	79420001	79440000	5	79560001	79580000	0.604834
5	79420001	79440000	5	79540001	79560000	0.650658
5	79420001	79440000	5	79520001	79540000	0.722776
5	79420001	79440000	5	79480001	79500000	0.813218
5	79400001	79420000	5	79500001	79520000	0.769212
5	79400001	79420000	5	79480001	79500000	0.798297
5	78840001	78860000	5	79140001	79160000	-0.626305
5	76780001	76800000	5	77660001	77680000	-0.843285
5	75900001	75920000	5	76060001	76080000	-0.689551
5	75880001	75900000	5	76080001	76100000	-0.697393
5	75880001	75900000	5	76060001	76080000	-0.687003
5	73680001	73700000	5	73940001	73960000	-0.876167
5	73200001	73220000	5	73820001	73840000	-0.61894
5	72880001	72900000	5	73920001	73940000	-0.601523
5	72880001	72900000	5	73080001	73100000	-0.685791
5	72880001	72900000	5	73060001	73080000	-0.696854
5	71420001	71440000	5	71600001	71620000	-0.647596
5	71420001	71440000	5	71580001	71600000	-0.65295
5	71420001	71440000	5	71560001	71580000	-0.689969
5	66440001	66460000	5	67540001	67560000	0.60739
5	66280001	66300000	5	67540001	67560000	0.696223
5	66280001	66300000	5	67520001	67540000	0.708592
5	61740001	61760000	5	62060001	62080000	-0.69922
5	59980001	60000000	5	60220001	60240000	-0.64933
5	59960001	59980000	5	60940001	60960000	-0.669184
5	59960001	59980000	5	60920001	60940000	-0.64975
5	59100001	59120000	5	59940001	59960000	-0.634858
5	56460001	56480000	5	57740001	57760000	0.611584
5	55280001	55300000	5	55360001	55380000	0.609382
5	55240001	55260000	5	56520001	56540000	0.628715
5	55240001	55260000	5	56500001	56520000	0.628312
5	55240001	55260000	5	56480001	56500000	0.64409
5	55240001	55260000	5	56140001	56160000	0.629397
5	54660001	54680000	5	56060001	56080000	0.908694
5	5420001	5440000	5	5500001	5520000	0.728402
5	5400001	5420000	5	5520001	5540000	0.753488
5	5400001	5420000	5	5500001	5520000	0.722287
5	42940001	42960000	5	43060001	43080000	0.655948
5	42940001	42960000	5	43040001	43060000	0.627216
5	42920001	42940000	5	43060001	43080000	0.724138
5	42920001	42940000	5	43040001	43060000	0.706123
5	42900001	42920000	5	43000001	43020000	0.666384
5	40740001	40760000	5	40840001	40860000	0.748097
5	39940001	39960000	5	40860001	40880000	-0.623965
5	39720001	39740000	5	40880001	40900000	-0.660335
5	39720001	39740000	5	40860001	40880000	-0.695247
5	39700001	39720000	5	40880001	40900000	-0.736014
5	39300001	39320000	5	39540001	39560000	-0.606823
5	39200001	39220000	5	39280001	39300000	-0.691923
5	38440001	38460000	5	39100001	39120000	0.655814
5	38420001	38440000	5	39320001	39340000	0.712499
5	38420001	38440000	5	39080001	39100000	0.645629
5	35440001	35460000	5	35920001	35940000	-0.664971
4	185340001	185360000	4	185440001	185460000	-0.677652
4	185200001	185220000	4	185340001	185360000	-0.771915
4	185180001	185200000	4	185380001	185400000	-0.647001
4	183840001	183860000	4	184340001	184360000	0.79913
4	183840001	183860000	4	184320001	184340000	0.69134
4	183820001	183840000	4	184400001	184420000	0.775687
4	183820001	183840000	4	184340001	184360000	0.763464
4	183820001	183840000	4	184320001	184340000	0.686131
4	183400001	183420000	4	183700001	183720000	-0.74009
4	178220001	178240000	4	178360001	178380000	-0.631859
4	178220001	178240000	4	178340001	178360000	-0.706215
4	178200001	178220000	4	178360001	178380000	-0.646706
4	178160001	178180000	4	178260001	178280000	-0.714426
4	177240001	177260000	4	178220001	178240000	0.620436
4	176760001	176780000	4	177380001	177400000	-0.635719
4	1740001	1760000	4	1900001	1920000	0.64142
4	174240001	174260000	4	174320001	174340000	-0.650319
4	17360001	17380000	4	18580001	18600000	-0.618547
4	1720001	1740000	4	1880001	1900000	0.835137
4	1700001	1720000	4	1880001	1900000	0.828351
4	170620001	170640000	4	170940001	170960000	0.788232
4	170540001	170560000	4	170940001	170960000	0.675967
4	170520001	170540000	4	170960001	170980000	0.723447
4	170520001	170540000	4	170940001	170960000	0.651882
4	169820001	169840000	4	170700001	170720000	0.745446
4	158520001	158540000	4	158660001	158680000	-0.61877
4	153420001	153440000	4	153560001	153580000	-0.765548
4	153400001	153420000	4	153560001	153580000	-0.734202
4	151220001	151240000	4	151780001	151800000	-0.710953
4	151220001	151240000	4	151760001	151780000	-0.696597
4	151200001	151220000	4	151780001	151800000	-0.707892
4	151200001	151220000	4	151760001	151780000	-0.683729
4	150900001	150920000	4	151780001	151800000	-0.644513
4	148620001	148640000	4	148780001	148800000	-0.788972
4	148620001	148640000	4	148760001	148780000	-0.745628
4	148520001	148540000	4	148780001	148800000	-0.610492
4	139980001	140000000	4	141440001	141460000	0.726307
4	139920001	139940000	4	141440001	141460000	0.630171
4	13480001	13500000	4	13620001	13640000	0.769736
4	1340001	1360000	4	1620001	1640000	0.681376
4	13460001	13480000	4	13620001	13640000	0.789518
4	129780001	129800000	4	130000001	130020000	-0.635277
4	128960001	128980000	4	129200001	129220000	0.717379
4	1240001	1260000	4	1320001	1340000	0.63636
4	123660001	123680000	4	123840001	123860000	-0.665725
4	123520001	123540000	4	123840001	123860000	-0.607233
4	123120001	123140000	4	123840001	123860000	-0.601564
4	122860001	122880000	4	123500001	123520000	-0.721875
4	122840001	122860000	4	123480001	123500000	-0.837688
4	122820001	122840000	4	123500001	123520000	-0.831969
4	122820001	122840000	4	123480001	123500000	-0.797413
4	122800001	122820000	4	123640001	123660000	-0.736618
4	122800001	122820000	4	123500001	123520000	-0.774345
4	122800001	122820000	4	123480001	123500000	-0.823038
4	122780001	122800000	4	123840001	123860000	-0.609686
4	122380001	122400000	4	122640001	122660000	-0.605687
4	122080001	122100000	4	122160001	122180000	-0.684481
4	122020001	122040000	4	122180001	122200000	-0.650264
4	120980001	121000000	4	122100001	122120000	0.674297
4	119680001	119700000	4	119800001	119820000	-0.64708
4	116140001	116160000	4	116320001	116340000	-0.748865
4	114320001	114340000	4	115600001	115620000	0.682165
4	114320001	114340000	4	115580001	115600000	0.646041
4	114320001	114340000	4	115000001	115020000	-0.672407
4	114320001	114340000	4	114980001	115000000	-0.676562
4	114300001	114320000	4	115600001	115620000	0.702799
4	114300001	114320000	4	115580001	115600000	0.661614
4	114300001	114320000	4	114980001	115000000	-0.64703
4	113220001	113240000	4	113420001	113440000	0.691883
4	113180001	113200000	4	113440001	113460000	0.776938
4	113180001	113200000	4	113420001	113440000	0.903177
4	113160001	113180000	4	113440001	113460000	0.846627
4	113140001	113160000	4	113440001	113460000	0.899906
4	113140001	113160000	4	113420001	113440000	0.9543
4	113140001	113160000	4	113220001	113240000	0.745761
4	113020001	113040000	4	113440001	113460000	0.738244
4	113000001	113020000	4	113520001	113540000	0.635137
4	113000001	113020000	4	113440001	113460000	0.701425
4	113000001	113020000	4	113420001	113440000	0.707702
4	1100001	1120000	4	1500001	1520000	0.779641
4	108980001	109000000	4	109060001	109080000	0.930358
4	108960001	108980000	4	109060001	109080000	0.909777
4	102120001	102140000	4	102240001	102260000	-0.704307
4	102100001	102120000	4	102240001	102260000	-0.686422
4	95320001	95340000	4	95500001	95520000	-0.670787
4	95300001	95320000	4	95500001	95520000	-0.640454
4	95220001	95240000	4	95500001	95520000	-0.603849
4	95220001	95240000	4	95320001	95340000	-0.66695
4	90160001	90180000	4	90220001	90240000	0.638533
4	89740001	89760000	4	89940001	89960000	0.644549
4	89740001	89760000	4	89920001	89940000	0.635464
4	89720001	89740000	4	89940001	89960000	0.645968
4	89580001	89600000	4	89940001	89960000	0.687937
4	89340001	89360000	4	89940001	89960000	0.610664
4	80840001	80860000	4	81120001	81140000	-0.737638
4	80820001	80840000	4	81120001	81140000	-0.78973
4	78660001	78680000	4	78800001	78820000	-0.632781
4	78660001	78680000	4	78780001	78800000	-0.616154
4	78580001	78600000	4	79020001	79040000	-0.62521
4	77100001	77120000	4	77300001	77320000	-0.741332
4	77080001	77100000	4	77280001	77300000	-0.687516
4	76880001	76900000	4	78700001	78720000	0.724943
4	75080001	75100000	4	75600001	75620000	0.658229
4	6980001	7000000	4	7060001	7080000	0.830688
4	56280001	56300000	4	56720001	56740000	0.601269
4	52960001	52980000	4	53080001	53100000	0.617126
4	5220001	5240000	4	5740001	5760000	0.699839
4	48040001	48060000	4	48140001	48160000	0.639358
4	44640001	44660000	4	44740001	44760000	0.625629
4	40220001	40240000	4	40300001	40320000	0.809374
4	40180001	40200000	4	40300001	40320000	0.621638
4	36080001	36100000	4	36400001	36420000	-0.63761
4	340001	360000	4	480001	500000	0.60269
4	2240001	2260000	4	2440001	2460000	0.610915
4	2240001	2260000	4	2420001	2440000	0.626584
3	196320001	196340000	3	196400001	196420000	0.905433
3	195260001	195280000	3	195580001	195600000	0.676272
3	192260001	192280000	3	192760001	192780000	0.651031
3	191380001	191400000	3	191800001	191820000	-0.602681
3	190720001	190740000	3	191280001	191300000	-0.843889
3	190580001	190600000	3	190720001	190740000	0.850072
3	189000001	189020000	3	189080001	189100000	0.721198
3	185980001	186000000	3	186240001	186260000	-0.616764
3	185700001	185720000	3	186060001	186080000	-0.727341
3	185680001	185700000	3	185960001	185980000	-0.60605
3	185640001	185660000	3	186760001	186780000	0.603588
3	185640001	185660000	3	186740001	186760000	0.675286
3	185640001	185660000	3	186620001	186640000	0.663489
3	185280001	185300000	3	185620001	185640000	0.64827
3	185060001	185080000	3	185280001	185300000	-0.625021
3	184060001	184080000	3	184500001	184520000	0.60562
3	184040001	184060000	3	184500001	184520000	0.76801
3	182420001	182440000	3	183100001	183120000	-0.751737
3	182420001	182440000	3	182560001	182580000	-0.65321
3	180320001	180340000	3	180660001	180680000	0.698232
3	180320001	180340000	3	180640001	180660000	0.620586
3	178740001	178760000	3	178840001	178860000	0.718417
3	178720001	178740000	3	178840001	178860000	0.778539
3	178720001	178740000	3	178820001	178840000	0.75305
3	170660001	170680000	3	171500001	171520000	-0.618641
3	169480001	169500000	3	169680001	169700000	0.718535
3	16860001	16880000	3	17260001	17280000	-0.615476
3	16840001	16860000	3	17260001	17280000	-0.676498
3	160420001	160440000	3	160660001	160680000	-0.637234
3	160420001	160440000	3	160640001	160660000	-0.686175
3	160400001	160420000	3	160660001	160680000	-0.628453
3	160400001	160420000	3	160640001	160660000	-0.65872
3	157320001	157340000	3	158240001	158260000	-0.756703
3	157320001	157340000	3	158040001	158060000	-0.763811
3	15660001	15680000	3	16280001	16300000	0.671158
3	152640001	152660000	3	153700001	153720000	-0.643743
3	151920001	151940000	3	152140001	152160000	0.911814
3	151920001	151940000	3	152100001	152120000	0.902538
3	151920001	151940000	3	152000001	152020000	0.852557
3	151900001	151920000	3	152160001	152180000	0.851264
3	151900001	151920000	3	152140001	152160000	0.889128
3	151900001	151920000	3	152000001	152020000	0.805889
3	151900001	151920000	3	151980001	152000000	0.839711
3	151880001	151900000	3	152160001	152180000	0.789371
3	151880001	151900000	3	152140001	152160000	0.842805
3	150900001	150920000	3	152180001	152200000	0.776445
3	148700001	148720000	3	148800001	148820000	-0.785732
3	148680001	148700000	3	148980001	149000000	-0.877703
3	148660001	148680000	3	148980001	149000000	-0.884743
3	148560001	148580000	3	149040001	149060000	-0.848375
3	146180001	146200000	3	146260001	146280000	0.679556
3	142720001	142740000	3	143680001	143700000	0.747566
3	142700001	142720000	3	143680001	143700000	0.705179
3	141840001	141860000	3	142000001	142020000	-0.683247
3	141840001	141860000	3	141980001	142000000	-0.72745
3	141680001	141700000	3	142000001	142020000	-0.603854
3	141660001	141680000	3	142000001	142020000	-0.600199
3	13940001	13960000	3	14480001	14500000	0.654505
3	13920001	13940000	3	14480001	14500000	0.756002
3	138820001	138840000	3	139040001	139060000	-0.669441
3	137880001	137900000	3	138640001	138660000	0.624158
3	13700001	13720000	3	13920001	13940000	0.721461
3	13700001	13720000	3	13900001	13920000	0.714675
3	13680001	13700000	3	13920001	13940000	0.665121
3	13680001	13700000	3	13900001	13920000	0.653451
3	136580001	136600000	3	136660001	136680000	-0.717474
3	136320001	136340000	3	136440001	136460000	-0.769501
3	13540001	13560000	3	13680001	13700000	0.68888
3	13520001	13540000	3	13920001	13940000	0.845501
3	13520001	13540000	3	13900001	13920000	0.861386
3	13520001	13540000	3	13680001	13700000	0.698951
3	13380001	13400000	3	13480001	13500000	0.745233
3	133140001	133160000	3	133520001	133540000	0.604529
3	132460001	132480000	3	133640001	133660000	0.612415
3	132440001	132460000	3	133640001	133660000	0.606351
3	132120001	132140000	3	133520001	133540000	0.655637
3	13180001	13200000	3	14100001	14120000	0.800996
3	131040001	131060000	3	131400001	131420000	-0.611136
3	129200001	129220000	3	129540001	129560000	-0.691975
3	128400001	128420000	3	128500001	128520000	0.600267
3	128380001	128400000	3	128540001	128560000	0.691829
3	128380001	128400000	3	128520001	128540000	0.684115
3	128380001	128400000	3	128500001	128520000	0.669961
3	128360001	128380000	3	128540001	128560000	0.730786
3	128340001	128360000	3	128560001	128580000	0.756186
3	121820001	121840000	3	122040001	122060000	-0.772987
3	121820001	121840000	3	122020001	122040000	-0.770537
3	121820001	121840000	3	122000001	122020000	-0.735615
3	121800001	121820000	3	122000001	122020000	-0.687265
3	121280001	121300000	3	121740001	121760000	-0.634692
3	120320001	120340000	3	120440001	120460000	0.65183
3	120300001	120320000	3	120440001	120460000	0.615912
3	119220001	119240000	3	120280001	120300000	0.836301
3	119180001	119200000	3	120060001	120080000	0.785289
3	114780001	114800000	3	114880001	114900000	0.615164
3	113940001	113960000	3	115500001	115520000	0.661678
3	113920001	113940000	3	115500001	115520000	0.663039
3	11260001	11280000	3	11380001	11400000	-0.695794
3	11260001	11280000	3	11360001	11380000	-0.623555
3	111840001	111860000	3	112240001	112260000	0.62231
3	111820001	111840000	3	112240001	112260000	0.680234
3	110380001	110400000	3	110560001	110580000	0.625643
3	109720001	109740000	3	110000001	110020000	0.726229
3	108520001	108540000	3	108600001	108620000	0.642816
3	107380001	107400000	3	107440001	107460000	0.621918
3	106960001	106980000	3	107160001	107180000	0.640298
3	106960001	106980000	3	107140001	107160000	0.706634
3	106960001	106980000	3	107120001	107140000	0.705308
3	101520001	101540000	3	102240001	102260000	0.729845
3	101500001	101520000	3	102240001	102260000	0.746215
3	101400001	101420000	3	102240001	102260000	0.74757
3	101280001	101300000	3	101380001	101400000	0.764722
3	99560001	99580000	3	100300001	100320000	-0.668294
3	99560001	99580000	3	99780001	99800000	-0.693136
3	98560001	98580000	3	99300001	99320000	0.615647
3	88060001	88080000	3	88180001	88200000	-0.638803
3	87400001	87420000	3	88040001	88060000	-0.700446
3	87380001	87400000	3	88040001	88060000	-0.704002
3	87340001	87360000	3	88020001	88040000	-0.655137
3	8340001	8360000	3	8460001	8480000	-0.660358
3	8340001	8360000	3	8440001	8460000	-0.699203
3	81720001	81740000	3	82160001	82180000	-0.667547
3	81520001	81540000	3	82180001	82200000	-0.663407
3	71460001	71480000	3	71540001	71560000	0.733097
3	71440001	71460000	3	71540001	71560000	0.679329
3	71420001	71440000	3	71540001	71560000	0.649111
3	71420001	71440000	3	71520001	71540000	0.715981
3	71060001	71080000	3	71540001	71560000	0.618314
3	71040001	71060000	3	71540001	71560000	0.677941
3	71040001	71060000	3	71120001	71140000	0.708305
3	69360001	69380000	3	69440001	69460000	-0.804062
3	69200001	69220000	3	69460001	69480000	-0.732763
3	69200001	69220000	3	69340001	69360000	-0.791363
3	69180001	69200000	3	69460001	69480000	-0.713797
3	65080001	65100000	3	65480001	65500000	-0.634271
3	6380001	6400000	3	6980001	7000000	-0.656634
23	19600001	19620000	23	19900001	19920000	-0.744038
23	17800001	17820000	23	19340001	19360000	0.88745
23	17760001	17780000	23	19360001	19380000	0.680245
23	17760001	17780000	23	19340001	19360000	0.770938
23	17760001	17780000	23	18400001	18420000	0.756922
23	17760001	17780000	23	18380001	18400000	0.77295
23	17740001	17760000	23	19340001	19360000	0.720062
3	57400001	57420000	3	57840001	57860000	-0.702248
3	57400001	57420000	3	57820001	57840000	-0.699475
23	16720001	16740000	23	16800001	16820000	0.763291
23	15840001	15860000	23	16720001	16740000	0.686652
23	15840001	15860000	23	16700001	16720000	0.667306
23	15820001	15840000	23	16720001	16740000	0.727613
23	15780001	15800000	23	16720001	16740000	0.77015
23	15780001	15800000	23	16700001	16720000	0.758727
23	15700001	15720000	23	16720001	16740000	0.735698
23	15700001	15720000	23	15820001	15840000	0.665761
23	15700001	15720000	23	15800001	15820000	0.657371
23	15700001	15720000	23	15780001	15800000	0.646833
23	15700001	15720000	23	15760001	15780000	0.643784
23	15680001	15700000	23	16720001	16740000	0.662788
23	15680001	15700000	23	16700001	16720000	0.631511
23	15680001	15700000	23	15840001	15860000	0.621276
23	15680001	15700000	23	15780001	15800000	0.67678
23	15680001	15700000	23	15760001	15780000	0.640796
23	150500001	150520000	23	150720001	150740000	-0.64179
23	14980001	15000000	23	15240001	15260000	0.630606
23	13760001	13780000	23	14040001	14060000	0.73376
23	13760001	13780000	23	14020001	14040000	0.737657
23	13740001	13760000	23	14040001	14060000	0.724334
23	135820001	135840000	23	135960001	135980000	-0.615
23	135640001	135660000	23	135980001	136000000	-0.687052
23	135580001	135600000	23	135980001	136000000	-0.832574
23	133600001	133620000	23	134040001	134060000	-0.735096
23	12980001	13000000	23	13100001	13120000	0.610866
23	12980001	13000000	23	13080001	13100000	0.619106
23	129220001	129240000	23	129300001	129320000	-0.679354
23	129200001	129220000	23	129320001	129340000	-0.767079
23	129200001	129220000	23	129300001	129320000	-0.668796
23	128740001	128760000	23	129300001	129320000	-0.624006
23	128720001	128740000	23	129340001	129360000	-0.604521
23	117560001	117580000	23	117780001	117800000	-0.689422
23	117560001	117580000	23	117760001	117780000	-0.704134
23	11560001	11580000	23	11780001	11800000	0.83944
23	11540001	11560000	23	11780001	11800000	0.89443
23	11520001	11540000	23	11860001	11880000	0.793208
23	108960001	108980000	23	109560001	109580000	-0.612772
23	108960001	108980000	23	109100001	109120000	-0.836503
23	108940001	108960000	23	109560001	109580000	-0.632048
23	108940001	108960000	23	109100001	109120000	-0.823265
23	106900001	106920000	23	107120001	107140000	0.862574
23	106900001	106920000	23	107000001	107020000	0.803602
23	106900001	106920000	23	106980001	107000000	0.788366
23	106880001	106900000	23	107120001	107140000	0.793497
23	106880001	106900000	23	107000001	107020000	0.885793
23	106880001	106900000	23	106980001	107000000	0.831414
23	106340001	106360000	23	107020001	107040000	-0.643326
3	50620001	50640000	3	51700001	51720000	0.623706
3	50460001	50480000	3	50560001	50580000	-0.636331
23	10140001	10160000	23	10680001	10700000	-0.610563
23	96020001	96040000	23	96940001	96960000	-0.616217
23	96020001	96040000	23	96920001	96940000	-0.600466
23	96000001	96020000	23	96940001	96960000	-0.634615
23	95880001	95900000	23	96080001	96100000	-0.697906
23	8960001	8980000	23	9280001	9300000	-0.850542
23	8940001	8960000	23	9280001	9300000	-0.891416
23	87100001	87120000	23	87300001	87320000	0.65232
23	85140001	85160000	23	85300001	85320000	-0.881899
23	85120001	85140000	23	85300001	85320000	-0.842745
23	85020001	85040000	23	85140001	85160000	0.627269
23	82120001	82140000	23	82320001	82340000	-0.769216
23	81800001	81820000	23	82040001	82060000	0.633741
23	77800001	77820000	23	78440001	78460000	0.839478
23	77360001	77380000	23	78340001	78360000	0.625897
23	77140001	77160000	23	77360001	77380000	0.615127
23	75520001	75540000	23	75680001	75700000	-0.710338
23	75500001	75520000	23	75680001	75700000	-0.718517
23	75500001	75520000	23	75660001	75680000	-0.637735
23	74100001	74120000	23	74240001	74260000	0.732235
23	73060001	73080000	23	73340001	73360000	-0.694459
23	70620001	70640000	23	70780001	70800000	-0.659
23	70620001	70640000	23	70760001	70780000	-0.620766
23	70600001	70620000	23	70780001	70800000	-0.617893
23	64780001	64800000	23	65940001	65960000	0.602358
3	46320001	46340000	3	46400001	46420000	-0.964322
3	46300001	46320000	3	46400001	46420000	-0.956672
3	46140001	46160000	3	46420001	46440000	-0.859059
3	46120001	46140000	3	46420001	46440000	-0.862219
3	46120001	46140000	3	46400001	46420000	-0.869199
3	45980001	46000000	3	46420001	46440000	-0.879707
3	45980001	46000000	3	46400001	46420000	-0.902704
3	45800001	45820000	3	46120001	46140000	-0.684741
3	45800001	45820000	3	46100001	46120000	-0.714026
3	45800001	45820000	3	45960001	45980000	-0.683376
3	45780001	45800000	3	45960001	45980000	-0.694444
23	53340001	53360000	23	53460001	53480000	-0.663972
23	47980001	48000000	23	48300001	48320000	0.747581
23	46400001	46420000	23	46500001	46520000	-0.604705
23	45360001	45380000	23	45720001	45740000	-0.641595
23	45360001	45380000	23	45700001	45720000	-0.776183
23	37600001	37620000	23	37680001	37700000	-0.605271
23	23920001	23940000	23	24040001	24060000	0.603794
23	20860001	20880000	23	21520001	21540000	0.670092
23	20240001	20260000	23	20460001	20480000	-0.628633
3	40220001	40240000	3	40360001	40380000	-0.824053
3	40220001	40240000	3	40340001	40360000	-0.787266
22	19960001	19980000	22	20080001	20100000	0.79421
3	39460001	39480000	3	40340001	40360000	0.604161
3	39440001	39460000	3	40480001	40500000	0.967347
3	39440001	39460000	3	40340001	40360000	0.723151
3	39420001	39440000	3	40340001	40360000	0.740031
3	39240001	39260000	3	39320001	39340000	-0.799601
3	39220001	39240000	3	39320001	39340000	-0.770448
3	39160001	39180000	3	39320001	39340000	-0.631522
22	18940001	18960000	22	19140001	19160000	0.777292
22	17560001	17580000	22	17960001	17980000	-0.605177
22	17540001	17560000	22	17980001	18000000	-0.668964
22	17540001	17560000	22	17960001	17980000	-0.655022
22	17520001	17540000	22	17980001	18000000	-0.706797
22	17500001	17520000	22	18000001	18020000	-0.666797
3	37060001	37080000	3	37260001	37280000	-0.702389
3	37060001	37080000	3	37240001	37260000	-0.732751
3	37040001	37060000	3	37260001	37280000	-0.688774
3	36760001	36780000	3	37240001	37260000	0.61992
3	32420001	32440000	3	32500001	32520000	0.65693
3	32220001	32240000	3	32500001	32520000	0.720935
3	32200001	32220000	3	32500001	32520000	0.784623
3	32200001	32220000	3	32440001	32460000	0.715892
3	32200001	32220000	3	32400001	32420000	0.618825
3	30660001	30680000	3	32480001	32500000	0.665302
3	27520001	27540000	3	27680001	27700000	-0.620323
3	27500001	27520000	3	27680001	27700000	-0.612163
3	25700001	25720000	3	25820001	25840000	-0.632071
3	25700001	25720000	3	25800001	25820000	-0.602753
22	50680001	50700000	22	51040001	51060000	0.76465
22	50680001	50700000	22	50940001	50960000	0.919697
22	50680001	50700000	22	50920001	50940000	0.846268
22	50680001	50700000	22	50760001	50780000	0.743099
22	46760001	46780000	22	46920001	46940000	-0.726764
22	46740001	46760000	22	46940001	46960000	-0.692227
22	46740001	46760000	22	46920001	46940000	-0.736604
22	46520001	46540000	22	46700001	46720000	-0.700976
22	46500001	46520000	22	46940001	46960000	-0.861481
22	46400001	46420000	22	46500001	46520000	0.687249
22	46380001	46400000	22	46500001	46520000	0.683806
22	44560001	44580000	22	45000001	45020000	-0.861221
22	44500001	44520000	22	44780001	44800000	-0.825683
22	44480001	44500000	22	45000001	45020000	-0.777364
22	44460001	44480000	22	45020001	45040000	-0.726832
22	43780001	43800000	22	45020001	45040000	-0.684661
22	43780001	43800000	22	45000001	45020000	-0.627765
22	43620001	43640000	22	43760001	43780000	-0.641559
22	40640001	40660000	22	40720001	40740000	0.613643
22	40440001	40460000	22	40740001	40760000	0.669168
22	40440001	40460000	22	40720001	40740000	0.704956
22	39260001	39280000	22	39380001	39400000	0.600284
3	23920001	23940000	3	25640001	25660000	0.676018
22	38460001	38480000	22	38980001	39000000	-0.788128
22	38440001	38460000	22	39000001	39020000	-0.717674
22	38440001	38460000	22	38980001	39000000	-0.664109
22	36020001	36040000	22	36300001	36320000	-0.626507
22	31340001	31360000	22	31480001	31500000	0.643759
22	31340001	31360000	22	31460001	31480000	0.658943
22	31320001	31340000	22	31460001	31480000	0.624003
22	31020001	31040000	22	31640001	31660000	0.818447
22	31020001	31040000	22	31600001	31620000	0.650104
22	31020001	31040000	22	31320001	31340000	0.650505
22	31000001	31020000	22	31600001	31620000	0.621411
22	30780001	30800000	22	30860001	30880000	0.612164
22	30680001	30700000	22	30760001	30780000	0.613379
22	28920001	28940000	22	29080001	29100000	0.710563
22	24720001	24740000	22	24900001	24920000	-0.65256
22	24700001	24720000	22	24920001	24940000	-0.715303
22	24700001	24720000	22	24900001	24920000	-0.695274
22	24400001	24420000	22	24640001	24660000	-0.724071
22	23500001	23520000	22	23620001	23640000	0.668247
22	23300001	23320000	22	23460001	23480000	-0.688334
22	23280001	23300000	22	23460001	23480000	-0.759803
22	23120001	23140000	22	23220001	23240000	-0.605795
22	23060001	23080000	22	23220001	23240000	-0.744753
22	23040001	23060000	22	23220001	23240000	-0.69211
22	23020001	23040000	22	23300001	23320000	-0.624526
22	22060001	22080000	22	22300001	22320000	-0.829077
22	22040001	22060000	22	22300001	22320000	-0.815927
21	18760001	18780000	21	19280001	19300000	0.609811
21	18700001	18720000	21	19380001	19400000	0.675638
21	17840001	17860000	21	18260001	18280000	-0.613867
21	16880001	16900000	21	17100001	17120000	0.609318
21	16880001	16900000	21	17080001	17100000	0.645172
21	15900001	15920000	21	16080001	16100000	-0.768947
21	15900001	15920000	21	16040001	16060000	-0.825296
21	15880001	15900000	21	16080001	16100000	-0.758205
21	15860001	15880000	21	16080001	16100000	-0.677608
21	46700001	46720000	21	46860001	46880000	0.666291
21	46360001	46380000	21	46860001	46880000	-0.631566
21	46360001	46380000	21	46840001	46860000	-0.602498
21	45540001	45560000	21	45880001	45900000	0.780168
21	45520001	45540000	21	46220001	46240000	0.618968
21	44600001	44620000	21	44960001	44980000	-0.657754
21	44360001	44380000	21	45020001	45040000	0.605017
21	43560001	43580000	21	43680001	43700000	0.600807
21	43560001	43580000	21	43660001	43680000	0.613228
21	43220001	43240000	21	43520001	43540000	-0.73929
21	42660001	42680000	21	42820001	42840000	0.679546
21	36100001	36120000	21	36980001	37000000	-0.617702
21	35800001	35820000	21	36000001	36020000	-0.60876
21	35760001	35780000	21	35980001	36000000	-0.607964
21	35740001	35760000	21	35980001	36000000	-0.611488
21	33780001	33800000	21	33960001	33980000	-0.656934
21	33780001	33800000	21	33940001	33960000	-0.674426
21	32200001	32220000	21	32440001	32460000	-0.658163
21	32200001	32220000	21	32420001	32440000	-0.623169
21	27120001	27140000	21	27540001	27560000	0.606819
21	27100001	27120000	21	27540001	27560000	0.611629
21	26980001	27000000	21	27080001	27100000	-0.618885
21	26960001	26980000	21	27100001	27120000	-0.641261
21	26960001	26980000	21	27080001	27100000	-0.636131
21	26800001	26820000	21	27080001	27100000	-0.671589
21	26780001	26800000	21	27080001	27100000	-0.702865
20	18840001	18860000	20	19260001	19280000	-0.771256
20	18840001	18860000	20	19000001	19020000	-0.618138
20	18840001	18860000	20	18920001	18940000	-0.671368
20	18260001	18280000	20	18460001	18480000	0.764846
20	18260001	18280000	20	18440001	18460000	0.751311
20	18260001	18280000	20	20020001	20040000	0.621697
2	198060001	198080000	2	198160001	198180000	0.761571
2	198040001	198060000	2	198240001	198260000	0.67194
2	198040001	198060000	2	198220001	198240000	0.678614
2	198040001	198060000	2	198180001	198200000	0.667014
20	17940001	17960000	20	18120001	18140000	0.823347
2	197020001	197040000	2	197120001	197140000	0.807939
2	196980001	197000000	2	197140001	197160000	0.807904
2	196980001	197000000	2	197120001	197140000	0.860474
2	196940001	196960000	2	197200001	197220000	0.630757
2	196940001	196960000	2	197180001	197200000	0.738828
2	196940001	196960000	2	197160001	197180000	0.809812
2	196940001	196960000	2	197140001	197160000	0.874827
2	196920001	196940000	2	197200001	197220000	0.742243
2	196520001	196540000	2	196920001	196940000	0.782064
2	19540001	19560000	2	20220001	20240000	0.907671
2	193780001	193800000	2	194160001	194180000	0.658278
2	192560001	192580000	2	193020001	193040000	0.686668
2	192540001	192560000	2	193020001	193040000	0.687369
2	192440001	192460000	2	192540001	192560000	0.636159
2	192040001	192060000	2	193020001	193040000	0.738718
2	192020001	192040000	2	193020001	193040000	0.79572
2	191920001	191940000	2	193020001	193040000	0.684778
2	191900001	191920000	2	193020001	193040000	0.654106
2	191900001	191920000	2	192540001	192560000	0.609567
2	191760001	191780000	2	191860001	191880000	0.715139
2	191760001	191780000	2	191840001	191860000	0.741069
2	191740001	191760000	2	191840001	191860000	0.799189
2	191380001	191400000	2	191520001	191540000	0.725614
2	191260001	191280000	2	191520001	191540000	0.647898
2	191240001	191260000	2	191660001	191680000	0.713069
2	191240001	191260000	2	191380001	191400000	0.666533
20	1100001	1120000	20	1440001	1460000	0.637622
20	1080001	1100000	20	1440001	1460000	0.645834
2	190620001	190640000	2	191840001	191860000	0.686693
2	190520001	190540000	2	190640001	190660000	0.75118
2	190520001	190540000	2	190620001	190640000	0.696654
2	190320001	190340000	2	190500001	190520000	0.713112
2	190300001	190320000	2	190620001	190640000	0.883779
20	9960001	9980000	20	10500001	10520000	-0.935299
2	189960001	189980000	2	190260001	190280000	0.619708
2	189960001	189980000	2	190240001	190260000	0.608421
2	189960001	189980000	2	190200001	190220000	0.610526
20	9960001	9980000	20	10060001	10080000	-0.712368
20	9940001	9960000	20	10380001	10400000	-0.607883
2	189940001	189960000	2	190260001	190280000	0.633982
20	9380001	9400000	20	9580001	9600000	-0.642863
20	800001	820000	20	1180001	1200000	0.819768
20	780001	800000	20	1180001	1200000	0.810376
2	187360001	187380000	2	187500001	187520000	-0.78801
2	187360001	187380000	2	187480001	187500000	-0.848441
20	62180001	62200000	20	62280001	62300000	0.61569
20	62120001	62140000	20	62740001	62760000	-0.786632
20	58640001	58660000	20	58820001	58840000	-0.838177
20	58540001	58560000	20	58820001	58840000	-0.755515
20	58520001	58540000	20	59820001	59840000	-0.626058
20	58520001	58540000	20	58840001	58860000	-0.733084
20	58520001	58540000	20	58820001	58840000	-0.809302
20	57240001	57260000	20	57440001	57460000	0.734608
20	57220001	57240000	20	57620001	57640000	0.728831
20	55960001	55980000	20	57720001	57740000	0.836152
20	55960001	55980000	20	56280001	56300000	0.615929
20	55940001	55960000	20	57460001	57480000	0.859969
20	5540001	5560000	20	5920001	5940000	-0.688238
20	5520001	5540000	20	6000001	6020000	-0.625847
20	5520001	5540000	20	5980001	6000000	-0.772107
20	5520001	5540000	20	5960001	5980000	-0.709488
20	5520001	5540000	20	5940001	5960000	-0.736045
20	55120001	55140000	20	56780001	56800000	0.633749
20	55120001	55140000	20	56760001	56780000	0.635649
20	5500001	5520000	20	6060001	6080000	-0.626447
20	5500001	5520000	20	6040001	6060000	-0.673226
20	5500001	5520000	20	5980001	6000000	-0.774466
20	54960001	54980000	20	55040001	55060000	-0.782421
20	5480001	5500000	20	6060001	6080000	-0.603201
20	50020001	50040000	20	50140001	50160000	-0.621826
20	50020001	50040000	20	50120001	50140000	-0.665857
20	49100001	49120000	20	49180001	49200000	-0.64523
20	48800001	48820000	20	49340001	49360000	0.694044
20	48800001	48820000	20	49060001	49080000	-0.618876
20	48780001	48800000	20	49540001	49560000	0.855494
20	48780001	48800000	20	49340001	49360000	0.760986
20	48580001	48600000	20	49060001	49080000	-0.773463
20	48580001	48600000	20	48680001	48700000	-0.629783
20	47940001	47960000	20	48140001	48160000	-0.644747
20	47940001	47960000	20	48120001	48140000	-0.655281
20	4580001	4600000	20	4700001	4720000	-0.830604
20	4580001	4600000	20	4680001	4700000	-0.739007
20	43980001	44000000	20	44060001	44080000	-0.770836
20	43960001	43980000	20	44060001	44080000	-0.762031
20	42560001	42580000	20	42680001	42700000	-0.618168
20	39360001	39380000	20	39580001	39600000	-0.814482
20	37280001	37300000	20	37520001	37540000	0.648752
20	37260001	37280000	20	37520001	37540000	0.643423
20	3680001	3700000	20	4060001	4080000	-0.701042
20	3660001	3680000	20	4060001	4080000	-0.615956
20	35620001	35640000	20	36160001	36180000	0.753118
20	35620001	35640000	20	36140001	36160000	0.654373
2	183040001	183060000	2	183840001	183860000	-0.631923
2	183040001	183060000	2	183520001	183540000	-0.685422
20	2500001	2520000	20	2620001	2640000	-0.742703
20	24960001	24980000	20	25160001	25180000	0.615052
20	2480001	2500000	20	2620001	2640000	-0.732937
20	23420001	23440000	20	23580001	23600000	-0.869946
20	23400001	23420000	20	23580001	23600000	-0.866736
20	23400001	23420000	20	23560001	23580000	-0.860183
20	23300001	23320000	20	23580001	23600000	-0.785105
20	2320001	2340000	20	2420001	2440000	-0.890988
20	22660001	22680000	20	23580001	23600000	-0.610014
20	20060001	20080000	20	20560001	20580000	-0.68342
20	20060001	20080000	20	20540001	20560000	-0.662116
20	20060001	20080000	20	20220001	20240000	-0.705812
20	20040001	20060000	20	20560001	20580000	-0.70768
20	20040001	20060000	20	20540001	20560000	-0.663321
20	20020001	20040000	20	21120001	21140000	0.63175
20	20020001	20040000	20	21080001	21100000	0.810251
20	20000001	20020000	20	21100001	21120000	0.72207
20	20000001	20020000	20	21080001	21100000	0.762916
2	180980001	181000000	2	182580001	182600000	-0.762828
2	180980001	181000000	2	182560001	182580000	-0.778911
2	180980001	181000000	2	182540001	182560000	-0.648913
19	19280001	19300000	19	19580001	19600000	0.743626
19	18360001	18380000	19	18500001	18520000	0.652433
19	18340001	18360000	19	18500001	18520000	0.663997
19	18300001	18320000	19	18440001	18460000	0.61622
2	178080001	178100000	2	178180001	178200000	0.645136
2	178080001	178100000	2	178160001	178180000	0.681485
2	178040001	178060000	2	178480001	178500000	0.614631
2	178040001	178060000	2	178180001	178200000	0.641953
2	178040001	178060000	2	178160001	178180000	0.682056
2	178020001	178040000	2	178480001	178500000	0.668728
2	178020001	178040000	2	178160001	178180000	0.657602
19	17960001	17980000	19	18100001	18120000	0.890494
19	17800001	17820000	19	18020001	18040000	0.667596
2	177520001	177540000	2	177980001	178000000	-0.715255
2	177500001	177520000	2	177980001	178000000	-0.788896
19	17180001	17200000	19	17340001	17360000	-0.633913
19	17180001	17200000	19	17320001	17340000	-0.669729
19	17180001	17200000	19	17300001	17320000	-0.747531
19	17180001	17200000	19	17280001	17300000	-0.737272
2	176560001	176580000	2	176940001	176960000	-0.61397
2	176540001	176560000	2	176960001	176980000	-0.639688
2	176540001	176560000	2	176940001	176960000	-0.6297
19	15920001	15940000	19	16280001	16300000	0.704791
19	15720001	15740000	19	15980001	16000000	-0.835265
19	15300001	15320000	19	15660001	15680000	-0.608513
19	14680001	14700000	19	14780001	14800000	-0.841124
2	173900001	173920000	2	174060001	174080000	-0.806871
2	173880001	173900000	2	174080001	174100000	-0.778358
2	173880001	173900000	2	174060001	174080000	-0.791183
2	172960001	172980000	2	173320001	173340000	0.611821
2	172940001	172960000	2	173320001	173340000	0.654355
19	12660001	12680000	19	12780001	12800000	0.680195
19	11140001	11160000	19	11300001	11320000	-0.657042
19	1100001	1120000	19	1200001	1220000	0.732338
19	1100001	1120000	19	1180001	1200000	0.735973
19	1080001	1100000	19	1220001	1240000	0.698778
19	1060001	1080000	19	1260001	1280000	0.609284
19	1060001	1080000	19	1220001	1240000	0.642108
2	170320001	170340000	2	170420001	170440000	-0.706844
2	170320001	170340000	2	170400001	170420000	-0.646736
19	1020001	1040000	19	1240001	1260000	0.603335
19	9300001	9320000	19	9900001	9920000	-0.684177
19	9300001	9320000	19	9820001	9840000	-0.681075
19	9240001	9260000	19	9920001	9940000	-0.613898
19	9240001	9260000	19	9900001	9920000	-0.833151
19	860001	880000	19	980001	1000000	0.815812
19	840001	860000	19	980001	1000000	0.850765
19	760001	780000	19	980001	1000000	0.865035
19	6620001	6640000	19	6860001	6880000	-0.611135
19	6620001	6640000	19	6840001	6860000	-0.78423
19	6620001	6640000	19	6720001	6740000	-0.824747
19	6520001	6540000	19	6860001	6880000	-0.697196
19	6520001	6540000	19	6840001	6860000	-0.807718
19	6520001	6540000	19	6720001	6740000	-0.767562
19	6500001	6520000	19	6860001	6880000	-0.764147
19	6500001	6520000	19	6720001	6740000	-0.727609
2	166260001	166280000	2	166560001	166580000	-0.77105
19	580001	600000	19	720001	740000	0.8213
19	56580001	56600000	19	56820001	56840000	-0.605607
19	55800001	55820000	19	55880001	55900000	-0.643166
19	54980001	55000000	19	55180001	55200000	-0.791913
19	54820001	54840000	19	54900001	54920000	-0.722069
19	54300001	54320000	19	54520001	54540000	-0.614562
19	51840001	51860000	19	51920001	51940000	-0.736685
19	51820001	51840000	19	51920001	51940000	-0.750086
19	51520001	51540000	19	51700001	51720000	-0.711972
19	51520001	51540000	19	51660001	51680000	-0.83978
19	51500001	51520000	19	51680001	51700000	-0.788329
19	51500001	51520000	19	51660001	51680000	-0.821876
19	49540001	49560000	19	49880001	49900000	0.976193
19	49540001	49560000	19	49860001	49880000	0.963946
19	49540001	49560000	19	49780001	49800000	0.809803
19	49520001	49540000	19	49900001	49920000	0.9363
19	49520001	49540000	19	49700001	49720000	0.678234
19	49520001	49540000	19	49680001	49700000	0.717796
19	49520001	49540000	19	49660001	49680000	0.697968
19	48840001	48860000	19	49080001	49100000	-0.631735
19	48320001	48340000	19	49040001	49060000	0.63985
19	47940001	47960000	19	48200001	48220000	-0.734301
19	47780001	47800000	19	48200001	48220000	-0.601518
19	47780001	47800000	19	47900001	47920000	-0.761728
19	47780001	47800000	19	47880001	47900000	-0.700691
19	47380001	47400000	19	47480001	47500000	-0.846157
19	47360001	47380000	19	47520001	47540000	-0.75404
19	47360001	47380000	19	47500001	47520000	-0.786584
19	47360001	47380000	19	47480001	47500000	-0.837711
19	47340001	47360000	19	47540001	47560000	-0.674339
19	46900001	46920000	19	47000001	47020000	-0.73635
19	46880001	46900000	19	47020001	47040000	-0.724234
19	46880001	46900000	19	47000001	47020000	-0.804444
19	46780001	46800000	19	47000001	47020000	-0.94575
19	46780001	46800000	19	46980001	47000000	-0.946107
19	46540001	46560000	19	46980001	47000000	-0.656053
19	46540001	46560000	19	46960001	46980000	-0.658448
19	46540001	46560000	19	46760001	46780000	-0.662636
19	46520001	46540000	19	46760001	46780000	-0.632192
19	45400001	45420000	19	45840001	45860000	-0.612101
19	4240001	4260000	19	4520001	4540000	-0.691475
19	41940001	41960000	19	42080001	42100000	-0.914706
19	41940001	41960000	19	42060001	42080000	-0.840025
19	41840001	41860000	19	42060001	42080000	0.689995
19	41820001	41840000	19	42060001	42080000	0.700434
19	41480001	41500000	19	41640001	41660000	-0.795413
19	41460001	41480000	19	41660001	41680000	-0.672867
19	41460001	41480000	19	41640001	41660000	-0.742002
19	41460001	41480000	19	41600001	41620000	-0.739547
19	41420001	41440000	19	41640001	41660000	-0.60359
19	39620001	39640000	19	39800001	39820000	-0.80935
19	39600001	39620000	19	40000001	40020000	-0.600199
19	39600001	39620000	19	39800001	39820000	-0.650873
19	39240001	39260000	19	39380001	39400000	-0.774725
19	39240001	39260000	19	39360001	39380000	-0.827618
19	39240001	39260000	19	39340001	39360000	-0.838994
19	39220001	39240000	19	39400001	39420000	-0.742602
19	39220001	39240000	19	39380001	39400000	-0.78287
19	39220001	39240000	19	39360001	39380000	-0.851729
19	39120001	39140000	19	39400001	39420000	-0.738838
19	39020001	39040000	19	39180001	39200000	-0.658173
19	39020001	39040000	19	39120001	39140000	-0.781205
19	39020001	39040000	19	39100001	39120000	-0.804958
19	39000001	39020000	19	39120001	39140000	-0.745884
19	38720001	38740000	19	39380001	39400000	0.646162
19	38380001	38400000	19	39400001	39420000	0.768169
19	35840001	35860000	19	35960001	35980000	-0.838952
19	35820001	35840000	19	35960001	35980000	-0.874197
19	31260001	31280000	19	32700001	32720000	-0.621299
19	30240001	30260000	19	30360001	30380000	0.729774
19	30240001	30260000	19	30340001	30360000	0.601532
19	30220001	30240000	19	30360001	30380000	0.786266
19	30100001	30120000	19	30420001	30440000	0.669936
19	30100001	30120000	19	30360001	30380000	0.629962
19	30100001	30120000	19	30340001	30360000	0.697681
19	30080001	30100000	19	30340001	30360000	0.637523
2	162840001	162860000	2	162960001	162980000	0.770354
2	162840001	162860000	2	162940001	162960000	0.745581
2	162820001	162840000	2	162960001	162980000	0.812831
2	162780001	162800000	2	162960001	162980000	0.815485
2	162700001	162720000	2	162960001	162980000	0.823653
19	2640001	2660000	19	2880001	2900000	0.617439
19	2640001	2660000	19	2860001	2880000	0.653991
2	162440001	162460000	2	163140001	163160000	0.671978
2	162440001	162460000	2	162980001	163000000	0.722171
2	162440001	162460000	2	162960001	162980000	0.762764
2	162440001	162460000	2	162880001	162900000	0.761428
2	162440001	162460000	2	162800001	162820000	0.736929
2	162440001	162460000	2	162780001	162800000	0.856229
2	162420001	162440000	2	162980001	163000000	0.757648
2	162420001	162440000	2	162960001	162980000	0.802224
2	162400001	162420000	2	162660001	162680000	0.777691
2	162100001	162120000	2	163160001	163180000	0.776383
2	162060001	162080000	2	163160001	163180000	0.719001
2	162000001	162020000	2	163160001	163180000	0.668158
2	160760001	160780000	2	162000001	162020000	0.695006
2	159720001	159740000	2	159980001	160000000	0.602964
2	159720001	159740000	2	159960001	159980000	0.65051
18	18700001	18720000	18	19100001	19120000	0.717375
18	18680001	18700000	18	19180001	19200000	0.766308
18	18680001	18700000	18	19160001	19180000	0.767441
2	158640001	158660000	2	159600001	159620000	0.685243
2	158620001	158640000	2	158840001	158860000	0.601071
18	18600001	18620000	18	18680001	18700000	-0.72672
18	18580001	18600000	18	18700001	18720000	-0.851021
18	18560001	18580000	18	19420001	19440000	0.61806
18	18560001	18580000	18	18720001	18740000	-0.785306
18	18560001	18580000	18	18700001	18720000	-0.862306
18	18560001	18580000	18	18680001	18700000	-0.825604
18	18540001	18560000	18	18780001	18800000	-0.875401
18	18540001	18560000	18	18760001	18780000	-0.761936
18	18540001	18560000	18	18740001	18760000	-0.796926
18	18540001	18560000	18	18700001	18720000	-0.896916
18	18540001	18560000	18	18680001	18700000	-0.86093
18	18520001	18540000	18	18780001	18800000	-0.87278
18	18520001	18540000	18	18640001	18660000	-0.75854
2	158360001	158380000	2	159600001	159620000	0.757497
2	158340001	158360000	2	159600001	159620000	0.809368
2	158340001	158360000	2	159300001	159320000	0.815841
2	158340001	158360000	2	158860001	158880000	0.774703
2	158320001	158340000	2	158740001	158760000	0.64974
2	158180001	158200000	2	158320001	158340000	0.917522
2	158180001	158200000	2	158300001	158320000	0.94649
2	158180001	158200000	2	158280001	158300000	0.96029
2	158180001	158200000	2	158260001	158280000	0.976385
2	158160001	158180000	2	158620001	158640000	0.76514
2	158160001	158180000	2	158600001	158620000	0.690934
2	158160001	158180000	2	158460001	158480000	0.601396
2	158160001	158180000	2	158340001	158360000	0.867794
2	158140001	158160000	2	158620001	158640000	0.620653
2	156220001	156240000	2	158040001	158060000	-0.632903
2	156220001	156240000	2	158020001	158040000	-0.683073
2	153860001	153880000	2	154120001	154140000	-0.626896
2	153860001	153880000	2	154060001	154080000	-0.707212
18	12380001	12400000	18	12940001	12960000	0.711699
18	12380001	12400000	18	12920001	12940000	0.772242
18	12360001	12380000	18	12920001	12940000	0.772612
18	9940001	9960000	18	11840001	11860000	0.679148
18	960001	980000	18	2040001	2060000	-0.925468
18	9600001	9620000	18	9920001	9940000	-0.607299
18	9600001	9620000	18	9900001	9920000	-0.603364
2	149400001	149420000	2	149820001	149840000	0.632707
2	149280001	149300000	2	149400001	149420000	0.655179
2	149280001	149300000	2	149380001	149400000	0.710625
2	148740001	148760000	2	149660001	149680000	0.624276
18	8720001	8740000	18	9340001	9360000	0.800852
18	8660001	8680000	18	9320001	9340000	0.808743
18	8640001	8660000	18	9500001	9520000	0.620858
18	8640001	8660000	18	9320001	9340000	0.738548
18	8640001	8660000	18	9160001	9180000	0.828413
18	8620001	8640000	18	9300001	9320000	0.727281
18	8620001	8640000	18	9180001	9200000	0.758553
18	8620001	8640000	18	9160001	9180000	0.758241
18	8620001	8640000	18	9140001	9160000	0.772194
18	8600001	8620000	18	9920001	9940000	0.626803
18	8600001	8620000	18	9320001	9340000	0.678389
18	8600001	8620000	18	9160001	9180000	0.758136
18	8600001	8620000	18	9140001	9160000	0.818566
18	8600001	8620000	18	9080001	9100000	0.639748
18	77160001	77180000	18	77260001	77280000	0.696054
18	77140001	77160000	18	77720001	77740000	0.700782
18	77140001	77160000	18	77420001	77440000	0.717064
18	77140001	77160000	18	77400001	77420000	0.754931
18	77140001	77160000	18	77280001	77300000	0.671385
18	77140001	77160000	18	77260001	77280000	0.700023
18	77120001	77140000	18	77400001	77420000	0.761919
18	7520001	7540000	18	8140001	8160000	-0.640409
18	74740001	74760000	18	75120001	75140000	-0.851119
18	74720001	74740000	18	75160001	75180000	-0.729828
18	74720001	74740000	18	75140001	75160000	-0.787726
18	72360001	72380000	18	73160001	73180000	-0.606995
18	72260001	72280000	18	73180001	73200000	-0.61986
18	72260001	72280000	18	73160001	73180000	-0.682752
18	7220001	7240000	18	8380001	8400000	-0.62228
18	67860001	67880000	18	68100001	68120000	-0.648464
18	67840001	67860000	18	68100001	68120000	-0.71386
18	60880001	60900000	18	60960001	60980000	0.773285
18	60860001	60880000	18	60960001	60980000	0.776839
18	60820001	60840000	18	60960001	60980000	0.790007
18	60800001	60820000	18	60980001	61000000	0.700773
18	60800001	60820000	18	60960001	60980000	0.78107
18	59840001	59860000	18	59920001	59940000	-0.625788
18	52340001	52360000	18	52640001	52660000	-0.747725
18	52340001	52360000	18	52620001	52640000	-0.750146
18	52320001	52340000	18	52640001	52660000	-0.733748
2	144940001	144960000	2	145080001	145100000	-0.644243
2	144920001	144940000	2	145260001	145280000	-0.614582
18	48640001	48660000	18	49080001	49100000	-0.835221
18	48620001	48640000	18	49100001	49120000	-0.705519
18	48620001	48640000	18	49060001	49080000	-0.815343
18	47020001	47040000	18	47880001	47900000	0.648388
18	47000001	47020000	18	47880001	47900000	0.625711
18	46480001	46500000	18	46960001	46980000	-0.605387
18	46340001	46360000	18	46460001	46480000	-0.888848
18	46320001	46340000	18	46460001	46480000	-0.913962
18	46320001	46340000	18	46440001	46460000	-0.944915
18	46320001	46340000	18	46420001	46440000	-0.942548
18	46300001	46320000	18	46500001	46520000	-0.770817
18	46300001	46320000	18	46440001	46460000	-0.942967
18	46240001	46260000	18	46940001	46960000	-0.883487
18	46220001	46240000	18	46940001	46960000	-0.856677
18	46200001	46220000	18	47380001	47400000	-0.66764
18	46200001	46220000	18	46960001	46980000	-0.81608
18	46180001	46200000	18	47380001	47400000	-0.699801
18	43720001	43740000	18	44040001	44060000	0.610171
18	42260001	42280000	18	42360001	42380000	-0.696393
18	42240001	42260000	18	42780001	42800000	-0.632397
18	36040001	36060000	18	36760001	36780000	-0.615286
18	33720001	33740000	18	34400001	34420000	0.610459
18	33700001	33720000	18	34400001	34420000	0.692668
18	33560001	33580000	18	33720001	33740000	0.600051
18	29380001	29400000	18	30140001	30160000	0.683462
18	29120001	29140000	18	29300001	29320000	-0.616576
18	23500001	23520000	18	23720001	23740000	-0.724664
18	2320001	2340000	18	2520001	2540000	-0.65725
18	21080001	21100000	18	21160001	21180000	-0.750784
18	20380001	20400000	18	20980001	21000000	-0.735459
18	20380001	20400000	18	20960001	20980000	-0.75773
17	19900001	19920000	17	20020001	20040000	-0.749084
2	138940001	138960000	2	139520001	139540000	-0.92002
2	138700001	138720000	2	139560001	139580000	-0.602848
17	17580001	17600000	17	17760001	17780000	0.656356
17	15160001	15180000	17	15400001	15420000	-0.658185
17	14080001	14100000	17	14320001	14340000	0.781058
17	13640001	13660000	17	14140001	14160000	-0.735783
17	13500001	13520000	17	14820001	14840000	-0.743929
17	13480001	13500000	17	14820001	14840000	-0.694857
17	13480001	13500000	17	14700001	14720000	-0.793387
17	13480001	13500000	17	14680001	14700000	-0.802966
17	13240001	13260000	17	14840001	14860000	-0.611625
17	1260001	1280000	17	1520001	1540000	0.85117
17	1260001	1280000	17	1420001	1440000	0.751702
17	1260001	1280000	17	1400001	1420000	0.653782
17	11880001	11900000	17	11980001	12000000	0.612488
17	11860001	11880000	17	12020001	12040000	0.639616
17	11860001	11880000	17	11960001	11980000	0.635772
2	130940001	130960000	2	131080001	131100000	0.65484
17	10640001	10660000	17	10740001	10760000	0.870962
17	10640001	10660000	17	10720001	10740000	0.820165
17	10620001	10640000	17	10740001	10760000	0.941303
17	10540001	10560000	17	10740001	10760000	0.906203
17	10540001	10560000	17	10640001	10660000	0.784554
17	10380001	10400000	17	10780001	10800000	0.614901
17	10360001	10380000	17	10920001	10940000	0.694702
17	9940001	9960000	17	10100001	10120000	-0.741883
17	9860001	9880000	17	10120001	10140000	-0.760115
17	9840001	9860000	17	10500001	10520000	-0.72162
17	9840001	9860000	17	10240001	10260000	-0.780753
17	9840001	9860000	17	10200001	10220000	-0.754254
17	9840001	9860000	17	10120001	10140000	-0.754063
17	9820001	9840000	17	10520001	10540000	-0.730156
17	9820001	9840000	17	10500001	10520000	-0.71042
17	9820001	9840000	17	10120001	10140000	-0.743023
17	9280001	9300000	17	9420001	9440000	-0.827113
17	8900001	8920000	17	9440001	9460000	-0.658038
17	8900001	8920000	17	9420001	9440000	-0.693964
17	8480001	8500000	17	8880001	8900000	-0.865486
2	128460001	128480000	2	128580001	128600000	0.678765
17	8420001	8440000	17	9420001	9440000	-0.811449
17	80740001	80760000	17	81060001	81080000	-0.790543
17	80320001	80340000	17	80500001	80520000	0.669535
17	80300001	80320000	17	80500001	80520000	0.624461
17	8020001	8040000	17	8120001	8140000	0.722853
17	8020001	8040000	17	8100001	8120000	0.798658
17	80180001	80200000	17	80280001	80300000	0.781565
17	80180001	80200000	17	80260001	80280000	0.760637
17	80000001	80020000	17	80100001	80120000	0.846652
17	79980001	80000000	17	80100001	80120000	0.86419
17	79900001	79920000	17	80100001	80120000	0.804347
17	7980001	8000000	17	8660001	8680000	-0.853729
17	7980001	8000000	17	8640001	8660000	-0.777717
17	7960001	7980000	17	8660001	8680000	-0.612652
17	78960001	78980000	17	79060001	79080000	0.760207
17	78440001	78460000	17	79400001	79420000	0.831814
17	78400001	78420000	17	79080001	79100000	0.907165
17	78400001	78420000	17	79060001	79080000	0.811326
17	78380001	78400000	17	79080001	79100000	0.855319
17	78380001	78400000	17	79060001	79080000	0.739347
17	77720001	77740000	17	77960001	77980000	0.62904
17	77700001	77720000	17	77960001	77980000	0.674872
17	7740001	7760000	17	8040001	8060000	0.890717
17	76480001	76500000	17	76840001	76860000	-0.762891
17	76280001	76300000	17	76420001	76440000	0.769045
17	76280001	76300000	17	76400001	76420000	0.760178
17	76260001	76280000	17	76400001	76420000	0.78002
17	76260001	76280000	17	76380001	76400000	0.756875
17	76260001	76280000	17	76340001	76360000	0.799044
17	76080001	76100000	17	76400001	76420000	0.676837
17	74280001	74300000	17	74400001	74420000	0.695354
17	74020001	74040000	17	74480001	74500000	0.649336
17	73900001	73920000	17	74280001	74300000	0.75006
17	73900001	73920000	17	74000001	74020000	0.845812
17	73880001	73900000	17	74280001	74300000	0.873231
17	73420001	73440000	17	73740001	73760000	0.602533
17	73420001	73440000	17	73720001	73740000	0.661772
17	73300001	73320000	17	73400001	73420000	0.60477
17	73300001	73320000	17	73380001	73400000	0.691165
17	73100001	73120000	17	73180001	73200000	0.823754
17	73080001	73100000	17	73200001	73220000	0.77215
17	72760001	72780000	17	72860001	72880000	-0.652072
17	7240001	7260000	17	7400001	7420000	0.787928
17	71420001	71440000	17	71700001	71720000	0.857132
17	71420001	71440000	17	71680001	71700000	0.847424
17	71420001	71440000	17	71620001	71640000	0.838155
17	7120001	7140000	17	8040001	8060000	0.681603
17	70980001	71000000	17	71140001	71160000	-0.631596
17	70720001	70740000	17	71360001	71380000	-0.638367
17	70720001	70740000	17	71260001	71280000	-0.685624
17	70720001	70740000	17	71240001	71260000	-0.70995
17	70720001	70740000	17	71220001	71240000	-0.697313
17	70720001	70740000	17	71160001	71180000	-0.635381
17	70720001	70740000	17	71140001	71160000	-0.671438
17	70700001	70720000	17	71360001	71380000	-0.707612
17	70700001	70720000	17	71240001	71260000	-0.715235
17	70560001	70580000	17	71360001	71380000	-0.803254
17	70560001	70580000	17	71340001	71360000	-0.710324
17	70540001	70560000	17	71360001	71380000	-0.711588
17	6940001	6960000	17	7100001	7120000	-0.708631
17	6940001	6960000	17	7060001	7080000	-0.720079
17	6940001	6960000	17	7040001	7060000	-0.629662
17	680001	700000	17	880001	900000	0.624679
17	68200001	68220000	17	68500001	68520000	-0.881583
17	660001	680000	17	880001	900000	0.683558
17	66060001	66080000	17	66440001	66460000	-0.759829
17	66040001	66060000	17	66460001	66480000	-0.78076
17	66040001	66060000	17	66440001	66460000	-0.712847
17	66000001	66020000	17	66440001	66460000	-0.834718
17	65960001	65980000	17	66460001	66480000	-0.726773
17	65380001	65400000	17	65460001	65480000	0.657299
17	65340001	65360000	17	65900001	65920000	-0.626784
[truncated: 1,607 more rows]

## Sheet: Table S4-4
Table S4. loops that strength corrlelation with clinical parameters of SLE patients
Table S4-4. loops that strength corrlelation with WBC numbers of SLE patients
chrA	start	end	chrB	start	end	The correlation coefficient
10	17660001	17680000	10	18940001	18960000	0.806246
10	17640001	17660000	10	18400001	18420000	-0.614855
10	14660001	14680000	10	14860001	14880000	-0.736606
10	14660001	14680000	10	14840001	14860000	-0.677349
10	14640001	14660000	10	14860001	14880000	-0.716245
10	14620001	14640000	10	14860001	14880000	-0.656121
10	13820001	13840000	10	14220001	14240000	-0.630006
10	135240001	135260000	10	135320001	135340000	0.613194
10	135140001	135160000	10	135320001	135340000	0.751204
10	135120001	135140000	10	135320001	135340000	0.720461
10	135120001	135140000	10	135240001	135260000	0.713078
10	135020001	135040000	10	135380001	135400000	0.63415
10	134120001	134140000	10	134340001	134360000	0.609142
10	131680001	131700000	10	131920001	131940000	-0.714537
10	131660001	131680000	10	131920001	131940000	-0.81242
10	131260001	131280000	10	131940001	131960000	0.752506
10	131260001	131280000	10	131920001	131940000	0.841374
10	131260001	131280000	10	131900001	131920000	0.771418
10	131240001	131260000	10	131920001	131940000	0.808467
10	130000001	130020000	10	131920001	131940000	0.66719
10	130000001	130020000	10	131900001	131920000	0.67116
10	129860001	129880000	10	129940001	129960000	-0.644046
10	129840001	129860000	10	129940001	129960000	-0.739304
10	129820001	129840000	10	129940001	129960000	-0.749578
10	129700001	129720000	10	130000001	130020000	-0.793294
10	129700001	129720000	10	129940001	129960000	-0.661416
10	127680001	127700000	10	128160001	128180000	0.612899
10	125760001	125780000	10	126520001	126540000	0.796776
10	125740001	125760000	10	126440001	126460000	0.70502
10	125740001	125760000	10	126420001	126440000	0.689455
10	124760001	124780000	10	124900001	124920000	0.638658
10	124740001	124760000	10	124900001	124920000	0.709772
10	124720001	124740000	10	124900001	124920000	0.723546
10	124680001	124700000	10	125320001	125340000	0.763467
10	124680001	124700000	10	125300001	125320000	0.691951
10	124660001	124680000	10	125300001	125320000	0.780225
10	124620001	124640000	10	124900001	124920000	0.804698
10	124140001	124160000	10	124900001	124920000	0.708501
10	124140001	124160000	10	124740001	124760000	0.629529
10	124120001	124140000	10	124740001	124760000	0.634404
10	124080001	124100000	10	124300001	124320000	0.755795
10	12260001	12280000	10	12940001	12960000	-0.613111
10	122700001	122720000	10	123640001	123660000	-0.697304
10	122700001	122720000	10	123500001	123520000	-0.727726
10	122700001	122720000	10	123460001	123480000	-0.65549
10	122680001	122700000	10	123660001	123680000	-0.73331
10	122680001	122700000	10	123500001	123520000	-0.772309
10	122680001	122700000	10	123480001	123500000	-0.76243
10	121460001	121480000	10	121620001	121640000	-0.851013
10	121460001	121480000	10	121600001	121620000	-0.892353
10	121440001	121460000	10	121620001	121640000	-0.854586
10	121440001	121460000	10	121600001	121620000	-0.892988
10	121420001	121440000	10	121620001	121640000	-0.861741
10	120960001	120980000	10	121180001	121200000	-0.739064
10	120940001	120960000	10	121180001	121200000	-0.742904
10	120940001	120960000	10	121160001	121180000	-0.802686
10	120920001	120940000	10	121600001	121620000	-0.687243
10	120800001	120820000	10	121680001	121700000	-0.608144
10	120800001	120820000	10	121660001	121680000	-0.609785
10	120800001	120820000	10	121640001	121660000	-0.647667
10	120800001	120820000	10	121600001	121620000	-0.625098
10	120780001	120800000	10	121660001	121680000	-0.610451
10	120660001	120680000	10	121720001	121740000	-0.632416
10	116940001	116960000	10	118120001	118140000	-0.628356
10	116040001	116060000	10	116880001	116900000	-0.628995
10	115720001	115740000	10	115840001	115860000	-0.668269
10	115700001	115720000	10	115820001	115840000	-0.661539
10	115560001	115580000	10	115860001	115880000	-0.785113
10	115560001	115580000	10	115840001	115860000	-0.748105
10	115540001	115560000	10	115860001	115880000	-0.79475
10	115460001	115480000	10	115860001	115880000	-0.782729
10	115440001	115460000	10	115880001	115900000	-0.758957
10	115440001	115460000	10	115860001	115880000	-0.792101
10	114240001	114260000	10	115300001	115320000	-0.677702
10	114220001	114240000	10	115320001	115340000	-0.685794
10	114220001	114240000	10	115140001	115160000	-0.606138
10	114220001	114240000	10	115120001	115140000	-0.617821
10	114220001	114240000	10	114860001	114880000	-0.729277
10	114200001	114220000	10	115140001	115160000	-0.631717
10	113860001	113880000	10	115060001	115080000	-0.756551
10	11160001	11180000	10	11260001	11280000	0.612761
10	11160001	11180000	10	11240001	11260000	0.699096
10	108000001	108020000	10	108220001	108240000	0.725241
10	107540001	107560000	10	107940001	107960000	-0.670284
10	107540001	107560000	10	107660001	107680000	0.824942
10	105660001	105680000	10	105860001	105880000	-0.690949
10	105640001	105660000	10	105880001	105900000	-0.676281
10	105640001	105660000	10	105860001	105880000	-0.717353
10	105480001	105500000	10	105600001	105620000	-0.731012
10	105460001	105480000	10	105600001	105620000	-0.711386
10	104680001	104700000	10	104820001	104840000	-0.632969
10	104660001	104680000	10	105000001	105020000	-0.6543
10	104660001	104680000	10	104980001	105000000	-0.652978
10	104660001	104680000	10	104820001	104840000	-0.610165
10	104620001	104640000	10	104820001	104840000	-0.649769
10	104580001	104600000	10	105000001	105020000	-0.770727
10	104580001	104600000	10	104820001	104840000	-0.69451
10	103600001	103620000	10	103800001	103820000	-0.698682
10	103600001	103620000	10	103780001	103800000	-0.77753
10	103600001	103620000	10	103760001	103780000	-0.808675
10	102980001	103000000	10	103520001	103540000	-0.699737
10	102320001	102340000	10	102640001	102660000	-0.633784
10	102320001	102340000	10	102500001	102520000	-0.736479
10	102300001	102320000	10	102780001	102800000	-0.678987
10	102100001	102120000	10	102180001	102200000	-0.75837
10	102080001	102100000	10	102180001	102200000	-0.752459
10	101600001	101620000	10	101800001	101820000	-0.671503
10	101600001	101620000	10	101780001	101800000	-0.625713
10	99660001	99680000	10	99800001	99820000	-0.830576
10	99540001	99560000	10	99620001	99640000	-0.711579
10	99520001	99540000	10	99780001	99800000	-0.735819
10	99460001	99480000	10	99800001	99820000	-0.747381
10	99440001	99460000	10	99800001	99820000	-0.774846
10	9900001	9920000	10	10500001	10520000	-0.777144
10	98820001	98840000	10	98960001	98980000	-0.704507
10	98800001	98820000	10	98960001	98980000	-0.743862
10	96980001	97000000	10	97100001	97120000	-0.657533
10	96900001	96920000	10	97100001	97120000	-0.639921
10	96880001	96900000	10	97120001	97140000	-0.631169
10	9560001	9580000	10	9720001	9740000	-0.705499
10	94860001	94880000	10	95240001	95260000	0.633782
10	94840001	94860000	10	95260001	95280000	0.623572
10	94840001	94860000	10	95240001	95260000	0.621431
10	94660001	94680000	10	95240001	95260000	0.704616
10	94620001	94640000	10	95240001	95260000	0.600425
10	94600001	94620000	10	95240001	95260000	0.605137
10	9420001	9440000	10	10680001	10700000	-0.882964
10	9380001	9400000	10	11320001	11340000	-0.745654
10	9380001	9400000	10	11300001	11320000	-0.706769
10	9380001	9400000	10	11260001	11280000	-0.826295
10	9380001	9400000	10	11140001	11160000	-0.679293
10	9380001	9400000	10	11020001	11040000	-0.652415
10	9380001	9400000	10	10920001	10940000	-0.678973
10	9380001	9400000	10	10720001	10740000	-0.797921
10	9360001	9380000	10	11140001	11160000	-0.625206
10	9360001	9380000	10	11020001	11040000	-0.605253
10	93520001	93540000	10	93680001	93700000	-0.659683
10	93060001	93080000	10	93380001	93400000	-0.894645
10	93040001	93060000	10	93400001	93420000	-0.746716
10	85900001	85920000	10	86100001	86120000	0.671413
10	85900001	85920000	10	86080001	86100000	0.722308
10	85880001	85900000	10	86080001	86100000	0.769438
10	85060001	85080000	10	85140001	85160000	0.63848
10	8080001	8100000	10	9240001	9260000	-0.615569
10	8060001	8080000	10	9240001	9260000	-0.716921
10	7920001	7940000	10	9300001	9320000	-0.709562
10	7920001	7940000	10	9240001	9260000	-0.615933
10	7900001	7920000	10	9340001	9360000	-0.798108
10	7900001	7920000	10	9320001	9340000	-0.774634
10	7900001	7920000	10	9300001	9320000	-0.79495
10	7900001	7920000	10	9240001	9260000	-0.624898
10	7780001	7800000	10	9340001	9360000	-0.758796
10	77140001	77160000	10	77780001	77800000	-0.620346
10	75280001	75300000	10	75400001	75420000	-0.685814
10	75280001	75300000	10	75380001	75400000	-0.731428
10	74160001	74180000	10	74760001	74780000	-0.627463
10	74140001	74160000	10	74780001	74800000	-0.606199
10	74140001	74160000	10	74700001	74720000	-0.620492
10	74000001	74020000	10	74080001	74100000	0.687225
10	73060001	73080000	10	73320001	73340000	-0.782414
10	69640001	69660000	10	69820001	69840000	-0.687571
10	69640001	69660000	10	69800001	69820000	-0.710828
10	6840001	6860000	10	7640001	7660000	-0.613285
10	63800001	63820000	10	64000001	64020000	0.766846
10	63800001	63820000	10	63980001	64000000	0.790718
10	63780001	63800000	10	64000001	64020000	0.768784
10	63660001	63680000	10	64000001	64020000	0.649038
10	63640001	63660000	10	64000001	64020000	0.683412
10	63640001	63660000	10	63980001	64000000	0.605786
10	62560001	62580000	10	62720001	62740000	-0.674206
10	58040001	58060000	10	58180001	58200000	0.61594
10	5120001	5140000	10	5420001	5440000	-0.840653
10	5120001	5140000	10	5400001	5420000	-0.823499
10	5060001	5080000	10	5400001	5420000	-0.74683
10	5040001	5060000	10	5380001	5400000	-0.691252
10	49860001	49880000	10	50720001	50740000	-0.65665
10	4900001	4920000	10	5100001	5120000	-0.749911
10	4880001	4900000	10	5440001	5460000	-0.603004
10	4880001	4900000	10	5340001	5360000	-0.766335
10	4880001	4900000	10	5320001	5340000	-0.798374
10	4880001	4900000	10	5300001	5320000	-0.859469
10	4860001	4880000	10	5320001	5340000	-0.823568
10	45760001	45780000	10	45920001	45940000	0.615207
10	45740001	45760000	10	46140001	46160000	0.657815
10	45740001	45760000	10	46120001	46140000	0.657513
10	44080001	44100000	10	45440001	45460000	0.701828
10	43640001	43660000	10	43940001	43960000	0.609347
10	43240001	43260000	10	43600001	43620000	-0.741796
10	3480001	3500000	10	3800001	3820000	-0.8002
10	32540001	32560000	10	33420001	33440000	0.720521
10	32320001	32340000	10	32560001	32580000	-0.726631
10	32140001	32160000	10	32300001	32320000	-0.727848
10	32140001	32160000	10	32280001	32300000	-0.735301
10	29920001	29940000	10	30000001	30020000	0.630072
10	28940001	28960000	10	29600001	29620000	-0.672717
10	28940001	28960000	10	29280001	29300000	-0.638971
10	28940001	28960000	10	29260001	29280000	-0.661958
10	28460001	28480000	10	28660001	28680000	0.848933
10	28020001	28040000	10	28600001	28620000	0.608931
10	27440001	27460000	10	27520001	27540000	-0.61382
10	27020001	27040000	10	27140001	27160000	-0.712287
10	27000001	27020000	10	27160001	27180000	-0.629298
10	27000001	27020000	10	27140001	27160000	-0.605587
10	26980001	27000000	10	27140001	27160000	-0.601673
10	26900001	26920000	10	27160001	27180000	-0.623612
10	26600001	26620000	10	27580001	27600000	-0.626299
10	24900001	24920000	10	25000001	25020000	0.645851
10	22520001	22540000	10	22700001	22720000	0.719913
10	22520001	22540000	10	22620001	22640000	0.746167
10	22520001	22540000	10	22600001	22620000	0.700486
10	22400001	22420000	10	22660001	22680000	-0.6686
10	22400001	22420000	10	22560001	22580000	-0.672024
10	22280001	22300000	10	22600001	22620000	-0.680746
10	21820001	21840000	10	22400001	22420000	0.627914
9	15280001	15300000	9	15400001	15420000	-0.639235
9	14600001	14620000	9	14760001	14780000	-0.770713
9	136900001	136920000	9	137280001	137300000	0.699909
9	136660001	136680000	9	136860001	136880000	-0.622206
9	136640001	136660000	9	136860001	136880000	-0.656761
9	136640001	136660000	9	136840001	136860000	-0.615101
9	134660001	134680000	9	134980001	135000000	-0.796096
9	134640001	134660000	9	135120001	135140000	-0.629961
9	134620001	134640000	9	135120001	135140000	-0.653516
9	134060001	134080000	9	134180001	134200000	-0.604023
9	134040001	134060000	9	134200001	134220000	-0.625878
9	134020001	134040000	9	135160001	135180000	-0.605251
9	133340001	133360000	9	133540001	133560000	-0.641446
9	133320001	133340000	9	133540001	133560000	-0.662086
9	132860001	132880000	9	133000001	133020000	-0.719619
9	132860001	132880000	9	132980001	133000000	-0.677215
9	131880001	131900000	9	132820001	132840000	0.641104
9	127360001	127380000	9	127480001	127500000	-0.63796
9	123860001	123880000	9	123940001	123960000	-0.821075
9	123840001	123860000	9	123940001	123960000	-0.831111
9	123720001	123740000	9	123820001	123840000	-0.76315
9	121920001	121940000	9	122240001	122260000	0.759257
9	117260001	117280000	9	117400001	117420000	-0.603894
9	113340001	113360000	9	113980001	114000000	-0.719926
9	112660001	112680000	9	112820001	112840000	-0.609598
9	112660001	112680000	9	112800001	112820000	-0.618256
9	111260001	111280000	9	111420001	111440000	0.62269
9	110040001	110060000	9	111700001	111720000	0.676656
9	109340001	109360000	9	109540001	109560000	-0.838895
9	107620001	107640000	9	108480001	108500000	-0.713295
9	103480001	103500000	9	104060001	104080000	-0.641095
9	103460001	103480000	9	104060001	104080000	-0.636783
9	102800001	102820000	9	102960001	102980000	-0.799678
9	102780001	102800000	9	102980001	103000000	-0.784609
9	102780001	102800000	9	102960001	102980000	-0.7805
9	102560001	102580000	9	102980001	103000000	-0.670597
9	101980001	102000000	9	103080001	103100000	-0.607731
9	101960001	101980000	9	102960001	102980000	-0.693112
9	101760001	101780000	9	101900001	101920000	-0.70772
9	101760001	101780000	9	101880001	101900000	-0.754223
9	101740001	101760000	9	101900001	101920000	-0.678713
9	99540001	99560000	9	100420001	100440000	0.634733
9	98260001	98280000	9	98640001	98660000	0.753517
9	98260001	98280000	9	98620001	98640000	0.736689
9	98260001	98280000	9	98480001	98500000	0.68485
9	98240001	98260000	9	98640001	98660000	0.653661
9	98140001	98160000	9	98960001	98980000	-0.748055
9	98120001	98140000	9	98960001	98980000	-0.720594
9	95900001	95920000	9	96060001	96080000	-0.636657
9	94900001	94920000	9	95200001	95220000	-0.749045
9	94900001	94920000	9	95180001	95200000	-0.76103
9	94880001	94900000	9	95380001	95400000	-0.606236
9	94880001	94900000	9	95180001	95200000	-0.800947
9	94220001	94240000	9	94420001	94440000	-0.691677
9	93160001	93180000	9	93500001	93520000	-0.661928
9	92220001	92240000	9	92700001	92720000	-0.819086
9	91980001	92000000	9	92960001	92980000	-0.690203
9	91980001	92000000	9	92860001	92880000	-0.757532
9	91980001	92000000	9	92840001	92860000	-0.760285
9	91940001	91960000	9	92860001	92880000	-0.627951
9	91900001	91920000	9	92980001	93000000	-0.765933
9	86560001	86580000	9	86900001	86920000	-0.691892
9	86560001	86580000	9	86780001	86800000	-0.730088
9	86540001	86560000	9	86920001	86940000	-0.790091
9	86540001	86560000	9	86900001	86920000	-0.803201
9	86540001	86560000	9	86860001	86880000	-0.790597
9	86540001	86560000	9	86780001	86800000	-0.710822
9	79020001	79040000	9	79780001	79800000	0.643917
9	79020001	79040000	9	79760001	79780000	0.623105
9	75820001	75840000	9	77340001	77360000	-0.610125
9	74400001	74420000	9	75740001	75760000	0.630378
9	74400001	74420000	9	74960001	74980000	0.645081
9	74380001	74400000	9	74980001	75000000	0.741363
9	74380001	74400000	9	74960001	74980000	0.676459
9	73240001	73260000	9	73860001	73880000	-0.601652
9	72700001	72720000	9	73480001	73500000	0.7632
9	72360001	72380000	9	73020001	73040000	0.725739
9	72020001	72040000	9	72520001	72540000	-0.690785
9	72020001	72040000	9	72500001	72520000	-0.733765
9	71660001	71680000	9	71800001	71820000	-0.656314
9	71640001	71660000	9	71800001	71820000	-0.647141
9	71200001	71220000	9	71800001	71820000	-0.641604
9	71200001	71220000	9	71780001	71800000	-0.607433
9	71200001	71220000	9	71620001	71640000	-0.6827
9	71200001	71220000	9	71600001	71620000	-0.677094
9	71180001	71200000	9	71620001	71640000	-0.731217
9	71180001	71200000	9	71600001	71620000	-0.710683
9	37900001	37920000	9	38060001	38080000	-0.620536
9	35120001	35140000	9	35560001	35580000	-0.674808
9	35120001	35140000	9	35540001	35560000	-0.787077
9	35120001	35140000	9	35460001	35480000	-0.673866
9	35100001	35120000	9	35460001	35480000	-0.756672
9	3240001	3260000	9	3440001	3460000	-0.729647
9	3240001	3260000	9	3420001	3440000	-0.610509
9	32380001	32400000	9	32980001	33000000	-0.641889
9	32380001	32400000	9	32960001	32980000	-0.636352
9	32360001	32380000	9	32960001	32980000	-0.616376
9	27320001	27340000	9	27520001	27540000	-0.602051
9	26740001	26760000	9	26980001	27000000	-0.905599
9	26740001	26760000	9	26960001	26980000	-0.930278
9	26720001	26740000	9	26980001	27000000	-0.838529
9	21800001	21820000	9	22020001	22040000	0.729437
9	21800001	21820000	9	22000001	22020000	0.751595
9	21800001	21820000	9	21980001	22000000	0.785285
8	18060001	18080000	8	18640001	18660000	-0.826294
8	18040001	18060000	8	18640001	18660000	-0.827887
8	17080001	17100000	8	17920001	17940000	0.662723
8	16640001	16660000	8	17000001	17020000	-0.704235
8	16640001	16660000	8	16980001	17000000	-0.719524
8	16620001	16640000	8	17000001	17020000	-0.694519
8	146080001	146100000	8	146220001	146240000	0.791899
8	146080001	146100000	8	146200001	146220000	0.817236
8	146060001	146080000	8	146220001	146240000	0.850372
8	146060001	146080000	8	146200001	146220000	0.868462
8	146040001	146060000	8	146220001	146240000	0.859816
8	145760001	145780000	8	145940001	145960000	0.854965
8	144460001	144480000	8	144620001	144640000	0.698393
8	144460001	144480000	8	144600001	144620000	0.73153
8	144460001	144480000	8	144580001	144600000	0.711249
8	144220001	144240000	8	144300001	144320000	0.642098
8	144200001	144220000	8	144340001	144360000	0.671631
8	144200001	144220000	8	144320001	144340000	0.637615
8	143940001	143960000	8	144120001	144140000	0.653519
8	142200001	142220000	8	142440001	142460000	0.665667
8	142200001	142220000	8	142340001	142360000	0.868909
8	142180001	142200000	8	142440001	142460000	0.646198
8	142180001	142200000	8	142340001	142360000	0.848648
8	134500001	134520000	8	134640001	134660000	0.697314
8	134500001	134520000	8	134580001	134600000	0.772672
8	134500001	134520000	8	134560001	134580000	0.714591
8	132040001	132060000	8	132800001	132820000	-0.662462
8	131160001	131180000	8	131520001	131540000	-0.649804
8	131140001	131160000	8	131520001	131540000	-0.650388
8	131120001	131140000	8	131680001	131700000	-0.60709
8	130820001	130840000	8	130900001	130920000	-0.626599
8	128760001	128780000	8	129820001	129840000	-0.74214
8	128740001	128760000	8	129860001	129880000	-0.778749
8	128720001	128740000	8	129860001	129880000	-0.720324
8	126140001	126160000	8	126640001	126660000	-0.770502
8	126120001	126140000	8	127560001	127580000	-0.601061
8	126120001	126140000	8	127380001	127400000	-0.932023
8	126120001	126140000	8	127280001	127300000	-0.742032
8	126120001	126140000	8	126700001	126720000	-0.780872
8	126120001	126140000	8	126680001	126700000	-0.781629
8	126120001	126140000	8	126660001	126680000	-0.778796
8	126120001	126140000	8	126640001	126660000	-0.812202
8	126100001	126120000	8	127560001	127580000	-0.631276
8	125040001	125060000	8	125420001	125440000	-0.811754
8	124540001	124560000	8	125440001	125460000	0.661121
8	123800001	123820000	8	125460001	125480000	0.61053
8	117800001	117820000	8	118040001	118060000	-0.719008
8	117780001	117800000	8	118040001	118060000	-0.620125
8	109460001	109480000	8	110540001	110560000	0.633388
8	109460001	109480000	8	110340001	110360000	0.685157
8	109440001	109460000	8	110540001	110560000	0.648206
8	109060001	109080000	8	109500001	109520000	-0.716846
8	108280001	108300000	8	108600001	108620000	0.676466
8	108080001	108100000	8	108520001	108540000	0.671768
8	104300001	104320000	8	104380001	104400000	0.688627
8	99700001	99720000	8	101120001	101140000	-0.620138
8	99560001	99580000	8	101120001	101140000	-0.627343
8	99180001	99200000	8	99480001	99500000	-0.609304
8	91640001	91660000	8	92080001	92100000	0.850374
8	91640001	91660000	8	92060001	92080000	0.8644
8	85520001	85540000	8	85640001	85660000	0.749301
8	81940001	81960000	8	82040001	82060000	0.65534
8	79400001	79420000	8	79520001	79540000	0.60682
8	70840001	70860000	8	71000001	71020000	-0.711703
8	67360001	67380000	8	67820001	67840000	0.693771
8	65480001	65500000	8	66460001	66480000	-0.802834
8	65460001	65480000	8	66460001	66480000	-0.84595
8	6440001	6460000	8	6620001	6640000	-0.700314
8	6280001	6300000	8	6440001	6460000	-0.760639
8	6280001	6300000	8	6420001	6440000	-0.764289
8	62620001	62640000	8	63940001	63960000	-0.701923
8	58340001	58360000	8	59420001	59440000	-0.622305
8	57120001	57140000	8	57880001	57900000	-0.606065
8	54520001	54540000	8	55080001	55100000	-0.802382
8	53880001	53900000	8	54900001	54920000	-0.68437
8	53880001	53900000	8	54720001	54740000	-0.648685
8	53860001	53880000	8	54780001	54800000	-0.669923
8	53860001	53880000	8	54760001	54780000	-0.61071
8	53860001	53880000	8	54720001	54740000	-0.689253
8	53860001	53880000	8	54700001	54720000	-0.623946
8	51680001	51700000	8	51920001	51940000	0.73736
8	49600001	49620000	8	49900001	49920000	0.90612
8	41900001	41920000	8	41980001	42000000	0.812124
8	41860001	41880000	8	42000001	42020000	0.815279
8	41840001	41860000	8	42000001	42020000	0.751823
8	41840001	41860000	8	41980001	42000000	0.754964
8	39260001	39280000	8	39340001	39360000	-0.72382
8	39240001	39260000	8	39360001	39380000	-0.704883
8	39200001	39220000	8	39400001	39420000	-0.605049
8	33160001	33180000	8	33420001	33440000	-0.765492
8	32380001	32400000	8	32940001	32960000	-0.650499
8	31100001	31120000	8	32960001	32980000	-0.660313
8	31100001	31120000	8	32940001	32960000	-0.697578
8	30520001	30540000	8	31020001	31040000	-0.618233
8	28740001	28760000	8	28900001	28920000	-0.86423
8	26520001	26540000	8	27460001	27480000	-0.639174
8	23320001	23340000	8	23540001	23560000	-0.760788
8	21780001	21800000	8	22000001	22020000	0.81497
8	21780001	21800000	8	21980001	22000000	0.757887
8	21760001	21780000	8	22000001	22020000	0.758755
8	21760001	21780000	8	21980001	22000000	0.668561
8	21760001	21780000	8	21960001	21980000	0.713052
8	21760001	21780000	8	21920001	21940000	0.73275
8	2040001	2060000	8	2120001	2140000	0.661058
7	19780001	19800000	7	20340001	20360000	-0.647424
7	19760001	19780000	7	20620001	20640000	-0.608002
7	19740001	19760000	7	20620001	20640000	-0.621634
7	16440001	16460000	7	16680001	16700000	0.736375
7	156760001	156780000	7	157560001	157580000	-0.685499
7	155640001	155660000	7	156220001	156240000	-0.659592
7	155600001	155620000	7	156600001	156620000	-0.606641
7	155600001	155620000	7	156480001	156500000	-0.639155
7	155600001	155620000	7	156380001	156400000	-0.789588
7	155600001	155620000	7	156260001	156280000	-0.613025
7	155600001	155620000	7	156240001	156260000	-0.605292
7	155580001	155600000	7	156600001	156620000	-0.610503
7	155420001	155440000	7	156920001	156940000	-0.620505
7	155260001	155280000	7	156800001	156820000	-0.722601
7	155240001	155260000	7	156800001	156820000	-0.741608
7	155240001	155260000	7	155580001	155600000	-0.720867
7	151900001	151920000	7	152380001	152400000	-0.631103
7	151060001	151080000	7	151140001	151160000	0.666785
7	151040001	151060000	7	151140001	151160000	0.681634
7	151000001	151020000	7	151140001	151160000	0.69526
7	150260001	150280000	7	150420001	150440000	-0.621104
7	150240001	150260000	7	150420001	150440000	-0.605966
7	148480001	148500000	7	148640001	148660000	-0.651475
7	148400001	148420000	7	148640001	148660000	-0.635257
7	148380001	148400000	7	148640001	148660000	-0.644035
7	148260001	148280000	7	148500001	148520000	-0.734989
7	138780001	138800000	7	139020001	139040000	-0.643212
7	138760001	138780000	7	138900001	138920000	-0.713449
7	138420001	138440000	7	138560001	138580000	0.623785
7	137340001	137360000	7	137700001	137720000	-0.64505
7	137340001	137360000	7	137560001	137580000	-0.739813
7	137320001	137340000	7	137580001	137600000	-0.714167
7	129880001	129900000	7	130420001	130440000	-0.649837
7	128540001	128560000	7	128720001	128740000	-0.668016
7	12240001	12260000	7	12320001	12340000	0.871365
7	12100001	12120000	7	12360001	12380000	0.715909
7	12100001	12120000	7	12340001	12360000	0.720746
7	120600001	120620000	7	121020001	121040000	0.645412
7	11460001	11480000	7	12520001	12540000	-0.687126
7	11460001	11480000	7	12360001	12380000	-0.616184
7	114560001	114580000	7	114640001	114660000	0.811241
7	114540001	114560000	7	114640001	114660000	0.797964
7	114500001	114520000	7	114860001	114880000	0.757981
7	114500001	114520000	7	114840001	114860000	0.747089
7	112580001	112600000	7	112740001	112760000	0.773603
7	112560001	112580000	7	112760001	112780000	0.685204
7	112560001	112580000	7	112740001	112760000	0.662969
7	112420001	112440000	7	112560001	112580000	0.605071
7	106420001	106440000	7	107520001	107540000	0.742116
7	106420001	106440000	7	107500001	107520000	0.781559
7	105500001	105520000	7	105660001	105680000	-0.758583
7	104780001	104800000	7	105060001	105080000	-0.608317
7	104760001	104780000	7	104960001	104980000	-0.604767
7	103860001	103880000	7	104520001	104540000	-0.624381
7	1020001	1040000	7	1200001	1220000	0.612067
7	101340001	101360000	7	101880001	101900000	-0.696208
7	101240001	101260000	7	101880001	101900000	-0.780777
7	101220001	101240000	7	101900001	101920000	-0.788835
7	101220001	101240000	7	101880001	101900000	-0.776932
7	101200001	101220000	7	101900001	101920000	-0.782226
7	101200001	101220000	7	101880001	101900000	-0.768097
7	101180001	101200000	7	101900001	101920000	-0.782261
7	101160001	101180000	7	101900001	101920000	-0.750929
7	100500001	100520000	7	100920001	100940000	-0.696537
7	100060001	100080000	7	100300001	100320000	-0.672108
7	95540001	95560000	7	96700001	96720000	-0.617524
7	95520001	95540000	7	96680001	96700000	-0.610499
7	88400001	88420000	7	90060001	90080000	-0.676875
7	88400001	88420000	7	90040001	90060000	-0.655325
7	820001	840000	7	900001	920000	0.620939
7	8060001	8080000	7	8200001	8220000	-0.793221
7	8020001	8040000	7	8200001	8220000	-0.609029
7	77280001	77300000	7	77400001	77420000	-0.687733
7	70300001	70320000	7	71180001	71200000	-0.660992
7	70280001	70300000	7	71180001	71200000	-0.6261
7	69320001	69340000	7	69660001	69680000	0.679258
7	68520001	68540000	7	68680001	68700000	-0.644491
7	55500001	55520000	7	55660001	55680000	0.608748
7	55500001	55520000	7	55640001	55660000	0.639603
7	55480001	55500000	7	55660001	55680000	0.61916
7	55440001	55460000	7	55660001	55680000	0.730834
7	55420001	55440000	7	56140001	56160000	0.753664
7	54820001	54840000	7	56120001	56140000	0.600083
7	52960001	52980000	7	53360001	53380000	0.791715
7	5280001	5300000	7	5500001	5520000	-0.611904
7	40960001	40980000	7	41460001	41480000	-0.818452
7	40360001	40380000	7	41740001	41760000	-0.774537
7	40260001	40280000	7	41740001	41760000	-0.839677
7	380001	400000	7	660001	680000	0.632467
7	380001	400000	7	640001	660000	0.635463
7	360001	380000	7	660001	680000	0.67386
7	33220001	33240000	7	33940001	33960000	-0.664986
7	33200001	33220000	7	33940001	33960000	-0.794927
7	32520001	32540000	7	32940001	32960000	0.629582
7	31420001	31440000	7	31660001	31680000	0.673665
7	30320001	30340000	7	30380001	30400000	-0.651159
7	29820001	29840000	7	30820001	30840000	-0.944152
7	29240001	29260000	7	29440001	29460000	-0.700274
7	29220001	29240000	7	29440001	29460000	-0.696788
7	29140001	29160000	7	29440001	29460000	-0.781216
7	29120001	29140000	7	29440001	29460000	-0.792337
7	29020001	29040000	7	29460001	29480000	-0.627605
7	28960001	28980000	7	29440001	29460000	-0.60729
7	28960001	28980000	7	29140001	29160000	-0.692699
7	28960001	28980000	7	29120001	29140000	-0.694657
7	28940001	28960000	7	29440001	29460000	-0.607951
7	26300001	26320000	7	27880001	27900000	-0.666697
7	26060001	26080000	7	27100001	27120000	-0.661394
7	25920001	25940000	7	26880001	26900000	-0.600872
7	25280001	25300000	7	27200001	27220000	0.841159
7	24600001	24620000	7	25120001	25140000	0.634072
7	22880001	22900000	7	23540001	23560000	0.766401
7	22140001	22160000	7	22520001	22540000	-0.813718
6	180001	200000	6	700001	720000	-0.717354
6	180001	200000	6	400001	420000	-0.630867
6	180001	200000	6	380001	400000	-0.622769
6	18860001	18880000	6	19340001	19360000	-0.680222
6	17160001	17180000	6	17560001	17580000	-0.815741
6	17140001	17160000	6	18480001	18500000	-0.654004
6	17140001	17160000	6	18100001	18120000	-0.850849
6	17140001	17160000	6	17820001	17840000	-0.855288
6	17140001	17160000	6	17800001	17820000	-0.862212
6	17140001	17160000	6	17560001	17580000	-0.8039
6	161340001	161360000	6	161780001	161800000	-0.696127
6	155000001	155020000	6	155480001	155500000	-0.681669
6	155000001	155020000	6	155460001	155480000	-0.62893
6	152460001	152480000	6	152580001	152600000	-0.608681
6	152460001	152480000	6	152560001	152580000	-0.653531
6	152000001	152020000	6	152580001	152600000	-0.613107
6	152000001	152020000	6	152560001	152580000	-0.60919
6	151780001	151800000	6	153300001	153320000	0.650378
6	151760001	151780000	6	153300001	153320000	0.612529
6	151720001	151740000	6	153300001	153320000	0.709718
6	151700001	151720000	6	153300001	153320000	0.676972
6	150740001	150760000	6	151120001	151140000	-0.684745
6	150720001	150740000	6	151120001	151140000	-0.656002
6	141760001	141780000	6	141860001	141880000	0.913356
6	141660001	141680000	6	141860001	141880000	0.721613
6	141620001	141640000	6	141880001	141900000	0.696518
6	139560001	139580000	6	139660001	139680000	0.64733
6	139540001	139560000	6	139660001	139680000	0.626706
6	139400001	139420000	6	140240001	140260000	0.645024
6	139120001	139140000	6	139520001	139540000	0.739432
6	13900001	13920000	6	15620001	15640000	-0.64033
6	139100001	139120000	6	139520001	139540000	0.630183
6	138320001	138340000	6	139080001	139100000	0.708198
6	135460001	135480000	6	135740001	135760000	-0.686015
6	135460001	135480000	6	135720001	135740000	-0.732132
6	135440001	135460000	6	135740001	135760000	-0.680033
6	134480001	134500000	6	135460001	135480000	0.706139
6	132980001	133000000	6	133080001	133100000	-0.632099
6	132840001	132860000	6	134400001	134420000	0.83343
6	132840001	132860000	6	134380001	134400000	0.79838
6	132840001	132860000	6	134240001	134260000	0.625001
6	131240001	131260000	6	132220001	132240000	0.732046
6	130440001	130460000	6	130520001	130540000	0.728851
6	130420001	130440000	6	130560001	130580000	0.725153
6	130400001	130420000	6	130580001	130600000	0.745768
6	130380001	130400000	6	130600001	130620000	0.720785
6	130380001	130400000	6	130580001	130600000	0.732475
6	130360001	130380000	6	130600001	130620000	0.667081
6	130360001	130380000	6	130580001	130600000	0.688742
6	129920001	129940000	6	130060001	130080000	0.653572
6	129800001	129820000	6	130060001	130080000	0.694988
6	129800001	129820000	6	130040001	130060000	0.777871
6	12900001	12920000	6	13320001	13340000	-0.801575
6	128200001	128220000	6	128280001	128300000	0.616985
6	128180001	128200000	6	128280001	128300000	0.612382
6	118600001	118620000	6	119280001	119300000	0.710246
6	118600001	118620000	6	119260001	119280000	0.875242
6	118600001	118620000	6	119080001	119100000	0.722673
6	118600001	118620000	6	119060001	119080000	0.71736
6	118600001	118620000	6	118920001	118940000	0.617768
6	11660001	11680000	6	12600001	12620000	-0.816589
6	11640001	11660000	6	12880001	12900000	-0.632865
6	11640001	11660000	6	12860001	12880000	-0.634715
6	11640001	11660000	6	12600001	12620000	-0.810495
6	11620001	11640000	6	12880001	12900000	-0.694409
6	11620001	11640000	6	12620001	12640000	-0.782428
6	11620001	11640000	6	12600001	12620000	-0.783708
6	11620001	11640000	6	12580001	12600000	-0.778971
6	11620001	11640000	6	12480001	12500000	-0.656025
6	11600001	11620000	6	12620001	12640000	-0.79048
6	11580001	11600000	6	12880001	12900000	-0.627589
6	110020001	110040000	6	110700001	110720000	-0.630623
6	109840001	109860000	6	110700001	110720000	-0.780613
6	109680001	109700000	6	109780001	109800000	0.70836
6	108420001	108440000	6	108840001	108860000	-0.6588
6	108420001	108440000	6	108820001	108840000	-0.713749
6	10500001	10520000	6	10780001	10800000	-0.637291
6	99940001	99960000	6	100020001	100040000	0.747382
6	97940001	97960000	6	99560001	99580000	-0.633138
6	96960001	96980000	6	97360001	97380000	0.898656
6	96960001	96980000	6	97340001	97360000	0.868147
6	95460001	95480000	6	95640001	95660000	0.716772
6	91000001	91020000	6	91100001	91120000	0.644955
6	90980001	91000000	6	91100001	91120000	0.642406
6	90920001	90940000	6	90980001	91000000	0.687113
6	90900001	90920000	6	90980001	91000000	0.691463
6	90660001	90680000	6	90900001	90920000	0.610821
6	90660001	90680000	6	90880001	90900000	0.623182
6	86060001	86080000	6	86200001	86220000	0.624937
6	86000001	86020000	6	86200001	86220000	0.756484
6	83920001	83940000	6	84220001	84240000	-0.612885
6	83900001	83920000	6	84940001	84960000	0.791335
6	83900001	83920000	6	84920001	84940000	0.749515
6	83760001	83780000	6	84920001	84940000	0.705268
6	82960001	82980000	6	84220001	84240000	-0.607036
6	81740001	81760000	6	82040001	82060000	-0.775
6	8080001	8100000	6	8420001	8440000	0.828843
6	80820001	80840000	6	82460001	82480000	-0.729873
6	80800001	80820000	6	82460001	82480000	-0.723184
6	80700001	80720000	6	82440001	82460000	-0.612617
6	8060001	8080000	6	8440001	8460000	0.847847
6	8060001	8080000	6	8420001	8440000	0.88147
6	79780001	79800000	6	79940001	79960000	0.723008
6	79760001	79780000	6	79940001	79960000	0.613736
6	780001	800000	6	1400001	1420000	-0.645478
6	7900001	7920000	6	8060001	8080000	-0.805977
6	77960001	77980000	6	78800001	78820000	0.706717
6	74800001	74820000	6	75900001	75920000	-0.754885
6	74780001	74800000	6	75900001	75920000	-0.707399
6	66020001	66040000	6	66140001	66160000	0.76996
6	6560001	6580000	6	6640001	6660000	0.615637
6	5800001	5820000	6	5880001	5900000	-0.717853
6	5680001	5700000	6	5820001	5840000	-0.644082
6	5480001	5500000	6	5880001	5900000	-0.631635
6	5480001	5500000	6	5840001	5860000	-0.603489
6	5460001	5480000	6	6000001	6020000	-0.619519
6	5460001	5480000	6	5980001	6000000	-0.629673
6	5460001	5480000	6	5900001	5920000	-0.611249
6	5460001	5480000	6	5880001	5900000	-0.620499
6	5120001	5140000	6	6040001	6060000	-0.821608
6	50780001	50800000	6	51900001	51920000	-0.732304
6	50780001	50800000	6	51880001	51900000	-0.709963
6	50760001	50780000	6	51880001	51900000	-0.750591
6	49480001	49500000	6	49800001	49820000	-0.640143
6	48060001	48080000	6	48740001	48760000	-0.714682
6	46060001	46080000	6	46360001	46380000	-0.775044
6	46040001	46060000	6	46380001	46400000	-0.738504
6	46040001	46060000	6	46360001	46380000	-0.760953
6	45920001	45940000	6	46360001	46380000	-0.728083
6	45900001	45920000	6	46360001	46380000	-0.724782
6	44440001	44460000	6	46360001	46380000	-0.742658
6	41680001	41700000	6	43580001	43600000	0.635223
6	400001	420000	6	520001	540000	-0.611279
6	40300001	40320000	6	40540001	40560000	-0.622151
6	39320001	39340000	6	41000001	41020000	-0.652385
6	39320001	39340000	6	40260001	40280000	-0.628252
6	39300001	39320000	6	40980001	41000000	-0.639982
6	39120001	39140000	6	39260001	39280000	-0.660428
6	380001	400000	6	520001	540000	-0.605535
6	38820001	38840000	6	39280001	39300000	-0.604536
6	38820001	38840000	6	39260001	39280000	-0.609475
6	37760001	37780000	6	38440001	38460000	-0.754549
6	37740001	37760000	6	38460001	38480000	-0.781338
6	37720001	37740000	6	38460001	38480000	-0.792186
6	37720001	37740000	6	38440001	38460000	-0.770745
6	37700001	37720000	6	38460001	38480000	-0.783779
6	37680001	37700000	6	38460001	38480000	-0.781967
6	37440001	37460000	6	37520001	37540000	-0.650355
6	36740001	36760000	6	37180001	37200000	-0.629829
6	36720001	36740000	6	37180001	37200000	-0.629163
6	35280001	35300000	6	35560001	35580000	0.635915
6	35260001	35280000	6	35600001	35620000	0.687741
6	35260001	35280000	6	35580001	35600000	0.630621
6	35260001	35280000	6	35560001	35580000	0.668455
6	35260001	35280000	6	35540001	35560000	0.616003
6	33440001	33460000	6	33960001	33980000	0.73146
6	3000001	3020000	6	4120001	4140000	0.743932
6	3000001	3020000	6	4020001	4040000	0.617237
6	2980001	3000000	6	4020001	4040000	0.713406
6	2980001	3000000	6	3240001	3260000	0.63835
6	29820001	29840000	6	29980001	30000000	-0.693664
6	29800001	29820000	6	29980001	30000000	-0.746969
6	29800001	29820000	6	29960001	29980000	-0.658304
6	29680001	29700000	6	29920001	29940000	-0.677071
6	29680001	29700000	6	29900001	29920000	-0.722989
6	29680001	29700000	6	29800001	29820000	-0.749418
6	2880001	2900000	6	4020001	4040000	0.641734
6	27780001	27800000	6	27840001	27860000	0.616595
6	27760001	27780000	6	27840001	27860000	0.615043
6	27520001	27540000	6	28740001	28760000	-0.698188
6	27240001	27260000	6	28760001	28780000	-0.64343
6	27240001	27260000	6	28740001	28760000	-0.674242
6	27240001	27260000	6	28720001	28740000	-0.661263
6	27120001	27140000	6	27840001	27860000	0.612084
6	27100001	27120000	6	27860001	27880000	0.70076
6	27100001	27120000	6	27840001	27860000	0.613088
6	26180001	26200000	6	26280001	26300000	0.672634
6	24920001	24940000	6	25000001	25020000	0.632247
6	24920001	24940000	6	24980001	25000000	0.633007
6	24900001	24920000	6	25000001	25020000	0.6205
6	24900001	24920000	6	24980001	25000000	0.63355
6	24880001	24900000	6	25000001	25020000	0.62083
6	24860001	24880000	6	25000001	25020000	0.603433
6	24840001	24860000	6	25000001	25020000	0.60062
6	2200001	2220000	6	2640001	2660000	-0.646269
6	20780001	20800000	6	21580001	21600000	-0.693356
6	20100001	20120000	6	20520001	20540000	-0.714661
6	20080001	20100000	6	21560001	21580000	-0.749854
6	20080001	20100000	6	20520001	20540000	-0.769458
6	20080001	20100000	6	20500001	20520000	-0.79903
5	18640001	18660000	5	18820001	18840000	0.643686
5	180340001	180360000	5	180440001	180460000	-0.658862
5	180180001	180200000	5	180440001	180460000	-0.753256
5	180180001	180200000	5	180420001	180440000	-0.764354
5	179220001	179240000	5	179500001	179520000	0.748489
5	179200001	179220000	5	179500001	179520000	0.766703
5	179120001	179140000	5	179500001	179520000	0.722213
5	179080001	179100000	5	179500001	179520000	0.812879
5	179060001	179080000	5	179500001	179520000	0.820557
5	178940001	178960000	5	179500001	179520000	0.766817
5	17200001	17220000	5	18300001	18320000	-0.68744
5	171460001	171480000	5	171700001	171720000	-0.602282
5	171440001	171460000	5	171720001	171740000	-0.659398
5	171340001	171360000	5	171680001	171700000	-0.608705
5	171340001	171360000	5	171620001	171640000	-0.645401
5	171340001	171360000	5	171460001	171480000	-0.752935
5	171320001	171340000	5	171460001	171480000	-0.743877
5	170820001	170840000	5	171720001	171740000	-0.602543
5	169640001	169660000	5	170040001	170060000	-0.622884
5	169620001	169640000	5	170040001	170060000	-0.625839
5	169540001	169560000	5	170040001	170060000	-0.641634
5	169520001	169540000	5	170060001	170080000	-0.633787
5	169520001	169540000	5	170040001	170060000	-0.652917
5	168400001	168420000	5	169000001	169020000	-0.629403
5	16780001	16800000	5	17180001	17200000	-0.642198
5	167140001	167160000	5	167640001	167660000	-0.608883
5	167140001	167160000	5	167620001	167640000	-0.622445
5	162860001	162880000	5	162940001	162960000	0.806018
5	156680001	156700000	5	157160001	157180000	0.625241
5	156660001	156680000	5	157160001	157180000	0.713704
5	156620001	156640000	5	157160001	157180000	0.90121
5	156600001	156620000	5	157160001	157180000	0.948576
5	156580001	156600000	5	157160001	157180000	0.969251
5	156580001	156600000	5	157140001	157160000	0.924538
5	156560001	156580000	5	157160001	157180000	0.954889
5	156560001	156580000	5	157140001	157160000	0.930456
5	151920001	151940000	5	153340001	153360000	-0.67767
5	151920001	151940000	5	153320001	153340000	-0.685229
5	151900001	151920000	5	153340001	153360000	-0.661094
5	151900001	151920000	5	153320001	153340000	-0.687093
5	149200001	149220000	5	149360001	149380000	-0.678825
5	147780001	147800000	5	149400001	149420000	-0.621511
5	147560001	147580000	5	148380001	148400000	-0.868926
5	147560001	147580000	5	148100001	148120000	-0.806417
5	147540001	147560000	5	148100001	148120000	-0.837697
5	145060001	145080000	5	145200001	145220000	-0.638012
5	143580001	143600000	5	145500001	145520000	-0.600784
5	143580001	143600000	5	145480001	145500000	-0.64714
5	141360001	141380000	5	141940001	141960000	0.688291
5	141360001	141380000	5	141920001	141940000	0.812764
5	140200001	140220000	5	140760001	140780000	-0.785991
5	140180001	140200000	5	140780001	140800000	-0.786007
5	139440001	139460000	5	139520001	139540000	-0.71158
5	139160001	139180000	5	139340001	139360000	-0.759795
5	138160001	138180000	5	138580001	138600000	-0.610368
5	138140001	138160000	5	138580001	138600000	-0.608113
5	137680001	137700000	5	137900001	137920000	-0.675666
5	137680001	137700000	5	137880001	137900000	-0.680983
5	137680001	137700000	5	137860001	137880000	-0.672518
5	137520001	137540000	5	137740001	137760000	-0.632234
5	134780001	134800000	5	134880001	134900000	-0.740309
5	134080001	134100000	5	134220001	134240000	-0.616871
5	133340001	133360000	5	134200001	134220000	0.61997
5	133320001	133340000	5	134220001	134240000	0.644817
5	131880001	131900000	5	132040001	132060000	-0.785616
5	131860001	131880000	5	132040001	132060000	-0.741739
5	129440001	129460000	5	130440001	130460000	-0.748045
5	129440001	129460000	5	130420001	130440000	-0.729752
5	129420001	129440000	5	130440001	130460000	-0.651818
5	128540001	128560000	5	128860001	128880000	-0.609166
5	127200001	127220000	5	127520001	127540000	-0.723654
5	125680001	125700000	5	126120001	126140000	0.714431
5	114620001	114640000	5	115400001	115420000	-0.600567
5	109020001	109040000	5	110060001	110080000	0.800284
5	10340001	10360000	5	10740001	10760000	0.602379
5	103280001	103300000	5	103400001	103420000	0.790004
5	102560001	102580000	5	102800001	102820000	-0.679147
5	101900001	101920000	5	102480001	102500000	-0.64381
5	101880001	101900000	5	102520001	102540000	-0.631135
5	96100001	96120000	5	96340001	96360000	-0.625946
5	96080001	96100000	5	96340001	96360000	-0.623886
5	95160001	95180000	5	96500001	96520000	-0.725152
5	95160001	95180000	5	95960001	95980000	-0.633348
5	95020001	95040000	5	95660001	95680000	0.669959
5	95000001	95020000	5	95660001	95680000	0.683609
5	94880001	94900000	5	94960001	94980000	0.740198
5	89740001	89760000	5	90060001	90080000	0.722593
5	89700001	89720000	5	89820001	89840000	0.687189
5	88020001	88040000	5	89680001	89700000	-0.610951
5	88020001	88040000	5	89560001	89580000	-0.629616
5	87060001	87080000	5	88020001	88040000	-0.600949
5	86560001	86580000	5	86680001	86700000	0.807096
5	85900001	85920000	5	86720001	86740000	0.62506
5	85900001	85920000	5	86700001	86720000	0.685813
5	85900001	85920000	5	86680001	86700000	0.802979
5	81460001	81480000	5	82860001	82880000	0.776708
5	79000001	79020000	5	79140001	79160000	-0.73897
5	78980001	79000000	5	79140001	79160000	-0.775267
5	78840001	78860000	5	79140001	79160000	-0.877775
5	78420001	78440000	5	78760001	78780000	-0.790158
5	73960001	73980000	5	74200001	74220000	-0.603432
5	73200001	73220000	5	74200001	74220000	-0.613738
5	73180001	73200000	5	74580001	74600000	-0.755172
5	72880001	72900000	5	73940001	73960000	-0.695788
5	72880001	72900000	5	73920001	73940000	-0.659628
5	72880001	72900000	5	73080001	73100000	-0.68869
5	72880001	72900000	5	73060001	73080000	-0.713618
5	72240001	72260000	5	72740001	72760000	0.699913
5	72240001	72260000	5	72720001	72740000	0.703154
5	72220001	72240000	5	72800001	72820000	0.608647
5	71880001	71900000	5	72760001	72780000	-0.604409
5	71600001	71620000	5	72840001	72860000	0.658773
5	70760001	70780000	5	70860001	70880000	-0.88656
5	68500001	68520000	5	68640001	68660000	-0.628764
5	68480001	68500000	5	68660001	68680000	-0.639346
5	68400001	68420000	5	68520001	68540000	-0.662521
5	68380001	68400000	5	68500001	68520000	-0.607568
5	6800001	6820000	5	7800001	7820000	-0.616429
5	67040001	67060000	5	67460001	67480000	-0.612572
5	66100001	66120000	5	66500001	66520000	-0.895849
5	65060001	65080000	5	65220001	65240000	-0.672811
5	65040001	65060000	5	65320001	65340000	-0.675832
5	65040001	65060000	5	65220001	65240000	-0.662503
5	65020001	65040000	5	65220001	65240000	-0.677667
5	64240001	64260000	5	64760001	64780000	-0.832767
5	64100001	64120000	5	64800001	64820000	-0.676767
5	64100001	64120000	5	64780001	64800000	-0.750401
5	64100001	64120000	5	64760001	64780000	-0.740027
5	64080001	64100000	5	64800001	64820000	-0.733988
5	64060001	64080000	5	64840001	64860000	-0.632834
5	63920001	63940000	5	64080001	64100000	-0.915154
5	63920001	63940000	5	64060001	64080000	-0.870832
5	6380001	6400000	5	6720001	6740000	0.814146
5	6360001	6380000	5	6740001	6760000	0.752739
5	6360001	6380000	5	6720001	6740000	0.757866
5	6360001	6380000	5	6700001	6720000	0.709033
5	60340001	60360000	5	60580001	60600000	-0.629893
5	59180001	59200000	5	59340001	59360000	0.801335
5	59100001	59120000	5	59940001	59960000	-0.715137
5	58680001	58700000	5	59100001	59120000	-0.706748
5	58680001	58700000	5	59080001	59100000	-0.700221
5	58480001	58500000	5	59080001	59100000	-0.631038
5	58480001	58500000	5	58940001	58960000	-0.780392
5	52760001	52780000	5	53520001	53540000	-0.619055
5	51160001	51180000	5	51380001	51400000	0.640005
5	50900001	50920000	5	51380001	51400000	0.828691
5	42940001	42960000	5	43060001	43080000	0.834501
5	42940001	42960000	5	43040001	43060000	0.774401
5	42920001	42940000	5	43060001	43080000	0.866417
5	42920001	42940000	5	43040001	43060000	0.795828
5	42900001	42920000	5	43300001	43320000	0.608746
5	42900001	42920000	5	43100001	43120000	0.896369
5	42900001	42920000	5	43000001	43020000	0.704062
5	41880001	41900000	5	43300001	43320000	0.716889
5	41880001	41900000	5	43100001	43120000	0.750784
5	41740001	41760000	5	42100001	42120000	-0.975697
5	39700001	39720000	5	40720001	40740000	-0.615476
5	38960001	38980000	5	39120001	39140000	-0.745111
5	38960001	38980000	5	39100001	39120000	-0.73678
5	38940001	38960000	5	39120001	39140000	-0.733776
5	37020001	37040000	5	37340001	37360000	-0.617093
5	37020001	37040000	5	37320001	37340000	-0.658452
5	36880001	36900000	5	36960001	36980000	-0.726285
5	35440001	35460000	5	35920001	35940000	-0.708796
5	31520001	31540000	5	32600001	32620000	-0.666701
5	31520001	31540000	5	32580001	32600000	-0.698134
5	31500001	31520000	5	32600001	32620000	-0.708003
4	190520001	190540000	4	190640001	190660000	0.860636
4	190520001	190540000	4	190620001	190640000	0.854155
4	190500001	190520000	4	190640001	190660000	0.842989
4	187880001	187900000	4	188080001	188100000	0.759469
4	187720001	187740000	4	187880001	187900000	0.603415
4	185380001	185400000	4	185460001	185480000	-0.605371
4	185340001	185360000	4	185440001	185460000	-0.620666
4	184000001	184020000	4	184160001	184180000	-0.610762
4	183980001	184000000	4	184160001	184180000	-0.62132
4	183840001	183860000	4	184340001	184360000	0.722061
4	183840001	183860000	4	184320001	184340000	0.663308
4	183820001	183840000	4	184400001	184420000	0.727165
4	183820001	183840000	4	184340001	184360000	0.715041
4	183820001	183840000	4	184320001	184340000	0.68022
4	174200001	174220000	4	175040001	175060000	0.790859
4	174080001	174100000	4	174420001	174440000	0.824521
4	170540001	170560000	4	170940001	170960000	0.69271
4	170520001	170540000	4	170960001	170980000	0.680215
4	170520001	170540000	4	170940001	170960000	0.711088
4	170500001	170520000	4	170960001	170980000	0.818579
4	169920001	169940000	4	170940001	170960000	0.673836
4	169400001	169420000	4	170940001	170960000	0.697779
4	169220001	169240000	4	169400001	169420000	-0.620049
4	169220001	169240000	4	169380001	169400000	-0.632963
4	169200001	169220000	4	169300001	169320000	-0.6566
4	169180001	169200000	4	169360001	169380000	-0.638383
4	169180001	169200000	4	169340001	169360000	-0.642057
4	169180001	169200000	4	169320001	169340000	-0.649743
4	169160001	169180000	4	169340001	169360000	-0.634099
4	169140001	169160000	4	169360001	169380000	-0.636667
4	166020001	166040000	4	166180001	166200000	0.606454
4	164600001	164620000	4	165640001	165660000	0.645159
4	164480001	164500000	4	164680001	164700000	0.764447
4	164480001	164500000	4	164580001	164600000	0.836002
4	164460001	164480000	4	164600001	164620000	0.828137
4	164440001	164460000	4	164620001	164640000	0.906316
4	164400001	164420000	4	164600001	164620000	0.955871
4	164080001	164100000	4	164580001	164600000	0.871103
4	164080001	164100000	4	164440001	164460000	0.697374
4	164080001	164100000	4	164420001	164440000	0.619664
4	163380001	163400000	4	163640001	163660000	0.659237
4	162680001	162700000	4	162820001	162840000	0.613
4	156360001	156380000	4	156700001	156720000	-0.722564
4	156340001	156360000	4	156700001	156720000	-0.702332
4	156340001	156360000	4	156680001	156700000	-0.684704
4	153760001	153780000	4	154020001	154040000	-0.602272
4	153420001	153440000	4	153560001	153580000	-0.652419
4	153400001	153420000	4	153560001	153580000	-0.656269
4	151220001	151240000	4	151780001	151800000	-0.669447
4	151220001	151240000	4	151760001	151780000	-0.649936
4	151200001	151220000	4	151780001	151800000	-0.648737
4	151200001	151220000	4	151760001	151780000	-0.610718
4	150900001	150920000	4	151780001	151800000	-0.640194
4	147460001	147480000	4	147580001	147600000	-0.600328
4	147260001	147280000	4	147840001	147860000	-0.674931
4	147260001	147280000	4	147820001	147840000	-0.687975
4	147260001	147280000	4	147460001	147480000	-0.61119
4	147260001	147280000	4	147440001	147460000	-0.672155
4	147240001	147260000	4	147840001	147860000	-0.712472
4	147240001	147260000	4	147820001	147840000	-0.718959
4	147160001	147180000	4	147840001	147860000	-0.687042
4	147160001	147180000	4	147820001	147840000	-0.687004
4	147140001	147160000	4	147840001	147860000	-0.650235
4	138260001	138280000	4	138740001	138760000	-0.723169
4	13480001	13500000	4	13620001	13640000	0.850233
4	13460001	13480000	4	13620001	13640000	0.847415
4	13460001	13480000	4	13600001	13620000	0.658406
4	12860001	12880000	4	13540001	13560000	-0.720878
4	12840001	12860000	4	13540001	13560000	-0.673563
4	12740001	12760000	4	13540001	13560000	-0.672022
4	12720001	12740000	4	13540001	13560000	-0.64763
4	1240001	1260000	4	1320001	1340000	0.892596
4	124020001	124040000	4	125240001	125260000	-0.673756
4	124020001	124040000	4	125220001	125240000	-0.668594
4	124000001	124020000	4	125220001	125240000	-0.720429
4	122840001	122860000	4	123840001	123860000	-0.698231
4	122820001	122840000	4	123840001	123860000	-0.61841
4	120980001	121000000	4	122020001	122040000	0.610769
4	119960001	119980000	4	120200001	120220000	-0.604114
4	119680001	119700000	4	119800001	119820000	-0.750518
4	113540001	113560000	4	113680001	113700000	-0.649156
4	113240001	113260000	4	113420001	113440000	0.626393
4	113220001	113240000	4	113440001	113460000	0.614327
4	113220001	113240000	4	113420001	113440000	0.732389
4	113180001	113200000	4	113420001	113440000	0.607407
4	113140001	113160000	4	113420001	113440000	0.624848
4	1100001	1120000	4	1500001	1520000	0.642708
4	110460001	110480000	4	110580001	110600000	-0.636198
4	110460001	110480000	4	110560001	110580000	-0.642598
4	110360001	110380000	4	110480001	110500000	-0.6812
4	110360001	110380000	4	110460001	110480000	-0.690598
4	110340001	110360000	4	110480001	110500000	-0.640723
4	110340001	110360000	4	110460001	110480000	-0.654766
4	106060001	106080000	4	106380001	106400000	-0.799332
4	106040001	106060000	4	106380001	106400000	-0.810318
4	95220001	95240000	4	95320001	95340000	-0.703797
4	90160001	90180000	4	90220001	90240000	0.805665
4	89200001	89220000	4	89300001	89320000	-0.609929
4	88940001	88960000	4	89560001	89580000	-0.635714
4	88760001	88780000	4	89120001	89140000	-0.827514
4	88300001	88320000	4	88380001	88400000	-0.612656
4	78580001	78600000	4	79020001	79040000	-0.704016
4	76900001	76920000	4	76980001	77000000	-0.854452
4	76820001	76840000	4	76980001	77000000	-0.708235
4	76420001	76440000	4	76640001	76660000	-0.604179
4	75240001	75260000	4	75380001	75400000	0.639189
4	75220001	75240000	4	75380001	75400000	0.659721
4	75080001	75100000	4	75600001	75620000	0.71108
4	75080001	75100000	4	75580001	75600000	0.694705
4	75080001	75100000	4	75560001	75580000	0.668406
4	75060001	75080000	4	75580001	75600000	0.693089
4	73560001	73580000	4	73880001	73900000	-0.801474
4	68420001	68440000	4	68780001	68800000	-0.632227
4	6240001	6260000	4	6320001	6340000	0.829662
4	5520001	5540000	4	5640001	5660000	0.730826
4	53580001	53600000	4	53720001	53740000	0.655714
4	52960001	52980000	4	53080001	53100000	0.739347
4	44640001	44660000	4	44740001	44760000	0.738477
4	340001	360000	4	480001	500000	0.795856
4	340001	360000	4	460001	480000	0.758109
3	196320001	196340000	3	196400001	196420000	0.634428
3	195260001	195280000	3	195580001	195600000	0.772592
3	190960001	190980000	3	191100001	191120000	-0.641046
3	190940001	190960000	3	191100001	191120000	-0.60594
3	190720001	190740000	3	191280001	191300000	-0.841289
3	190580001	190600000	3	190720001	190740000	0.701153
3	189680001	189700000	3	190040001	190060000	-0.677298
3	189680001	189700000	3	190020001	190040000	-0.702216
3	189680001	189700000	3	189900001	189920000	-0.64734
3	189660001	189680000	3	189900001	189920000	-0.634075
3	186740001	186760000	3	186860001	186880000	-0.618172
3	186560001	186580000	3	186640001	186660000	-0.669103
3	185980001	186000000	3	186240001	186260000	-0.630827
3	185960001	185980000	3	186240001	186260000	-0.675225
3	185820001	185840000	3	186260001	186280000	-0.603682
3	185700001	185720000	3	186060001	186080000	-0.684555
3	185680001	185700000	3	185960001	185980000	-0.737684
3	185060001	185080000	3	185280001	185300000	-0.624857
3	183600001	183620000	3	184000001	184020000	-0.617857
3	183180001	183200000	3	183320001	183340000	-0.612801
3	183180001	183200000	3	183300001	183320000	-0.690035
3	182420001	182440000	3	183100001	183120000	-0.669679
3	182420001	182440000	3	182560001	182580000	-0.755785
3	182420001	182440000	3	182540001	182560000	-0.78575
3	181420001	181440000	3	182400001	182420000	-0.707347
3	181420001	181440000	3	182380001	182400000	-0.721253
3	178840001	178860000	3	178920001	178940000	-0.662382
3	176780001	176800000	3	176880001	176900000	-0.644783
3	17300001	17320000	3	17440001	17460000	-0.680795
3	17280001	17300000	3	17440001	17460000	-0.752889
3	170920001	170940000	3	171020001	171040000	-0.60989
3	170680001	170700000	3	171480001	171500000	-0.671256
3	170660001	170680000	3	172380001	172400000	-0.604202
3	170660001	170680000	3	171500001	171520000	-0.722059
3	16620001	16640000	3	17880001	17900000	-0.691965
3	160980001	161000000	3	161120001	161140000	0.600166
3	160900001	160920000	3	161120001	161140000	0.714302
3	160800001	160820000	3	161140001	161160000	0.638713
3	160800001	160820000	3	161120001	161140000	0.601971
3	160780001	160800000	3	161160001	161180000	0.700636
3	160100001	160120000	3	160280001	160300000	0.87554
3	158560001	158580000	3	158980001	159000000	-0.847327
3	158560001	158580000	3	158960001	158980000	-0.83247
3	158540001	158560000	3	158960001	158980000	-0.836016
3	157340001	157360000	3	158140001	158160000	-0.624624
3	157320001	157340000	3	158240001	158260000	-0.737849
3	157320001	157340000	3	158140001	158160000	-0.709485
3	157320001	157340000	3	158040001	158060000	-0.623816
3	154160001	154180000	3	154980001	155000000	-0.797348
3	15160001	15180000	3	15580001	15600000	-0.657273
3	151160001	151180000	3	151620001	151640000	-0.627591
3	141840001	141860000	3	142000001	142020000	-0.666863
3	141840001	141860000	3	141980001	142000000	-0.704645
3	141680001	141700000	3	142000001	142020000	-0.625182
3	141660001	141680000	3	142000001	142020000	-0.639031
3	141460001	141480000	3	141600001	141620000	-0.651256
3	141440001	141460000	3	141620001	141640000	-0.670043
3	141440001	141460000	3	141600001	141620000	-0.747347
3	141300001	141320000	3	142080001	142100000	-0.640115
3	141300001	141320000	3	142060001	142080000	-0.622214
3	141080001	141100000	3	141280001	141300000	-0.654017
3	141080001	141100000	3	141160001	141180000	-0.696888
3	138820001	138840000	3	139040001	139060000	-0.779145
3	138140001	138160000	3	139040001	139060000	-0.748627
3	138140001	138160000	3	139020001	139040000	-0.712206
3	138120001	138140000	3	139040001	139060000	-0.738703
3	132240001	132260000	3	132360001	132380000	-0.756002
3	132220001	132240000	3	133320001	133340000	-0.625662
3	132220001	132240000	3	132400001	132420000	-0.746019
3	132220001	132240000	3	132380001	132400000	-0.731211
3	132200001	132220000	3	132400001	132420000	-0.776
3	132200001	132220000	3	132380001	132400000	-0.74116
3	132180001	132200000	3	132380001	132400000	-0.709018
3	132160001	132180000	3	132400001	132420000	-0.705262
3	132160001	132180000	3	132380001	132400000	-0.684642
3	132140001	132160000	3	132420001	132440000	-0.678941
3	132140001	132160000	3	132400001	132420000	-0.696492
3	132120001	132140000	3	132420001	132440000	-0.633186
3	131100001	131120000	3	131220001	131240000	-0.632853
3	131080001	131100000	3	131220001	131240000	-0.632095
3	131040001	131060000	3	131400001	131420000	-0.698597
3	124480001	124500000	3	124620001	124640000	-0.70061
3	124480001	124500000	3	124600001	124620000	-0.754814
3	124460001	124480000	3	124620001	124640000	-0.683404
3	123040001	123060000	3	123260001	123280000	-0.825853
3	122260001	122280000	3	122380001	122400000	-0.604301
3	122120001	122140000	3	122260001	122280000	-0.633751
3	121360001	121380000	3	121440001	121460000	-0.708474
3	119220001	119240000	3	120280001	120300000	0.738128
3	11420001	11440000	3	11840001	11860000	-0.657148
3	113940001	113960000	3	115500001	115520000	0.691607
3	113920001	113940000	3	115500001	115520000	0.604174
3	112760001	112780000	3	113000001	113020000	-0.706762
3	11260001	11280000	3	11380001	11400000	-0.645241
3	110560001	110580000	3	111100001	111120000	0.8149
3	109720001	109740000	3	110000001	110020000	0.856221
3	108520001	108540000	3	108600001	108620000	0.70612
3	108200001	108220000	3	108620001	108640000	0.631991
3	107800001	107820000	3	107920001	107940000	0.646067
3	107780001	107800000	3	107920001	107940000	0.621791
3	107760001	107780000	3	108120001	108140000	0.710937
3	107640001	107660000	3	108120001	108140000	0.798408
3	106960001	106980000	3	107160001	107180000	0.791472
3	106960001	106980000	3	107140001	107160000	0.879442
3	106960001	106980000	3	107120001	107140000	0.924733
3	106940001	106960000	3	108180001	108200000	0.847143
3	106940001	106960000	3	107140001	107160000	0.826371
3	105440001	105460000	3	105560001	105580000	0.667339
3	105440001	105460000	3	105540001	105560000	0.638656
3	105420001	105440000	3	105580001	105600000	0.631359
3	105400001	105420000	3	105580001	105600000	0.787587
3	102520001	102540000	3	103100001	103120000	0.724767
3	100780001	100800000	3	101340001	101360000	-0.600427
3	99560001	99580000	3	99780001	99800000	-0.677212
3	97480001	97500000	3	98300001	98320000	0.666643
3	97480001	97500000	3	98280001	98300000	0.64437
3	9400001	9420000	3	9480001	9500000	-0.612175
3	9380001	9400000	3	9460001	9480000	-0.614731
3	73140001	73160000	3	73540001	73560000	-0.732036
3	70120001	70140000	3	71680001	71700000	-0.619284
3	69200001	69220000	3	69340001	69360000	-0.699275
3	67840001	67860000	3	68920001	68940000	0.691772
3	67840001	67860000	3	68900001	68920000	0.605982
3	66300001	66320000	3	66860001	66880000	-0.64179
3	64040001	64060000	3	64440001	64460000	-0.729528
3	64020001	64040000	3	64460001	64480000	-0.667859
3	63820001	63840000	3	64460001	64480000	-0.613827
3	63320001	63340000	3	63800001	63820000	-0.749527
3	63320001	63340000	3	63780001	63800000	-0.714246
3	60980001	61000000	3	61180001	61200000	-0.657431
3	58160001	58180000	3	58500001	58520000	-0.649504
3	57400001	57420000	3	57840001	57860000	-0.79587
3	57400001	57420000	3	57820001	57840000	-0.834197
23	17260001	17280000	23	17700001	17720000	-0.761008
23	17260001	17280000	23	17680001	17700000	-0.791397
23	16840001	16860000	23	17060001	17080000	-0.696377
23	16740001	16760000	23	16880001	16900000	0.756481
23	16720001	16740000	23	16880001	16900000	0.804055
23	15700001	15720000	23	16720001	16740000	0.640904
23	15700001	15720000	23	15820001	15840000	0.613494
23	15700001	15720000	23	15800001	15820000	0.7091
23	15700001	15720000	23	15780001	15800000	0.6959
23	15700001	15720000	23	15760001	15780000	0.627026
23	15680001	15700000	23	16800001	16820000	0.712409
23	15680001	15700000	23	15780001	15800000	0.717765
23	15680001	15700000	23	15760001	15780000	0.66686
23	15340001	15360000	23	16700001	16720000	0.610127
23	152120001	152140000	23	153200001	153220000	-0.604509
3	54560001	54580000	3	55080001	55100000	-0.915723
23	138880001	138900000	23	139000001	139020000	-0.63537
23	135640001	135660000	23	135980001	136000000	-0.6877
23	134620001	134640000	23	134700001	134720000	-0.743601
23	134600001	134620000	23	134720001	134740000	-0.867135
23	133600001	133620000	23	134040001	134060000	-0.775888
3	53340001	53360000	3	53740001	53760000	-0.720275
3	53320001	53340000	3	53740001	53760000	-0.702881
3	53240001	53260000	3	53740001	53760000	-0.65597
23	13120001	13140000	23	14040001	14060000	0.758456
23	131140001	131160000	23	131340001	131360000	0.624473
23	13100001	13120000	23	14040001	14060000	0.715371
23	13040001	13060000	23	14040001	14060000	0.625453
3	52960001	52980000	3	53080001	53100000	-0.623706
23	129460001	129480000	23	130040001	130060000	-0.639773
23	129200001	129220000	23	129320001	129340000	-0.707459
3	52880001	52900000	3	53100001	53120000	-0.715675
23	128780001	128800000	23	128960001	128980000	-0.614298
23	128760001	128780000	23	129040001	129060000	-0.661565
23	128760001	128780000	23	129020001	129040000	-0.60597
23	128740001	128760000	23	129300001	129320000	-0.668189
23	128740001	128760000	23	129160001	129180000	-0.637488
23	128740001	128760000	23	129040001	129060000	-0.725661
23	128720001	128740000	23	129340001	129360000	-0.69034
23	128720001	128740000	23	129320001	129340000	-0.624667
3	52860001	52880000	3	53100001	53120000	-0.696724
3	52780001	52800000	3	53100001	53120000	-0.667518
3	52760001	52780000	3	53220001	53240000	-0.856015
3	52760001	52780000	3	53100001	53120000	-0.619979
23	123080001	123100000	23	123160001	123180000	-0.609622
23	118700001	118720000	23	118860001	118880000	-0.634177
23	109680001	109700000	23	110080001	110100000	-0.614045
3	50460001	50480000	3	50560001	50580000	-0.63563
23	10140001	10160000	23	10680001	10700000	-0.600337
23	101400001	101420000	23	102120001	102140000	-0.673333
23	101380001	101400000	23	102100001	102120000	-0.609491
23	101320001	101340000	23	102120001	102140000	-0.606425
23	101060001	101080000	23	101200001	101220000	0.798044
23	9960001	9980000	23	11780001	11800000	0.613384
23	9960001	9980000	23	11140001	11160000	0.607764
3	49740001	49760000	3	49960001	49980000	-0.604116
3	49720001	49740000	3	49960001	49980000	-0.610478
23	94800001	94820000	23	95120001	95140000	0.906141
23	8960001	8980000	23	9300001	9320000	-0.642917
23	8960001	8980000	23	9280001	9300000	-0.688568
23	8940001	8960000	23	9280001	9300000	-0.653556
23	8760001	8780000	23	9680001	9700000	-0.743209
23	8740001	8760000	23	9860001	9880000	-0.70904
23	8740001	8760000	23	9680001	9700000	-0.711967
23	87100001	87120000	23	87300001	87320000	0.671016
23	86500001	86520000	23	86600001	86620000	0.64339
23	86360001	86380000	23	86640001	86660000	0.665928
23	85140001	85160000	23	85300001	85320000	-0.653813
23	85120001	85140000	23	85300001	85320000	-0.781921
23	85020001	85040000	23	85200001	85220000	0.813303
23	85020001	85040000	23	85140001	85160000	0.671165
23	84200001	84220000	23	84500001	84520000	-0.622339
23	84200001	84220000	23	84320001	84340000	-0.816984
23	81880001	81900000	23	82220001	82240000	0.797753
23	81460001	81480000	23	81560001	81580000	0.608713
3	47880001	47900000	3	48020001	48040000	-0.821423
3	47860001	47880000	3	48180001	48200000	-0.65493
3	47860001	47880000	3	48020001	48040000	-0.776012
23	77160001	77180000	23	77360001	77380000	0.736478
23	77140001	77160000	23	77360001	77380000	0.689567
23	77020001	77040000	23	77140001	77160000	-0.724291
23	76780001	76800000	23	77140001	77160000	-0.864858
23	73060001	73080000	23	73220001	73240000	-0.613777
23	70620001	70640000	23	70780001	70800000	-0.778937
23	70620001	70640000	23	70760001	70780000	-0.751132
23	70600001	70620000	23	70780001	70800000	-0.772251
23	70600001	70620000	23	70760001	70780000	-0.769398
3	46940001	46960000	3	47360001	47380000	-0.771508
3	46920001	46940000	3	47360001	47380000	-0.760763
3	46900001	46920000	3	47380001	47400000	-0.727065
3	46880001	46900000	3	47380001	47400000	-0.730344
23	68060001	68080000	23	68420001	68440000	-0.615483
3	46740001	46760000	3	47400001	47420000	-0.604886
3	45800001	45820000	3	45960001	45980000	-0.646526
3	45780001	45800000	3	45960001	45980000	-0.616676
23	54060001	54080000	23	54200001	54220000	-0.957112
23	51060001	51080000	23	51180001	51200000	-0.618354
3	45080001	45100000	3	45540001	45560000	-0.622935
23	46420001	46440000	23	46500001	46520000	-0.735246
23	46400001	46420000	23	46500001	46520000	-0.787553
23	46400001	46420000	23	46480001	46500000	-0.652457
3	44560001	44580000	3	44800001	44820000	-0.693672
3	44560001	44580000	3	44780001	44800000	-0.726614
23	45360001	45380000	23	45720001	45740000	-0.614239
23	45360001	45380000	23	45700001	45720000	-0.751017
23	37780001	37800000	23	38020001	38040000	-0.856348
3	43320001	43340000	3	43400001	43420000	0.600069
3	39240001	39260000	3	39320001	39340000	-0.693385
3	39220001	39240000	3	39320001	39340000	-0.704547
3	39160001	39180000	3	39320001	39340000	-0.677127
3	39140001	39160000	3	39320001	39340000	-0.622885
22	18940001	18960000	22	19560001	19580000	0.628596
22	18940001	18960000	22	19440001	19460000	0.703122
22	18940001	18960000	22	19140001	19160000	0.692648
3	38160001	38180000	3	38380001	38400000	-0.689953
3	38140001	38160000	3	38380001	38400000	-0.661128
3	38000001	38020000	3	38680001	38700000	-0.635638
22	17640001	17660000	22	17980001	18000000	-0.665059
22	17640001	17660000	22	17960001	17980000	-0.66188
22	17560001	17580000	22	17960001	17980000	-0.64621
3	3220001	3240000	3	4520001	4540000	0.701452
3	30660001	30680000	3	32480001	32500000	0.618043
3	25680001	25700000	3	25960001	25980000	-0.718615
3	25680001	25700000	3	25900001	25920000	-0.656199
3	25680001	25700000	3	25880001	25900000	-0.608424
3	25660001	25680000	3	25880001	25900000	-0.618807
22	50560001	50580000	22	51080001	51100000	-0.657284
22	46440001	46460000	22	47140001	47160000	0.664224
22	46400001	46420000	22	46700001	46720000	0.608458
22	46400001	46420000	22	46500001	46520000	0.658052
22	46380001	46400000	22	46500001	46520000	0.696532
22	45660001	45680000	22	45820001	45840000	-0.671128
22	44500001	44520000	22	44780001	44800000	-0.653175
22	42480001	42500000	22	42820001	42840000	-0.875993
22	42460001	42480000	22	42840001	42860000	-0.657171
22	42360001	42380000	22	42860001	42880000	-0.616406
22	42360001	42380000	22	42840001	42860000	-0.688418
22	42360001	42380000	22	42820001	42840000	-0.620503
22	40460001	40480000	22	40740001	40760000	0.603859
22	40440001	40460000	22	40740001	40760000	0.671028
22	40440001	40460000	22	40720001	40740000	0.628587
3	24040001	24060000	3	24260001	24280000	-0.750426
22	39920001	39940000	22	40740001	40760000	0.60047
3	23920001	23940000	3	25640001	25660000	0.894809
3	23920001	23940000	3	24280001	24300000	-0.823638
3	23920001	23940000	3	24260001	24280000	-0.796482
3	23920001	23940000	3	24200001	24220000	-0.617982
3	23900001	23920000	3	24280001	24300000	-0.824115
22	38460001	38480000	22	38980001	39000000	-0.649976
22	38440001	38460000	22	38980001	39000000	-0.637692
22	36600001	36620000	22	36880001	36900000	0.649289
22	36580001	36600000	22	36880001	36900000	0.685921
22	36560001	36580000	22	36880001	36900000	0.635552
22	36540001	36560000	22	36880001	36900000	0.606508
22	35820001	35840000	22	36500001	36520000	-0.757246
22	35820001	35840000	22	36480001	36500000	-0.806088
22	32920001	32940000	22	33180001	33200000	-0.749742
22	31860001	31880000	22	32020001	32040000	-0.673912
22	31860001	31880000	22	32000001	32020000	-0.600932
22	31840001	31860000	22	32020001	32040000	-0.6337
22	31340001	31360000	22	31680001	31700000	0.635576
22	31340001	31360000	22	31660001	31680000	0.623983
22	31340001	31360000	22	31640001	31660000	0.69306
22	31340001	31360000	22	31620001	31640000	0.644605
22	31320001	31340000	22	31640001	31660000	0.633969
22	31020001	31040000	22	31640001	31660000	0.716611
22	30780001	30800000	22	30880001	30900000	0.651322
22	30780001	30800000	22	30860001	30880000	0.642299
22	30680001	30700000	22	30880001	30900000	0.676473
22	30660001	30680000	22	30880001	30900000	0.717314
22	30660001	30680000	22	30860001	30880000	0.726274
22	29060001	29080000	22	29220001	29240000	0.655916
22	29060001	29080000	22	29200001	29220000	0.667032
22	29060001	29080000	22	29180001	29200000	0.680568
22	29000001	29020000	22	29140001	29160000	0.728435
22	25900001	25920000	22	26160001	26180000	-0.602111
22	25840001	25860000	22	26160001	26180000	-0.649995
22	25840001	25860000	22	26140001	26160000	-0.60774
22	25840001	25860000	22	26080001	26100000	-0.614944
22	25660001	25680000	22	26160001	26180000	-0.604567
22	25580001	25600000	22	26160001	26180000	-0.669099
22	23300001	23320000	22	23460001	23480000	-0.62065
3	21220001	21240000	3	21520001	21540000	0.771282
21	17100001	17120000	21	17180001	17200000	-0.714076
21	16880001	16900000	21	17100001	17120000	0.861777
21	16880001	16900000	21	17080001	17100000	0.853742
21	16300001	16320000	21	17380001	17400000	0.660967
21	46700001	46720000	21	46860001	46880000	0.731363
21	46360001	46380000	21	46840001	46860000	-0.627291
21	46220001	46240000	21	46340001	46360000	-0.669997
21	46220001	46240000	21	46320001	46340000	-0.65707
21	45540001	45560000	21	45880001	45900000	0.628268
21	45520001	45540000	21	46220001	46240000	0.916687
21	45360001	45380000	21	46240001	46260000	0.819702
21	45220001	45240000	21	46160001	46180000	0.667179
21	42660001	42680000	21	42820001	42840000	0.849964
21	42640001	42660000	21	42840001	42860000	0.795595
21	42640001	42660000	21	42820001	42840000	0.810425
21	40580001	40600000	21	40740001	40760000	-0.682326
21	40560001	40580000	21	40740001	40760000	-0.696089
21	40560001	40580000	21	40660001	40680000	-0.829256
21	40540001	40560000	21	40740001	40760000	-0.76049
21	38740001	38760000	21	38820001	38840000	-0.770336
21	37620001	37640000	21	37720001	37740000	-0.830314
21	37620001	37640000	21	37700001	37720000	-0.840949
21	37500001	37520000	21	37580001	37600000	-0.751726
21	35300001	35320000	21	35460001	35480000	-0.614088
21	35300001	35320000	21	35440001	35460000	-0.633829
21	34860001	34880000	21	34960001	34980000	-0.847721
21	34580001	34600000	21	34680001	34700000	-0.694674
21	32460001	32480000	21	32560001	32580000	-0.662868
21	30560001	30580000	21	30700001	30720000	-0.779953
21	30340001	30360000	21	30420001	30440000	-0.69915
21	26980001	27000000	21	27080001	27100000	-0.748954
21	26960001	26980000	21	27080001	27100000	-0.651326
21	25400001	25420000	21	25740001	25760000	-0.823529
20	18440001	18460000	20	18540001	18560000	-0.609641
20	18380001	18400000	20	19640001	19660000	-0.600558
20	18380001	18400000	20	19620001	19640000	-0.643136
20	18260001	18280000	20	18460001	18480000	0.874745
20	18260001	18280000	20	18440001	18460000	0.836209
20	18260001	18280000	20	20020001	20040000	0.639413
2	197020001	197040000	2	197120001	197140000	0.68847
2	196980001	197000000	2	197140001	197160000	0.747185
2	196980001	197000000	2	197120001	197140000	0.757889
2	196940001	196960000	2	197180001	197200000	0.756267
2	196940001	196960000	2	197160001	197180000	0.788568
2	196940001	196960000	2	197140001	197160000	0.786884
2	196920001	196940000	2	197200001	197220000	0.721535
2	196420001	196440000	2	196520001	196540000	0.719651
2	196400001	196420000	2	196520001	196540000	0.636919
2	196400001	196420000	2	196500001	196520000	0.700624
2	196380001	196400000	2	196520001	196540000	0.64083
2	196360001	196380000	2	196520001	196540000	0.618628
2	192440001	192460000	2	192560001	192580000	0.86255
2	192440001	192460000	2	192540001	192560000	0.82065
2	192420001	192440000	2	192600001	192620000	0.798324
2	192420001	192440000	2	192580001	192600000	0.830281
2	192420001	192440000	2	192560001	192580000	0.822142
2	192020001	192040000	2	192540001	192560000	0.795607
2	191900001	191920000	2	192540001	192560000	0.744699
2	191740001	191760000	2	191840001	191860000	0.656316
2	191380001	191400000	2	191520001	191540000	0.727763
2	191260001	191280000	2	191380001	191400000	0.657618
2	191240001	191260000	2	191380001	191400000	0.699278
2	190520001	190540000	2	190640001	190660000	0.797808
2	190520001	190540000	2	190620001	190640000	0.819246
2	190320001	190340000	2	190500001	190520000	0.78213
2	190320001	190340000	2	190460001	190480000	0.726829
2	190300001	190320000	2	190620001	190640000	0.72553
2	190000001	190020000	2	190180001	190200000	0.61789
2	189960001	189980000	2	190200001	190220000	0.615274
20	9960001	9980000	20	10060001	10080000	-0.80487
20	9940001	9960000	20	10060001	10080000	-0.678604
2	187360001	187380000	2	187500001	187520000	-0.909168
2	187360001	187380000	2	187480001	187500000	-0.866315
20	62120001	62140000	20	62740001	62760000	-0.625422
20	57200001	57220000	20	57960001	57980000	-0.626354
20	55960001	55980000	20	57720001	57740000	0.776157
20	55960001	55980000	20	56280001	56300000	0.807423
20	5520001	5540000	20	5960001	5980000	-0.634283
20	55120001	55140000	20	56780001	56800000	0.759904
20	5500001	5520000	20	5980001	6000000	-0.615756
20	53920001	53940000	20	54100001	54120000	0.629245
20	48580001	48600000	20	48680001	48700000	-0.735294
20	47740001	47760000	20	47840001	47860000	-0.658116
20	47740001	47760000	20	47820001	47840000	-0.685936
20	46360001	46380000	20	47220001	47240000	-0.675271
20	46340001	46360000	20	47220001	47240000	-0.727149
20	46300001	46320000	20	47220001	47240000	-0.761158
20	46300001	46320000	20	47120001	47140000	-0.779598
20	46280001	46300000	20	47240001	47260000	-0.687006
20	46280001	46300000	20	47220001	47240000	-0.765683
20	46120001	46140000	20	46240001	46260000	-0.781722
20	46120001	46140000	20	46220001	46240000	-0.747061
20	46120001	46140000	20	46200001	46220000	-0.74222
20	45900001	45920000	20	46240001	46260000	-0.61339
20	45900001	45920000	20	46000001	46020000	-0.676831
20	44420001	44440000	20	44720001	44740000	0.879536
20	43980001	44000000	20	44060001	44080000	-0.613516
20	43960001	43980000	20	44060001	44080000	-0.644181
20	43620001	43640000	20	43700001	43720000	-0.751524
20	43600001	43620000	20	43680001	43700000	-0.720433
20	43560001	43580000	20	43680001	43700000	-0.676842
20	42160001	42180000	20	42720001	42740000	-0.735324
20	42160001	42180000	20	42700001	42720000	-0.754461
20	42080001	42100000	20	42720001	42740000	-0.732155
20	42080001	42100000	20	42700001	42720000	-0.738952
20	42060001	42080000	20	42820001	42840000	-0.650462
20	42060001	42080000	20	42700001	42720000	-0.758042
20	40360001	40380000	20	41800001	41820000	-0.634683
20	37280001	37300000	20	37360001	37380000	-0.741701
20	37260001	37280000	20	37380001	37400000	-0.725993
20	37260001	37280000	20	37360001	37380000	-0.792941
20	36680001	36700000	20	36840001	36860000	-0.605915
20	36200001	36220000	20	37000001	37020000	-0.741114
20	36200001	36220000	20	36820001	36840000	-0.76865
20	36200001	36220000	20	36620001	36640000	-0.666967
20	36200001	36220000	20	36600001	36620000	-0.659853
20	36180001	36200000	20	36840001	36860000	-0.749635
20	36180001	36200000	20	36620001	36640000	-0.635461
20	35240001	35260000	20	35360001	35380000	-0.630657
20	33880001	33900000	20	34020001	34040000	-0.749485
20	33120001	33140000	20	33280001	33300000	-0.764533
20	32900001	32920000	20	33360001	33380000	-0.87744
20	32900001	32920000	20	33340001	33360000	-0.858343
20	32900001	32920000	20	33280001	33300000	-0.670626
20	32880001	32900000	20	33360001	33380000	-0.828164
20	32880001	32900000	20	33340001	33360000	-0.82609
20	32880001	32900000	20	33100001	33120000	-0.600627
2	183060001	183080000	2	183820001	183840000	-0.821122
2	183040001	183060000	2	183840001	183860000	-0.852042
2	183040001	183060000	2	183820001	183840000	-0.805426
20	30420001	30440000	20	30620001	30640000	-0.657793
20	30400001	30420000	20	30620001	30640000	-0.608946
20	3020001	3040000	20	3300001	3320000	-0.613985
20	23300001	23320000	20	23580001	23600000	-0.669806
20	21280001	21300000	20	21360001	21380000	-0.746701
20	21260001	21280000	20	21360001	21380000	-0.656612
20	21220001	21240000	20	21480001	21500000	-0.656313
20	21220001	21240000	20	21460001	21480000	-0.685688
20	21200001	21220000	20	21480001	21500000	-0.673009
20	21200001	21220000	20	21460001	21480000	-0.706044
20	21080001	21100000	20	21520001	21540000	-0.620832
20	21080001	21100000	20	21500001	21520000	-0.615308
20	21060001	21080000	20	21500001	21520000	-0.649031
20	20020001	20040000	20	21300001	21320000	0.641092
20	20020001	20040000	20	21080001	21100000	0.732456
20	20000001	20020000	20	21280001	21300000	0.609683
20	20000001	20020000	20	21100001	21120000	0.720484
20	20000001	20020000	20	21080001	21100000	0.765504
2	179640001	179660000	2	180600001	180620000	-0.648499
2	179620001	179640000	2	180600001	180620000	-0.703263
2	179560001	179580000	2	180600001	180620000	-0.600192
19	19280001	19300000	19	19580001	19600000	0.788542
19	18560001	18580000	19	19100001	19120000	0.665211
19	18380001	18400000	19	18500001	18520000	0.70325
19	18360001	18380000	19	18500001	18520000	0.669016
19	17720001	17740000	19	18480001	18500000	0.747552
2	176560001	176580000	2	176940001	176960000	-0.650362
2	176540001	176560000	2	176960001	176980000	-0.658507
2	176540001	176560000	2	176940001	176960000	-0.683697
19	16160001	16180000	19	16520001	16540000	-0.641352
19	16160001	16180000	19	16500001	16520000	-0.624076
19	15740001	15760000	19	16520001	16540000	-0.695137
2	175440001	175460000	2	175540001	175560000	0.611864
19	13980001	14000000	19	14440001	14460000	0.679428
19	13380001	13400000	19	13700001	13720000	-0.675721
19	13380001	13400000	19	13680001	13700000	-0.705225
19	13080001	13100000	19	13340001	13360000	0.608417
2	172440001	172460000	2	173340001	173360000	-0.629331
2	172440001	172460000	2	173320001	173340000	-0.674437
2	172440001	172460000	2	172980001	173000000	-0.668243
19	12020001	12040000	19	12240001	12260000	-0.689853
19	12000001	12020000	19	12240001	12260000	-0.654371
19	11980001	12000000	19	12240001	12260000	-0.611551
2	171920001	171940000	2	172280001	172300000	-0.612764
2	171840001	171860000	2	171980001	172000000	-0.604493
2	171820001	171840000	2	171920001	171940000	-0.687697
19	11660001	11680000	19	12540001	12560000	-0.667313
19	11380001	11400000	19	11580001	11600000	-0.732334
19	11380001	11400000	19	11560001	11580000	-0.758465
19	10220001	10240000	19	10500001	10520000	-0.672695
19	10220001	10240000	19	10340001	10360000	-0.746411
19	10200001	10220000	19	10500001	10520000	-0.784632
19	10200001	10220000	19	10340001	10360000	-0.794366
19	10180001	10200000	19	10360001	10380000	-0.792816
19	860001	880000	19	980001	1000000	0.613943
19	840001	860000	19	980001	1000000	0.762125
19	760001	780000	19	980001	1000000	0.628768
19	6300001	6320000	19	7820001	7840000	0.746002
2	166260001	166280000	2	166720001	166740000	-0.702269
2	166260001	166280000	2	166640001	166660000	-0.675515
2	166240001	166260000	2	166720001	166740000	-0.717742
2	166160001	166180000	2	166720001	166740000	-0.7079
2	166140001	166160000	2	166720001	166740000	-0.612841
19	58720001	58740000	19	59020001	59040000	0.645958
19	56580001	56600000	19	56820001	56840000	-0.600541
19	5040001	5060000	19	5580001	5600000	-0.617408
19	5040001	5060000	19	5560001	5580000	-0.649171
19	5040001	5060000	19	5460001	5480000	-0.638377
19	49540001	49560000	19	49860001	49880000	0.660816
19	49520001	49540000	19	49900001	49920000	0.730494
19	48840001	48860000	19	49100001	49120000	-0.696902
19	48320001	48340000	19	49040001	49060000	0.719302
19	47940001	47960000	19	48200001	48220000	-0.743641
19	47800001	47820000	19	48220001	48240000	-0.791263
19	47800001	47820000	19	48200001	48220000	-0.903576
19	47780001	47800000	19	48240001	48260000	-0.778195
19	47780001	47800000	19	48220001	48240000	-0.793199
19	47780001	47800000	19	48200001	48220000	-0.912997
19	46880001	46900000	19	47020001	47040000	-0.717869
19	46880001	46900000	19	47000001	47020000	-0.60934
19	46780001	46800000	19	47000001	47020000	-0.711925
19	4260001	4280000	19	4520001	4540000	-0.725797
19	4260001	4280000	19	4500001	4520000	-0.741021
19	4240001	4260000	19	4520001	4540000	-0.767995
19	4240001	4260000	19	4500001	4520000	-0.777551
19	40940001	40960000	19	41100001	41120000	0.695074
19	39920001	39940000	19	40020001	40040000	0.650367
19	38720001	38740000	19	39380001	39400000	0.725955
19	38380001	38400000	19	38800001	38820000	-0.605357
19	38380001	38400000	19	38720001	38740000	-0.645123
19	34700001	34720000	19	34920001	34940000	-0.633483
19	30240001	30260000	19	30360001	30380000	0.627916
19	30220001	30240000	19	30360001	30380000	0.672105
19	30100001	30120000	19	30420001	30440000	0.91613
19	30100001	30120000	19	30360001	30380000	0.938714
19	30100001	30120000	19	30340001	30360000	0.825744
19	30100001	30120000	19	30180001	30200000	0.709149
19	30080001	30100000	19	30360001	30380000	0.958828
19	30080001	30100000	19	30340001	30360000	0.930612
19	29700001	29720000	19	30300001	30320000	0.608398
2	162840001	162860000	2	162960001	162980000	0.601068
2	162840001	162860000	2	162940001	162960000	0.605589
2	162820001	162840000	2	162960001	162980000	0.675969
2	162780001	162800000	2	162960001	162980000	0.675658
2	162700001	162720000	2	162960001	162980000	0.628725
2	160001	180000	2	640001	660000	0.680922
2	161260001	161280000	2	161340001	161360000	0.743394
18	19180001	19200000	18	19260001	19280000	-0.615526
18	19160001	19180000	18	19380001	19400000	-0.606524
18	19160001	19180000	18	19300001	19320000	-0.637582
18	19020001	19040000	18	19540001	19560000	-0.71641
2	158640001	158660000	2	158840001	158860000	0.612232
2	158620001	158640000	2	158840001	158860000	0.659814
2	158340001	158360000	2	158860001	158880000	0.643102
2	158180001	158200000	2	158320001	158340000	0.815711
2	158180001	158200000	2	158300001	158320000	0.756175
2	158180001	158200000	2	158280001	158300000	0.731994
2	158180001	158200000	2	158260001	158280000	0.686834
2	158160001	158180000	2	158740001	158760000	0.66653
2	158160001	158180000	2	158460001	158480000	0.892896
2	158160001	158180000	2	158440001	158460000	0.874119
2	158160001	158180000	2	158340001	158360000	0.843697
2	158140001	158160000	2	158460001	158480000	0.815601
2	157180001	157200000	2	157260001	157280000	0.667316
2	153860001	153880000	2	154120001	154140000	-0.861157
2	152680001	152700000	2	153560001	153580000	-0.770625
2	152680001	152700000	2	153540001	153560000	-0.783073
2	152660001	152680000	2	153560001	153580000	-0.787062
2	152280001	152300000	2	152660001	152680000	0.709186
18	960001	980000	18	1860001	1880000	-0.76434
18	960001	980000	18	2040001	2060000	-0.818528
2	149400001	149420000	2	149820001	149840000	0.676441
2	149280001	149300000	2	149400001	149420000	0.786331
2	149280001	149300000	2	149380001	149400000	0.841566
2	148740001	148760000	2	149660001	149680000	0.712739
2	148680001	148700000	2	150420001	150440000	-0.647746
18	840001	860000	18	960001	980000	-0.638867
2	148040001	148060000	2	148660001	148680000	0.617164
2	148040001	148060000	2	148640001	148660000	0.629851
2	147820001	147840000	2	148080001	148100000	0.7047
18	7700001	7720000	18	7820001	7840000	-0.650724
18	7360001	7380000	18	7700001	7720000	-0.663246
2	147360001	147380000	2	147460001	147480000	0.616444
18	71840001	71860000	18	72000001	72020000	-0.631486
18	71840001	71860000	18	71980001	72000000	-0.653741
18	67860001	67880000	18	68100001	68120000	-0.781872
18	67840001	67860000	18	68100001	68120000	-0.850447
18	66980001	67000000	18	67760001	67780000	0.620925
18	66500001	66520000	18	68100001	68120000	-0.620531
18	65200001	65220000	18	66300001	66320000	0.728116
18	65180001	65200000	18	66380001	66400000	0.630813
18	65160001	65180000	18	66360001	66380000	0.69401
18	61000001	61020000	18	61100001	61120000	-0.633583
18	61000001	61020000	18	61080001	61100000	-0.721505
18	60380001	60400000	18	60640001	60660000	-0.673376
18	60380001	60400000	18	60620001	60640000	-0.674938
18	60360001	60380000	18	60640001	60660000	-0.691231
18	60360001	60380000	18	60620001	60640000	-0.67797
18	57500001	57520000	18	58200001	58220000	-0.667906
18	57480001	57500000	18	58220001	58240000	-0.66623
18	55280001	55300000	18	56800001	56820000	0.690136
18	55280001	55300000	18	56340001	56360000	0.722997
18	55260001	55280000	18	56800001	56820000	0.695525
18	51920001	51940000	18	52320001	52340000	-0.603856
18	51400001	51420000	18	52320001	52340000	-0.81162
18	48640001	48660000	18	49080001	49100000	-0.785668
18	48620001	48640000	18	49100001	49120000	-0.831949
18	48620001	48640000	18	49060001	49080000	-0.832832
18	47020001	47040000	18	47880001	47900000	0.619625
18	47000001	47020000	18	47880001	47900000	0.632604
18	4680001	4700000	18	4920001	4940000	-0.612544
18	46480001	46500000	18	46960001	46980000	-0.632347
18	46460001	46480000	18	46960001	46980000	-0.603278
18	46340001	46360000	18	46460001	46480000	-0.715103
18	46320001	46340000	18	46460001	46480000	-0.731581
18	46320001	46340000	18	46440001	46460000	-0.765851
18	46320001	46340000	18	46420001	46440000	-0.747098
18	46300001	46320000	18	46500001	46520000	-0.699752
18	46300001	46320000	18	46440001	46460000	-0.801261
18	46240001	46260000	18	46940001	46960000	-0.743731
18	46220001	46240000	18	46940001	46960000	-0.710855
18	46200001	46220000	18	47380001	47400000	-0.720914
18	46200001	46220000	18	46960001	46980000	-0.816297
18	46180001	46200000	18	47380001	47400000	-0.770655
18	46020001	46040000	18	47640001	47660000	-0.6765
18	45360001	45380000	18	45440001	45460000	-0.600722
18	4100001	4120000	18	5060001	5080000	-0.799367
18	4100001	4120000	18	5040001	5060000	-0.774641
18	4080001	4100000	18	5060001	5080000	-0.784242
18	39680001	39700000	18	40840001	40860000	-0.765357
2	143920001	143940000	2	144000001	144020000	0.643426
2	143880001	143900000	2	144000001	144020000	0.607849
2	143860001	143880000	2	144000001	144020000	0.609309
2	143860001	143880000	2	143940001	143960000	0.734778
18	36040001	36060000	18	36760001	36780000	-0.769613
18	29740001	29760000	18	30120001	30140000	-0.70105
18	29720001	29740000	18	30120001	30140000	-0.681414
18	29420001	29440000	18	29500001	29520000	-0.771621
18	2840001	2860000	18	3680001	3700000	0.600978
18	2800001	2820000	18	2900001	2920000	-0.731856
18	2680001	2700000	18	2780001	2800000	-0.601017
2	1420001	1440000	2	1520001	1540000	0.79106
18	23500001	23520000	18	23720001	23740000	-0.791406
18	2340001	2360000	18	2520001	2540000	-0.604526
18	2320001	2340000	18	2520001	2540000	-0.60222
18	21200001	21220000	18	21380001	21400000	-0.629469
18	2100001	2120000	18	2540001	2560000	-0.733285
18	2100001	2120000	18	2520001	2540000	-0.691597
18	2100001	2120000	18	2500001	2520000	-0.667161
18	2080001	2100000	18	2520001	2540000	-0.708571
18	20380001	20400000	18	20560001	20580000	-0.612398
2	138700001	138720000	2	139560001	139580000	-0.717114
2	138640001	138660000	2	139580001	139600000	-0.716369
2	138640001	138660000	2	139560001	139580000	-0.783117
2	138620001	138640000	2	139580001	139600000	-0.728094
2	138620001	138640000	2	139560001	139580000	-0.78905
2	138600001	138620000	2	139580001	139600000	-0.798205
2	138600001	138620000	2	139560001	139580000	-0.843216
2	1380001	1400000	2	1520001	1540000	0.78453
2	136740001	136760000	2	136860001	136880000	0.750047
2	136720001	136740000	2	136860001	136880000	0.733362
2	136700001	136720000	2	136860001	136880000	0.685807
2	136700001	136720000	2	136840001	136860000	0.679013
2	136680001	136700000	2	136860001	136880000	0.7009
2	136660001	136680000	2	136860001	136880000	0.676592
2	135420001	135440000	2	135660001	135680000	0.642835
17	15160001	15180000	17	15400001	15420000	-0.740809
2	134980001	135000000	2	135160001	135180000	0.761754
2	134880001	134900000	2	134980001	135000000	0.625356
2	134860001	134880000	2	135060001	135080000	0.719506
2	134860001	134880000	2	134980001	135000000	0.689043
17	14100001	14120000	17	14200001	14220000	0.630809
17	14080001	14100000	17	14320001	14340000	0.740691
17	13480001	13500000	17	14700001	14720000	-0.643334
17	13480001	13500000	17	14680001	14700000	-0.63716
[truncated: 1,265 more rows]

## Sheet: Table S4-5
Table S4. loops that strength corrlelation with clinical parameters of SLE patients
[truncated: 3,464 more rows]

[truncated: 1 more sheets: Table S4-6]
