# Supplementary material for: 3D genome alterations in T cells associated with disease activity of systemic lupus erythematosus
Source: HighWire-hosted journal article supplement (doi:10.1136/ard-2022-222653), 2022-09-01
Supplement: ard-2022-222653supp004_data_supplement.xlsx [file ard-2022-222653supp004_data_supplement.xlsx]

## Sheet: Table S5-1
Table S5. GO and pathway enrichment analysis in SLE looping associated genes.
Table S5-1 . GO functional Enrichment analysis in SLE looping associated genes.
geneSet	description	size	overlap	enrichmentRatio	pValue	userId
GO:0035767	endothelial cell chemotaxis	29	5	14.3672	2.22405e-05	NR4A1;TMSB4X;CXCL13;SEMA5A;EGR3
GO:0060326	cell chemotaxis	289	13	3.74841	4.80487e-05	NR4A1;C3AR1;DYSF;CCL2;CCL8;FFAR2;PREX1;TMSB4X;CXCL13;SEMA5A;DUSP1;EGR3;ANXA1
GO:0009615	response to virus	319	13	3.39589	0.000130171	NLRP3;IFI44L;IFI44;IFI16;TPT1;CCL8;PMAIP1;IFIH1;TLR7;TLR8;PARP9;GATA3;IFIT1B
GO:0002682	regulation of immune system process	1400	32	1.90469	0.000297663	NLRP3;IFI16;FCER1A;SUMO1;C12orf4;C3AR1;UBE2N;DTX1;PPP2R3C;HSP90AA1;DYSF;CCL2;CCL8;NME1;NME2;TNRC6C;IFIH1;FFAR2;FPR3;OSCAR;TLR7;TLR8;MITF;PARP9;CXCL13;DUSP1;HLA-DOB;TMEM176A;TMEM176B;EGR3;ANXA1;GATA3
GO:1902105	regulation of leukocyte differentiation	263	11	3.48529	0.000344468	NLRP3;DTX1;PPP2R3C;NME1;NME2;MITF;TMEM176A;TMEM176B;EGR3;ANXA1;GATA3
GO:0071398	cellular response to fatty acid	53	5	7.86132	0.000425646	PTGFR;NME1;NME2;FFAR2;ASS1
GO:0006935	chemotaxis	613	18	2.44688	0.000435922	NR4A1;C3AR1;DYSF;CCL2;CCL8;FFAR2;FPR3;PREX1;CDH4;TMSB4X;RPL24;CRMP1;CXCL13;SEMA5A;DUSP1;EGR3;ANXA1;GATA3
GO:0042330	taxis	615	18	2.43893	0.000453011	NR4A1;C3AR1;DYSF;CCL2;CCL8;FFAR2;FPR3;PREX1;CDH4;TMSB4X;RPL24;CRMP1;CXCL13;SEMA5A;DUSP1;EGR3;ANXA1;GATA3
GO:0045064	T-helper 2 cell differentiation	14	3	17.8564	0.000562087	NLRP3;ANXA1;GATA3
GO:0071621	granulocyte chemotaxis	119	7	4.90176	0.000582011	C3AR1;DYSF;CCL2;CCL8;PREX1;CXCL13;ANXA1
GO:0051345	positive regulation of hydrolase activity	746	20	2.23405	0.000666965	WNT4;NLRP3;DNAJB4;IFI16;RGS1;CASP5;SUMO1;NMUR1;CORO1C;GNAO1;ADAP2;CCL2;CCL8;PMAIP1;NDUFA13;PREX1;TMSB4X;ARL6IP5;CXCL13;FAM13A
GO:0051101	regulation of DNA binding	122	7	4.78123	0.000675299	IFI16;SUMO1;NME1;TMSB4X;EGF;TXN;GATA3
GO:0006663	platelet activating factor biosynthetic process	4	2	41.665	0.000846239	PLA2G4A;LPCAT2
GO:0045356	positive regulation of interferon-alpha biosynthetic process	4	2	41.665	0.000846239	TLR7;TLR8
GO:0080134	regulation of response to stress	1361	30	1.83681	0.000849405	GPR37L1;WNT4;NLRP3;IFI16;SUMO1;RAD51AP1;C3AR1;UBE2N;TRIAP1;TPT1;VASH1;HSP90AA1;ALOX12;RPL26;PMAIP1;IFIH1;FFAR2;TGM2;TLR7;TLR8;TMSB4X;ARL6IP5;TBC1D23;PARP9;NPM1;DUSP1;OXR1;ANXA1;TXN;GATA3
GO:0000956	nuclear-transcribed mRNA catabolic process	206	9	3.64063	0.000872178	TNRC6C;RPL26;LSM7;RPL24;RPL34;EXOSC9;LSM1;RPL35;RPS24
GO:0002521	leukocyte differentiation	496	15	2.52006	0.000977454	WNT4;NLRP3;IFI16;DTX1;PPP2R3C;NME1;NME2;OSCAR;PREX1;MITF;TMEM176A;TMEM176B;EGR3;ANXA1;GATA3
GO:1902106	negative regulation of leukocyte differentiation	95	6	5.26295	0.000993079	DTX1;NME1;NME2;TMEM176A;TMEM176B;ANXA1
GO:0032677	regulation of interleukin-8 production	64	5	6.51016	0.00101676	FFAR2;TLR7;TLR8;TMSB4X;ANXA1
GO:0030595	leukocyte chemotaxis	215	9	3.48823	0.00117777	C3AR1;DYSF;CCL2;CCL8;FFAR2;PREX1;CXCL13;DUSP1;ANXA1
GO:0097530	granulocyte migration	135	7	4.32081	0.00122505	C3AR1;DYSF;CCL2;CCL8;PREX1;CXCL13;ANXA1
GO:0006955	immune response	1919	38	1.6501	0.00126525	NLRP3;IFI44L;IFI44;SLC2A5;IFI16;FCER1A;NCF2;RGS1;TCN1;SUMO1;C12orf4;C3AR1;UBE2N;PPP2R3C;HSP90AA1;DYSF;IGSF6;CCL2;CCL8;NME2;MPO;IFIH1;FFAR2;GMFG;FPR3;OSCAR;PRDX4;TLR7;TLR8;PARP9;CXCL13;EXOSC9;HLA-DOB;CAPZA2;ASAH1;ANXA1;ASS1;GATA3
GO:0006402	mRNA catabolic process	308	11	2.97607	0.00126779	TNRC6C;RPL26;LSM7;FASTKD1;RPL24;RPL34;EXOSC9;NPM1;LSM1;RPL35;RPS24
GO:0030593	neutrophil chemotaxis	100	6	4.9998	0.00129652	C3AR1;DYSF;CCL2;CCL8;PREX1;CXCL13
GO:0022900	electron transport chain	179	8	3.72425	0.00145302	NCF2;ALDH2;COX6A1;COX5B;AOC2;COX7A2;NDUFB2;GLRX3
GO:0032637	interleukin-8 production	71	5	5.86831	0.00162287	FFAR2;TLR7;TLR8;TMSB4X;ANXA1
GO:0051098	regulation of binding	367	12	2.72469	0.00163504	IFI16;SUMO1;RAN;NME1;TEX14;TMSB4X;PARP9;CRMP1;EGF;TXN;GATA3;TCF7L2
GO:0042273	ribosomal large subunit biogenesis	73	5	5.70753	0.00183647	RPL26;RPL24;NPM1;RPL26L1;RPL35
GO:0060070	canonical Wnt signaling pathway	276	10	3.0192	0.00188309	WNT4;GSKIP;IFT20;MITF;EGF;SEMA5A;TMEM170B;ZNF703;GATA3;TCF7L2
GO:2001026	regulation of endothelial cell chemotaxis	21	3	11.9043	0.00193059	TMSB4X;CXCL13;SEMA5A
GO:0060548	negative regulation of cell death	998	23	1.92043	0.00202209	GPR37L1;WNT4;PTGFR;SOCS2;TRIAP1;TPT1;BCL2A1;ZFAND6;CCL2;NME2;MPO;ALOX12;NDUFA13;MITF;SEMA5A;NPM1;DUSP1;EGR3;OXR1;ANXA1;TXN;GATA3;TCF7L2
GO:2001199	negative regulation of dendritic cell differentiation	6	2	27.7767	0.00208229	TMEM176A;TMEM176B
GO:2000553	positive regulation of T-helper 2 cell cytokine production	6	2	27.7767	0.00208229	NLRP3;GATA3
GO:0006824	cobalt ion transport	6	2	27.7767	0.00208229	TCN1;TCN2
GO:0045349	interferon-alpha biosynthetic process	6	2	27.7767	0.00208229	TLR7;TLR8
GO:0045354	regulation of interferon-alpha biosynthetic process	6	2	27.7767	0.00208229	TLR7;TLR8
GO:0046469	platelet activating factor metabolic process	6	2	27.7767	0.00208229	PLA2G4A;LPCAT2
GO:0051607	defense response to virus	235	9	3.19136	0.0021698	NLRP3;IFI44L;IFI16;PMAIP1;IFIH1;TLR7;TLR8;PARP9;IFIT1B
GO:0032727	positive regulation of interferon-alpha production	22	3	11.3632	0.0022158	IFIH1;TLR7;TLR8
GO:0030155	regulation of cell adhesion	654	17	2.16607	0.00233898	WNT4;NLRP3;CORO1C;DTX1;DYSF;CCL2;ALOX12;TGM2;PREX1;CXCL13;SEMA5A;DUSP1;EGR3;ZNF703;ANXA1;ASS1;GATA3
GO:0044093	positive regulation of molecular function	1717	34	1.6501	0.00235902	WNT4;NLRP3;DNAJB4;IFI16;NCF2;RGS1;CASP5;SUMO1;NMUR1;UBE2N;CORO1C;RAN;PPP2R3C;HSP90AA1;GNAO1;ADAP2;CCL2;CCL8;NME1;PMAIP1;GMFG;NDUFA13;PREX1;TMSB4X;ARL6IP5;PARP9;CXCL13;FAM13A;EGF;ARRDC3;NPM1;TXN;GATA3;TCF7L2
GO:1990266	neutrophil migration	113	6	4.4246	0.00241774	C3AR1;DYSF;CCL2;CCL8;PREX1;CXCL13
GO:1901987	regulation of cell cycle phase transition	386	12	2.59057	0.00248305	TRIAP1;DLGAP5;HSP90AA1;CCL2;TEX14;RPL26;NDC80;UBE2E1;CEP70;NPM1;DUSP1;ANXA1
GO:0043542	endothelial cell migration	195	8	3.41867	0.00248416	NR4A1;VASH1;TMSB4X;CXCL13;SEMA5A;EGR3;ANXA1;GATA3
GO:0006887	exocytosis	894	21	1.95742	0.00253114	RIMS3;SLC2A5;TCN1;C12orf4;OTOF;C3AR1;WASHC3;HSP90AA1;TNFAIP2;CCL8;NME2;MPO;GMFG;OSCAR;PRDX4;SYTL4;TMSB4X;EGF;ASAH1;ANXA1;EXOC6
GO:0006954	inflammatory response	717	18	2.09197	0.00254838	NLRP3;PTGFR;IFI16;C3AR1;CCL2;CCL8;FFAR2;FPR3;TGM2;TLR7;TLR8;TMSB4X;TBC1D23;CXCL13;ANXA1;ASS1;GATA3;LIPA
GO:1903706	regulation of hemopoiesis	389	12	2.57059	0.00264498	NLRP3;DTX1;PPP2R3C;NME1;NME2;TNRC6C;MITF;TMEM176A;TMEM176B;EGR3;ANXA1;GATA3
GO:0097529	myeloid leukocyte migration	198	8	3.36687	0.00272919	C3AR1;DYSF;CCL2;CCL8;PREX1;CXCL13;DUSP1;ANXA1
GO:0006401	RNA catabolic process	341	11	2.68806	0.00281203	TNRC6C;RPL26;LSM7;FASTKD1;RPL24;RPL34;EXOSC9;NPM1;LSM1;RPL35;RPS24
GO:0043066	negative regulation of apoptotic process	903	21	1.93791	0.00284838	WNT4;PTGFR;SOCS2;TRIAP1;TPT1;BCL2A1;ZFAND6;CCL2;NME2;MPO;ALOX12;NDUFA13;MITF;SEMA5A;NPM1;DUSP1;EGR3;OXR1;ANXA1;GATA3;TCF7L2
GO:2000482	regulation of interleukin-8 secretion	24	3	10.4162	0.00286133	FFAR2;TMSB4X;ANXA1
GO:2000483	negative regulation of interleukin-8 secretion	7	2	23.8086	0.00289221	TMSB4X;ANXA1
GO:0000056	ribosomal small subunit export from nucleus	7	2	23.8086	0.00289221	RAN;NPM1
GO:0045359	positive regulation of interferon-beta biosynthetic process	7	2	23.8086	0.00289221	TLR7;TLR8
GO:0070542	response to fatty acid	82	5	5.0811	0.00305933	PTGFR;NME1;NME2;FFAR2;ASS1
GO:0036473	cell death in response to oxidative stress	82	5	5.0811	0.00305933	GPR37L1;GSKIP;ARL6IP5;OXR1;TXN
GO:0035458	cellular response to interferon-beta	25	3	9.9996	0.00322302	IFI16;NDUFA13;IFIT1B
GO:0030071	regulation of mitotic metaphase/anaphase transition	51	4	6.53569	0.00323756	DLGAP5;TEX14;NDC80;DUSP1
GO:0007187	G protein-coupled receptor signaling pathway, coupled to cyclic nucleotide second messenger	250	9	2.99988	0.00328088	GPR37L1;PTGFR;RGS1;ADGRD1;GNAO1;CCL2;NME2;ARRDC3;ANXA1
GO:0071674	mononuclear cell migration	84	5	4.96012	0.00339561	C3AR1;CCL2;CCL8;DUSP1;ANXA1
GO:0043069	negative regulation of programmed cell death	917	21	1.90832	0.0034083	WNT4;PTGFR;SOCS2;TRIAP1;TPT1;BCL2A1;ZFAND6;CCL2;NME2;MPO;ALOX12;NDUFA13;MITF;SEMA5A;NPM1;DUSP1;EGR3;OXR1;ANXA1;GATA3;TCF7L2
GO:1902099	regulation of metaphase/anaphase transition of cell cycle	53	4	6.28906	0.00372384	DLGAP5;TEX14;NDC80;DUSP1
GO:1901990	regulation of mitotic cell cycle phase transition	354	11	2.58935	0.00373422	TRIAP1;DLGAP5;HSP90AA1;CCL2;TEX14;RPL26;NDC80;UBE2E1;CEP70;DUSP1;ANXA1
GO:0044387	negative regulation of protein kinase activity by regulation of protein phosphorylation	8	2	20.8325	0.00382588	CORO1C;NPM1
GO:0021940	positive regulation of cerebellar granule cell precursor proliferation	8	2	20.8325	0.00382588	GPR37L1;EGF
GO:0015889	cobalamin transport	8	2	20.8325	0.00382588	TCN1;TCN2
GO:0045350	interferon-beta biosynthetic process	8	2	20.8325	0.00382588	TLR7;TLR8
GO:0045357	regulation of interferon-beta biosynthetic process	8	2	20.8325	0.00382588	TLR7;TLR8
GO:0072593	reactive oxygen species metabolic process	256	9	2.92957	0.00383419	NCF2;HSP90AA1;MPO;ALOX12;PMAIP1;NDUFA13;PREX1;PRDX4;ASS1
GO:0007091	metaphase/anaphase transition of mitotic cell cycle	54	4	6.17259	0.00398458	DLGAP5;TEX14;NDC80;DUSP1
GO:0001936	regulation of endothelial cell proliferation	125	6	3.99984	0.00398953	NR4A1;VASH1;DYSF;CCL2;SEMA5A;EGR3
GO:0050663	cytokine secretion	211	8	3.15943	0.00401687	NLRP3;DYSF;IFIH1;FFAR2;TLR8;TMSB4X;ANXA1;GATA3
GO:2001024	negative regulation of response to drug	27	3	9.25889	0.00402739	GPR37L1;ARL6IP5;TXN
GO:0036151	phosphatidylcholine acyl-chain remodeling	27	3	9.25889	0.00402739	PLA2G4A;PLB1;LPCAT2
GO:0032355	response to estradiol	126	6	3.9681	0.00414812	PTGFR;SOCS2;DUSP1;ZNF703;ANXA1;ASS1
GO:0043085	positive regulation of catalytic activity	1380	28	1.69075	0.00421216	WNT4;NLRP3;DNAJB4;IFI16;NCF2;RGS1;CASP5;SUMO1;NMUR1;UBE2N;CORO1C;PPP2R3C;HSP90AA1;GNAO1;ADAP2;CCL2;CCL8;PMAIP1;GMFG;NDUFA13;PREX1;TMSB4X;ARL6IP5;CXCL13;FAM13A;EGF;ARRDC3;TXN
GO:0072606	interleukin-8 secretion	28	3	8.92821	0.00447122	FFAR2;TMSB4X;ANXA1
GO:0032647	regulation of interferon-alpha production	28	3	8.92821	0.00447122	IFIH1;TLR7;TLR8
GO:0010965	regulation of mitotic sister chromatid separation	56	4	5.95214	0.00454256	DLGAP5;TEX14;NDC80;DUSP1
GO:0044784	metaphase/anaphase transition of cell cycle	56	4	5.95214	0.00454256	DLGAP5;TEX14;NDC80;DUSP1
GO:0044770	cell cycle phase transition	526	14	2.21791	0.00456008	PRIM1;TRIAP1;DLGAP5;HSP90AA1;CCL2;TEX14;RPL26;NDC80;UBE2E1;RPL24;CEP70;NPM1;DUSP1;ANXA1
GO:0040013	negative regulation of locomotion	314	10	2.65382	0.00472765	WNT4;CORO1C;VASH1;CCL2;MITF;CXCL13;SEMA5A;ARRDC3;DUSP1;GATA3
GO:0050922	negative regulation of chemotaxis	57	4	5.84772	0.0048403	CCL2;CXCL13;SEMA5A;DUSP1
GO:0045416	positive regulation of interleukin-8 biosynthetic process	9	2	18.5178	0.00488024	TLR7;TLR8
GO:0010917	negative regulation of mitochondrial membrane potential	9	2	18.5178	0.00488024	PMAIP1;ARL6IP5
GO:0006228	UTP biosynthetic process	9	2	18.5178	0.00488024	NME1;NME2
GO:0042989	sequestering of actin monomers	9	2	18.5178	0.00488024	TWF1;TMSB4X
GO:0097064	ncRNA export from nucleus	9	2	18.5178	0.00488024	RAN;NPM1
GO:0045621	positive regulation of lymphocyte differentiation	92	5	4.5288	0.00500943	NLRP3;PPP2R3C;EGR3;ANXA1;GATA3
GO:0016071	mRNA metabolic process	765	18	1.96071	0.00501264	APOBEC4;PPIL3;TNRC6C;RBFOX3;RPL26;LSM7;SNRPD2;FASTKD1;CIR1;THOC7;RPL24;TRMT10C;RPL34;EXOSC9;NPM1;LSM1;RPL35;RPS24
GO:0051130	positive regulation of cellular component organization	1203	25	1.73171	0.00506328	WNT4;SUMO1;TWF1;UBE2N;CORO1C;PSMC6;DLGAP5;PLEK2;HSP90AA1;CCL2;NME1;NME2;PMAIP1;GMFG;PREX1;CDH4;ZMYND10;MITF;CXCL13;EGF;SEMA5A;PACSIN1;TOMM7;ANXA1;GATA3
GO:0043388	positive regulation of DNA binding	58	4	5.7469	0.00515088	NME1;EGF;TXN;GATA3
GO:0050678	regulation of epithelial cell proliferation	318	10	2.62044	0.00515993	NR4A1;VASH1;DYSF;CCL2;NME1;NME2;SEMA5A;EGR3;ZNF703;GATA3
GO:0002252	immune effector process	1141	24	1.75278	0.00518735	NLRP3;IFI44L;SLC2A5;IFI16;TCN1;C12orf4;C3AR1;HSP90AA1;DYSF;NME2;MPO;PMAIP1;IFIH1;FFAR2;GMFG;OSCAR;PRDX4;TLR7;TLR8;PARP9;ASAH1;ANXA1;GATA3;IFIT1B
GO:0051241	negative regulation of multicellular organismal process	1143	24	1.74971	0.00529958	GPR37L1;WNT4;NLRP3;SOCS2;CORO1C;DTX1;VASH1;NME1;NME2;ALOX12;IFIH1;PRDX4;TLR8;TMSB4X;CRMP1;CXCL13;SEMA5A;ARRDC3;TMEM176A;TMEM176B;LSM1;ANXA1;GATA3;GLRX3
GO:0046903	secretion	1605	31	1.60949	0.00537019	NLRP3;RIMS3;SLC2A5;PLA2G4A;TCN1;C12orf4;OTOF;C3AR1;SOCS2;WASHC3;HSP90AA1;TNFAIP2;DYSF;CCL8;NME1;NME2;MPO;IFIH1;FFAR2;GMFG;OSCAR;PRDX4;SYTL4;TLR8;TMSB4X;EGF;ASAH1;ANXA1;GATA3;EXOC6;TCF7L2
GO:0071214	cellular response to abiotic stimulus	320	10	2.60406	0.0053874	IFI16;CASP5;RAD51AP1;TRIAP1;DYSF;RPL26;TLR7;TLR8;NPM1;GATA3
GO:0104004	cellular response to environmental stimulus	320	10	2.60406	0.0053874	IFI16;CASP5;RAD51AP1;TRIAP1;DYSF;RPL26;TLR7;TLR8;NPM1;GATA3
GO:1903707	negative regulation of hemopoiesis	133	6	3.75925	0.00539198	DTX1;NME1;NME2;TMEM176A;TMEM176B;ANXA1
GO:0032101	regulation of response to external stimulus	771	18	1.94545	0.00542631	WNT4;NLRP3;C3AR1;PPP2R3C;DYSF;CCL2;ALOX12;FFAR2;TGM2;TLR7;TMSB4X;TBC1D23;PARP9;CXCL13;SEMA5A;DUSP1;ANXA1;GATA3
GO:0002828	regulation of type 2 immune response	30	3	8.333	0.00544483	NLRP3;ANXA1;GATA3
GO:0032607	interferon-alpha production	30	3	8.333	0.00544483	IFIH1;TLR7;TLR8
GO:0051306	mitotic sister chromatid separation	59	4	5.64949	0.00547453	DLGAP5;TEX14;NDC80;DUSP1
GO:0051707	response to other organism	897	20	1.85797	0.00568633	NLRP3;PTGFR;IFI44L;IFI44;IFI16;RGS1;TPT1;PPP2R3C;CCL2;CCL8;MPO;PMAIP1;IFIH1;TLR7;TLR8;PARP9;CXCL13;ASS1;GATA3;IFIT1B
GO:0006614	SRP-dependent cotranslational protein targeting to membrane	95	5	4.38579	0.00573495	RPL26;RPL24;RPL34;RPL35;RPS24
GO:0062013	positive regulation of small molecule metabolic process	135	6	3.70356	0.00579274	WNT4;PMAIP1;ABCG1;TMSB4X;EGF;ANXA1
GO:0044344	cellular response to fibroblast growth factor stimulus	135	6	3.70356	0.00579274	WNT4;NR4A1;CCL2;CXCL13;EGR3;GATA3
GO:0043207	response to external biotic stimulus	899	20	1.85384	0.00582451	NLRP3;PTGFR;IFI44L;IFI44;IFI16;RGS1;TPT1;PPP2R3C;CCL2;CCL8;MPO;PMAIP1;IFIH1;TLR7;TLR8;PARP9;CXCL13;ASS1;GATA3;IFIT1B
GO:0010631	epithelial cell migration	274	9	2.73712	0.00594198	NR4A1;CORO1C;VASH1;TMSB4X;CXCL13;SEMA5A;EGR3;ANXA1;GATA3
GO:0046039	GTP metabolic process	31	3	8.06419	0.00597557	RAN;NME1;NME2
GO:0032728	positive regulation of interferon-beta production	31	3	8.06419	0.00597557	IFIH1;TLR7;TLR8
GO:0001525	angiogenesis	487	13	2.22441	0.00604106	NR4A1;C3AR1;VASH1;TNFAIP2;DYSF;CCL2;CCL8;SAT1;CXCL13;EGF;SEMA5A;EGR3;ANXA1
GO:0044772	mitotic cell cycle phase transition	487	13	2.22441	0.00604106	PRIM1;TRIAP1;DLGAP5;HSP90AA1;CCL2;TEX14;RPL26;NDC80;UBE2E1;RPL24;CEP70;DUSP1;ANXA1
GO:2000551	regulation of T-helper 2 cell cytokine production	10	2	16.666	0.00605231	NLRP3;GATA3
GO:0021924	cell proliferation in external granule layer	10	2	16.666	0.00605231	GPR37L1;EGF
GO:0021930	cerebellar granule cell precursor proliferation	10	2	16.666	0.00605231	GPR37L1;EGF
GO:0045837	negative regulation of membrane potential	10	2	16.666	0.00605231	PMAIP1;ARL6IP5
GO:0046051	UTP metabolic process	10	2	16.666	0.00605231	NME1;NME2
GO:0021936	regulation of cerebellar granule cell precursor proliferation	10	2	16.666	0.00605231	GPR37L1;EGF
GO:0006183	GTP biosynthetic process	10	2	16.666	0.00605231	NME1;NME2
GO:0000055	ribosomal large subunit export from nucleus	10	2	16.666	0.00605231	RAN;NPM1
GO:0051099	positive regulation of binding	180	7	3.24061	0.00609646	RAN;NME1;PARP9;EGF;TXN;GATA3;TCF7L2
GO:1905818	regulation of chromosome separation	61	4	5.46426	0.00616201	DLGAP5;TEX14;NDC80;DUSP1
GO:0002685	regulation of leukocyte migration	181	7	3.22271	0.006279	C3AR1;DYSF;CCL2;CCL8;CXCL13;DUSP1;ANXA1
GO:0090132	epithelium migration	277	9	2.70747	0.00636652	NR4A1;CORO1C;VASH1;TMSB4X;CXCL13;SEMA5A;EGR3;ANXA1;GATA3
GO:0050679	positive regulation of epithelial cell proliferation	183	7	3.18749	0.00665628	NR4A1;DYSF;NME1;NME2;SEMA5A;EGR3;ZNF703
GO:0022407	regulation of cell-cell adhesion	383	11	2.39329	0.00666773	WNT4;NLRP3;DTX1;CCL2;ALOX12;CXCL13;EGR3;ZNF703;ANXA1;ASS1;GATA3
GO:0006613	cotranslational protein targeting to membrane	99	5	4.20859	0.00681357	RPL26;RPL24;RPL34;RPL35;RPS24
GO:0002548	monocyte chemotaxis	63	4	5.29079	0.0069046	CCL2;CCL8;DUSP1;ANXA1
GO:0043491	protein kinase B signaling	232	8	2.87345	0.0070319	PEAR1;HSP90AA1;CCL2;EGF;SEMA5A;TXN;GATA3;TCF7L2
GO:0050707	regulation of cytokine secretion	185	7	3.15303	0.00705018	NLRP3;IFIH1;FFAR2;TLR8;TMSB4X;ANXA1;GATA3
GO:0001935	endothelial cell proliferation	141	6	3.54596	0.00712559	NR4A1;VASH1;DYSF;CCL2;SEMA5A;EGR3
GO:0030879	mammary gland development	141	6	3.54596	0.00712559	WNT4;SOCS2;NME1;EGF;ZNF703;GATA3
GO:0035456	response to interferon-beta	33	3	7.57545	0.00712711	IFI16;NDUFA13;IFIT1B
GO:0043928	exonucleolytic nuclear-transcribed mRNA catabolic process involved in deadenylation-dependent decay	33	3	7.57545	0.00712711	LSM7;EXOSC9;LSM1
GO:1901566	organonitrogen compound biosynthetic process	1776	33	1.54836	0.00724712	SDC3;PLA2G4A;ST8SIA1;HDC;ST20-MTHFS;KLHL25;COX5B;LPCAT2;NME1;NME2;MRPS23;TNRC6C;RPL26;ASNSD1;SAT1;TLR7;TLR8;TMSB4X;RPL24;TRMT10C;PARP9;PYURF;PIGY;RPL34;EGF;NPM1;RPL26L1;MRPS33;RPL35;ASS1;RPS24;GATA3;TCF7L2
GO:0090130	tissue migration	283	9	2.65007	0.00728536	NR4A1;CORO1C;VASH1;TMSB4X;CXCL13;SEMA5A;EGR3;ANXA1;GATA3
GO:0006801	superoxide metabolic process	64	4	5.20812	0.00729712	NCF2;MPO;ALOX12;PREX1
GO:0050710	negative regulation of cytokine secretion	64	4	5.20812	0.00729712	NLRP3;TLR8;TMSB4X;ANXA1
GO:0045628	regulation of T-helper 2 cell differentiation	11	2	15.1509	0.00733912	NLRP3;ANXA1
GO:0021534	cell proliferation in hindbrain	11	2	15.1509	0.00733912	GPR37L1;EGF
GO:0045351	type I interferon biosynthetic process	11	2	15.1509	0.00733912	TLR7;TLR8
GO:2001056	positive regulation of cysteine-type endopeptidase activity	142	6	3.52099	0.0073676	NLRP3;IFI16;CASP5;PMAIP1;NDUFA13;ARL6IP5
GO:0071774	response to fibroblast growth factor	142	6	3.52099	0.0073676	WNT4;NR4A1;CCL2;CXCL13;EGR3;GATA3
GO:0097193	intrinsic apoptotic signaling pathway	285	9	2.63147	0.00761318	IFI16;TRIAP1;TPT1;GSKIP;BCL2A1;RPL26;PMAIP1;NDUFA13;ARL6IP5
GO:0032481	positive regulation of type I interferon production	65	4	5.128	0.00770409	IFI16;IFIH1;TLR7;TLR8
GO:0007094	mitotic spindle assembly checkpoint	34	3	7.35265	0.0077487	TEX14;NDC80;DUSP1
GO:0031577	spindle checkpoint	34	3	7.35265	0.0077487	TEX14;NDC80;DUSP1
GO:0071173	spindle assembly checkpoint	34	3	7.35265	0.0077487	TEX14;NDC80;DUSP1
GO:0071174	mitotic spindle checkpoint	34	3	7.35265	0.0077487	TEX14;NDC80;DUSP1
GO:0010941	regulation of cell death	1649	31	1.56654	0.00787621	GPR37L1;WNT4;NLRP3;PTGFR;CASP5;SOCS2;TRIAP1;TPT1;BCL2A1;ZFAND6;CCL2;NME1;NME2;MPO;ALOX12;RPL26;PMAIP1;NDUFA13;TGM2;PREX1;ARL6IP5;MITF;SEMA5A;NPM1;DUSP1;EGR3;OXR1;ANXA1;TXN;GATA3;TCF7L2
GO:0009607	response to biotic stimulus	926	20	1.79978	0.00797688	NLRP3;PTGFR;IFI44L;IFI44;IFI16;RGS1;TPT1;PPP2R3C;CCL2;CCL8;MPO;PMAIP1;IFIH1;TLR7;TLR8;PARP9;CXCL13;ASS1;GATA3;IFIT1B
GO:0008630	intrinsic apoptotic signaling pathway in response to DNA damage	103	5	4.04515	0.00802678	IFI16;TRIAP1;TPT1;BCL2A1;RPL26
GO:0042981	regulation of apoptotic process	1517	29	1.59299	0.0081373	WNT4;NLRP3;PTGFR;CASP5;SOCS2;TRIAP1;TPT1;BCL2A1;ZFAND6;CCL2;NME1;NME2;MPO;ALOX12;RPL26;PMAIP1;NDUFA13;TGM2;PREX1;ARL6IP5;MITF;SEMA5A;NPM1;DUSP1;EGR3;OXR1;ANXA1;GATA3;TCF7L2
GO:0006909	phagocytosis	238	8	2.80101	0.00814628	PEAR1;NCF2;CORO1C;HSP90AA1;DYSF;CCL2;TGM2;ANXA1
GO:0060416	response to growth hormone	35	3	7.14257	0.00840131	SOCS2;NME2;ASS1
GO:0090279	regulation of calcium ion import	35	3	7.14257	0.00840131	DYSF;CCL2;EGF
GO:0007223	Wnt signaling pathway, calcium modulating pathway	35	3	7.14257	0.00840131	GNAO1;TNRC6C;TCF7L2
GO:0000291	nuclear-transcribed mRNA catabolic process, exonucleolytic	35	3	7.14257	0.00840131	LSM7;EXOSC9;LSM1
GO:0033047	regulation of mitotic sister chromatid segregation	67	4	4.97493	0.00856219	DLGAP5;TEX14;NDC80;DUSP1
GO:0006413	translational initiation	192	7	3.03807	0.00856593	KLHL25;RPL26;RPL24;RPL34;NPM1;RPL35;RPS24
GO:0045862	positive regulation of proteolysis	343	10	2.42945	0.0086089	NLRP3;IFI16;CASP5;SUMO1;PSMC6;PMAIP1;NDUFA13;ARL6IP5;EGF;RNF217
GO:2001198	regulation of dendritic cell differentiation	12	2	13.8883	0.00873778	TMEM176A;TMEM176B
GO:0002430	complement receptor mediated signaling pathway	12	2	13.8883	0.00873778	C3AR1;FPR3
GO:0045078	positive regulation of interferon-gamma biosynthetic process	12	2	13.8883	0.00873778	TLR7;TLR8
GO:0042092	type 2 immune response	36	3	6.94417	0.00908528	NLRP3;ANXA1;GATA3
GO:0045841	negative regulation of mitotic metaphase/anaphase transition	36	3	6.94417	0.00908528	TEX14;NDC80;DUSP1
GO:0043067	regulation of programmed cell death	1531	29	1.57843	0.00918732	WNT4;NLRP3;PTGFR;CASP5;SOCS2;TRIAP1;TPT1;BCL2A1;ZFAND6;CCL2;NME1;NME2;MPO;ALOX12;RPL26;PMAIP1;NDUFA13;TGM2;PREX1;ARL6IP5;MITF;SEMA5A;NPM1;DUSP1;EGR3;OXR1;ANXA1;GATA3;TCF7L2
GO:0016055	Wnt signaling pathway	457	12	2.1881	0.00928969	WNT4;GSKIP;GNAO1;IFT20;TNRC6C;MITF;EGF;SEMA5A;TMEM170B;ZNF703;GATA3;TCF7L2
GO:0045047	protein targeting to ER	107	5	3.89393	0.00938247	RPL26;RPL24;RPL34;RPL35;RPS24
GO:0048514	blood vessel morphogenesis	574	14	2.03244	0.00954127	WNT4;NR4A1;C3AR1;VASH1;TNFAIP2;DYSF;CCL2;CCL8;SAT1;CXCL13;EGF;SEMA5A;EGR3;ANXA1
GO:0002274	myeloid leukocyte activation	634	15	1.97153	0.00963692	SLC2A5;TCN1;C12orf4;C3AR1;HSP90AA1;DYSF;NME2;MPO;GMFG;OSCAR;PREX1;PRDX4;TLR7;TLR8;ASAH1
GO:0001775	cell activation	1335	26	1.62291	0.00968364	WNT4;NLRP3;SLC2A5;PEAR1;TCN1;C12orf4;C3AR1;DTX1;PPP2R3C;HSP90AA1;DYSF;CCL2;NME2;MPO;ALOX12;MYL12A;GMFG;OSCAR;PREX1;PRDX4;TLR7;TLR8;EGR3;ASAH1;ANXA1;GATA3
GO:0198738	cell-cell signaling by wnt	460	12	2.17383	0.00975182	WNT4;GSKIP;GNAO1;IFT20;TNRC6C;MITF;EGF;SEMA5A;TMEM170B;ZNF703;GATA3;TCF7L2
GO:1902100	negative regulation of metaphase/anaphase transition of cell cycle	37	3	6.75649	0.00980091	TEX14;NDC80;DUSP1
GO:0010594	regulation of endothelial cell migration	151	6	3.31113	0.00981998	VASH1;TMSB4X;CXCL13;SEMA5A;ANXA1;GATA3
GO:0032940	secretion by cell	1472	28	1.58508	0.00990787	NLRP3;RIMS3;SLC2A5;TCN1;C12orf4;OTOF;C3AR1;WASHC3;HSP90AA1;TNFAIP2;DYSF;CCL8;NME2;MPO;IFIH1;FFAR2;GMFG;OSCAR;PRDX4;SYTL4;TLR8;TMSB4X;EGF;ASAH1;ANXA1;GATA3;EXOC6;TCF7L2
GO:0007346	regulation of mitotic cell cycle	578	14	2.01837	0.010099	TRIAP1;DLGAP5;HSP90AA1;CCL2;TEX14;RPL26;NDC80;UBE2E1;RPL24;CEP70;EGF;DUSP1;TMEM8B;ANXA1
GO:0002688	regulation of leukocyte chemotaxis	109	5	3.82248	0.0101161	C3AR1;DYSF;CCL2;CXCL13;DUSP1
GO:0017144	drug metabolic process	760	17	1.86396	0.0102062	WNT4;CYP2J2;PLA2G4A;TCN1;ALDH2;COX6A1;MDH1;HSP90AA1;COX5B;LPCAT2;MPO;TCN2;PRDX4;TMSB4X;COX7A2;NDUFB2;ASS1
GO:0034374	low-density lipoprotein particle remodeling	13	2	12.82	0.0102455	MPO;ABCG1
GO:0045414	regulation of interleukin-8 biosynthetic process	13	2	12.82	0.0102455	TLR7;TLR8
GO:0035745	T-helper 2 cell cytokine production	13	2	12.82	0.0102455	NLRP3;GATA3
GO:0006241	CTP biosynthetic process	13	2	12.82	0.0102455	NME1;NME2
GO:0046036	CTP metabolic process	13	2	12.82	0.0102455	NME1;NME2
GO:0032754	positive regulation of interleukin-5 production	13	2	12.82	0.0102455	NLRP3;GATA3
GO:1901070	guanosine-containing compound biosynthetic process	13	2	12.82	0.0102455	NME1;NME2
GO:0071479	cellular response to ionizing radiation	71	4	4.69465	0.0104607	IFI16;RAD51AP1;RPL26;GATA3
GO:2000816	negative regulation of mitotic sister chromatid separation	38	3	6.57868	0.0105485	TEX14;NDC80;DUSP1
GO:0032350	regulation of hormone metabolic process	38	3	6.57868	0.0105485	WNT4;GATA3;TCF7L2
GO:0051271	negative regulation of cellular component movement	301	9	2.49159	0.0106577	WNT4;CORO1C;VASH1;CCL2;MITF;CXCL13;SEMA5A;DUSP1;GATA3
GO:0008154	actin polymerization or depolymerization	201	7	2.90204	0.0108513	TWF1;WASHC3;GMFG;PREX1;TMSB4X;SEMA5A;CAPZA2
GO:0072599	establishment of protein localization to endoplasmic reticulum	111	5	3.7536	0.0108883	RPL26;RPL24;RPL34;RPL35;RPS24
GO:0000288	nuclear-transcribed mRNA catabolic process, deadenylation-dependent decay	72	4	4.62944	0.0109744	TNRC6C;LSM7;EXOSC9;LSM1
GO:0043534	blood vessel endothelial cell migration	112	5	3.72009	0.011289	NR4A1;VASH1;TMSB4X;EGR3;ANXA1
GO:1905819	negative regulation of chromosome separation	39	3	6.41	0.0113282	TEX14;NDC80;DUSP1
GO:1902229	regulation of intrinsic apoptotic signaling pathway in response to DNA damage	39	3	6.41	0.0113282	TRIAP1;TPT1;RPL26
GO:2001020	regulation of response to DNA damage stimulus	203	7	2.87345	0.011414	RAD51AP1;UBE2N;TRIAP1;TPT1;RPL26;PMAIP1;PARP9
GO:0034111	negative regulation of homotypic cell-cell adhesion	14	2	11.9043	0.0118594	ALOX12;ZNF703
GO:0042228	interleukin-8 biosynthetic process	14	2	11.9043	0.0118594	TLR7;TLR8
GO:0043517	positive regulation of DNA damage response, signal transduction by p53 class mediator	14	2	11.9043	0.0118594	RPL26;PMAIP1
GO:0009209	pyrimidine ribonucleoside triphosphate biosynthetic process	14	2	11.9043	0.0118594	NME1;NME2
GO:0090151	establishment of protein localization to mitochondrial membrane	14	2	11.9043	0.0118594	HSP90AA1;NDUFA13
GO:0090231	regulation of spindle checkpoint	14	2	11.9043	0.0118594	NDC80;DUSP1
GO:0090266	regulation of mitotic cell cycle spindle assembly checkpoint	14	2	11.9043	0.0118594	NDC80;DUSP1
GO:1903504	regulation of mitotic spindle checkpoint	14	2	11.9043	0.0118594	NDC80;DUSP1
GO:0006123	mitochondrial electron transport, cytochrome c to oxygen	14	2	11.9043	0.0118594	COX6A1;COX5B
GO:0019646	aerobic electron transport chain	14	2	11.9043	0.0118594	COX6A1;COX5B
GO:0050920	regulation of chemotaxis	205	7	2.84541	0.0119976	C3AR1;DYSF;CCL2;TMSB4X;CXCL13;SEMA5A;DUSP1
GO:2001242	regulation of intrinsic apoptotic signaling pathway	158	6	3.16443	0.0120929	TRIAP1;TPT1;BCL2A1;RPL26;PMAIP1;NDUFA13
GO:0043277	apoptotic cell clearance	40	3	6.24975	0.0121403	PEAR1;CCL2;TGM2
GO:0032731	positive regulation of interleukin-1 beta production	40	3	6.24975	0.0121403	NLRP3;IFI16;TLR8
GO:0051897	positive regulation of protein kinase B signaling	159	6	3.14453	0.0124455	HSP90AA1;EGF;SEMA5A;TXN;GATA3;TCF7L2
GO:0001568	blood vessel development	654	15	1.91124	0.0125344	WNT4;NR4A1;C3AR1;VASH1;TNFAIP2;DYSF;CCL2;CCL8;SAT1;CXCL13;EGF;SEMA5A;EGR3;ANXA1;TCF7L2
GO:0080135	regulation of cellular response to stress	654	15	1.91124	0.0125344	GPR37L1;RAD51AP1;UBE2N;TRIAP1;TPT1;VASH1;HSP90AA1;RPL26;PMAIP1;ARL6IP5;PARP9;NPM1;DUSP1;OXR1;TXN
GO:0050900	leukocyte migration	419	11	2.18766	0.0125366	SDC3;C3AR1;DYSF;CCL2;CCL8;FFAR2;PREX1;CXCL13;DUSP1;ANXA1;GATA3
GO:0007162	negative regulation of cell adhesion	257	8	2.59393	0.0125584	CORO1C;DTX1;ALOX12;SEMA5A;DUSP1;ZNF703;ANXA1;ASS1
GO:1904036	negative regulation of epithelial cell apoptotic process	41	3	6.09732	0.0129851	SEMA5A;GATA3;TCF7L2
GO:0033048	negative regulation of mitotic sister chromatid segregation	41	3	6.09732	0.0129851	TEX14;NDC80;DUSP1
GO:0072594	establishment of protein localization to organelle	537	13	2.0173	0.0130227	RAN;HSP90AA1;ZFAND6;RPL26;PMAIP1;NDUFA13;NXT2;RPL24;RPL34;TOMM7;TXN;RPL35;RPS24
GO:0072332	intrinsic apoptotic signaling pathway by p53 class mediator	76	4	4.38579	0.0131911	IFI16;TRIAP1;RPL26;PMAIP1
GO:0050776	regulation of immune response	909	19	1.74177	0.013287	NLRP3;IFI16;FCER1A;SUMO1;C12orf4;C3AR1;UBE2N;PPP2R3C;HSP90AA1;IFIH1;FFAR2;FPR3;OSCAR;TLR7;TLR8;PARP9;CXCL13;ANXA1;GATA3
GO:0090150	establishment of protein localization to membrane	313	9	2.39607	0.0134837	BLZF1;HSP90AA1;RPL26;PMAIP1;NDUFA13;RPL24;RPL34;RPL35;RPS24
GO:0045619	regulation of lymphocyte differentiation	162	6	3.0863	0.0135463	NLRP3;DTX1;PPP2R3C;EGR3;ANXA1;GATA3
GO:0051726	regulation of cell cycle	1106	22	1.65756	0.0135765	WNT4;NR4A1;TRIAP1;DLGAP5;VASH1;HSP90AA1;CCL2;TEX14;RPL26;NDC80;UBE2E1;UBA3;RPL24;CEP70;EGF;NPM1;DUSP1;ZNF703;TMEM8B;ANXA1;GATA3;TCF7L2
GO:0032352	positive regulation of hormone metabolic process	15	2	11.1107	0.0135767	WNT4;GATA3
GO:0009208	pyrimidine ribonucleoside triphosphate metabolic process	15	2	11.1107	0.0135767	NME1;NME2
GO:0002830	positive regulation of type 2 immune response	15	2	11.1107	0.0135767	NLRP3;GATA3
GO:2001028	positive regulation of endothelial cell chemotaxis	15	2	11.1107	0.0135767	TMSB4X;SEMA5A
GO:0032736	positive regulation of interleukin-13 production	15	2	11.1107	0.0135767	NLRP3;GATA3
GO:0000054	ribosomal subunit export from nucleus	15	2	11.1107	0.0135767	RAN;NPM1
GO:0033750	ribosome localization	15	2	11.1107	0.0135767	RAN;NPM1
GO:1904035	regulation of epithelial cell apoptotic process	77	4	4.32883	0.0137866	CCL2;SEMA5A;GATA3;TCF7L2
GO:0010950	positive regulation of endopeptidase activity	163	6	3.06736	0.0139279	NLRP3;IFI16;CASP5;PMAIP1;NDUFA13;ARL6IP5
GO:0044283	small molecule biosynthetic process	724	16	1.84155	0.0139314	WNT4;PLA2G4A;COQ5;RAN;MDH1;UGP2;ST20-MTHFS;NME1;NME2;MPO;ALOX12;ASNSD1;ABCG1;EGF;ANXA1;ASS1
GO:0002684	positive regulation of immune system process	979	20	1.70235	0.0140775	NLRP3;IFI16;C12orf4;C3AR1;UBE2N;PPP2R3C;HSP90AA1;DYSF;CCL2;CCL8;IFIH1;FFAR2;FPR3;TLR7;TLR8;PARP9;CXCL13;EGR3;ANXA1;GATA3
GO:0010632	regulation of epithelial cell migration	212	7	2.75146	0.0142106	CORO1C;VASH1;TMSB4X;CXCL13;SEMA5A;ANXA1;GATA3
GO:0034109	homotypic cell-cell adhesion	78	4	4.27333	0.0143988	PEAR1;ALOX12;MYL12A;ZNF703
GO:0032652	regulation of interleukin-1 production	78	4	4.27333	0.0143988	NLRP3;IFI16;TLR8;ANXA1
GO:0006952	defense response	1518	28	1.53705	0.014555	NLRP3;PTGFR;IFI44L;IFI16;NCF2;SUMO1;C3AR1;UBE2N;CCL2;CCL8;MPO;PMAIP1;IFIH1;FFAR2;FPR3;TGM2;TLR7;TLR8;TMSB4X;TBC1D23;PARP9;CXCL13;CAPZA2;ANXA1;ASS1;GATA3;LIPA;IFIT1B
GO:0050673	epithelial cell proliferation	372	10	2.24005	0.014576	NR4A1;VASH1;DYSF;CCL2;NME1;NME2;SEMA5A;EGR3;ZNF703;GATA3
GO:0033554	cellular response to stress	1867	33	1.47289	0.0146675	GPR37L1;UBE2T;WNT4;IFI16;SUMO1;RECQL;ST8SIA1;RAD51AP1;UBE2N;TRIAP1;TPT1;PSMC6;VASH1;GSKIP;HSP90AA1;DYSF;COPS2;BCL2A1;CCL2;NME2;MPO;RPL26;PMAIP1;ARL6IP5;PARP9;ACTL6A;NPM1;DUSP1;TOMM7;OXR1;ANXA1;TXN;ASS1
GO:0007093	mitotic cell cycle checkpoint	165	6	3.03018	0.0147135	TRIAP1;TEX14;RPL26;NDC80;RPL24;DUSP1
GO:0033046	negative regulation of sister chromatid segregation	43	3	5.81372	0.0147732	TEX14;NDC80;DUSP1
GO:0000184	nuclear-transcribed mRNA catabolic process, nonsense-mediated decay	120	5	3.47208	0.0148622	RPL26;RPL24;RPL34;RPL35;RPS24
GO:0046470	phosphatidylcholine metabolic process	79	4	4.21924	0.015028	PLA2G4A;PLB1;LPCAT2;HRASLS
GO:0033045	regulation of sister chromatid segregation	79	4	4.21924	0.015028	DLGAP5;TEX14;NDC80;DUSP1
GO:0016192	vesicle-mediated transport	1942	34	1.45892	0.0151366	RIMS3;SLC2A5;PEAR1;BLZF1;NCF2;TCN1;ERGIC2;C12orf4;OTOF;C3AR1;WASHC3;CORO1C;HSP90AA1;TNFAIP2;DYSF;CCL2;CCL8;NME1;NME2;MPO;GMFG;OSCAR;TGM2;PRDX4;SYTL4;TMSB4X;TBC1D23;EGF;PACSIN1;VPS50;CAPZA2;ASAH1;ANXA1;EXOC6
GO:0045321	leukocyte activation	1184	23	1.61874	0.0151472	WNT4;NLRP3;SLC2A5;TCN1;C12orf4;C3AR1;DTX1;PPP2R3C;HSP90AA1;DYSF;CCL2;NME2;MPO;GMFG;OSCAR;PREX1;PRDX4;TLR7;TLR8;EGR3;ASAH1;ANXA1;GATA3
GO:0006979	response to oxidative stress	431	11	2.12675	0.0151822	GPR37L1;GSKIP;GNAO1;NME2;MPO;PRDX4;ARL6IP5;DUSP1;OXR1;ANXA1;TXN
GO:0045072	regulation of interferon-gamma biosynthetic process	16	2	10.4162	0.0153949	TLR7;TLR8
GO:0040037	negative regulation of fibroblast growth factor receptor signaling pathway	16	2	10.4162	0.0153949	WNT4;GATA3
GO:2000146	negative regulation of cell motility	267	8	2.49678	0.0154854	WNT4;CORO1C;VASH1;CCL2;MITF;CXCL13;DUSP1;GATA3
GO:0010629	negative regulation of gene expression	1734	31	1.48975	0.0154884	WNT4;DNAJB4;IFI16;SUMO1;RAN;DYSF;COPS2;NME1;TNRC6C;RPL26;LSM7;PPP1R13L;ZNF154;FASTKD1;CIR1;NDUFA13;PHF6;UBA3;MITF;RPL24;PARP9;RPL34;EXOSC9;NPM1;ZNF703;LSM1;TXN;RPL35;RPS24;GATA3;TCF7L2
GO:0007188	adenylate cyclase-modulating G protein-coupled receptor signaling pathway	216	7	2.70051	0.0155989	GPR37L1;PTGFR;RGS1;ADGRD1;GNAO1;NME2;ARRDC3
GO:0032755	positive regulation of interleukin-6 production	80	4	4.1665	0.0156744	IFIH1;TLR7;TLR8;TBC1D23
GO:1900408	negative regulation of cellular response to oxidative stress	44	3	5.68159	0.0157168	GPR37L1;OXR1;TXN
GO:1903202	negative regulation of oxidative stress-induced cell death	44	3	5.68159	0.0157168	GPR37L1;OXR1;TXN
GO:0051985	negative regulation of chromosome segregation	44	3	5.68159	0.0157168	TEX14;NDC80;DUSP1
GO:0042771	intrinsic apoptotic signaling pathway in response to DNA damage by p53 class mediator	44	3	5.68159	0.0157168	IFI16;TRIAP1;RPL26
GO:0045582	positive regulation of T cell differentiation	81	4	4.11506	0.0163379	NLRP3;EGR3;ANXA1;GATA3
GO:1901991	negative regulation of mitotic cell cycle phase transition	169	6	2.95846	0.0163763	TRIAP1;CCL2;TEX14;RPL26;NDC80;DUSP1
GO:0090068	positive regulation of cell cycle process	270	8	2.46904	0.0164527	WNT4;TRIAP1;DLGAP5;RPL26;NDC80;EGF;NPM1;ANXA1
GO:0032757	positive regulation of interleukin-8 production	45	3	5.55533	0.0166936	FFAR2;TLR7;TLR8
GO:0050709	negative regulation of protein secretion	124	5	3.36008	0.016904	NLRP3;SYTL4;TLR8;TMSB4X;ANXA1
GO:0001667	ameboidal-type cell migration	381	10	2.18714	0.0169426	TMEM201;NR4A1;CORO1C;VASH1;TMSB4X;CXCL13;SEMA5A;EGR3;ANXA1;GATA3
GO:0030334	regulation of cell migration	804	17	1.76195	0.0169459	WNT4;C3AR1;CORO1C;VASH1;DYSF;CCL2;CCL8;PREX1;TMSB4X;MITF;CXCL13;EGF;SEMA5A;DUSP1;ZNF703;ANXA1;GATA3
GO:0042592	homeostatic process	1817	32	1.46756	0.0170141	HCRTR1;PTGFR;PRIM1;C3AR1;KSR2;TPT1;PPP2R3C;HSP90AA1;DMXL2;CCL2;CCL8;NME1;NME2;TSPOAP1;ALOX12;PMAIP1;FFAR2;PPP1R13L;FPR3;TGM2;ABCG1;PRDX4;CXCL13;ARRDC3;ANXA1;TXN;ATP6V1G1;RPS24;GATA3;LIPA;TCF7L2;GLRX3
GO:0043651	linoleic acid metabolic process	17	2	9.80353	0.0173112	CYP2J2;ALOX12
GO:0032717	negative regulation of interleukin-8 production	17	2	9.80353	0.0173112	TMSB4X;ANXA1
GO:0010893	positive regulation of steroid biosynthetic process	17	2	9.80353	0.0173112	WNT4;ABCG1
GO:0002689	negative regulation of leukocyte chemotaxis	17	2	9.80353	0.0173112	CCL2;DUSP1
GO:0042095	interferon-gamma biosynthetic process	17	2	9.80353	0.0173112	TLR7;TLR8
GO:1901032	negative regulation of response to reactive oxygen species	17	2	9.80353	0.0173112	GPR37L1;TXN
GO:1903206	negative regulation of hydrogen peroxide-induced cell death	17	2	9.80353	0.0173112	GPR37L1;TXN
GO:2001039	negative regulation of cellular response to drug	17	2	9.80353	0.0173112	GPR37L1;TXN
GO:0071428	rRNA-containing ribonucleoprotein complex export from nucleus	17	2	9.80353	0.0173112	RAN;NPM1
GO:0050715	positive regulation of cytokine secretion	125	5	3.3332	0.0174421	NLRP3;IFIH1;FFAR2;TLR8;GATA3
GO:0043280	positive regulation of cysteine-type endopeptidase activity involved in apoptotic process	125	5	3.3332	0.0174421	NLRP3;CASP5;PMAIP1;NDUFA13;ARL6IP5
GO:0098609	cell-cell adhesion	807	17	1.7554	0.0175081	WNT4;NLRP3;PEAR1;DTX1;CCL2;ALOX12;MYL12A;CDH4;ITGB5;CXCL13;PCDHGA6;PCDHGA11;EGR3;ZNF703;ANXA1;ASS1;GATA3
GO:0001944	vasculature development	682	15	1.83277	0.0176889	WNT4;NR4A1;C3AR1;VASH1;TNFAIP2;DYSF;CCL2;CCL8;SAT1;CXCL13;EGF;SEMA5A;EGR3;ANXA1;TCF7L2
GO:1901068	guanosine-containing compound metabolic process	46	3	5.43457	0.0177038	RAN;NME1;NME2
GO:1902883	negative regulation of response to oxidative stress	46	3	5.43457	0.0177038	GPR37L1;OXR1;TXN
GO:0046456	icosanoid biosynthetic process	46	3	5.43457	0.0177038	PLA2G4A;ALOX12;ANXA1
GO:0043370	regulation of CD4-positive, alpha-beta T cell differentiation	46	3	5.43457	0.0177038	NLRP3;ANXA1;GATA3
GO:0032732	positive regulation of interleukin-1 production	46	3	5.43457	0.0177038	NLRP3;IFI16;TLR8
GO:0008064	regulation of actin polymerization or depolymerization	173	6	2.89006	0.0181647	TWF1;GMFG;PREX1;TMSB4X;SEMA5A;CAPZA2
GO:0030041	actin filament polymerization	173	6	2.89006	0.0181647	TWF1;WASHC3;GMFG;PREX1;TMSB4X;CAPZA2
GO:0030832	regulation of actin filament length	174	6	2.87345	0.0186319	TWF1;GMFG;PREX1;TMSB4X;SEMA5A;CAPZA2
GO:0051224	negative regulation of protein transport	174	6	2.87345	0.0186319	NLRP3;SYTL4;TLR8;TMSB4X;ANXA1;TXN
GO:0009205	purine ribonucleoside triphosphate metabolic process	277	8	2.40664	0.0188787	COX6A1;RAN;COX5B;NME1;NME2;TMSB4X;COX7A2;NDUFB2
GO:0007015	actin filament organization	388	10	2.14768	0.0189718	WNT4;TWF1;WASHC3;GMFG;PREX1;TMSB4X;ITGB5;SEMA5A;PACSIN1;CAPZA2
GO:0030036	actin cytoskeleton organization	626	14	1.86361	0.0189903	WNT4;TWF1;WASHC3;CORO1C;RAN;PLEK2;GMFG;PREX1;TMSB4X;ITGB5;SEMA5A;PACSIN1;CAPZA2;ANXA1
GO:0034599	cellular response to oxidative stress	278	8	2.39799	0.0192451	GPR37L1;GSKIP;NME2;MPO;ARL6IP5;OXR1;ANXA1;TXN
GO:0007252	I-kappaB phosphorylation	18	2	9.25889	0.0193231	PRDX4;TLR7
GO:0060749	mammary gland alveolus development	18	2	9.25889	0.0193231	SOCS2;EGF
GO:0061377	mammary gland lobule development	18	2	9.25889	0.0193231	SOCS2;EGF
GO:0002726	positive regulation of T cell cytokine production	18	2	9.25889	0.0193231	NLRP3;GATA3
GO:0033599	regulation of mammary gland epithelial cell proliferation	18	2	9.25889	0.0193231	ZNF703;GATA3
GO:1902165	regulation of intrinsic apoptotic signaling pathway in response to DNA damage by p53 class mediator	18	2	9.25889	0.0193231	TRIAP1;RPL26
GO:0009148	pyrimidine nucleoside triphosphate biosynthetic process	18	2	9.25889	0.0193231	NME1;NME2
GO:0043254	regulation of protein complex assembly	447	11	2.05063	0.0193391	SUMO1;TWF1;PSMC6;HSP90AA1;PMAIP1;GMFG;PREX1;TMSB4X;MITF;CXCL13;CAPZA2
GO:0042254	ribosome biogenesis	279	8	2.38939	0.0196166	RAN;RPL26;RPL24;EXOSC9;NPM1;RPL26L1;RPL35;RPS24
GO:0072358	cardiovascular system development	691	15	1.8089	0.0196516	WNT4;NR4A1;C3AR1;VASH1;TNFAIP2;DYSF;CCL2;CCL8;SAT1;CXCL13;EGF;SEMA5A;EGR3;ANXA1;TCF7L2
GO:1904950	negative regulation of establishment of protein localization	177	6	2.82475	0.0200827	NLRP3;SYTL4;TLR8;TMSB4X;ANXA1;TXN
GO:0002366	leukocyte activation involved in immune response	693	15	1.80368	0.0201095	NLRP3;SLC2A5;TCN1;C12orf4;C3AR1;HSP90AA1;DYSF;NME2;MPO;GMFG;OSCAR;PRDX4;ASAH1;ANXA1;GATA3
GO:0045785	positive regulation of cell adhesion	392	10	2.12577	0.0202088	WNT4;NLRP3;DYSF;CCL2;TGM2;PREX1;CXCL13;EGR3;ANXA1;GATA3
GO:0050921	positive regulation of chemotaxis	130	5	3.205	0.0203029	C3AR1;DYSF;TMSB4X;CXCL13;SEMA5A
GO:0060828	regulation of canonical Wnt signaling pathway	228	7	2.55838	0.0203396	GSKIP;IFT20;EGF;SEMA5A;TMEM170B;ZNF703;TCF7L2
GO:0072511	divalent inorganic cation transport	451	11	2.03244	0.0204991	TCN1;SUMO1;NMUR1;TPT1;DYSF;GNAO1;CCL2;CCL8;TMEM163;TCN2;EGF
GO:0008283	cell proliferation	1986	34	1.4266	0.0205181	GPR37L1;WNT4;PTGFR;IFI16;BLZF1;PLA2G4A;ST8SIA1;NR4A1;EMP1;DLGAP5;VASH1;DYSF;COPS2;IFT20;CCL2;CCL8;NME1;NME2;MED31;TGM2;PRDX4;SAT1;MITF;EGF;SEMA5A;NPM1;DUSP1;EGR3;ZNF703;ANXA1;TXN;GATA3;LIPA;TCF7L2
GO:0006611	protein export from nucleus	178	6	2.80888	0.0205829	NUP37;RAN;THOC7;NPM1;TXN;TCF7L2
GO:2000116	regulation of cysteine-type endopeptidase activity	229	7	2.54721	0.0207754	NLRP3;IFI16;CASP5;TRIAP1;PMAIP1;NDUFA13;ARL6IP5
GO:0042542	response to hydrogen peroxide	131	5	3.18053	0.0209097	GPR37L1;GNAO1;DUSP1;ANXA1;TXN
GO:0002792	negative regulation of peptide secretion	131	5	3.18053	0.0209097	NLRP3;SYTL4;TLR8;TMSB4X;ANXA1
GO:0051181	cofactor transport	49	3	5.10184	0.0209349	TCN1;TCN2;SLC25A20
GO:0032648	regulation of interferon-beta production	49	3	5.10184	0.0209349	IFIH1;TLR7;TLR8
GO:0002263	cell activation involved in immune response	697	15	1.79333	0.0210496	NLRP3;SLC2A5;TCN1;C12orf4;C3AR1;HSP90AA1;DYSF;NME2;MPO;GMFG;OSCAR;PRDX4;ASAH1;ANXA1;GATA3
GO:0009199	ribonucleoside triphosphate metabolic process	283	8	2.35562	0.0211537	COX6A1;RAN;COX5B;NME1;NME2;TMSB4X;COX7A2;NDUFB2
GO:0030217	T cell differentiation	230	7	2.53613	0.0212176	WNT4;NLRP3;DTX1;PREX1;EGR3;ANXA1;GATA3
GO:0051016	barbed-end actin filament capping	19	2	8.77158	0.0214279	TWF1;CAPZA2
GO:0018904	ether metabolic process	19	2	8.77158	0.0214279	ALOX12;TXN
GO:0009144	purine nucleoside triphosphate metabolic process	284	8	2.34732	0.0215509	COX6A1;RAN;COX5B;NME1;NME2;TMSB4X;COX7A2;NDUFB2
GO:0031347	regulation of defense response	701	15	1.7831	0.0220228	NLRP3;IFI16;SUMO1;C3AR1;UBE2N;IFIH1;FFAR2;TGM2;TLR7;TLR8;TMSB4X;TBC1D23;PARP9;ANXA1;GATA3
GO:0030834	regulation of actin filament depolymerization	50	3	4.9998	0.0220789	TWF1;SEMA5A;CAPZA2
GO:0010952	positive regulation of peptidase activity	181	6	2.76232	0.0221342	NLRP3;IFI16;CASP5;PMAIP1;NDUFA13;ARL6IP5
GO:0045580	regulation of T cell differentiation	133	5	3.13271	0.0221585	NLRP3;DTX1;EGR3;ANXA1;GATA3
GO:0032612	interleukin-1 production	89	4	3.74517	0.0222822	NLRP3;IFI16;TLR8;ANXA1
GO:1990542	mitochondrial transmembrane transport	89	4	3.74517	0.0222822	COX5B;NDUFA13;SLC25A20;TOMM7
GO:0051304	chromosome separation	89	4	3.74517	0.0222822	DLGAP5;TEX14;NDC80;DUSP1
GO:0051051	negative regulation of transport	458	11	2.00138	0.0226517	NLRP3;SUMO1;DYSF;GNAO1;SYTL4;TLR8;TMSB4X;ARL6IP5;EGF;ANXA1;TXN
GO:0070647	protein modification by small protein conjugation or removal	1029	20	1.61963	0.0227822	UBE2T;NLRP3;SUMO1;SOCS2;UBE2N;DTX1;LRR1;PSMC6;HSP90AA1;DYSF;COPS2;KLHL25;MED31;IFIH1;UBE2E1;UBA3;ACTL6A;ARRDC3;RNF217;GATA3
GO:0043547	positive regulation of GTPase activity	400	10	2.08325	0.0228587	WNT4;RGS1;CORO1C;GNAO1;ADAP2;CCL2;CCL8;PREX1;CXCL13;FAM13A
GO:0007155	cell adhesion	1369	25	1.52173	0.0230078	WNT4;NLRP3;PEAR1;CORO1C;DTX1;DYSF;CCL2;NME2;ALOX12;MYL12A;TGM2;PREX1;CDH4;ITGB5;CXCL13;SEMA5A;PCDHGA6;PCDHGA11;DUSP1;EGR3;ZNF703;TMEM8B;ANXA1;ASS1;GATA3
GO:2000351	regulation of endothelial cell apoptotic process	51	3	4.90176	0.0232565	CCL2;SEMA5A;GATA3
GO:0019369	arachidonic acid metabolic process	51	3	4.90176	0.0232565	CYP2J2;PLA2G4A;ALOX12
GO:0045839	negative regulation of mitotic nuclear division	51	3	4.90176	0.0232565	TEX14;NDC80;DUSP1
GO:0002720	positive regulation of cytokine production involved in immune response	51	3	4.90176	0.0232565	NLRP3;FFAR2;GATA3
GO:0032608	interferon-beta production	51	3	4.90176	0.0232565	IFIH1;TLR7;TLR8
GO:0042401	cellular biogenic amine biosynthetic process	20	2	8.333	0.0236233	HDC;SAT1
GO:0003215	cardiac right ventricle morphogenesis	20	2	8.333	0.0236233	PPP1R13L;GATA3
GO:0009713	catechol-containing compound biosynthetic process	20	2	8.333	0.0236233	HDC;GATA3
GO:0042423	catecholamine biosynthetic process	20	2	8.333	0.0236233	HDC;GATA3
GO:0060231	mesenchymal to epithelial transition	20	2	8.333	0.0236233	WNT4;GATA3
GO:0048245	eosinophil chemotaxis	20	2	8.333	0.0236233	CCL2;CCL8
GO:0034097	response to cytokine	1100	21	1.59085	0.0236425	IFI16;SUMO1;SOCS2;UBE2N;DTX1;HSP90AA1;ZFAND6;GNAO1;CCL2;CCL8;TEX14;IFIH1;NDUFA13;TMSB4X;PARP9;CXCL13;DUSP1;ANXA1;ASS1;GATA3;IFIT1B
GO:0055114	oxidation-reduction process	968	19	1.63561	0.0239352	CYP2J2;NCF2;ALDH2;COX6A1;MDH1;UGP2;COX5B;AOC2;MPO;ALOX12;FASTKD1;NDUFA13;PRDX4;COX7A2;ECHDC1;NDUFB2;OXR1;TXN;GLRX3
GO:0051494	negative regulation of cytoskeleton organization	136	5	3.0636	0.024121	TWF1;GMFG;TMSB4X;NPM1;CAPZA2
GO:0006584	catecholamine metabolic process	52	3	4.8075	0.0244676	HDC;AOC2;GATA3
GO:0009712	catechol-containing compound metabolic process	52	3	4.8075	0.0244676	HDC;AOC2;GATA3
GO:2000242	negative regulation of reproductive process	52	3	4.8075	0.0244676	WNT4;PRDX4;DUSP1
GO:0035924	cellular response to vascular endothelial growth factor stimulus	52	3	4.8075	0.0244676	NR4A1;EGR3;ANXA1
GO:0043331	response to dsRNA	52	3	4.8075	0.0244676	PMAIP1;IFIH1;NPM1
GO:0022610	biological adhesion	1377	25	1.51289	0.0244968	WNT4;NLRP3;PEAR1;CORO1C;DTX1;DYSF;CCL2;NME2;ALOX12;MYL12A;TGM2;PREX1;CDH4;ITGB5;CXCL13;SEMA5A;PCDHGA6;PCDHGA11;DUSP1;EGR3;ZNF703;TMEM8B;ANXA1;ASS1;GATA3
GO:0051336	regulation of hydrolase activity	1241	23	1.54439	0.0247708	WNT4;NLRP3;DNAJB4;IFI16;RGS1;CASP5;SUMO1;NMUR1;CORO1C;TRIAP1;GNAO1;ADAP2;CCL2;CCL8;PMAIP1;NDUFA13;PREX1;TMSB4X;ARL6IP5;CXCL13;FAM13A;NPM1;ANXA1
GO:0070972	protein localization to endoplasmic reticulum	137	5	3.04124	0.0247993	RPL26;RPL24;RPL34;RPL35;RPS24
GO:0001938	positive regulation of endothelial cell proliferation	92	4	3.62304	0.0248097	NR4A1;DYSF;SEMA5A;EGR3
GO:2001022	positive regulation of response to DNA damage stimulus	92	4	3.62304	0.0248097	UBE2N;RPL26;PMAIP1;PARP9
GO:1901988	negative regulation of cell cycle phase transition	186	6	2.68806	0.0248917	TRIAP1;CCL2;TEX14;RPL26;NDC80;DUSP1
GO:0032103	positive regulation of response to external stimulus	293	8	2.27522	0.0253673	C3AR1;DYSF;FFAR2;TGM2;TLR7;TMSB4X;CXCL13;SEMA5A
GO:0071478	cellular response to radiation	187	6	2.67369	0.0254696	IFI16;RAD51AP1;TRIAP1;RPL26;NPM1;GATA3
GO:1903364	positive regulation of cellular protein catabolic process	138	5	3.0192	0.0254897	SUMO1;PSMC6;HSP90AA1;EGF;RNF217
GO:1990868	response to chemokine	93	4	3.58409	0.025689	CCL2;CCL8;CXCL13;DUSP1
GO:1990869	cellular response to chemokine	93	4	3.58409	0.025689	CCL2;CCL8;CXCL13;DUSP1
GO:0030029	actin filament-based process	715	15	1.74818	0.0256991	WNT4;SUMO1;TWF1;WASHC3;CORO1C;RAN;PLEK2;GMFG;PREX1;TMSB4X;ITGB5;SEMA5A;PACSIN1;CAPZA2;ANXA1
GO:0030042	actin filament depolymerization	53	3	4.71679	0.0257122	TWF1;SEMA5A;CAPZA2
GO:0043392	negative regulation of DNA binding	53	3	4.71679	0.0257122	IFI16;SUMO1;TMSB4X
GO:0009309	amine biosynthetic process	21	2	7.93619	0.0259068	HDC;SAT1
GO:0045624	positive regulation of T-helper cell differentiation	21	2	7.93619	0.0259068	NLRP3;ANXA1
GO:0035743	CD4-positive, alpha-beta T cell cytokine production	21	2	7.93619	0.0259068	NLRP3;GATA3
GO:1901798	positive regulation of signal transduction by p53 class mediator	21	2	7.93619	0.0259068	RPL26;PMAIP1
GO:0046132	pyrimidine ribonucleoside biosynthetic process	21	2	7.93619	0.0259068	NME1;NME2
GO:0071359	cellular response to dsRNA	21	2	7.93619	0.0259068	IFIH1;NPM1
GO:0034162	toll-like receptor 9 signaling pathway	21	2	7.93619	0.0259068	TLR7;TLR8
GO:0034332	adherens junction organization	139	5	2.99748	0.0261924	WNT4;RASSF8;CORO1C;CDH4;ZNF703
GO:0006091	generation of precursor metabolites and energy	469	11	1.95443	0.0263634	NCF2;ALDH2;COX6A1;MDH1;UGP2;COX5B;AOC2;FASTKD1;COX7A2;NDUFB2;GLRX3
GO:0045055	regulated exocytosis	783	16	1.70278	0.026738	RIMS3;SLC2A5;TCN1;C12orf4;OTOF;C3AR1;HSP90AA1;NME2;MPO;GMFG;OSCAR;PRDX4;SYTL4;TMSB4X;EGF;ASAH1
GO:0071396	cellular response to lipid	593	13	1.8268	0.0269116	NLRP3;PTGFR;NR4A1;RAN;CCL2;NME1;NME2;FFAR2;NDUFA13;CXCL13;ZNF703;ANXA1;ASS1
GO:0002042	cell migration involved in sprouting angiogenesis	54	3	4.62944	0.0269903	NR4A1;EGR3;ANXA1
GO:0017001	antibiotic catabolic process	54	3	4.62944	0.0269903	ALDH2;MPO;PRDX4
GO:0032781	positive regulation of ATPase activity	54	3	4.62944	0.0269903	DNAJB4;SUMO1;TMSB4X
GO:0030335	positive regulation of cell migration	472	11	1.94201	0.0274482	C3AR1;DYSF;CCL8;PREX1;TMSB4X;CXCL13;EGF;SEMA5A;ZNF703;ANXA1;GATA3
GO:0010595	positive regulation of endothelial cell migration	95	4	3.50863	0.0275036	TMSB4X;SEMA5A;ANXA1;GATA3
GO:2001243	negative regulation of intrinsic apoptotic signaling pathway	95	4	3.50863	0.0275036	TRIAP1;TPT1;BCL2A1;NDUFA13
GO:0019725	cellular homeostasis	917	18	1.6357	0.0275779	HCRTR1;PTGFR;PRIM1;C3AR1;TPT1;DMXL2;CCL2;CCL8;NME1;NME2;TSPOAP1;FPR3;TGM2;PRDX4;CXCL13;TXN;ATP6V1G1;GLRX3
GO:0044281	small molecule metabolic process	1960	33	1.40301	0.0277217	WNT4;CYP2J2;PLA2G4A;TCN1;PLB1;ALDH2;COX6A1;COQ5;RAN;MDH1;UGP2;DYSF;HDC;ST20-MTHFS;COX5B;NME1;NME2;MPO;ALOX12;PMAIP1;ASNSD1;ABCG1;TCN2;PRDX4;TMSB4X;PARP9;EGF;COX7A2;ECHDC1;NDUFB2;ANXA1;TXN;ASS1
GO:0098542	defense response to other organism	473	11	1.93791	0.0278168	NLRP3;IFI44L;IFI16;MPO;PMAIP1;IFIH1;TLR7;TLR8;PARP9;CXCL13;IFIT1B
GO:0010874	regulation of cholesterol efflux	22	2	7.57545	0.0282759	ABCG1;EGF
GO:0042451	purine nucleoside biosynthetic process	22	2	7.57545	0.0282759	NME1;NME2
GO:0046129	purine ribonucleoside biosynthetic process	22	2	7.57545	0.0282759	NME1;NME2
GO:0032656	regulation of interleukin-13 production	22	2	7.57545	0.0282759	NLRP3;GATA3
GO:1901223	negative regulation of NIK/NF-kappaB signaling	22	2	7.57545	0.0282759	NLRP3;TMSB4X
GO:0009147	pyrimidine nucleoside triphosphate metabolic process	22	2	7.57545	0.0282759	NME1;NME2
GO:0009220	pyrimidine ribonucleotide biosynthetic process	22	2	7.57545	0.0282759	NME1;NME2
GO:0009235	cobalamin metabolic process	22	2	7.57545	0.0282759	TCN1;TCN2
GO:0032674	regulation of interleukin-5 production	22	2	7.57545	0.0282759	NLRP3;GATA3
GO:0030837	negative regulation of actin filament polymerization	55	3	4.54527	0.0283018	TWF1;TMSB4X;CAPZA2
GO:1902107	positive regulation of leukocyte differentiation	142	5	2.93415	0.0283742	NLRP3;PPP2R3C;EGR3;ANXA1;GATA3
GO:0007200	phospholipase C-activating G protein-coupled receptor signaling pathway	96	4	3.47208	0.0284388	NMUR1;C3AR1;FPR3;TGM2
GO:0051168	nuclear export	192	6	2.60406	0.0284928	NUP37;RAN;THOC7;NPM1;TXN;TCF7L2
GO:0009628	response to abiotic stimulus	1123	21	1.55826	0.028797	DNAJB4;IFI16;CASP5;SUMO1;ST8SIA1;RAD51AP1;TRIAP1;HSP90AA1;DYSF;IFT20;MPO;RPL26;PMAIP1;TLR7;TLR8;NPM1;DUSP1;ANXA1;TXN;ATP6V1G1;GATA3
GO:0002683	negative regulation of immune system process	416	10	2.00312	0.0289009	IFI16;DTX1;CCL2;NME1;NME2;DUSP1;HLA-DOB;TMEM176A;TMEM176B;ANXA1
GO:0030097	hemopoiesis	791	16	1.68556	0.028996	WNT4;NLRP3;IFI16;DTX1;PPP2R3C;NME1;NME2;TNRC6C;OSCAR;PREX1;MITF;TMEM176A;TMEM176B;EGR3;ANXA1;GATA3
GO:0002275	myeloid cell activation involved in immune response	539	12	1.85521	0.0296364	SLC2A5;TCN1;C12orf4;C3AR1;HSP90AA1;DYSF;NME2;MPO;GMFG;OSCAR;PRDX4;ASAH1
GO:0072577	endothelial cell apoptotic process	56	3	4.46411	0.0296467	CCL2;SEMA5A;GATA3
GO:2000514	regulation of CD4-positive, alpha-beta T cell activation	56	3	4.46411	0.0296467	NLRP3;ANXA1;GATA3
GO:0042093	T-helper cell differentiation	56	3	4.46411	0.0296467	NLRP3;ANXA1;GATA3
GO:0001819	positive regulation of cytokine production	418	10	1.99354	0.0297291	NLRP3;IFI16;C3AR1;IFIH1;FFAR2;TLR7;TLR8;TBC1D23;ANXA1;GATA3
GO:0035295	tube development	992	19	1.59604	0.0297837	WNT4;CLMP;NR4A1;C3AR1;VASH1;TNFAIP2;DYSF;CCL2;CCL8;TGM2;SAT1;CXCL13;EGF;SEMA5A;EGR3;ANXA1;ASS1;GATA3;LIPA
GO:0050727	regulation of inflammatory response	361	9	2.07748	0.0305045	NLRP3;C3AR1;FFAR2;TGM2;TLR7;TMSB4X;TBC1D23;ANXA1;GATA3
GO:0009141	nucleoside triphosphate metabolic process	304	8	2.19289	0.0306448	COX6A1;RAN;COX5B;NME1;NME2;TMSB4X;COX7A2;NDUFB2
GO:0090023	positive regulation of neutrophil chemotaxis	23	2	7.24609	0.0307283	C3AR1;DYSF
GO:0032753	positive regulation of interleukin-4 production	23	2	7.24609	0.0307283	NLRP3;GATA3
GO:1903205	regulation of hydrogen peroxide-induced cell death	23	2	7.24609	0.0307283	GPR37L1;TXN
GO:0032634	interleukin-5 production	23	2	7.24609	0.0307283	NLRP3;GATA3
GO:2000145	regulation of cell motility	863	17	1.64149	0.0308906	WNT4;C3AR1;CORO1C;VASH1;DYSF;CCL2;CCL8;PREX1;TMSB4X;MITF;CXCL13;EGF;SEMA5A;DUSP1;ZNF703;ANXA1;GATA3
GO:0050714	positive regulation of protein secretion	249	7	2.34261	0.030904	NLRP3;IFIH1;FFAR2;SYTL4;TLR8;GATA3;TCF7L2
GO:0009057	macromolecule catabolic process	1338	24	1.49471	0.0309087	LYPLAL1;SDC3;SUMO1;UBE2N;PSMC6;HSP90AA1;DYSF;KLHL25;TNRC6C;RPL26;PMAIP1;LSM7;FASTKD1;NDUFA13;UBE2E1;RPL24;RPL34;EGF;EXOSC9;NPM1;RNF217;LSM1;RPL35;RPS24
GO:1904019	epithelial cell apoptotic process	99	4	3.36687	0.0313573	CCL2;SEMA5A;GATA3;TCF7L2
GO:0110053	regulation of actin filament organization	250	7	2.33324	0.031484	WNT4;TWF1;GMFG;PREX1;TMSB4X;SEMA5A;CAPZA2
GO:0002573	myeloid leukocyte differentiation	197	6	2.53797	0.0317441	IFI16;NME1;NME2;OSCAR;MITF;GATA3
GO:0003012	muscle system process	423	10	1.96998	0.0318731	SUMO1;NMUR1;TWF1;DYSF;GNAO1;MYL12B;MYL12A;PPP1R13L;ITGB5;GLRX3
GO:0010876	lipid localization	365	9	2.05471	0.0323962	PLA2G4A;TRIAP1;DYSF;FFAR2;ABCG1;APOO;SLC25A20;EGF;ANXA1
GO:0031346	positive regulation of cell projection organization	365	9	2.05471	0.0323962	TWF1;CORO1C;PLEK2;NME1;NME2;CDH4;ZMYND10;SEMA5A;PACSIN1
GO:0002294	CD4-positive, alpha-beta T cell differentiation involved in immune response	58	3	4.31017	0.0324362	NLRP3;ANXA1;GATA3
GO:0030336	negative regulation of cell migration	252	7	2.31472	0.0326661	WNT4;CORO1C;VASH1;CCL2;MITF;CXCL13;DUSP1
GO:0097164	ammonium ion metabolic process	199	6	2.51246	0.0331097	PLA2G4A;PLB1;HDC;LPCAT2;SAT1;HRASLS
GO:0034110	regulation of homotypic cell-cell adhesion	24	2	6.94417	0.0332616	ALOX12;ZNF703
GO:0072677	eosinophil migration	24	2	6.94417	0.0332616	CCL2;CCL8
GO:0032616	interleukin-13 production	24	2	6.94417	0.0332616	NLRP3;GATA3
GO:0009218	pyrimidine ribonucleotide metabolic process	24	2	6.94417	0.0332616	NME1;NME2
GO:0051983	regulation of chromosome segregation	101	4	3.3002	0.0333974	DLGAP5;TEX14;NDC80;DUSP1
GO:0040012	regulation of locomotion	938	18	1.59908	0.0334218	WNT4;C3AR1;CORO1C;VASH1;DYSF;CCL2;CCL8;PREX1;TMSB4X;MITF;CXCL13;EGF;SEMA5A;ARRDC3;DUSP1;ZNF703;ANXA1;GATA3
GO:0035239	tube morphogenesis	806	16	1.65419	0.0336089	WNT4;NR4A1;C3AR1;VASH1;TNFAIP2;DYSF;CCL2;CCL8;TGM2;SAT1;CXCL13;EGF;SEMA5A;EGR3;ANXA1;GATA3
GO:0006650	glycerophospholipid metabolic process	368	9	2.03796	0.0338675	PLA2G4A;PLB1;SOCS2;LPCAT2;HRASLS;PYURF;PIGY;EGF;FAM126A
GO:0070527	platelet aggregation	59	3	4.23712	0.0338805	PEAR1;ALOX12;MYL12A
GO:0048247	lymphocyte chemotaxis	59	3	4.23712	0.0338805	CCL2;CCL8;CXCL13
GO:0002287	alpha-beta T cell activation involved in immune response	59	3	4.23712	0.0338805	NLRP3;ANXA1;GATA3
GO:0002293	alpha-beta T cell differentiation involved in immune response	59	3	4.23712	0.0338805	NLRP3;ANXA1;GATA3
GO:0051784	negative regulation of nuclear division	59	3	4.23712	0.0338805	TEX14;NDC80;DUSP1
GO:0010212	response to ionizing radiation	149	5	2.79631	0.0339036	IFI16;RAD51AP1;RPL26;ANXA1;GATA3
GO:0045596	negative regulation of cell differentiation	678	14	1.72068	0.0342948	GPR37L1;WNT4;CORO1C;DTX1;NME1;NME2;ABCG1;CRMP1;SEMA5A;TMEM176A;TMEM176B;LSM1;ANXA1;GATA3
GO:0035567	non-canonical Wnt signaling pathway	102	4	3.26784	0.0344458	WNT4;GNAO1;TNRC6C;TCF7L2
GO:0033559	unsaturated fatty acid metabolic process	102	4	3.26784	0.0344458	CYP2J2;PLA2G4A;ALOX12;ANXA1
GO:0051270	regulation of cellular component movement	942	18	1.59229	0.0346321	WNT4;SUMO1;C3AR1;CORO1C;VASH1;DYSF;CCL2;CCL8;PREX1;TMSB4X;MITF;CXCL13;EGF;SEMA5A;DUSP1;ZNF703;ANXA1;GATA3
GO:0032102	negative regulation of response to external stimulus	312	8	2.13667	0.0349275	WNT4;NLRP3;CCL2;ALOX12;CXCL13;SEMA5A;DUSP1;GATA3
GO:0045930	negative regulation of mitotic cell cycle	256	7	2.27855	0.0351185	TRIAP1;CCL2;TEX14;RPL26;NDC80;RPL24;DUSP1
GO:0051783	regulation of nuclear division	202	6	2.47515	0.0352286	WNT4;DLGAP5;TEX14;NDC80;EGF;DUSP1
GO:0010639	negative regulation of organelle organization	371	9	2.02148	0.0353845	TWF1;TRIAP1;TEX14;NDC80;GMFG;TMSB4X;NPM1;DUSP1;CAPZA2
GO:0072676	lymphocyte migration	103	4	3.23612	0.0355132	CCL2;CCL8;CXCL13;GATA3
GO:0002525	acute inflammatory response to non-antigenic stimulus	3	1	27.7767	0.0355732	FFAR2
GO:0002877	regulation of acute inflammatory response to non-antigenic stimulus	3	1	27.7767	0.0355732	FFAR2
GO:2001300	lipoxin metabolic process	3	1	27.7767	0.0355732	ALOX12
GO:2001301	lipoxin biosynthetic process	3	1	27.7767	0.0355732	ALOX12
GO:0060748	tertiary branching involved in mammary gland duct morphogenesis	3	1	27.7767	0.0355732	WNT4
GO:0071400	cellular response to oleic acid	3	1	27.7767	0.0355732	ASS1
GO:0071878	negative regulation of adenylate cyclase-activating adrenergic receptor signaling pathway	3	1	27.7767	0.0355732	ARRDC3
GO:0060129	thyroid-stimulating hormone-secreting cell differentiation	3	1	27.7767	0.0355732	WNT4
GO:0090031	positive regulation of steroid hormone biosynthetic process	3	1	27.7767	0.0355732	WNT4
GO:0007113	endomitotic cell cycle	3	1	27.7767	0.0355732	UBA3
GO:0097250	mitochondrial respiratory chain supercomplex assembly	3	1	27.7767	0.0355732	COX7A2
GO:0035684	helper T cell extravasation	3	1	27.7767	0.0355732	CCL2
GO:0010908	regulation of heparan sulfate proteoglycan biosynthetic process	3	1	27.7767	0.0355732	TCF7L2
GO:0010909	positive regulation of heparan sulfate proteoglycan biosynthetic process	3	1	27.7767	0.0355732	TCF7L2
GO:1902730	positive regulation of proteoglycan biosynthetic process	3	1	27.7767	0.0355732	TCF7L2
GO:0044336	canonical Wnt signaling pathway involved in negative regulation of apoptotic process	3	1	27.7767	0.0355732	MITF
GO:1901491	negative regulation of lymphangiogenesis	3	1	27.7767	0.0355732	VASH1
GO:0035898	parathyroid hormone secretion	3	1	27.7767	0.0355732	GATA3
GO:0001806	type IV hypersensitivity	3	1	27.7767	0.0355732	GATA3
GO:1901536	negative regulation of DNA demethylation	3	1	27.7767	0.0355732	GATA3
GO:2000611	positive regulation of thyroid hormone generation	3	1	27.7767	0.0355732	GATA3
GO:0002232	leukocyte chemotaxis involved in inflammatory response	3	1	27.7767	0.0355732	FFAR2
GO:0034436	glycoprotein transport	3	1	27.7767	0.0355732	ABCG1
GO:0097745	mitochondrial tRNA 5'-end processing	3	1	27.7767	0.0355732	TRMT10C
GO:1990180	mitochondrial tRNA 3'-end processing	3	1	27.7767	0.0355732	TRMT10C
GO:0002581	negative regulation of antigen processing and presentation of peptide or polysaccharide antigen via MHC class II	3	1	27.7767	0.0355732	HLA-DOB
GO:1902626	assembly of large subunit precursor of preribosome	3	1	27.7767	0.0355732	RPL24
GO:0018262	isopeptide cross-linking	3	1	27.7767	0.0355732	TGM2
GO:0006407	rRNA export from nucleus	3	1	27.7767	0.0355732	NPM1
GO:0034473	U1 snRNA 3'-end processing	3	1	27.7767	0.0355732	EXOSC9
GO:0034476	U5 snRNA 3'-end processing	3	1	27.7767	0.0355732	EXOSC9
GO:0006404	RNA import into nucleus	3	1	27.7767	0.0355732	RAN
GO:1902162	regulation of DNA damage response, signal transduction by p53 class mediator resulting in transcription of p21 class mediator	3	1	27.7767	0.0355732	RPL26
GO:1902164	positive regulation of DNA damage response, signal transduction by p53 class mediator resulting in transcription of p21 class mediator	3	1	27.7767	0.0355732	RPL26
GO:0009447	putrescine catabolic process	3	1	27.7767	0.0355732	SAT1
GO:0032917	polyamine acetylation	3	1	27.7767	0.0355732	SAT1
GO:0032918	spermidine acetylation	3	1	27.7767	0.0355732	SAT1
GO:1901624	negative regulation of lymphocyte chemotaxis	3	1	27.7767	0.0355732	CCL2
GO:0072034	renal vesicle induction	3	1	27.7767	0.0355732	WNT4
GO:0034343	type III interferon production	3	1	27.7767	0.0355732	IFIH1
GO:0034344	regulation of type III interferon production	3	1	27.7767	0.0355732	IFIH1
GO:0090204	protein localization to nuclear pore	3	1	27.7767	0.0355732	SUMO1
GO:0006065	UDP-glucuronate biosynthetic process	3	1	27.7767	0.0355732	UGP2
GO:0061184	positive regulation of dermatome development	3	1	27.7767	0.0355732	WNT4
GO:2000224	regulation of testosterone biosynthetic process	3	1	27.7767	0.0355732	WNT4
GO:1905937	negative regulation of germ cell proliferation	3	1	27.7767	0.0355732	PRDX4
GO:2000255	negative regulation of male germ cell proliferation	3	1	27.7767	0.0355732	PRDX4
GO:2001183	negative regulation of interleukin-12 secretion	3	1	27.7767	0.0355732	TLR8
GO:1901623	regulation of lymphocyte chemotaxis	25	2	6.6664	0.0358737	CCL2;CXCL13
GO:1902932	positive regulation of alcohol biosynthetic process	25	2	6.6664	0.0358737	WNT4;ABCG1
GO:0045940	positive regulation of steroid metabolic process	25	2	6.6664	0.0358737	WNT4;ABCG1
GO:0060330	regulation of response to interferon-gamma	25	2	6.6664	0.0358737	SUMO1;PARP9
GO:0060334	regulation of interferon-gamma-mediated signaling pathway	25	2	6.6664	0.0358737	SUMO1;PARP9
GO:0071624	positive regulation of granulocyte chemotaxis	25	2	6.6664	0.0358737	C3AR1;DYSF
GO:0071229	cellular response to acid chemical	203	6	2.46296	0.035954	PTGFR;NME1;NME2;FFAR2;NDUFA13;ASS1
GO:0032271	regulation of protein polymerization	203	6	2.46296	0.035954	TWF1;HSP90AA1;GMFG;PREX1;TMSB4X;CAPZA2
GO:2000147	positive regulation of cell motility	493	11	1.85929	0.035961	C3AR1;DYSF;CCL8;PREX1;TMSB4X;CXCL13;EGF;SEMA5A;ZNF703;ANXA1;GATA3
GO:0071345	cellular response to cytokine stimulus	1015	19	1.55987	0.0363435	IFI16;SUMO1;SOCS2;UBE2N;DTX1;HSP90AA1;ZFAND6;CCL2;CCL8;TEX14;NDUFA13;TMSB4X;PARP9;CXCL13;DUSP1;ANXA1;ASS1;GATA3;IFIT1B
GO:0031334	positive regulation of protein complex assembly	258	7	2.26089	0.0363893	SUMO1;PSMC6;HSP90AA1;PMAIP1;GMFG;MITF;CXCL13
GO:0042119	neutrophil activation	494	11	1.85553	0.036408	SLC2A5;TCN1;C3AR1;HSP90AA1;NME2;MPO;GMFG;OSCAR;PREX1;PRDX4;ASAH1
GO:0046677	response to antibiotic	316	8	2.10962	0.0372141	GPR37L1;PLA2G4A;HSP90AA1;GNAO1;DUSP1;ANXA1;TXN;GATA3
GO:0030833	regulation of actin filament polymerization	153	5	2.7232	0.0373437	TWF1;GMFG;PREX1;TMSB4X;CAPZA2
GO:1905114	cell surface receptor signaling pathway involved in cell-cell signaling	559	12	1.78884	0.037565	WNT4;GSKIP;GNAO1;IFT20;TNRC6C;MITF;EGF;SEMA5A;TMEM170B;ZNF703;GATA3;TCF7L2
GO:0045786	negative regulation of cell cycle	559	12	1.78884	0.037565	NR4A1;TRIAP1;VASH1;CCL2;TEX14;RPL26;NDC80;RPL24;NPM1;DUSP1;GATA3;TCF7L2
GO:0006690	icosanoid metabolic process	105	4	3.17448	0.0377052	CYP2J2;PLA2G4A;ALOX12;ANXA1
GO:0006664	glycolipid metabolic process	105	4	3.17448	0.0377052	ST8SIA1;PYURF;PIGY;ASAH1
GO:0043281	regulation of cysteine-type endopeptidase activity involved in apoptotic process	206	6	2.42709	0.0381874	NLRP3;CASP5;TRIAP1;PMAIP1;NDUFA13;ARL6IP5
GO:0002526	acute inflammatory response	154	5	2.70552	0.038236	NLRP3;C3AR1;FFAR2;ASS1;GATA3
GO:0046637	regulation of alpha-beta T cell differentiation	62	3	4.0321	0.0384108	NLRP3;ANXA1;GATA3
GO:0010564	regulation of cell cycle process	689	14	1.69321	0.0384383	WNT4;TRIAP1;DLGAP5;HSP90AA1;CCL2;TEX14;RPL26;NDC80;UBE2E1;CEP70;EGF;NPM1;DUSP1;ANXA1
GO:0016477	cell migration	1368	24	1.46193	0.038562	WNT4;SDC3;TMEM201;NR4A1;C3AR1;CORO1C;VASH1;DYSF;CCL2;CCL8;FFAR2;PREX1;TMSB4X;MITF;PARP9;ITGB5;CXCL13;EGF;SEMA5A;DUSP1;EGR3;ZNF703;ANXA1;GATA3
GO:1902624	positive regulation of neutrophil migration	26	2	6.41	0.0385622	C3AR1;DYSF
GO:0006700	C21-steroid hormone biosynthetic process	26	2	6.41	0.0385622	WNT4;TSPOAP1
GO:0015949	nucleobase-containing small molecule interconversion	26	2	6.41	0.0385622	NME1;NME2
GO:2000144	positive regulation of DNA-templated transcription, initiation	26	2	6.41	0.0385622	PSMC6;MITF
GO:2001038	regulation of cellular response to drug	26	2	6.41	0.0385622	GPR37L1;TXN
GO:1903509	liposaccharide metabolic process	106	4	3.14453	0.0388297	ST8SIA1;PYURF;PIGY;ASAH1
GO:0033365	protein localization to organelle	888	17	1.59528	0.0388709	SUMO1;RAN;HSP90AA1;ZFAND6;IFT20;RPL26;PMAIP1;NDC80;NDUFA13;NXT2;RPL24;PARP9;RPL34;TOMM7;TXN;RPL35;RPS24
GO:0015031	protein transport	1942	32	1.3731	0.0389201	NLRP3;BLZF1;NUP37;WASHC3;RAN;HSP90AA1;DYSF;ZFAND6;IFT20;RPL26;IFIH1;FFAR2;NDUFA13;ABCG1;SYTL4;NXT2;TLR8;TMSB4X;THOC7;RPL24;RPL34;NPM1;TOMM7;VPS50;ANXA1;TXN;ATP6V1G1;RPL35;RPS24;GATA3;EXOC6;TCF7L2
GO:0051896	regulation of protein kinase B signaling	207	6	2.41536	0.0389511	HSP90AA1;EGF;SEMA5A;TXN;GATA3;TCF7L2
GO:0000070	mitotic sister chromatid segregation	155	5	2.68806	0.0391413	RAN;DLGAP5;TEX14;NDC80;DUSP1
GO:0036230	granulocyte activation	500	11	1.83326	0.0391725	SLC2A5;TCN1;C3AR1;HSP90AA1;NME2;MPO;GMFG;OSCAR;PREX1;PRDX4;ASAH1
GO:1901615	organic hydroxy compound metabolic process	500	11	1.83326	0.0391725	WNT4;PLB1;ALDH2;RAN;DYSF;HDC;AOC2;ALOX12;ABCG1;GATA3;LIPA
GO:0072359	circulatory system development	1026	19	1.54315	0.0398351	WNT4;NR4A1;C3AR1;VASH1;TNFAIP2;DYSF;IFT20;ADAP2;CCL2;CCL8;PPP1R13L;SAT1;CXCL13;EGF;SEMA5A;EGR3;ANXA1;GATA3;TCF7L2
GO:0045664	regulation of neuron differentiation	628	13	1.72498	0.0398753	GPR37L1;TWF1;SOCS2;DTX1;NME1;NME2;PREX1;CDH4;CRMP1;SEMA5A;PACSIN1;LSM1;GATA3
GO:0022613	ribonucleoprotein complex biogenesis	440	10	1.89386	0.0399764	RAN;HSP90AA1;RPL26;SNRPD2;RPL24;EXOSC9;NPM1;RPL26L1;RPL35;RPS24
GO:1903201	regulation of oxidative stress-induced cell death	63	3	3.9681	0.0399861	GPR37L1;OXR1;TXN
GO:0046907	intracellular transport	1803	30	1.38652	0.0404044	RIMS3;TMEM201;ERGIC2;C12orf4;OTOF;NUP37;RAN;HSP90AA1;ZFAND6;COX5B;IFT20;RPL26;SNRPD2;NDUFA13;ABCG1;SLC25A20;SYTL4;NXT2;THOC7;TBC1D23;RPL24;RPL34;NPM1;TOMM7;VPS50;CAPZA2;TXN;RPL35;RPS24;TCF7L2
GO:0045087	innate immune response	827	16	1.61219	0.040946	NLRP3;IFI16;NCF2;SUMO1;UBE2N;CCL2;CCL8;IFIH1;FFAR2;TLR7;TLR8;PARP9;CAPZA2;ANXA1;ASS1;GATA3
GO:0006457	protein folding	210	6	2.38086	0.0413005	DNAJB4;PPIL3;HSP90AA1;GNAO1;PRDX4;EMC2
GO:0034368	protein-lipid complex remodeling	27	2	6.17259	0.041325	MPO;ABCG1
GO:0034369	plasma lipoprotein particle remodeling	27	2	6.17259	0.041325	MPO;ABCG1
GO:2000778	positive regulation of interleukin-6 secretion	27	2	6.17259	0.041325	IFIH1;TLR8
GO:0034629	cellular protein-containing complex localization	27	2	6.17259	0.041325	RAN;TNFAIP2
GO:0036474	cell death in response to hydrogen peroxide	27	2	6.17259	0.041325	GPR37L1;TXN
GO:0009314	response to radiation	443	10	1.88104	0.0415414	IFI16;RAD51AP1;TRIAP1;IFT20;RPL26;NPM1;DUSP1;ANXA1;TXN;GATA3
GO:0051272	positive regulation of cellular component movement	505	11	1.81511	0.0415859	C3AR1;DYSF;CCL8;PREX1;TMSB4X;CXCL13;EGF;SEMA5A;ZNF703;ANXA1;GATA3
GO:0071384	cellular response to corticosteroid stimulus	64	3	3.90609	0.0415937	RAN;ANXA1;ASS1
GO:0051785	positive regulation of nuclear division	64	3	3.90609	0.0415937	WNT4;DLGAP5;EGF
GO:0045732	positive regulation of protein catabolic process	211	6	2.36957	0.0421031	SUMO1;PSMC6;HSP90AA1;NDUFA13;EGF;RNF217
GO:0017038	protein import	211	6	2.36957	0.0421031	RAN;HSP90AA1;NDUFA13;NXT2;TOMM7;TXN
GO:0040011	locomotion	1738	29	1.39043	0.0422791	WNT4;SDC3;TMEM201;NR4A1;C3AR1;CORO1C;VASH1;DYSF;CCL2;CCL8;FFAR2;FPR3;PREX1;CDH4;TMSB4X;MITF;RPL24;PARP9;ITGB5;CRMP1;CXCL13;EGF;SEMA5A;ARRDC3;DUSP1;EGR3;ZNF703;ANXA1;GATA3
GO:0000041	transition metal ion transport	109	4	3.05798	0.0423176	TCN1;TMEM163;TCN2;ATP6V1G1
GO:0033993	response to lipid	898	17	1.57752	0.0424518	NLRP3;PTGFR;NR4A1;SOCS2;RAN;CCL2;NME1;NME2;MPO;FFAR2;NDUFA13;ABCG1;CXCL13;DUSP1;ZNF703;ANXA1;ASS1
GO:1902600	proton transmembrane transport	159	5	2.62044	0.0428928	COX6A1;COX5B;TMSB4X;COX7A2;ATP6V1G1
GO:0043604	amide biosynthetic process	766	15	1.63179	0.0430301	ST20-MTHFS;KLHL25;MRPS23;TNRC6C;RPL26;ASNSD1;RPL24;TRMT10C;RPL34;NPM1;RPL26L1;MRPS33;RPL35;ASS1;RPS24
GO:0002793	positive regulation of peptide secretion	268	7	2.17653	0.0431991	NLRP3;IFIH1;FFAR2;SYTL4;TLR8;GATA3;TCF7L2
GO:0015909	long-chain fatty acid transport	65	3	3.846	0.0432336	PLA2G4A;SLC25A20;ANXA1
GO:0010633	negative regulation of epithelial cell migration	65	3	3.846	0.0432336	CORO1C;VASH1;CXCL13
GO:0002292	T cell differentiation involved in immune response	65	3	3.846	0.0432336	NLRP3;ANXA1;GATA3
GO:0009247	glycolipid biosynthetic process	65	3	3.846	0.0432336	ST8SIA1;PYURF;PIGY
GO:0048534	hematopoietic or lymphoid organ development	833	16	1.60058	0.0432401	WNT4;NLRP3;IFI16;DTX1;PPP2R3C;NME1;NME2;TNRC6C;OSCAR;PREX1;MITF;TMEM176A;TMEM176B;EGR3;ANXA1;GATA3
GO:0033043	regulation of organelle organization	1246	22	1.47132	0.0439852	WNT4;TWF1;UBE2N;TRIAP1;DLGAP5;IFT20;TEX14;PMAIP1;NDC80;GMFG;PREX1;ZMYND10;TMSB4X;CEP70;EGF;SEMA5A;NPM1;DUSP1;TOMM7;CAPZA2;ANXA1;GATA3
GO:0033598	mammary gland epithelial cell proliferation	28	2	5.95214	0.0441599	ZNF703;GATA3
GO:0002724	regulation of T cell cytokine production	28	2	5.95214	0.0441599	NLRP3;GATA3
GO:0090022	regulation of neutrophil chemotaxis	28	2	5.95214	0.0441599	C3AR1;DYSF
GO:0046134	pyrimidine nucleoside biosynthetic process	28	2	5.95214	0.0441599	NME1;NME2
GO:0032673	regulation of interleukin-4 production	28	2	5.95214	0.0441599	NLRP3;GATA3
GO:0044265	cellular macromolecule catabolic process	1108	20	1.50415	0.0443268	SUMO1;UBE2N;PSMC6;HSP90AA1;KLHL25;TNRC6C;RPL26;PMAIP1;LSM7;FASTKD1;UBE2E1;RPL24;RPL34;EGF;EXOSC9;NPM1;RNF217;LSM1;RPL35;RPS24
GO:0051258	protein polymerization	270	7	2.16041	0.0446536	TWF1;WASHC3;HSP90AA1;GMFG;PREX1;TMSB4X;CAPZA2
GO:0019915	lipid storage	66	3	3.78773	0.0449054	DYSF;FFAR2;ABCG1
GO:0032651	regulation of interleukin-1 beta production	66	3	3.78773	0.0449054	NLRP3;IFI16;TLR8
GO:0000302	response to reactive oxygen species	215	6	2.32549	0.0454117	GPR37L1;GNAO1;MPO;DUSP1;ANXA1;TXN
GO:1902531	regulation of intracellular signal transduction	1824	30	1.37056	0.0459481	GPR37L1;NLRP3;HCRTR1;SOCS2;UBE2N;TRIAP1;TPT1;HSP90AA1;BCL2A1;ZFAND6;CCL2;CCL8;RPL26;PMAIP1;PPP1R13L;NDUFA13;TGM2;PREX1;TLR7;TMSB4X;ARL6IP5;PARP9;FAM13A;EGF;SEMA5A;ARRDC3;DUSP1;TXN;GATA3;TCF7L2
GO:0032479	regulation of type I interferon production	112	4	2.97607	0.0459771	IFI16;IFIH1;TLR7;TLR8
GO:0000075	cell cycle checkpoint	216	6	2.31472	0.0462634	TRIAP1;TEX14;RPL26;NDC80;RPL24;DUSP1
GO:0045454	cell redox homeostasis	67	3	3.73119	0.0466089	PRDX4;TXN;GLRX3
GO:0022408	negative regulation of cell-cell adhesion	163	5	2.55613	0.0468539	DTX1;ALOX12;ZNF703;ANXA1;ASS1
GO:0051100	negative regulation of binding	163	5	2.55613	0.0468539	IFI16;SUMO1;TEX14;TMSB4X;CRMP1
GO:0034367	protein-containing complex remodeling	29	2	5.7469	0.0470648	MPO;ABCG1
GO:0043372	positive regulation of CD4-positive, alpha-beta T cell differentiation	29	2	5.7469	0.0470648	NLRP3;ANXA1
GO:0050482	arachidonic acid secretion	29	2	5.7469	0.0470648	PLA2G4A;ANXA1
GO:1903963	arachidonate transport	29	2	5.7469	0.0470648	PLA2G4A;ANXA1
GO:1902253	regulation of intrinsic apoptotic signaling pathway by p53 class mediator	29	2	5.7469	0.0470648	TRIAP1;RPL26
GO:0051048	negative regulation of secretion	217	6	2.30406	0.0471251	NLRP3;SYTL4;TLR8;TMSB4X;EGF;ANXA1
GO:2001234	negative regulation of apoptotic signaling pathway	217	6	2.30406	0.0471251	WNT4;TRIAP1;TPT1;BCL2A1;NDUFA13;TCF7L2
GO:0097176	epoxide metabolic process	4	1	20.8325	0.0471489	ALOX12
GO:0014839	myoblast migration involved in skeletal muscle regeneration	4	1	20.8325	0.0471489	ANXA1
GO:0031394	positive regulation of prostaglandin biosynthetic process	4	1	20.8325	0.0471489	ANXA1
GO:0033031	positive regulation of neutrophil apoptotic process	4	1	20.8325	0.0471489	ANXA1
GO:0045629	negative regulation of T-helper 2 cell differentiation	4	1	20.8325	0.0471489	ANXA1
GO:1900138	negative regulation of phospholipase A2 activity	4	1	20.8325	0.0471489	ANXA1
GO:0006528	asparagine metabolic process	4	1	20.8325	0.0471489	ASNSD1
GO:0061209	cell proliferation involved in mesonephros development	4	1	20.8325	0.0471489	GATA3
GO:0033600	negative regulation of mammary gland epithelial cell proliferation	4	1	20.8325	0.0471489	GATA3
GO:0007079	mitotic chromosome movement towards spindle pole	4	1	20.8325	0.0471489	DLGAP5
GO:0001878	response to yeast	4	1	20.8325	0.0471489	MPO
GO:0035549	positive regulation of interferon-beta secretion	4	1	20.8325	0.0471489	IFIH1
GO:0090370	negative regulation of cholesterol efflux	4	1	20.8325	0.0471489	EGF
GO:1900127	positive regulation of hyaluronan biosynthetic process	4	1	20.8325	0.0471489	EGF
GO:1901490	regulation of lymphangiogenesis	4	1	20.8325	0.0471489	VASH1
GO:0030578	PML body organization	4	1	20.8325	0.0471489	SUMO1
GO:1905563	negative regulation of vascular endothelial cell proliferation	4	1	20.8325	0.0471489	CCL2
GO:0035799	ureter maturation	4	1	20.8325	0.0471489	GATA3
GO:0071442	positive regulation of histone H3-K14 acetylation	4	1	20.8325	0.0471489	GATA3
GO:0072106	regulation of ureteric bud formation	4	1	20.8325	0.0471489	GATA3
GO:0072107	positive regulation of ureteric bud formation	4	1	20.8325	0.0471489	GATA3
GO:1905278	positive regulation of epithelial tube formation	4	1	20.8325	0.0471489	GATA3
GO:0000964	mitochondrial RNA 5'-end processing	4	1	20.8325	0.0471489	TRMT10C
GO:0001692	histamine metabolic process	4	1	20.8325	0.0471489	HDC
GO:0002584	negative regulation of antigen processing and presentation of peptide antigen	4	1	20.8325	0.0471489	HLA-DOB
GO:0002586	regulation of antigen processing and presentation of peptide antigen via MHC class II	4	1	20.8325	0.0471489	HLA-DOB
GO:2001027	negative regulation of endothelial cell chemotaxis	4	1	20.8325	0.0471489	CXCL13
GO:0060699	regulation of endoribonuclease activity	4	1	20.8325	0.0471489	NPM1
GO:1901896	positive regulation of calcium-transporting ATPase activity	4	1	20.8325	0.0471489	SUMO1
GO:0018199	peptidyl-glutamine modification	4	1	20.8325	0.0471489	TGM2
GO:0061205	paramesonephric duct development	4	1	20.8325	0.0471489	WNT4
GO:0009726	detection of endogenous stimulus	4	1	20.8325	0.0471489	ABCG1
GO:0035965	cardiolipin acyl-chain remodeling	4	1	20.8325	0.0471489	PLA2G4A
GO:0071042	nuclear polyadenylation-dependent mRNA catabolic process	4	1	20.8325	0.0471489	EXOSC9
GO:0071047	polyadenylation-dependent mRNA catabolic process	4	1	20.8325	0.0471489	EXOSC9
GO:0030047	actin modification	4	1	20.8325	0.0471489	TWF1
GO:0006409	tRNA export from nucleus	4	1	20.8325	0.0471489	RAN
GO:0071431	tRNA-containing ribonucleoprotein complex export from nucleus	4	1	20.8325	0.0471489	RAN
GO:0051030	snRNA transport	4	1	20.8325	0.0471489	RAN
GO:0006598	polyamine catabolic process	4	1	20.8325	0.0471489	SAT1
GO:0061054	dermatome development	4	1	20.8325	0.0471489	WNT4
GO:0061183	regulation of dermatome development	4	1	20.8325	0.0471489	WNT4
GO:0046398	UDP-glucuronate metabolic process	4	1	20.8325	0.0471489	UGP2
GO:0044571	[2Fe-2S] cluster assembly	4	1	20.8325	0.0471489	GLRX3
GO:0044528	regulation of mitochondrial mRNA stability	4	1	20.8325	0.0471489	FASTKD1
GO:1905340	regulation of protein localization to kinetochore	4	1	20.8325	0.0471489	NDC80
GO:1905342	positive regulation of protein localization to kinetochore	4	1	20.8325	0.0471489	NDC80
GO:0099041	vesicle tethering to Golgi	4	1	20.8325	0.0471489	TBC1D23
GO:0032606	type I interferon production	113	4	2.94973	0.047235	IFI16;IFIH1;TLR7;TLR8
GO:0015833	peptide transport	1977	32	1.34879	0.0478486	NLRP3;BLZF1;NUP37;WASHC3;RAN;HSP90AA1;DYSF;ZFAND6;IFT20;RPL26;IFIH1;FFAR2;NDUFA13;ABCG1;SYTL4;NXT2;TLR8;TMSB4X;THOC7;RPL24;RPL34;NPM1;TOMM7;VPS50;ANXA1;TXN;ATP6V1G1;RPL35;RPS24;GATA3;EXOC6;TCF7L2
GO:0002920	regulation of humoral immune response	68	3	3.67632	0.0483441	C3AR1;PPP2R3C;CXCL13
GO:0051881	regulation of mitochondrial membrane potential	68	3	3.67632	0.0483441	PPP2R3C;PMAIP1;ARL6IP5
GO:0032272	negative regulation of protein polymerization	68	3	3.67632	0.0483441	TWF1;TMSB4X;CAPZA2
GO:0097190	apoptotic signaling pathway	582	12	1.71814	0.0484191	WNT4;IFI16;CASP5;TRIAP1;TPT1;GSKIP;BCL2A1;RPL26;PMAIP1;NDUFA13;ARL6IP5;TCF7L2
GO:0048585	negative regulation of response to stimulus	1545	26	1.40232	0.048909	GPR37L1;WNT4;NLRP3;PEAR1;IFI16;RGS1;SOCS2;TRIAP1;TPT1;BCL2A1;CCL2;ALOX12;NDUFA13;TMSB4X;ARL6IP5;CXCL13;EGF;SEMA5A;ARRDC3;DUSP1;TMEM170B;OXR1;ANXA1;TXN;GATA3;TCF7L2
Pathways Enrichment
geneSet	Pathway	size	overlap	enrichmentRatio	pValue	userId
R-HSA-445355	Smooth Muscle Contraction	37	5	9.7686	0.00014433	DYSF;MYL12B;MYL12A;ITGB5;ANXA1
R-HSA-168255	Influenza Life Cycle	143	9	4.54957	0.000160316	NUP37;RAN;HSP90AA1;RPL26;RPL24;RPL34;RPL26L1;RPL35;RPS24
R-HSA-168254	Influenza Infection	154	9	4.2246	0.000279891	NUP37;RAN;HSP90AA1;RPL26;RPL24;RPL34;RPL26L1;RPL35;RPS24
R-HSA-168273	Influenza Viral RNA Transcription and Replication	133	8	4.34813	0.000505669	NUP37;HSP90AA1;RPL26;RPL24;RPL34;RPL26L1;RPL35;RPS24
R-HSA-499943	Interconversion of nucleotide di- and triphosphates	30	4	9.63836	0.00072807	NME1;NME1-NME2;NME2;TXN
R-HSA-975110	TRAF6 mediated IRF7 activation in TLR7/8 or 9 signaling	15	3	14.4575	0.00104448	UBE2N;TLR7;TLR8
R-HSA-156902	Peptide chain elongation	89	6	4.87333	0.0014316	RPL26;RPL24;RPL34;RPL26L1;RPL35;RPS24
R-HSA-192823	Viral mRNA Translation	89	6	4.87333	0.0014316	RPL26;RPL24;RPL34;RPL26L1;RPL35;RPS24
R-HSA-156842	Eukaryotic Translation Elongation	93	6	4.66372	0.00179513	RPL26;RPL24;RPL34;RPL26L1;RPL35;RPS24
R-HSA-2408557	Selenocysteine synthesis	93	6	4.66372	0.00179513	RPL26;RPL24;RPL34;RPL26L1;RPL35;RPS24
R-HSA-72764	Eukaryotic Translation Termination	93	6	4.66372	0.00179513	RPL26;RPL24;RPL34;RPL26L1;RPL35;RPS24
R-HSA-975956	Nonsense Mediated Decay (NMD) independent of the Exon Junction Complex (EJC)	95	6	4.56554	0.00200123	RPL26;RPL24;RPL34;RPL26L1;RPL35;RPS24
R-HSA-373755	Semaphorin interactions	65	5	5.56059	0.00200617	HSP90AA1;MYL12B;MYL12A;CRMP1;SEMA5A
R-HSA-72689	Formation of a pool of free 40S subunits	101	6	4.29432	0.0027278	RPL26;RPL24;RPL34;RPL26L1;RPL35;RPS24
R-HSA-156827	L13a-mediated translational silencing of Ceruloplasmin expression	111	6	3.90744	0.00435605	RPL26;RPL24;RPL34;RPL26L1;RPL35;RPS24
R-HSA-72706	GTP hydrolysis and joining of the 60S ribosomal subunit	112	6	3.87255	0.0045513	RPL26;RPL24;RPL34;RPL26L1;RPL35;RPS24
R-HSA-1799339	SRP-dependent cotranslational protein targeting to membrane	112	6	3.87255	0.0045513	RPL26;RPL24;RPL34;RPL26L1;RPL35;RPS24
R-HSA-1236973	Cross-presentation of particulate exogenous antigens (phagosomes)	8	2	18.0719	0.00503889	NCF2;ITGB5
R-HSA-444473	Formyl peptide receptors bind formyl peptides and many other ligands	8	2	18.0719	0.00503889	FPR3;ANXA1
R-HSA-927802	Nonsense-Mediated Decay (NMD)	115	6	3.77153	0.00517587	RPL26;RPL24;RPL34;RPL26L1;RPL35;RPS24
R-HSA-975957	Nonsense Mediated Decay (NMD) enhanced by the Exon Junction Complex (EJC)	115	6	3.77153	0.00517587	RPL26;RPL24;RPL34;RPL26L1;RPL35;RPS24
R-HSA-2408522	Selenoamino acid metabolism	118	6	3.67564	0.00586119	RPL26;RPL24;RPL34;RPL26L1;RPL35;RPS24
R-HSA-72613	Eukaryotic Translation Initiation	119	6	3.64476	0.00610371	RPL26;RPL24;RPL34;RPL26L1;RPL35;RPS24
R-HSA-72737	Cap-dependent Translation Initiation	119	6	3.64476	0.00610371	RPL26;RPL24;RPL34;RPL26L1;RPL35;RPS24
R-HSA-1482788	Acyl chain remodelling of PC	28	3	7.74511	0.00659484	PLA2G4A;PLB1;LPCAT2
R-HSA-72312	rRNA processing	205	8	2.82098	0.00758326	RPL26;RPL24;TRMT10C;RPL34;EXOSC9;RPL26L1;RPL35;RPS24
R-HSA-9010553	Regulation of expression of SLITs and ROBOs	171	7	2.95914	0.00957266	PSMC6;RPL26;RPL24;RPL34;RPL26L1;RPL35;RPS24
R-HSA-180746	Nuclear import of Rev protein	32	3	6.77697	0.00959162	NUP37;RAN;NPM1
R-HSA-168249	Innate Immune System	1053	24	1.64758	0.00967814	NLRP3;SLC2A5;IFI16;FCER1A;NCF2;TCN1;C3AR1;UBE2N;PSMC6;HSP90AA1;NME1-NME2;NME2;MPO;IFIH1;GMFG;OSCAR;PRDX4;TLR7;TLR8;UBA3;CAPZA2;ASAH1;TXN;ATP6V1G1
R-HSA-211000	Gene Silencing by RNA	135	6	3.21279	0.0110506	NUP37;RAN;HSP90AA1;TNRC6C;HIST1H2AD;HIST1H4E
R-HSA-8953854	Metabolism of RNA	674	17	1.82328	0.0116716	APOBEC4;PPIL3;NUP37;RAN;PSMC6;RPL26;LSM7;SNRPD2;THOC7;RPL24;TRMT10C;RPL34;EXOSC9;RPL26L1;LSM1;RPL35;RPS24
R-HSA-177243	Interactions of Rev with host cellular proteins	35	3	6.19609	0.0122818	NUP37;RAN;NPM1
R-HSA-1679131	Trafficking and processing of endosomal TLR	13	2	11.1212	0.0134153	TLR7;TLR8
R-HSA-5689901	Metalloprotease DUBs	37	3	5.86116	0.0142917	NLRP3;HIST1H2AD;HIST1H2AL
R-HSA-6791226	Major pathway of rRNA processing in the nucleolus and cytosol	185	7	2.73521	0.0143094	RPL26;RPL24;RPL34;EXOSC9;RPL26L1;RPL35;RPS24
R-HSA-196854	Metabolism of vitamins and cofactors	189	7	2.67732	0.0159259	SDC3;TCN1;PLB1;COQ5;HSP90AA1;TCN2;PARP9
R-HSA-375276	Peptide ligand-binding receptors	190	7	2.66323	0.0163495	GPR37L1;HCRTR1;NMUR1;C3AR1;FPR3;CXCL13;ANXA1
R-HSA-5663205	Infectious disease	382	11	2.08158	0.016898	NUP37;RAN;PSMC6;HSP90AA1;RPL26;RPL24;RPL34;NPM1;RPL26L1;RPL35;RPS24
R-HSA-844456	The NLRP3 inflammasome	15	2	9.63836	0.017736	NLRP3;TXN
R-HSA-5637810	Constitutive Signaling by EGFRvIII	15	2	9.63836	0.017736	HSP90AA1;EGF
R-HSA-5637812	Signaling by EGFRvIII in Cancer	15	2	9.63836	0.017736	HSP90AA1;EGF
R-HSA-430039	mRNA decay by 5' to 3' exoribonuclease	15	2	9.63836	0.017736	LSM7;LSM1
R-HSA-8868773	rRNA processing in the nucleus and cytosol	195	7	2.59494	0.0185883	RPL26;RPL24;RPL34;EXOSC9;RPL26L1;RPL35;RPS24
R-HSA-418594	G alpha (i) signalling events	396	11	2.00799	0.0214396	GPR37L1;SDC3;PLA2G4A;RGS1;NMUR1;PLB1;C3AR1;GNAO1;FPR3;CXCL13;ANXA1
R-HSA-3214858	RMTs methylate histone arginines	79	4	3.66014	0.0237411	ACTL6A;HIST1H2AD;HIST1H4E;HIST1H2AL
R-HSA-397014	Muscle contraction	206	7	2.45638	0.0242567	DYSF;MYL12B;MYL12A;SCN3A;ITGB5;KCNK5;ANXA1
R-HSA-1236382	Constitutive Signaling by Ligand-Responsive EGFR Cancer Variants	19	2	7.60923	0.0278636	HSP90AA1;EGF
R-HSA-1643713	Signaling by EGFR in Cancer	19	2	7.60923	0.0278636	HSP90AA1;EGF
R-HSA-5637815	Signaling by Ligand-Responsive EGFR Variants in Cancer	19	2	7.60923	0.0278636	HSP90AA1;EGF
R-HSA-5696399	Global Genome Nucleotide Excision Repair (GG-NER)	84	4	3.44227	0.028933	SUMO1;UBE2N;COPS2;ACTL6A
R-HSA-8978934	Metabolism of cofactors	20	2	7.22877	0.0306832	COQ5;HSP90AA1
R-HSA-5625900	RHO GTPases activate CIT	20	2	7.22877	0.0306832	MYL12B;MYL12A
R-HSA-3232118	SUMOylation of transcription factors	20	2	7.22877	0.0306832	SUMO1;MITF
R-HSA-5627117	RHO GTPases Activate ROCKs	20	2	7.22877	0.0306832	MYL12B;MYL12A
R-HSA-622312	Inflammasomes	20	2	7.22877	0.0306832	NLRP3;TXN
R-HSA-6803204	TP53 Regulates Transcription of Genes Involved in Cytochrome C Release	20	2	7.22877	0.0306832	TRIAP1;PMAIP1
R-HSA-5628897	TP53 Regulates Metabolic Genes	86	4	3.36222	0.031184	COX6A1;COX5B;TNRC6C;TXN
R-HSA-376176	Signaling by ROBO receptors	218	7	2.32116	0.0316894	PSMC6;RPL26;RPL24;RPL34;RPL26L1;RPL35;RPS24
R-HSA-71291	Metabolism of amino acids and derivatives	370	10	1.95372	0.0325839	PSMC6;HDC;RPL26;SAT1;RPL24;RPL34;RPL26L1;RPL35;ASS1;RPS24
R-HSA-416572	Sema4D induced cell migration and growth-cone collapse	21	2	6.88454	0.0336106	MYL12B;MYL12A
R-HSA-196741	Cobalamin (Cbl, vitamin B12) transport and metabolism	21	2	6.88454	0.0336106	TCN1;TCN2
R-HSA-373076	Class A/1 (Rhodopsin-like receptors)	324	9	2.00799	0.0358726	GPR37L1;HCRTR1;PTGFR;NMUR1;C3AR1;FFAR2;FPR3;CXCL13;ANXA1
R-HSA-168643	Nucleotide-binding domain, leucine rich repeat containing receptor (NLR) signaling pathways	55	3	3.94296	0.0403538	NLRP3;UBE2N;TXN
R-HSA-5339700	TCF7L2 mutants don't bind CTBP	3	1	24.0959	0.0409332	TCF7L2
R-HSA-212718	EGFR interacts with phospholipase C-gamma	3	1	24.0959	0.0409332	EGF
R-HSA-351200	Interconversion of polyamines	3	1	24.0959	0.0409332	SAT1
R-HSA-380615	Serotonin clearance from the synaptic cleft	3	1	24.0959	0.0409332	ALDH2
R-HSA-173599	Formation of the active cofactor, UDP-glucuronate	3	1	24.0959	0.0409332	UGP2
R-HSA-5688031	Defective pro-SFTPB causes pulmonary surfactant metabolism dysfunction 1 (SMDP1) and respiratory distress syndrome (RDS)	3	1	24.0959	0.0409332	SFTPB
R-HSA-422475	Axon guidance	551	13	1.70552	0.041626	PSMC6;HSP90AA1;RPL26;MYL12B;MYL12A;SCN3A;RPL24;CRMP1;RPL34;SEMA5A;RPL26L1;RPL35;RPS24
R-HSA-429914	Deadenylation-dependent mRNA decay	56	3	3.87255	0.0422194	LSM7;EXOSC9;LSM1
R-HSA-5625740	RHO GTPases activate PKNs	95	4	3.04369	0.0425633	MYL12B;MYL12A;HIST1H2AD;HIST1H4E
R-HSA-5627123	RHO GTPases activate PAKs	24	2	6.02397	0.0430052	MYL12B;MYL12A
R-HSA-210500	Glutamate Neurotransmitter Release Cycle	24	2	6.02397	0.0430052	TSPOAP1;ARL6IP5
R-HSA-8951664	Neddylation	234	7	2.16245	0.0437881	SOCS2;LRR1;PSMC6;COPS2;KLHL25;UBA3;COMMD10
R-HSA-157118	Signaling by NOTCH	235	7	2.15325	0.0446311	DTX1;PSMC6;DLGAP5;TNRC6C;EGF;HIST1H2AD;HIST1H4E
R-HSA-400685	Sema4D in semaphorin signaling	25	2	5.78301	0.0463298	MYL12B;MYL12A
R-HSA-380994	ATF4 activates genes	25	2	5.78301	0.0463298	CCL2;EXOSC9
R-HSA-2142753	Arachidonic acid metabolism	59	3	3.67564	0.0480712	CYP2J2;PLA2G4A;ALOX12
R-HSA-72766	Translation	291	8	1.98729	0.0489277	MRPS23;RPL26;RPL24;RPL34;RPL26L1;MRPS33;RPL35;RPS24
R-HSA-611105	Respiratory electron transport	100	4	2.89151	0.0497727	COX6A1;COX5B;NDUFA13;NDUFB2

## Sheet: Table S5-2
Table S5. GO and pathway enrichment analysis in SLE looping associated genes.
Table S5-2 .Pathway Enrichment analysis in SLE looping associated genes.
geneSet	Pathway	size	overlap	enrichmentRatio	pValue	userId
R-HSA-445355	Smooth Muscle Contraction	37	5	9.7686	0.00014433	DYSF;MYL12B;MYL12A;ITGB5;ANXA1
R-HSA-168255	Influenza Life Cycle	143	9	4.54957	0.000160316	NUP37;RAN;HSP90AA1;RPL26;RPL24;RPL34;RPL26L1;RPL35;RPS24
R-HSA-168254	Influenza Infection	154	9	4.2246	0.000279891	NUP37;RAN;HSP90AA1;RPL26;RPL24;RPL34;RPL26L1;RPL35;RPS24
R-HSA-168273	Influenza Viral RNA Transcription and Replication	133	8	4.34813	0.000505669	NUP37;HSP90AA1;RPL26;RPL24;RPL34;RPL26L1;RPL35;RPS24
R-HSA-499943	Interconversion of nucleotide di- and triphosphates	30	4	9.63836	0.00072807	NME1;NME1-NME2;NME2;TXN
R-HSA-975110	TRAF6 mediated IRF7 activation in TLR7/8 or 9 signaling	15	3	14.4575	0.00104448	UBE2N;TLR7;TLR8
R-HSA-156902	Peptide chain elongation	89	6	4.87333	0.0014316	RPL26;RPL24;RPL34;RPL26L1;RPL35;RPS24
R-HSA-192823	Viral mRNA Translation	89	6	4.87333	0.0014316	RPL26;RPL24;RPL34;RPL26L1;RPL35;RPS24
R-HSA-156842	Eukaryotic Translation Elongation	93	6	4.66372	0.00179513	RPL26;RPL24;RPL34;RPL26L1;RPL35;RPS24
R-HSA-2408557	Selenocysteine synthesis	93	6	4.66372	0.00179513	RPL26;RPL24;RPL34;RPL26L1;RPL35;RPS24
R-HSA-72764	Eukaryotic Translation Termination	93	6	4.66372	0.00179513	RPL26;RPL24;RPL34;RPL26L1;RPL35;RPS24
R-HSA-975956	Nonsense Mediated Decay (NMD) independent of the Exon Junction Complex (EJC)	95	6	4.56554	0.00200123	RPL26;RPL24;RPL34;RPL26L1;RPL35;RPS24
R-HSA-373755	Semaphorin interactions	65	5	5.56059	0.00200617	HSP90AA1;MYL12B;MYL12A;CRMP1;SEMA5A
R-HSA-72689	Formation of a pool of free 40S subunits	101	6	4.29432	0.0027278	RPL26;RPL24;RPL34;RPL26L1;RPL35;RPS24
R-HSA-156827	L13a-mediated translational silencing of Ceruloplasmin expression	111	6	3.90744	0.00435605	RPL26;RPL24;RPL34;RPL26L1;RPL35;RPS24
R-HSA-72706	GTP hydrolysis and joining of the 60S ribosomal subunit	112	6	3.87255	0.0045513	RPL26;RPL24;RPL34;RPL26L1;RPL35;RPS24
R-HSA-1799339	SRP-dependent cotranslational protein targeting to membrane	112	6	3.87255	0.0045513	RPL26;RPL24;RPL34;RPL26L1;RPL35;RPS24
R-HSA-1236973	Cross-presentation of particulate exogenous antigens (phagosomes)	8	2	18.0719	0.00503889	NCF2;ITGB5
R-HSA-444473	Formyl peptide receptors bind formyl peptides and many other ligands	8	2	18.0719	0.00503889	FPR3;ANXA1
R-HSA-927802	Nonsense-Mediated Decay (NMD)	115	6	3.77153	0.00517587	RPL26;RPL24;RPL34;RPL26L1;RPL35;RPS24
R-HSA-975957	Nonsense Mediated Decay (NMD) enhanced by the Exon Junction Complex (EJC)	115	6	3.77153	0.00517587	RPL26;RPL24;RPL34;RPL26L1;RPL35;RPS24
R-HSA-2408522	Selenoamino acid metabolism	118	6	3.67564	0.00586119	RPL26;RPL24;RPL34;RPL26L1;RPL35;RPS24
R-HSA-72613	Eukaryotic Translation Initiation	119	6	3.64476	0.00610371	RPL26;RPL24;RPL34;RPL26L1;RPL35;RPS24
R-HSA-72737	Cap-dependent Translation Initiation	119	6	3.64476	0.00610371	RPL26;RPL24;RPL34;RPL26L1;RPL35;RPS24
R-HSA-1482788	Acyl chain remodelling of PC	28	3	7.74511	0.00659484	PLA2G4A;PLB1;LPCAT2
R-HSA-72312	rRNA processing	205	8	2.82098	0.00758326	RPL26;RPL24;TRMT10C;RPL34;EXOSC9;RPL26L1;RPL35;RPS24
R-HSA-9010553	Regulation of expression of SLITs and ROBOs	171	7	2.95914	0.00957266	PSMC6;RPL26;RPL24;RPL34;RPL26L1;RPL35;RPS24
R-HSA-180746	Nuclear import of Rev protein	32	3	6.77697	0.00959162	NUP37;RAN;NPM1
R-HSA-168249	Innate Immune System	1053	24	1.64758	0.00967814	NLRP3;SLC2A5;IFI16;FCER1A;NCF2;TCN1;C3AR1;UBE2N;PSMC6;HSP90AA1;NME1-NME2;NME2;MPO;IFIH1;GMFG;OSCAR;PRDX4;TLR7;TLR8;UBA3;CAPZA2;ASAH1;TXN;ATP6V1G1
R-HSA-211000	Gene Silencing by RNA	135	6	3.21279	0.0110506	NUP37;RAN;HSP90AA1;TNRC6C;HIST1H2AD;HIST1H4E
R-HSA-8953854	Metabolism of RNA	674	17	1.82328	0.0116716	APOBEC4;PPIL3;NUP37;RAN;PSMC6;RPL26;LSM7;SNRPD2;THOC7;RPL24;TRMT10C;RPL34;EXOSC9;RPL26L1;LSM1;RPL35;RPS24
R-HSA-177243	Interactions of Rev with host cellular proteins	35	3	6.19609	0.0122818	NUP37;RAN;NPM1
R-HSA-1679131	Trafficking and processing of endosomal TLR	13	2	11.1212	0.0134153	TLR7;TLR8
R-HSA-5689901	Metalloprotease DUBs	37	3	5.86116	0.0142917	NLRP3;HIST1H2AD;HIST1H2AL
R-HSA-6791226	Major pathway of rRNA processing in the nucleolus and cytosol	185	7	2.73521	0.0143094	RPL26;RPL24;RPL34;EXOSC9;RPL26L1;RPL35;RPS24
R-HSA-196854	Metabolism of vitamins and cofactors	189	7	2.67732	0.0159259	SDC3;TCN1;PLB1;COQ5;HSP90AA1;TCN2;PARP9
R-HSA-375276	Peptide ligand-binding receptors	190	7	2.66323	0.0163495	GPR37L1;HCRTR1;NMUR1;C3AR1;FPR3;CXCL13;ANXA1
R-HSA-5663205	Infectious disease	382	11	2.08158	0.016898	NUP37;RAN;PSMC6;HSP90AA1;RPL26;RPL24;RPL34;NPM1;RPL26L1;RPL35;RPS24
R-HSA-844456	The NLRP3 inflammasome	15	2	9.63836	0.017736	NLRP3;TXN
R-HSA-5637810	Constitutive Signaling by EGFRvIII	15	2	9.63836	0.017736	HSP90AA1;EGF
R-HSA-5637812	Signaling by EGFRvIII in Cancer	15	2	9.63836	0.017736	HSP90AA1;EGF
R-HSA-430039	mRNA decay by 5' to 3' exoribonuclease	15	2	9.63836	0.017736	LSM7;LSM1
R-HSA-8868773	rRNA processing in the nucleus and cytosol	195	7	2.59494	0.0185883	RPL26;RPL24;RPL34;EXOSC9;RPL26L1;RPL35;RPS24
R-HSA-418594	G alpha (i) signalling events	396	11	2.00799	0.0214396	GPR37L1;SDC3;PLA2G4A;RGS1;NMUR1;PLB1;C3AR1;GNAO1;FPR3;CXCL13;ANXA1
R-HSA-3214858	RMTs methylate histone arginines	79	4	3.66014	0.0237411	ACTL6A;HIST1H2AD;HIST1H4E;HIST1H2AL
R-HSA-397014	Muscle contraction	206	7	2.45638	0.0242567	DYSF;MYL12B;MYL12A;SCN3A;ITGB5;KCNK5;ANXA1
R-HSA-1236382	Constitutive Signaling by Ligand-Responsive EGFR Cancer Variants	19	2	7.60923	0.0278636	HSP90AA1;EGF
R-HSA-1643713	Signaling by EGFR in Cancer	19	2	7.60923	0.0278636	HSP90AA1;EGF
R-HSA-5637815	Signaling by Ligand-Responsive EGFR Variants in Cancer	19	2	7.60923	0.0278636	HSP90AA1;EGF
R-HSA-5696399	Global Genome Nucleotide Excision Repair (GG-NER)	84	4	3.44227	0.028933	SUMO1;UBE2N;COPS2;ACTL6A
R-HSA-8978934	Metabolism of cofactors	20	2	7.22877	0.0306832	COQ5;HSP90AA1
R-HSA-5625900	RHO GTPases activate CIT	20	2	7.22877	0.0306832	MYL12B;MYL12A
R-HSA-3232118	SUMOylation of transcription factors	20	2	7.22877	0.0306832	SUMO1;MITF
R-HSA-5627117	RHO GTPases Activate ROCKs	20	2	7.22877	0.0306832	MYL12B;MYL12A
R-HSA-622312	Inflammasomes	20	2	7.22877	0.0306832	NLRP3;TXN
R-HSA-6803204	TP53 Regulates Transcription of Genes Involved in Cytochrome C Release	20	2	7.22877	0.0306832	TRIAP1;PMAIP1
R-HSA-5628897	TP53 Regulates Metabolic Genes	86	4	3.36222	0.031184	COX6A1;COX5B;TNRC6C;TXN
R-HSA-376176	Signaling by ROBO receptors	218	7	2.32116	0.0316894	PSMC6;RPL26;RPL24;RPL34;RPL26L1;RPL35;RPS24
R-HSA-71291	Metabolism of amino acids and derivatives	370	10	1.95372	0.0325839	PSMC6;HDC;RPL26;SAT1;RPL24;RPL34;RPL26L1;RPL35;ASS1;RPS24
R-HSA-416572	Sema4D induced cell migration and growth-cone collapse	21	2	6.88454	0.0336106	MYL12B;MYL12A
R-HSA-196741	Cobalamin (Cbl, vitamin B12) transport and metabolism	21	2	6.88454	0.0336106	TCN1;TCN2
R-HSA-373076	Class A/1 (Rhodopsin-like receptors)	324	9	2.00799	0.0358726	GPR37L1;HCRTR1;PTGFR;NMUR1;C3AR1;FFAR2;FPR3;CXCL13;ANXA1
R-HSA-168643	Nucleotide-binding domain, leucine rich repeat containing receptor (NLR) signaling pathways	55	3	3.94296	0.0403538	NLRP3;UBE2N;TXN
R-HSA-5339700	TCF7L2 mutants don't bind CTBP	3	1	24.0959	0.0409332	TCF7L2
R-HSA-212718	EGFR interacts with phospholipase C-gamma	3	1	24.0959	0.0409332	EGF
R-HSA-351200	Interconversion of polyamines	3	1	24.0959	0.0409332	SAT1
R-HSA-380615	Serotonin clearance from the synaptic cleft	3	1	24.0959	0.0409332	ALDH2
R-HSA-173599	Formation of the active cofactor, UDP-glucuronate	3	1	24.0959	0.0409332	UGP2
R-HSA-5688031	Defective pro-SFTPB causes pulmonary surfactant metabolism dysfunction 1 (SMDP1) and respiratory distress syndrome (RDS)	3	1	24.0959	0.0409332	SFTPB
R-HSA-422475	Axon guidance	551	13	1.70552	0.041626	PSMC6;HSP90AA1;RPL26;MYL12B;MYL12A;SCN3A;RPL24;CRMP1;RPL34;SEMA5A;RPL26L1;RPL35;RPS24
R-HSA-429914	Deadenylation-dependent mRNA decay	56	3	3.87255	0.0422194	LSM7;EXOSC9;LSM1
R-HSA-5625740	RHO GTPases activate PKNs	95	4	3.04369	0.0425633	MYL12B;MYL12A;HIST1H2AD;HIST1H4E
R-HSA-5627123	RHO GTPases activate PAKs	24	2	6.02397	0.0430052	MYL12B;MYL12A
R-HSA-210500	Glutamate Neurotransmitter Release Cycle	24	2	6.02397	0.0430052	TSPOAP1;ARL6IP5
R-HSA-8951664	Neddylation	234	7	2.16245	0.0437881	SOCS2;LRR1;PSMC6;COPS2;KLHL25;UBA3;COMMD10
R-HSA-157118	Signaling by NOTCH	235	7	2.15325	0.0446311	DTX1;PSMC6;DLGAP5;TNRC6C;EGF;HIST1H2AD;HIST1H4E
R-HSA-400685	Sema4D in semaphorin signaling	25	2	5.78301	0.0463298	MYL12B;MYL12A
R-HSA-380994	ATF4 activates genes	25	2	5.78301	0.0463298	CCL2;EXOSC9
R-HSA-2142753	Arachidonic acid metabolism	59	3	3.67564	0.0480712	CYP2J2;PLA2G4A;ALOX12
R-HSA-72766	Translation	291	8	1.98729	0.0489277	MRPS23;RPL26;RPL24;RPL34;RPL26L1;MRPS33;RPL35;RPS24
R-HSA-611105	Respiratory electron transport	100	4	2.89151	0.0497727	COX6A1;COX5B;NDUFA13;NDUFB2
